# Supplementary material for: Microwave-assisted copper catalyzed decarboxylative reductive coupling ofpara-quinone methides with 3-indoleacetic acids: rapid access to polycyclic spiroindolequinone derivatives
Source: Royal Society of Chemistry journal article supplement (doi:10.1039/d3qo00026e), 2023-01-01

## Supporting Information

# Microwave-Assisted Copper Catalytic Decarboxylative Reductive Coupling of *para*-Quinone Methides with 3-Indoleacetic Acids: Rapid Access to Polycyclic Spiroindolequinone derivatives

Gui-Ting Song,<sup>a,#</sup> Yuan Liu,<sup>a,#</sup> Yong Li,<sup>a</sup> Xin-Yue Hu,<sup>a</sup> Shu-Ting Li,<sup>a</sup> Jian-Bo Liu,<sup>a</sup> and Chuan-Hua Qu<sup>\*,a</sup>

<sup>a</sup> College of Pharmacy, National & Local Joint Engineering Research Center of Targeted and Innovative Therapeutics, Chongqing Key Laboratory of Kinase Modulators as Innovative Medicine, Chongqing University of Arts and Sciences, Chongqing 402160, China.

<sup>#</sup>These authors contributed equally to this work.

### Table of Contents

1. General Information
2. Microwave Irradiation Experiments
3. General Procedure for Synthesis of Difluorinated Diarylmethanes
4. Gram Scale-up Experiment
5. Follow-up Experiment
6. Characterization Data of Compounds
7. Reference
8. Copies <sup>1</sup>H NMR, <sup>13</sup>C NMR, <sup>19</sup>F NMR
9. HRMS Spectrum

## 1. General Information

$^1\text{H}$  and  $^{13}\text{C}$  NMR were recorded on a Biotage 400 spectrometer.  $^1\text{H}$  NMR data are reported as follows: chemical shift in ppm ( $\delta$ ), multiplicity (s = singlet, d = doublet, t = triplet, m = multiplet), coupling constant (Hz), relative intensity.  $^{13}\text{C}$  NMR data are reported as follows: chemical shift in ppm ( $\delta$ ). HPLC-MS analyses were performed on a Shimadzu-2020 LC-MS instrument using the following conditions: Shim-pack VP-ODS C18 column (reverse phase, 50 x 4.6 mm); a linear gradient from 10% water and 90% acetonitrile to 95% acetonitrile and 5% water over 4.0 min; flow rate of 1 mL/min; UV photodiode array detection from 200 to 300 nm. The products were purified by Biotage Isolera™ Spektra Systems and Petroleum Ether/EtOAc solvent systems. All reagents and solvents were obtained from commercial sources and used without further purification. Melting points (m.p.) were determined on a micro melting point apparatus (WRX-4) and were uncorrected.

## 2. Microwave Irradiation Experiments

All microwave irradiation experiments were carried out in a Biotage® Initiator Classic microwave apparatus with continuous irradiation power from 0 to 400W with utilization of the standard absorbance level of 250W maximum power. The reactions were carried out in 10 mL glass tubes, sealed with microwave cavity. The reaction was irradiated at a required ceiling temperature using maximum power for the stipulated time. Then it was cooled to 50 °C with gas jet cooling.

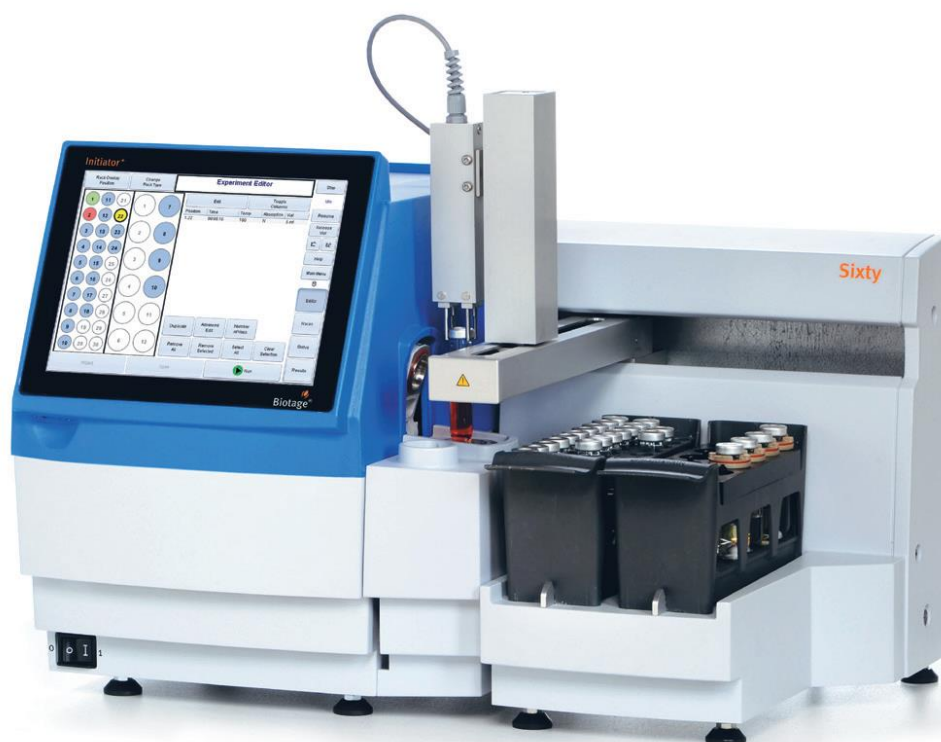

## 2. Unsuccessful substrates

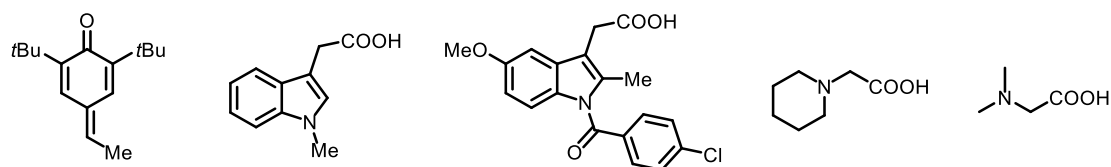

### 3. General Procedure for Synthesis of Indolyated Diarylethanes

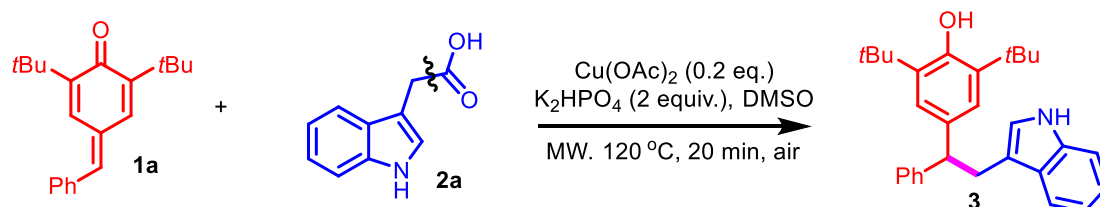

In an oven-dried glass tubes *p*-QM<sup>1</sup> **1a** (60 mg, 0.2 mmol, 1.0 eq.), 3-indoleacetic acids **2a** (53 mg, 0.3 mmol, 1.5 eq.), K<sub>2</sub>HPO<sub>4</sub> (70 mg, 0.4 mmol, 2.0 eq.), and Cu(OAc)<sub>2</sub> (8 mg, 0.04 mmol, 0.2 equiv.) were dissolved in DMSO (2 mL) and the reaction mixture was stirred at MW 120 °C for 20 min by microwave irradiation and monitored by TLC. Then the reaction mixture was extracted using EtOAc/H<sub>2</sub>O and concentrated under reduced pressure followed by column chromatography over silica gel using petroleum / EtOAc = 20/1 as eluent to afford the desired product **3** (79 mg, 93% yield).

### 4. Gram Scale-up Experiment

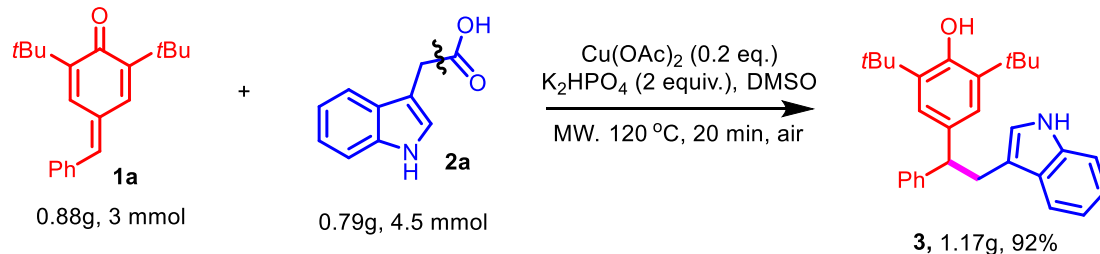

In an oven-dried glass tubes *p*-QM **1a** (880 mg, 3 mmol, 1.0 eq.), 3-indoleacetic acids **2a** (790 mg, 4.5 mmol, 1.5 eq.), K<sub>2</sub>HPO<sub>4</sub> (1045 mg, 6 mmol, 2.0 eq.), and Cu(OAc)<sub>2</sub> (120 mg, 0.6 mmol, 0.2 equiv.) were dissolved in DMSO (20 mL) and the reaction mixture was stirred at MW 120 °C for 20 min by microwave irradiation and monitored by TLC. Then the reaction mixture was extracted using EtOAc/H<sub>2</sub>O and concentrated under reduced pressure followed by column chromatography over silica gel using petroleum / EtOAc = 20/1 as eluent to afford the desired product **3** (1170 mg, 92% yield).

### 5. General Procedure for Synthesis of Polycyclic Spiroindolequinones

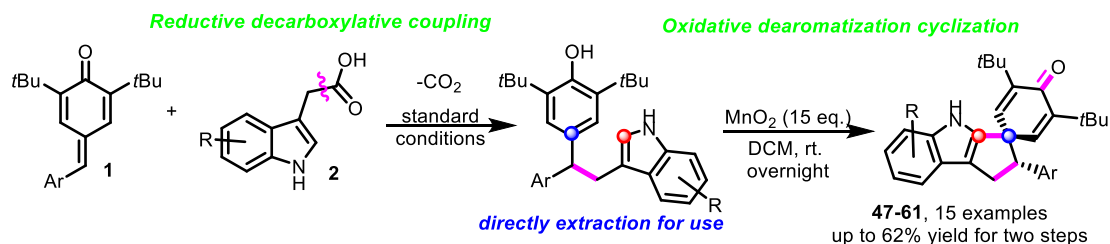

### Procedure 1: synthesis of indolylated diarylethanes

*p*-QMs **1** (0.2 mmol, 1.0 equiv.), 3-indoleacetic acids **2** (0.3 mmol, 1.5 equiv.), K<sub>2</sub>HPO<sub>4</sub> (70 mg, 1.2 mmol, 2.0 equiv.), and Cu(OAc)<sub>2</sub> (8 mg, 0.04 mmol, 0.2 equiv.) were dissolved in DMSO (2 mL) in a screw capped vial equipped with a magnetic stir bar and the reaction mixture was stirred at **MW** 120 °C for 20 min by microwave irradiation and monitored by TLC. The crude product could be directly used by extraction using EtOAc/H<sub>2</sub>O and concentrated under reduced pressure.

### Procedure 2: synthesis of polycyclic spiroindolequinones

The solution of indolylated diarylethane crude product (ca. 0.18 mmol, ca. 88% yield, 1.0 eq.) in DCM (2 mL) was added MnO<sub>2</sub> (2.7 mmol, 235 mg, ca. 15 eq) in a flame-dried Schlenk flask containing a stirring bar. The reaction mixture was stirred at room temperature overnight and monitored by TLC. After completion of the reaction, the mixture was purified by chromatography on silica gel (EtOAc/ *n*-hexane = 3% as eluent) to afford the polycyclic spiroindolequinones **47-61**.

### Unsuccessful substrates

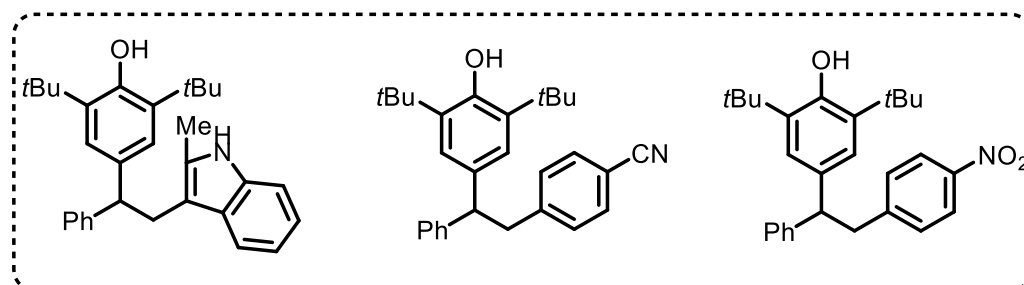

### Analysis of reaction by-products

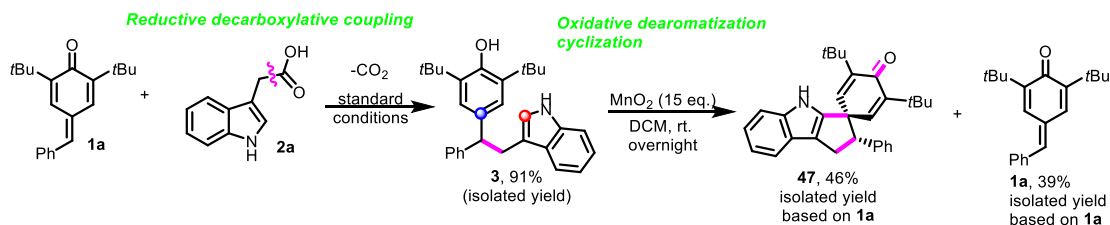

### Procedure 1: synthesis of indolylated diarylethanes

In an oven-dried glass tubes *p*-QM **1a** (60 mg, 0.2 mmol, 1.0 eq.), 3-indoleacetic acids **2a** (53 mg, 0.3 mmol, 1.5 eq.), K<sub>2</sub>HPO<sub>4</sub> (70 mg, 0.4 mmol, 2.0 eq.), and Cu(OAc)<sub>2</sub> (8 mg, 0.04 mmol, 0.2 equiv.) were dissolved in DMSO (2 mL) and the reaction mixture was stirred at **MW** 120 °C for 20 min by microwave irradiation and monitored by TLC. Then the reaction mixture was extracted using EtOAc/H<sub>2</sub>O and concentrated under reduced pressure followed by column chromatography over silica

gel using petroleum / EtOAc = 20/1 as eluent to afford the desired product **3** (77 mg, 91% yield).

### Procedure 2: synthesis of polycyclic spiroindolequinones

The solution of indolyated diarylethane product (77 mg, 0.18 mmol, 1.0 eq.) in DCM (2mL) was added MnO<sub>2</sub> (2.7 mmol, 235 mg, 15 eq) in a flame-dried Schlenk flask containing a stirring bar. The reaction mixture was stirred at room temperature overnight and monitored by TLC. After completion of the reaction, the mixture was purified by chromatography on silica gel (EtOAc/ n-hexane = 3% as eluent) to afford the polycyclic spiroindolequinones **47** (39 mg, 46% yield based **1a** 0.2 mmol) and **1a** (23 mg, 39% yield based **1a** 0.2 mmol).

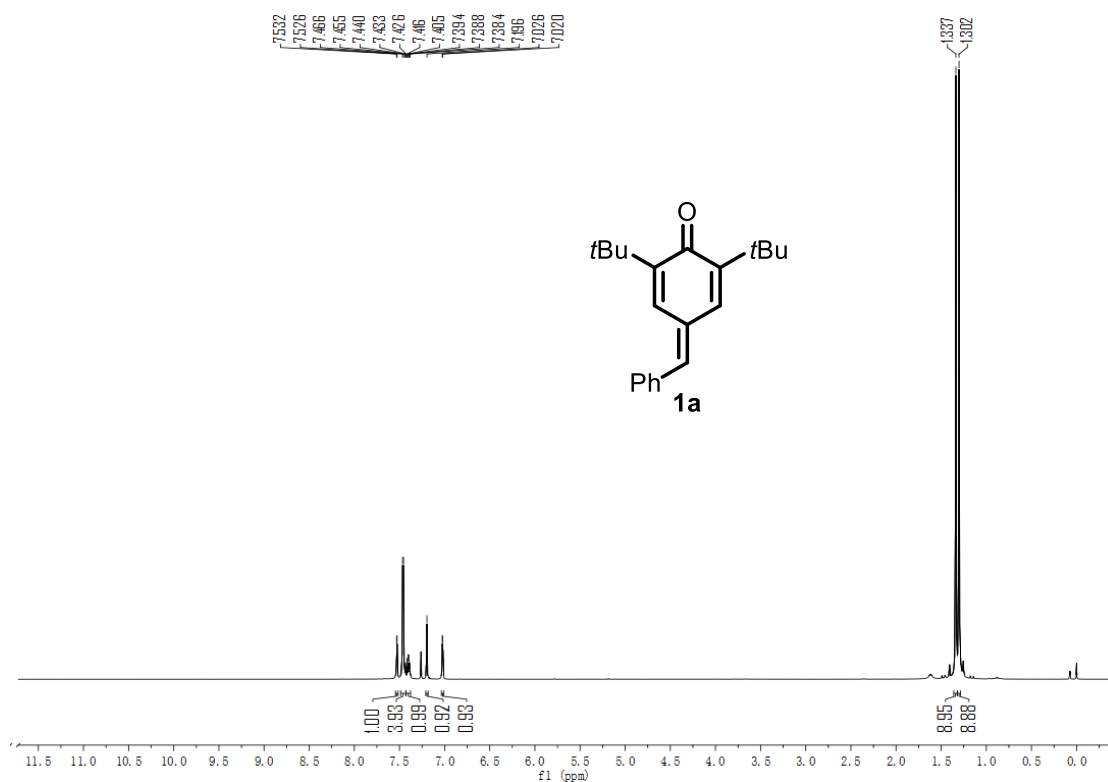

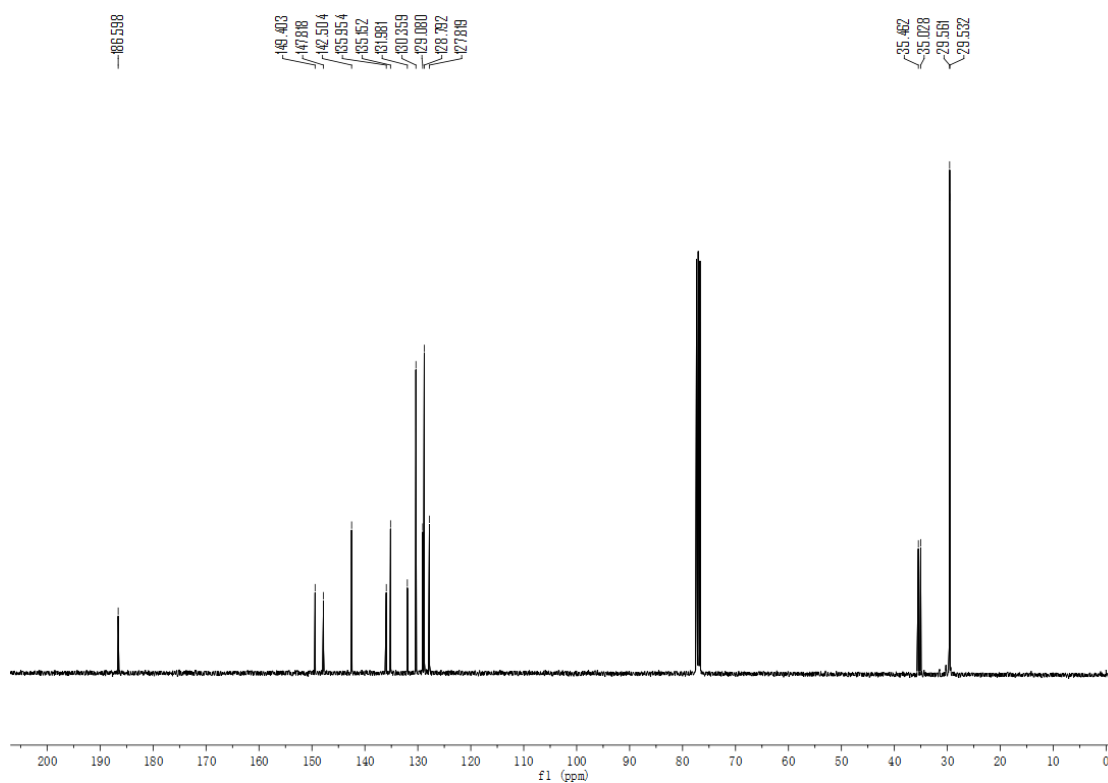

### Other oxidant attempts

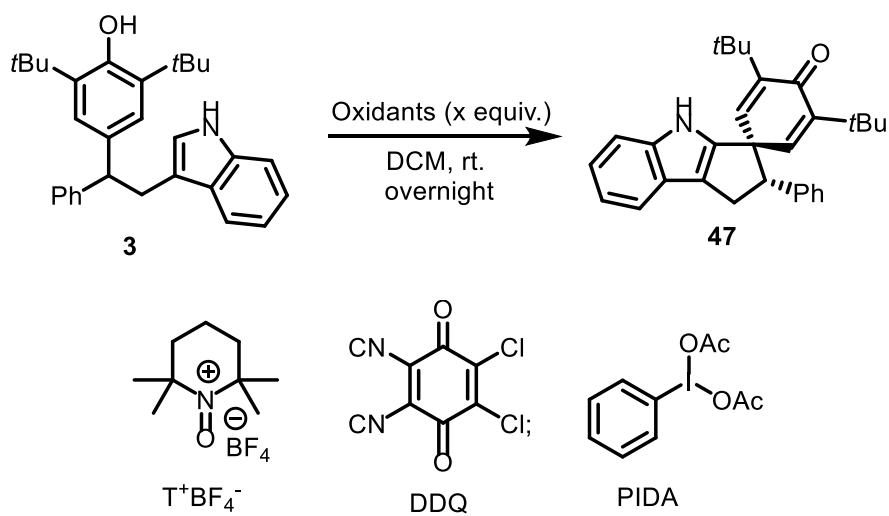

| Entry | Oxidant                   | Equiv. | Conversion of <b>3</b> | Yield of <b>47</b> |
|-------|---------------------------|--------|------------------------|--------------------|
| 1     | $\text{T}^+\text{BF}_4^-$ | 2      | 100%                   | N.D.               |
| 2     | DDQ                       | 2      | 0%                     | N.D.               |
| 3     | PIDA                      | 2      | 56%                    | Mess               |
| 4     | $\text{MnO}_2$            | 5      | 42%                    | <10%               |
| 5     | $\text{MnO}_2$            | 15     | 100%                   | 46%                |

## 6. Experimental Studies on the Reaction Mechanism

### 6.1 Trapping the diarylmethyl radical with O<sub>2</sub>

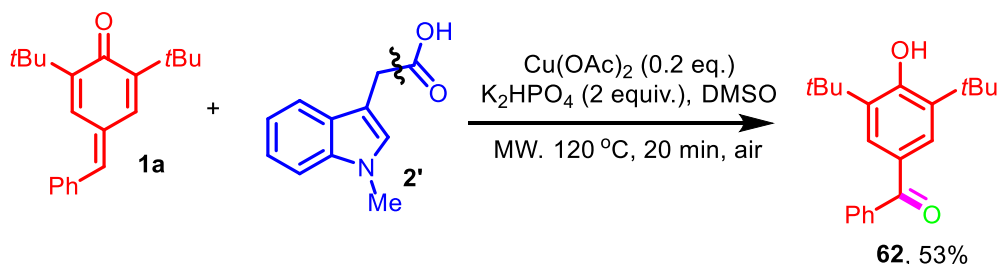

#### Experimental procedure:

In an oven-dried glass tubes *p*-QM **1a** (60 mg, 0.2 mmol, 1.0 eq.), 3-indoleacetic acids **2'** (57 mg, 0.3 mmol, 1.5 eq.), K<sub>2</sub>HPO<sub>4</sub> (70 mg, 0.4 mmol, 2.0 eq.), and Cu(OAc)<sub>2</sub> (8 mg, 0.04 mmol, 0.2 equiv.) were dissolved in DMSO (2 mL) and the reaction mixture was stirred at MW 120 °C for 20 min by microwave irradiation and monitored by TLC. Then the reaction mixture was concentrated under reduced pressure followed by column chromatography over silica gel using petroleum / EtOAc = 20/1 as eluent to afford the desired product **62** (33 mg, 53% yield).

### 6.2 Trapping the indole-3-methyl radical with O<sub>2</sub>

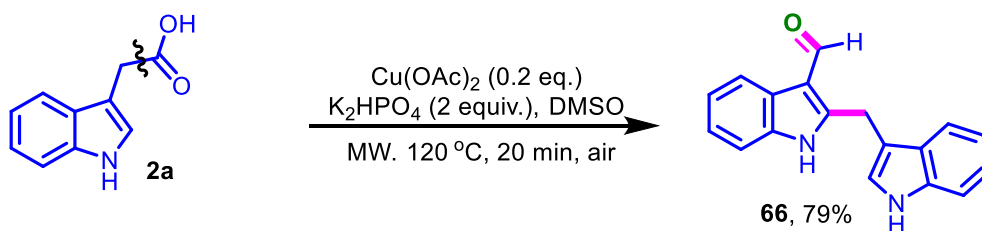

In an oven-dried glass tubes 3-indoleacetic acids **2a** (53 mg, 0.3 mmol, 1.5 eq.), K<sub>2</sub>HPO<sub>4</sub> (70 mg, 0.4 mmol, 2.0 eq.), and Cu(OAc)<sub>2</sub> (8 mg, 0.04 mmol, 0.2 equiv.) were dissolved in DMSO (2 mL) and the reaction mixture was stirred at MW 120 °C for 20 min by microwave irradiation and monitored by TLC. Then the reaction mixture was concentrated under reduced pressure followed by column chromatography over silica gel using petroleum / EtOAc = 10/3 as eluent to afford the desired product **66** (65 mg, 79% yield).

### 6.3 Control experiments

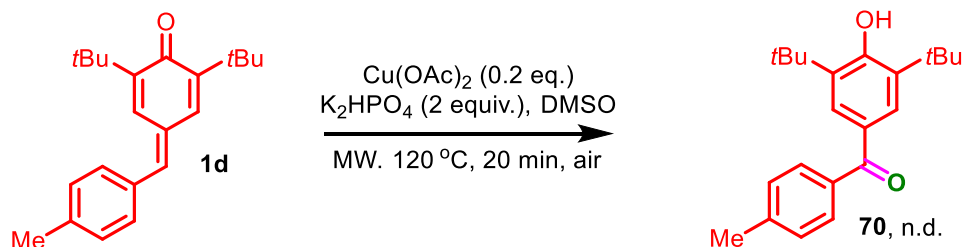

In an oven-dried glass tubes *p*-QM **1d** (62 mg, 0.2 mmol, 1.0 eq.), K<sub>2</sub>HPO<sub>4</sub> (70 mg, 0.4 mmol, 2.0 eq.), and Cu(OAc)<sub>2</sub> (8 mg, 0.04 mmol, 0.2 equiv.) were dissolved in DMSO (2 mL) and the reaction mixture was stirred at MW 120 °C for 20 min by microwave irradiation and monitored by TLC. No

diarylmethane radical O<sub>2</sub>-adduct **70** was generated.

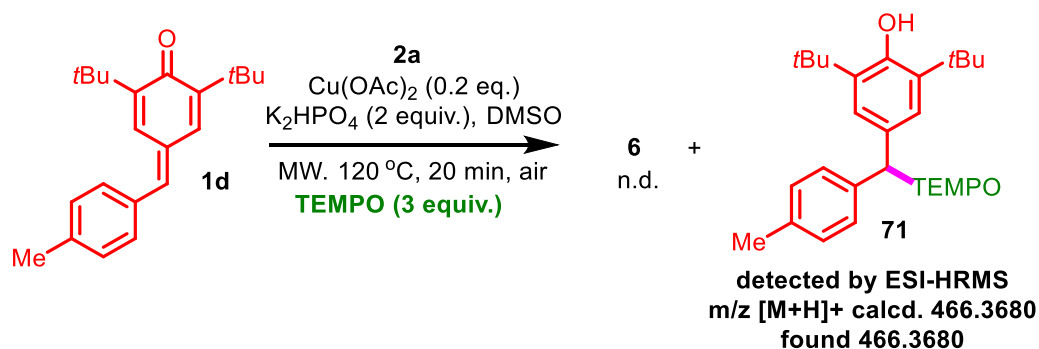

In an oven-dried glass tubes *p*-QM **1d** (62 mg, 0.2 mmol, 1.0 eq.), 3-indoleacetic acids **2a** (53 mg, 0.3 mmol, 1.5 eq.), K<sub>2</sub>HPO<sub>4</sub> (70 mg, 0.4 mmol, 2.0 eq.), TEMPO (94 mg, 0.6 mmol, 3 eq.), and Cu(OAc)<sub>2</sub> (8 mg, 0.04 mmol, 0.2 equiv.) were dissolved in DMSO (2 mL) and the reaction mixture was stirred at MW 120°C for 20 min. After which, the ESI-MS analysis of the crude reaction mixture was carried out. The mass for diarylmethyl radical trapping product **71** could be detected. The mass for **71** is C<sub>31</sub>H<sub>48</sub>NO<sub>2</sub><sup>+</sup> [M+H]<sup>+</sup> calcd. 466.3680, found 466.3680.

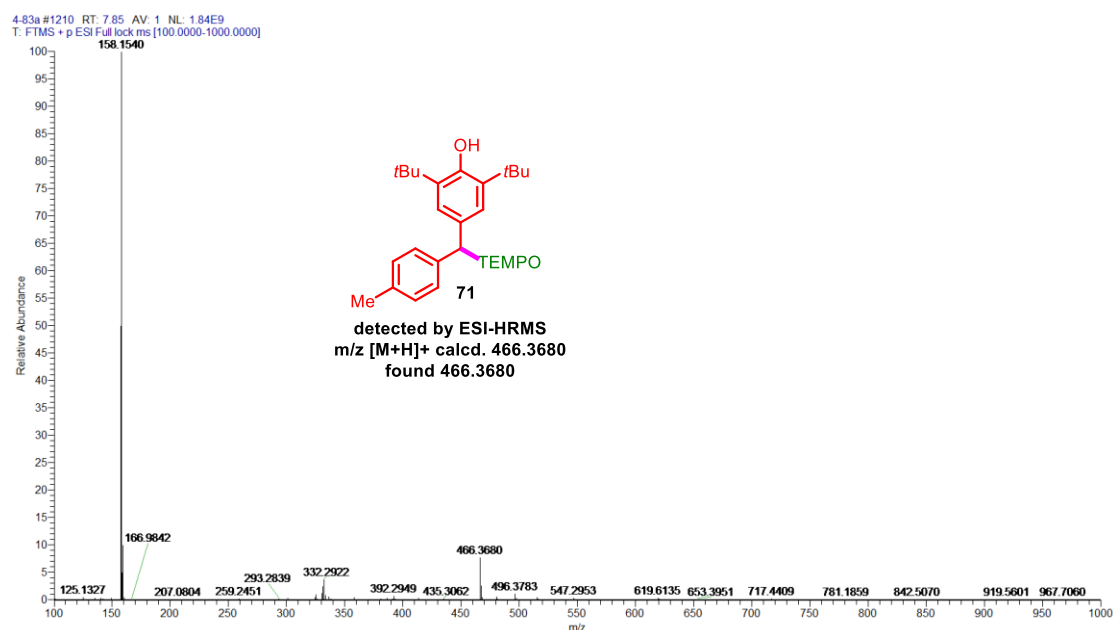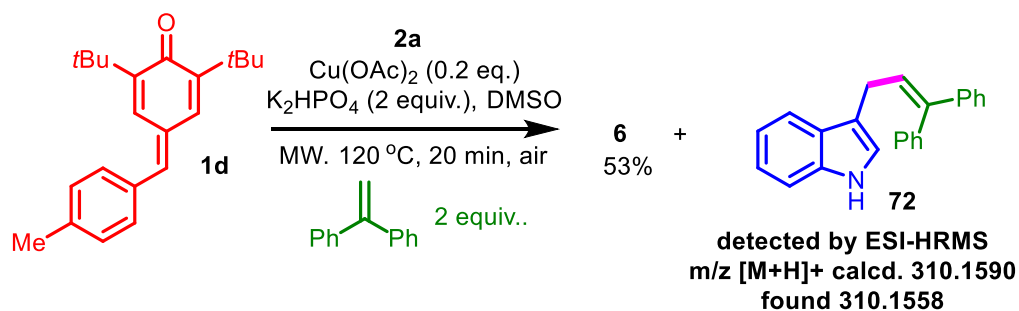

In an oven-dried glass tubes *p*-QM **1d** (62 mg, 0.2 mmol, 1.0 eq.), 3-indoleacetic acids **2a** (53 mg, 0.3



mmol, 1.5 eq.),  $K_2HPO_4$  (70 mg, 0.4 mmol, 2.0 eq.), 1,1-diphenylethylene (71  $\mu$ L, 0.4 mmol, 2 eq.), and  $Cu(OAc)_2$  (8 mg, 0.04 mmol, 0.2 equiv.) were dissolved in DMSO (2 mL) and the reaction mixture was stirred at **MW** 120 °C for 20 min. After which, the ESI-MS analysis of the crude reaction mixture was carried out. The mass for indole-3-methyl radical trapping product **72** could be detected. The mass for **72** is  $C_{23}H_{20}N^+$   $[M+H]^+$  calcd. 310.1590, found 310.1558. Then the reaction residue was extracted using EtOAc/ $H_2O$  and concentrated under reduced pressure followed by column chromatography over silica gel using petroleum / EtOAc = 20/1 as eluent to afford the desired product **6** (46 mg, 53% yield).

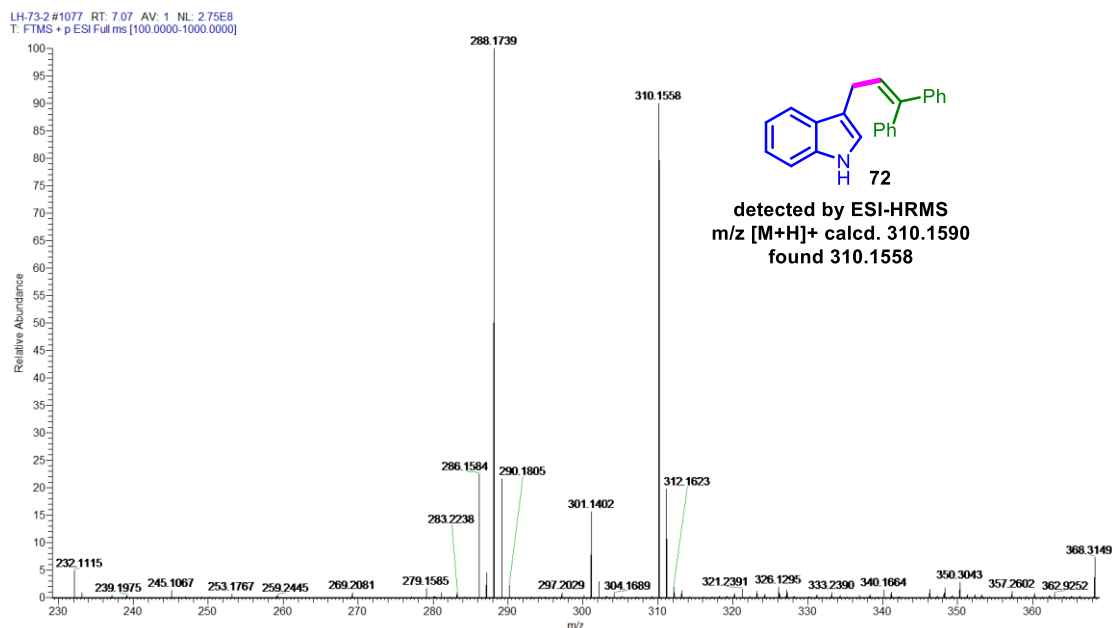

## 7. Characterization data of compounds

### 4-(2-(1H-indol-3-yl)-1-phenylethyl)-2,6-di-tert-butylphenol (**3**)

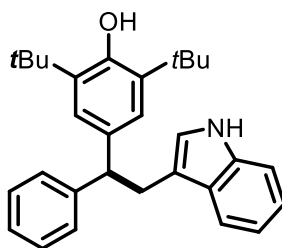

Yellow solid, m. p. 149-153 °C, 79 mg, 93% yield,  $R_f$  = 0.3 (ethyl acetate/hexane = 5%);  $^1H$  NMR (400 MHz,  $CDCl_3$ )  $\delta$  7.65 (s, 1H), 7.43 (d,  $J$  = 7.8 Hz, 1H), 7.26 – 7.14 (m, 5H), 7.08 (ddd,  $J$  = 7.8, 5.4, 2.3 Hz, 2H), 7.04 – 6.97 (m, 1H), 6.96 (s, 2H), 6.46 (d,  $J$  = 2.1 Hz, 1H), 4.95 (s, 1H), 4.19 (t,  $J$  = 7.7 Hz, 1H), 3.54 – 3.11 (m, 2H), 1.29 (s, 18H) ppm;  $^{13}C$  NMR (100 MHz,  $CDCl_3$ )  $\delta$  152.0, 145.4, 135.9, 135.8, 135.4, 128.2, 128.2, 127.8, 125.9, 124.5, 122.2, 121.7, 119.1, 118.8, 115.0, 110.9, 51.8, 34.4, 32.3, 30.4 ppm; **HRMS (ESI)**  $m/z$  calcd for  $C_{30}H_{36}NO^+$   $(M+H)^+$  426.2791, found  $m/z$  426.2790.

### 4-(2-(1H-indol-3-yl)-1-(o-tolyl)ethyl)-2,6-di-tert-butylphenol (**4**)

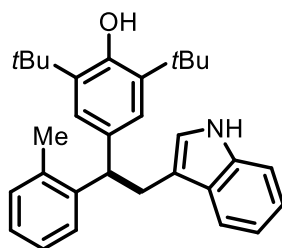

Colorless oil, 80 mg, 91% yield,  $R_f = 0.3$  (ethyl acetate/hexane = 5%);  $^1\text{H NMR}$  (400 MHz,  $\text{CDCl}_3$ )  $\delta$  7.74 (s, 1H), 7.47 (dd,  $J = 10.6, 7.9$  Hz, 2H), 7.28 (d,  $J = 8.1$  Hz, 1H), 7.20 (t,  $J = 5.6$  Hz, 1H), 7.13 (dd,  $J = 13.4, 5.9$  Hz, 1H), 7.06 (dt,  $J = 15.7, 5.4$  Hz, 3H), 6.95 (s, 2H), 6.52 (d,  $J = 1.8$  Hz, 1H), 4.98 (s, 1H), 4.44 (t,  $J = 7.6$  Hz, 1H), 3.69 – 3.22 (m, 2H), 2.16 (s, 3H), 1.34 (s, 18H) ppm;  $^{13}\text{C NMR}$  (100 MHz,  $\text{CDCl}_3$ )  $\delta$  151.8, 143.4, 136.4, 135.9, 135.3, 135.2, 130.3, 127.9, 126.7, 125.9, 125.7, 124.7, 122.1, 121.7, 119.1, 118.8, 115.1, 110.9, 47.2, 34.3, 32.4, 30.3, 20.0 ppm; **HRMS (ESI)**  $m/z$  calcd for  $\text{C}_{31}\text{H}_{38}\text{NO}^+$  ( $\text{M}+\text{H}$ ) $^+$  440.2948, found  $m/z$  440.2950.

**4-(2-(1H-indol-3-yl)-1-(m-tolyl)ethyl)-2,6-di-tert-butylphenol (5)**

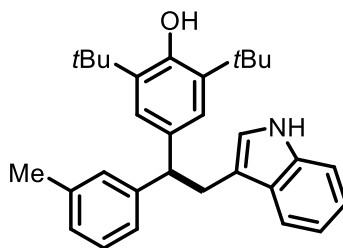

Yellow solid, m. p. 139-142 °C, 79 mg, 90% yield,  $R_f = 0.3$  (ethyl acetate/hexane = 5%);  $^1\text{H NMR}$  (400 MHz,  $\text{CDCl}_3$ )  $\delta$  7.56 (s, 1H), 7.41 (d,  $J = 7.7$  Hz, 1H), 7.15 (d,  $J = 7.9$  Hz, 1H), 7.12 – 6.97 (m, 5H), 6.95 (s, 2H), 6.89 (d,  $J = 6.8$  Hz, 1H), 6.43 (s, 1H), 4.92 (s, 1H), 4.13 (t,  $J = 7.6$  Hz, 1H), 3.35 (qd,  $J = 14.7, 7.7$  Hz, 2H), 2.20 (s, 3H), 1.28 (s, 18H) ppm;  $^{13}\text{C NMR}$  (100 MHz,  $\text{CDCl}_3$ )  $\delta$  152.0, 145.4, 137.7, 136.0, 135.9, 135.4, 129.2, 128.2, 127.8, 126.7, 125.0, 124.5, 122.3, 121.7, 119.1, 118.9, 115.1, 110.9, 51.9, 34.4, 32.4, 30.4, 21.6 ppm; **HRMS (ESI)**  $m/z$  calcd for  $\text{C}_{31}\text{H}_{38}\text{NO}^+$  ( $\text{M}+\text{H}$ ) $^+$  440.2948, found  $m/z$  440.2951.

**4-(2-(1H-indol-3-yl)-1-(p-tolyl)ethyl)-2,6-di-tert-butylphenol (6)**

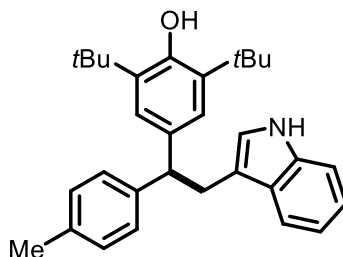

Yellow solid, m. p. 146-148 °C, 84 mg, 96% yield,  $R_f = 0.3$  (ethyl acetate/hexane = 5%);  $^1\text{H NMR}$  (400 MHz,  $\text{CDCl}_3$ )  $\delta$  7.70 (s, 1H), 7.63 (d,  $J = 7.6$  Hz, 1H), 7.37 – 7.22 (m, 4H), 7.20 – 7.13 (m, 5H), 6.61 (d,  $J = 1.3$  Hz, 1H), 5.11 (d,  $J = 5.5$  Hz, 1H), 4.34 (t,  $J = 7.5$  Hz, 1H), 3.70 – 3.40 (m, 2H), 2.40 (s, 3H),

1.49 (s, 18H) ppm;  $^{13}\text{C}$  NMR (100 MHz,  $\text{CDCl}_3$ )  $\delta$  152.0, 142.5, 136.2, 135.9, 135.5, 135.3, 129.0, 128.0, 127.9, 124.5, 122.3, 121.7, 119.1, 118.9, 115.0, 111.0, 51.5, 34.4, 32.4, 30.4, 21.1 ppm; HRMS (ESI)  $m/z$  calcd for  $\text{C}_{31}\text{H}_{38}\text{NO}^+$  ( $\text{M}+\text{H}$ ) $^+$  440.2948, found  $m/z$  440.2956.

**4-(2-(1H-indol-3-yl)-1-(2-methoxyphenyl)ethyl)-2,6-di-tert-butylphenol (7)**

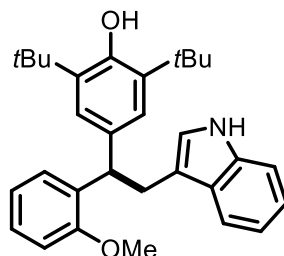

Yellow solid, m. p. 153-156 °C, 78 mg, 86% yield,  $R_f$  = 0.3 (ethyl acetate/hexane = 10%);  $^1\text{H}$  NMR (400 MHz,  $\text{CDCl}_3$ )  $\delta$  7.58 (s, 1H), 7.50 (d,  $J$  = 7.7 Hz, 1H), 7.23 (d,  $J$  = 7.3 Hz, 1H), 7.15 (d,  $J$  = 7.8 Hz, 1H), 7.05 (dd,  $J$  = 13.2, 6.0 Hz, 4H), 7.01 – 6.96 (m, 1H), 6.82 (t,  $J$  = 7.4 Hz, 1H), 6.72 (d,  $J$  = 8.2 Hz, 1H), 6.51 (s, 1H), 4.90 (s, 1H), 4.70 (t,  $J$  = 7.8 Hz, 1H), 3.62 (s, 3H), 3.35 (ddd,  $J$  = 39.1, 14.8, 7.8 Hz, 2H), 1.29 (s, 18H).

ppm;  $^{13}\text{C}$  NMR (100 MHz,  $\text{CDCl}_3$ )  $\delta$  157.1, 151.8, 135.9, 135.3, 135.1, 134.2, 128.0, 128.0, 126.8, 124.9, 122.0, 121.6, 120.5, 119.0, 119.0, 115.4, 110.8, 110.7, 55.4, 43.7, 34.4, 31.1, 30.4 ppm; HRMS (ESI)  $m/z$  calcd for  $\text{C}_{31}\text{H}_{38}\text{NO}_2^+$  ( $\text{M}+\text{H}$ ) $^+$  456.2897, found  $m/z$  456.2896.

**4-(2-(1H-indol-3-yl)-1-(4-methoxyphenyl)ethyl)-2,6-di-tert-butylphenol (8)**

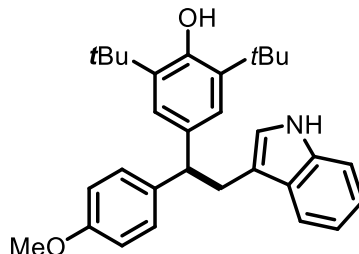

Yellow solid, m. p. 165-169 °C, 75 mg, 82% yield,  $R_f$  = 0.2 (ethyl acetate/hexane = 10%);  $^1\text{H}$  NMR (400 MHz,  $\text{CDCl}_3$ )  $\delta$  7.65 (s, 1H), 7.43 (d,  $J$  = 7.8 Hz, 1H), 7.19 (d,  $J$  = 7.9 Hz, 1H), 7.10 (d,  $J$  = 8.6 Hz, 2H), 7.05 (d,  $J$  = 7.8 Hz, 1H), 6.99 (t,  $J$  = 7.5 Hz, 1H), 6.94 (s, 2H), 6.72 (d,  $J$  = 8.6 Hz, 2H), 6.46 (d,  $J$  = 1.7 Hz, 1H), 4.93 (s, 1H), 4.14 (t,  $J$  = 7.6 Hz, 1H), 3.68 (s, 3H), 3.34 (d,  $J$  = 7.7 Hz, 2H), 1.29 (s, 18H) ppm;  $^{13}\text{C}$  NMR (100 MHz,  $\text{CDCl}_3$ )  $\delta$  157.8, 151.9, 137.7, 136.23, 136.0, 135.5, 129.0, 127.8, 124.4, 122.3, 121.7, 119.1, 118.8, 115.1, 113.6, 110.9, 55.2, 50.9, 34.4, 32.6, 30.4 ppm; HRMS (ESI)  $m/z$  calcd for  $\text{C}_{31}\text{H}_{38}\text{NO}_2^+$  ( $\text{M}+\text{H}$ ) $^+$  456.2897, found  $m/z$  456.2897.

**2,6-di-tert-butyl-4-(1-(4-(tert-butyl)phenyl)-2-(1H-indol-3-yl)ethyl)phenol (9)**

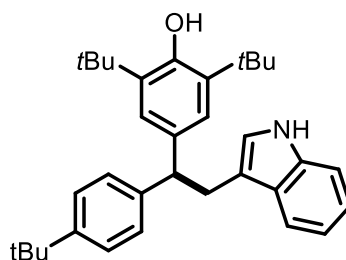

Yellow solid, m. p. 171-173 °C, 89 mg, 92% yield, R<sub>f</sub> = 0.3 (ethyl acetate/hexane = 5%); <sup>1</sup>H NMR (400 MHz, CDCl<sub>3</sub>) δ

7.59 (s, 1H), 7.38 (d, *J* = 7.8 Hz, 1H), 7.23 – 7.11 (m, 5H), 7.04 (dd, *J* = 11.1, 4.0 Hz, 1H), 7.02 – 6.92 (m, 3H), 6.45 (s, 1H), 4.92 (s, 1H), 4.13 (t, *J* = 7.6 Hz, 1H), 3.36 (qd, *J* = 14.7, 7.8 Hz, 2H), 1.29 (s, 18H), 1.21 (s, 9H) ppm; <sup>13</sup>C NMR (100 MHz, CDCl<sub>3</sub>) δ 152.08, 148.6, 142.5, 136.0, 135.9, 135.4, 127.9, 127.6, 125.2, 124.6, 122.3, 121.7, 119.1, 118.9, 115.2, 110.9, 51.5, 34.4, 32.5, 31.5, 30.4 ppm; HRMS (ESI) *m/z* calcd for C<sub>34</sub>H<sub>44</sub>NO<sup>+</sup> (M+H)<sup>+</sup> 482.3417, found *m/z* 482.3417.

**2,6-di-tert-butyl-4-(1-(4-(dimethylamino)phenyl)-2-(1H-indol-3-yl)ethyl)phenol (10)**

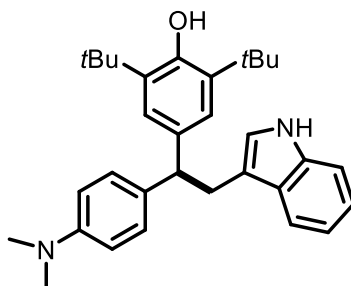

Brown solid, m. p. 182-185 °C, 81 mg, 86% yield, R<sub>f</sub> = 0.2 (ethyl acetate/hexane = 15%); <sup>1</sup>H NMR (400 MHz, CDCl<sub>3</sub>) δ 7.63 (s, 1H), 7.44 (d, *J* = 7.8 Hz, 1H), 7.18 (d, *J* = 8.1 Hz, 1H), 7.06 (dd, *J* = 11.4, 8.1 Hz, 3H), 6.99 (d, *J* = 7.1 Hz, 1H), 6.96 (s, 2H), 6.59 (d, *J* = 8.7 Hz, 2H), 6.45 (d, *J* = 2.0 Hz, 1H), 4.91 (s, 1H), 4.09 (t, *J* = 7.6 Hz, 1H), 3.33 (t, *J* = 8.1 Hz, 2H), 2.81 (s, 6H), 1.29 (s, 18H) ppm; <sup>13</sup>C NMR (100 MHz, CDCl<sub>3</sub>) δ 151.8, 149.0, 136.6, 135.9, 135.3, 133.9, 128.7, 127.9, 124.4, 122.3, 121.6, 119.0, 118.9, 115.3, 112.9, 110.9, 50.9, 40.9, 34.4, 32.5, 30.4 ppm; HRMS (ESI) *m/z* calcd for C<sub>32</sub>H<sub>41</sub>N<sub>2</sub>O<sup>+</sup> (M+H)<sup>+</sup> 469.3213, found *m/z* 469.3211.

**2,6-di-tert-butyl-4-(1-(3,4-dimethylphenyl)-2-(1H-indol-3-yl)ethyl)phenol (11)**

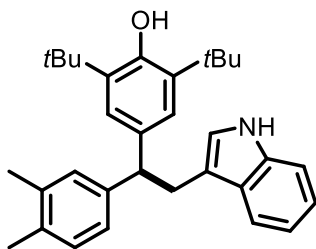

Slight yellow solid, m. p. 135-137 °C, 81 mg, 89% yield, R<sub>f</sub> = 0.3 (ethyl acetate/hexane = 5%); <sup>1</sup>H NMR (400 MHz, CDCl<sub>3</sub>) 7.51 (s, 1H), 7.41 (d, *J* = 7.7 Hz, 1H), 7.12 (d, *J* = 7.9 Hz, 1H), 7.03 (t, *J* = 7.3 Hz, 1H), 7.01 – 6.90 (m, 6H), 6.42 (s, 1H), 4.90 (s, 1H), 4.09 (t, *J* = 7.6 Hz, 1H), 3.34 (qd, *J* = 14.7, 7.7 Hz, 2H), 2.11 (s, 6H), 1.28 (s, 18H) ppm; <sup>13</sup>C NMR (100 MHz, CDCl<sub>3</sub>) δ 152.0, 143.0, 136.3, 136.2, 135.9, 135.4, 134.0, 129.7, 129.6, 127.9, 125.2, 124.5, 122.3, 121.7, 119.1, 118.9, 115.2, 111.0, 51.6, 34.4, 32.4, 30.4, 20.0, 19.5 ppm; HRMS (ESI) *m/z* calcd for C<sub>32</sub>H<sub>40</sub>NO<sup>+</sup> (M+H)<sup>+</sup> 454.3104, found *m/z* 454.3101.

**4-(2-(1H-indol-3-yl)-1-(3,4,5-trimethoxyphenyl)ethyl)-2,6-di-tert-butylphenol (12)**

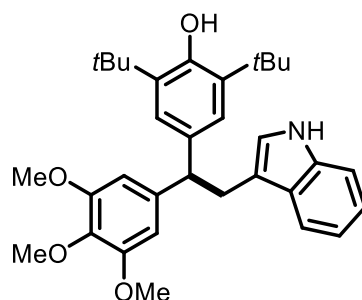

Slight yellow solid, m. p. 177-179 °C, 83 mg, 80% yield,  $R_f = 0.3$  (ethyl acetate/hexane = 20%);  $^1\text{H NMR}$  (400 MHz,  $\text{CDCl}_3$ )  $\delta$  8.01 (s, 1H), 7.55 (d,  $J = 7.8$  Hz, 1H), 7.34 (d,  $J = 7.9$  Hz, 1H), 7.24 – 7.18 (m, 1H), 7.17 – 7.09 (m, 3H), 6.65 (d,  $J = 2.1$  Hz, 1H), 6.55 (s, 2H), 5.13 (s, 1H), 4.23 (d,  $J = 7.6$  Hz, 1H), 3.88 (s, 3H), 3.81 (s, 6H), 3.48 (d,  $J = 7.6$  Hz, 2H), 1.46 (s, 18H);  $^{13}\text{C NMR}$  (100 MHz,  $\text{CDCl}_3$ )  $\delta$  152.9, 152.2, 141.2, 136.1, 136.0, 135.5, 135.5, 127.8, 124.4, 122.5, 121.7, 119.1, 118.8, 114.7, 111.1, 105.2, 60.9, 56.0, 52.4, 34.4, 32.9, 30.4 ppm; **HRMS (ESI)**  $m/z$  calcd for  $\text{C}_{33}\text{H}_{42}\text{NO}_4^+$  ( $\text{M}+\text{H}$ ) $^+$  516.3108, found  $m/z$  516.3110.

**2,6-di-tert-butyl-4-(1-(3-hydroxy-4-methoxyphenyl)-2-(1H-indol-3-yl)ethyl)phenol (13)**

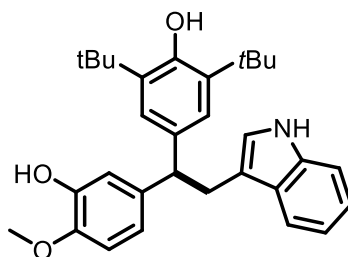

Yellow solid, m. p. 161-164 °C, 76 mg, 81% yield,  $R_f = 0.4$  (ethyl acetate/hexane = 20%);  $^1\text{H NMR}$  (400 MHz,  $\text{CDCl}_3$ )  $\delta$  7.71 (s, 1H), 7.43 (d,  $J = 7.8$  Hz, 1H), 7.22 (d,  $J = 8.1$  Hz, 1H), 7.07 (t,  $J = 7.2$  Hz, 1H), 7.00 (t,  $J = 7.2$  Hz, 1H), 6.96 (s, 2H), 6.78 – 6.68 (m, 2H), 6.63 (d,  $J = 1.3$  Hz, 1H), 6.50 (d,  $J = 2.1$  Hz, 1H), 5.37 (s, 1H), 4.95 (s, 1H), 4.11 (t,  $J = 7.7$  Hz, 1H), 3.67 (s, 3H), 3.33 (d,  $J = 7.6$  Hz, 2H), 1.30 (s, 18H) ppm;  $^{13}\text{C NMR}$  (100 MHz,  $\text{CDCl}_3$ )  $\delta$  152.0, 146.2, 143.7, 137.4, 136.0, 135.9, 135.4, 127.8, 124.4, 122.3, 121.7, 120.6, 119.1, 118.8, 115.0, 114.0, 111.1, 110.9, 55.8, 51.5, 34.4, 32.7, 30.4 ppm; **HRMS (ESI)**  $m/z$  calcd for  $\text{C}_{31}\text{H}_{38}\text{NO}_3^+$  ( $\text{M}+\text{H}$ ) $^+$  472.2846, found  $m/z$  472.2846.

**4-(2-(1H-indol-3-yl)-1-(4-(4,4,5,5-tetramethyl-1,3,2-dioxaborolan-2-yl)phenyl)ethyl)-2,6-di-tert-butylphenol (14)**

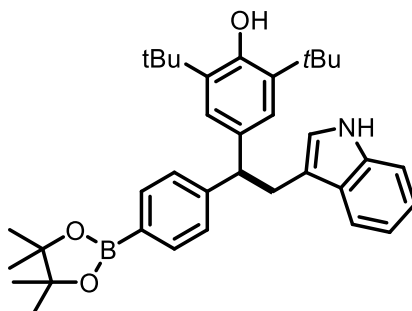

Slight yellow solid, m. p. 183-185 °C, 91 mg, 83% yield,  $R_f = 0.3$  (ethyl acetate/hexane = 10%);  $^1\text{H NMR}$  (400 MHz,  $\text{CDCl}_3$ )  $\delta$  7.68 (s, 1H), 7.62 (d,  $J = 7.8$  Hz, 2H), 7.44 (d,  $J = 7.7$  Hz, 1H), 7.21 (d,  $J =$

7.8 Hz, 2H), 7.17 (d,  $J = 7.9$  Hz, 1H), 7.05 (t,  $J = 7.3$  Hz, 1H), 6.99 (d,  $J = 7.2$  Hz, 1H), 6.96 (d,  $J = 3.7$  Hz, 2H), 6.43 (d,  $J = 1.7$  Hz, 1H), 4.93 (s, 1H), 4.19 (t,  $J = 7.6$  Hz, 1H), 3.50 – 3.22 (m, 2H), 1.28 (s, 18H), 1.24 (s, 12H) ppm;  $^{13}\text{C}$  NMR (100 MHz,  $\text{CDCl}_3$ )  $\delta$  152.0, 148.8, 135.9, 135.6, 135.5, 134.8, 127.8, 127.7, 124.5, 122.3, 121.7, 119.1, 118.8, 114.8, 111.0, 83.7, 52.0, 34.4, 32.1, 30.4, 24.9, 24.9 ppm; **HRMS (ESI)**  $m/z$  calcd for  $\text{C}_{36}\text{H}_{47}\text{BNO}_3^+$  ( $\text{M}+\text{H}$ ) $^+$  552.3644, found  $m/z$  552.3649.

**4-(1-([1,1'-biphenyl]-4-yl)-2-(1H-indol-3-yl)ethyl)-2,6-di-tert-butylphenol (15)**

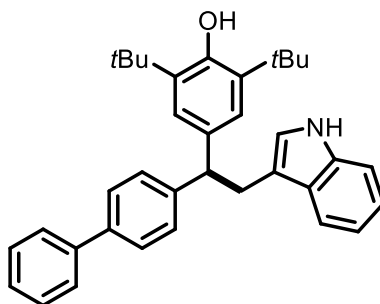

Slight yellow solid, m. p. 159-161 °C, 84 mg, 84% yield,  $R_f = 0.3$  (ethyl acetate/hexane = 5%);  $^1\text{H}$  NMR (400 MHz,  $\text{CDCl}_3$ )  $\delta$  7.58 (s, 1H), 7.51 – 7.38 (m, 5H), 7.31 (t,  $J = 7.5$  Hz, 2H), 7.28 – 7.14 (m, 4H), 7.06 (dd,  $J = 16.3, 9.3$  Hz, 1H), 7.02 – 6.95 (m, 3H), 6.46 (s, 1H), 4.95 (s, 1H), 4.22 (t,  $J = 7.6$  Hz, 1H), 3.39 (dd,  $J = 14.4, 7.7$  Hz, 2H), 1.29 (s, 18H) ppm;  $^{13}\text{C}$  NMR (100 MHz,  $\text{CDCl}_3$ )  $\delta$  152.1, 144.7, 141.1, 138.7, 136.0, 135.8, 135.6, 128.8, 128.6, 127.8, 127.1, 127.0, 127.0, 124.6, 122.4, 121.8, 119.2, 118.9, 114.9, 111.0, 51.6, 34.4, 32.4, 30.4 ppm; **HRMS (ESI)**  $m/z$  calcd for  $\text{C}_{36}\text{H}_{40}\text{NO}^+$  ( $\text{M}+\text{H}$ ) $^+$  502.3104, found  $m/z$  502.3108.

**4-(2-(1H-indol-3-yl)-1-(naphthalen-2-yl)ethyl)-2,6-di-tert-butylphenol (16)**

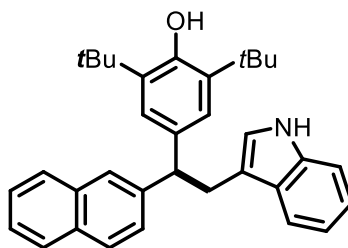

Yellow solid, m. p. 145-148 °C, 84 mg, 88% yield,  $R_f = 0.3$  (ethyl acetate/hexane = 5%);  $^1\text{H}$  NMR (400 MHz,  $\text{CDCl}_3$ )  $\delta$  7.90 – 7.74 (m, 4H), 7.65 (d,  $J = 6.6$  Hz, 2H), 7.56 – 7.45 (m, 3H), 7.37 – 7.27 (m, 1H), 7.26 – 7.03 (m, 4H), 6.56 (s, 1H), 5.12 (s, 1H), 4.52 (t,  $J = 7.3$  Hz, 1H), 3.98 – 3.19 (m, 2H), 1.46 (s, 18H) ppm;  $^{13}\text{C}$  NMR (100 MHz,  $\text{CDCl}_3$ )  $\delta$  152.1, 143.0, 136.0, 135.8, 135.6, 133.6, 132.2, 127.8, 127.8, 127.6, 127.1, 126.4, 125.8, 125.2, 124.6, 122.4, 121.8, 119.2, 118.8, 114.8, 111.0, 51.9, 34.4, 32.2, 30.4 ppm; **HRMS (ESI)**  $m/z$  calcd for  $\text{C}_{34}\text{H}_{38}\text{NO}^+$  ( $\text{M}+\text{H}$ ) $^+$  476.2948, found  $m/z$  476.2955.

**4-(2-(1H-indol-3-yl)-1-(pyren-1-yl)ethyl)-2,6-di-tert-butylphenol (17)**

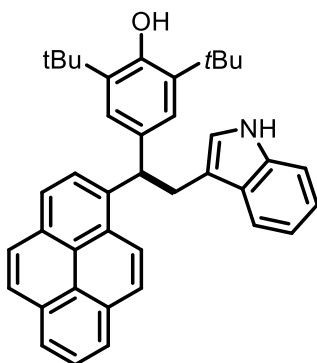

Yellow solid, m. p. 163-166 °C, 78 mg, 71% yield, R<sub>f</sub> = 0.3 (ethyl acetate/hexane = 10%); <sup>1</sup>H NMR (400 MHz, CDCl<sub>3</sub>) δ 8.26 (d, *J* = 9.4 Hz, 1H), 8.09 (s, 2H), 8.04 (dd, *J* = 13.2, 7.6 Hz, 2H), 7.97 – 7.91 (m, 2H), 7.88 (dd, *J* = 12.6, 5.1 Hz, 2H), 7.58 – 7.49 (m, 2H), 7.16 (t, *J* = 3.9 Hz, 1H), 7.10 – 6.96 (m, 4H), 6.33 (d, *J* = 1.5 Hz, 1H), 5.36 (t, *J* = 7.6 Hz, 1H), 4.92 (s, 1H), 3.79 – 3.55 (m, 2H), 1.25 (s, 18H) ppm; <sup>13</sup>C NMR (100 MHz, CDCl<sub>3</sub>) δ 152.0, 139.3, 135.9, 135.9, 135.5, 131.4, 130.8, 129.6, 129.0, 127.9, 127.6, 127.1, 126.7, 125.7, 125.1, 125.1, 125.0, 124.9, 124.8, 124.7, 124.6, 123.5, 122.2, 121.8, 119.2, 118.7, 114.95, 110.9, 46.5, 34.3, 32.8, 30.3 ppm; HRMS (ESI) *m/z* calcd for C<sub>40</sub>H<sub>40</sub>NO<sup>+</sup> (M+H)<sup>+</sup> 550.3104, found *m/z* 550.3102.

**2,6-di-tert-butyl-4-(1-(4-fluorophenyl)-2-(1H-indol-3-yl)ethyl)phenol (18)**

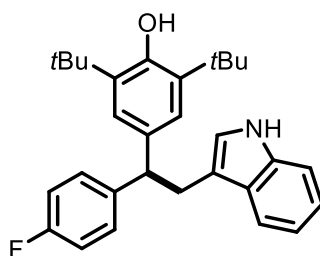

Slight yellow oil, m. p. 149-153 °C, 77 mg, 87% yield, R<sub>f</sub> = 0.3 (ethyl acetate/hexane = 5%); <sup>1</sup>H NMR (400 MHz, CDCl<sub>3</sub>) δ 7.70 (s, 1H), 7.42 (d, *J* = 7.8 Hz, 1H), 7.22 (d, *J* = 8.1 Hz, 1H), 7.10 (dt, *J* = 11.2, 6.8 Hz, 3H), 7.00 (t, *J* = 7.5 Hz, 1H), 6.93 (s, 2H), 6.85 (t, *J* = 8.7 Hz, 2H), 6.48 (d, *J* = 1.2 Hz, 1H), 4.97 (s, 1H), 4.18 (t, *J* = 7.7 Hz, 1H), 3.45 – 3.24 (m, 2H), 1.30 (s, 18H) ppm; <sup>13</sup>C NMR (100 MHz, CDCl<sub>3</sub>) δ 162.4, 160.0, 152.1, 141.0 (d, *J* = 2.9 Hz), 135.9, 135.7, 135.5, 129.5 (d, *J* = 7.7 Hz), 127.7, 124.4, 122.2, 121.8, 119.2, 118.8, 115.0, 114.8, 114.7, 111.0, 50.9, 34.4, 32.5, 30.3 ppm; <sup>19</sup>F NMR (376 MHz, CDCl<sub>3</sub>) δ -117.68 (dd, *J* = 9.9, 4.4 Hz, 1F) ppm; HRMS (ESI) *m/z* calcd for C<sub>30</sub>H<sub>35</sub>FNO<sup>+</sup> (M+H)<sup>+</sup> 444.2697, found *m/z* 444.2698.

**2,6-di-tert-butyl-4-(1-(4-chlorophenyl)-2-(1H-indol-3-yl)ethyl)phenol (19)**

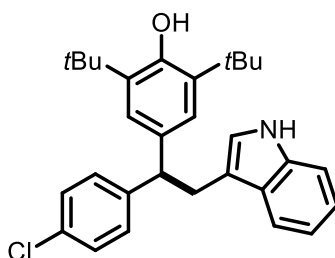

White solid, m. p. 151-153 °C, 85 mg, 92% yield, R<sub>f</sub> = 0.3 (ethyl acetate/hexane = 5%); <sup>1</sup>H NMR (400 MHz, CDCl<sub>3</sub>) δ 7.65 (s, 1H), 7.42 (d, *J* = 7.8 Hz, 1H), 7.19 (d, *J* = 8.1 Hz, 1H), 7.14 – 7.04 (m, 5H), 6.99 (t, *J* = 7.5 Hz, 1H), 6.93 (s, 2H), 6.45 (s, 1H), 4.97 (s, 1H), 4.16 (t, *J* = 7.6 Hz, 1H), 3.48 – 3.26 (m, 2H), 1.30 (s, 18H) ppm; <sup>13</sup>C NMR (100 MHz, CDCl<sub>3</sub>) δ 152.2, 143.9, 136.0, 135.6, 135.4, 131.5, 129.6, 128.3, 127.67, 124.4, 122.3, 121.9, 119.2, 118.8, 114.5, 111.0, 51.1, 34.4, 32.3, 30.4 ppm; HRMS (ESI) *m/z* calcd for C<sub>30</sub>H<sub>35</sub>ClNO<sup>+</sup> (M+H)<sup>+</sup> 460.2402, found *m/z* 460.2411.

**4-(1-(4-bromophenyl)-2-(1H-indol-3-yl)ethyl)-2,6-di-tert-butylphenol (20)**

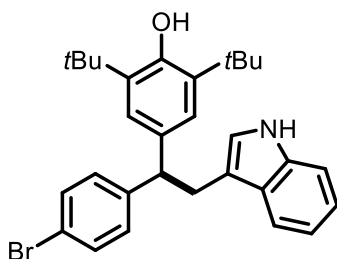

Yellow solid, m. p. 156-159 °C, 92 mg, 91% yield, R<sub>f</sub> = 0.3 (ethyl acetate/hexane = 5%); <sup>1</sup>H NMR (400 MHz, CDCl<sub>3</sub>) δ 7.63 (s, 1H), 7.42 (d, *J* = 7.8 Hz, 1H), 7.25 (d, *J* = 8.2 Hz, 2H), 7.18 (d, *J* = 7.9 Hz, 1H), 7.09 – 6.96 (m, 4H), 6.93 (s, 2H), 6.43 (s, 1H), 4.97 (s, 1H), 4.14 (t, *J* = 7.6 Hz, 1H), 3.43–3.21 (m, 2H), 1.29 (s, 18H) ppm; <sup>13</sup>C NMR (100 MHz, CDCl<sub>3</sub>) δ 151.0, 143.3, 134.8, 134.5, 134.1, 130.1, 128.8, 126.5, 123.2, 121.2, 120.7, 118.5, 118.1, 117.6, 113.3, 109.9, 50.0, 33.3, 31.1, 29.2 ppm; HRMS (ESI) *m/z* calcd for C<sub>30</sub>H<sub>35</sub>BrNO<sup>+</sup> (M+H)<sup>+</sup> 504.1897, found *m/z* 504.1898.

**4-(2-(1H-indol-3-yl)-1-(4-(trifluoromethyl)phenyl)ethyl)-2,6-di-tert-butylphenol (21)**

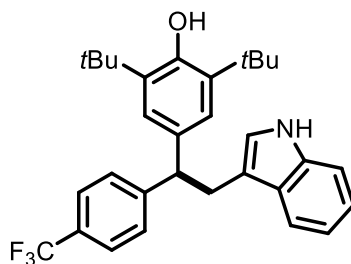

Slight yellow oil, 83 mg, 84% yield, R<sub>f</sub> = 0.3 (ethyl acetate/hexane = 5%); <sup>1</sup>H NMR (400 MHz, CDCl<sub>3</sub>) δ 7.65 (s, 1H), 7.40 (t, *J* = 8.0 Hz, 3H), 7.24 (d, *J* = 8.1 Hz, 2H), 7.19 (d, *J* = 7.9 Hz, 1H), 7.07 (t, *J* = 7.4 Hz, 1H), 6.99 (t, *J* = 7.4 Hz, 1H), 6.95 (s, 2H), 6.44 (d, *J* = 1.2 Hz, 1H), 4.99 (s, 1H), 4.24 (t, *J* = 7.6 Hz, 1H), 3.56 – 3.20 (m, 2H), 1.30 (s, 18H) ppm; <sup>13</sup>C NMR (100 MHz, CDCl<sub>3</sub>) δ 152.3, 149.6, 136.0, 135.8, 134.9, 128.4, 127.6, 125.5 (q, *J* = 219.4 Hz), 125.2 (q, *J* = 3.9 Hz), 124.4, 122.3, 121.9, 119.3, 118.7, 114.3, 111.1, 51.7, 34.4, 32.1, 30.3 ppm; <sup>19</sup>F NMR (376 MHz, CDCl<sub>3</sub>) δ -62.11 (s) ppm; HRMS (ESI) *m/z* calcd for C<sub>31</sub>H<sub>35</sub>F<sub>3</sub>NO<sup>+</sup> (M+Na)<sup>+</sup> 494.2665, found *m/z* 494.2665.

**4-(1-(3,5-di-tert-butyl-4-hydroxyphenyl)-2-(1H-indol-3-yl)ethyl)benzotrile (22)**



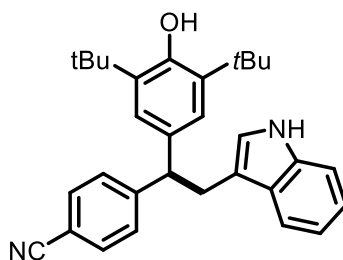

Yellow solid, m. p. 147-151 °C, 63 mg, 70% yield, Rf = 0.3 (ethyl acetate/hexane = 5%);  $^1\text{H NMR}$  (400 MHz,  $\text{CDCl}_3$ )  $\delta$  7.77 (s, 1H), 7.42 (t,  $J = 7.9$  Hz, 3H), 7.23 (t,  $J = 8.6$  Hz, 3H), 7.10 (t,  $J = 7.2$  Hz, 1H), 7.01 (t,  $J = 7.4$  Hz, 1H), 6.92 (s, 2H), 6.49 (d,  $J = 2.2$  Hz, 1H), 5.02 (s, 1H), 4.26 (dd,  $J = 9.0, 6.5$  Hz, 1H), 3.38 (qd,  $J = 14.5, 7.8$  Hz, 2H), 1.31 (s, 18H);  $^{13}\text{C NMR}$  (100 MHz,  $\text{CDCl}_3$ )  $\delta$  152.4, 151.1, 136.0, 135.9, 134.2, 132.0, 129.0, 127.5, 124.4, 122.2, 122.0, 119.3, 119.2, 118.6, 114.0, 111.1, 109.6, 51.8, 34.4, 32.0, 30.3 ppm; **HRMS (ESI)**  $m/z$  calcd for  $\text{C}_{31}\text{H}_{35}\text{N}_2\text{O}^+$  ( $\text{M}+\text{H}$ ) $^+$  451.2744, found  $m/z$  451.2752.

***methyl -4-(1-(3,5-di-tert-butyl-4-hydroxyphenyl)-2-(1H-indol-3-yl)ethyl)benzoate (23)***

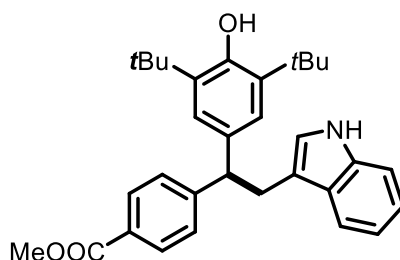

Yellow solid, m. p. 142-145 °C, 75 mg, 78% yield, Rf = 0.2 (ethyl acetate/hexane = 20%);  $^1\text{H NMR}$  (400 MHz,  $\text{CDCl}_3$ )  $\delta$  7.83 (d,  $J = 8.3$  Hz, 2H), 7.74 (s, 1H), 7.43 (d,  $J = 7.8$  Hz, 1H), 7.23 (d,  $J = 8.3$  Hz, 2H), 7.19 (d,  $J = 8.1$  Hz, 1H), 7.07 (dd,  $J = 11.0, 4.0$  Hz, 1H), 7.02 – 6.96 (m, 1H), 6.94 (s, 2H), 6.45 (d,  $J = 2.2$  Hz, 1H), 4.98 (s, 1H), 4.25 (t,  $J = 7.7$  Hz, 1H), 3.80 (d,  $J = 7.2$  Hz, 3H), 3.38 (d,  $J = 7.7$  Hz, 2H), 1.29 (s, 18H) ppm;  $^{13}\text{C NMR}$  (100 MHz,  $\text{CDCl}_3$ )  $\delta$  167.3, 152.2, 151.0, 136.0, 135.7, 135.0, 129.6, 128.3, 127.8, 127.7, 124.5, 122.3, 121.8, 119.2, 118.7, 114.4, 111.0, 52.0, 51.8, 34.4, 32.1, 30.3 ppm; **HRMS (ESI)**  $m/z$  calcd for  $\text{C}_{32}\text{H}_{38}\text{NO}_3^+$  ( $\text{M}+\text{H}$ ) $^+$  484.2846, found  $m/z$  484.2850.

***4-(2-(1H-indol-3-yl)-1-(thiophen-2-yl)ethyl)-2,6-di-tert-butylphenol (24)***

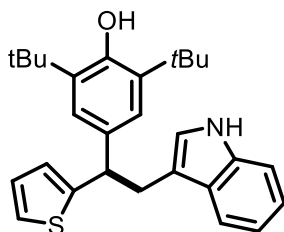

Yellow solid, m. p. 133-135 °C, 71 mg, 82% yield, Rf = 0.4 (ethyl acetate/hexane = 10%);  $^1\text{H NMR}$  (400 MHz,  $\text{CDCl}_3$ )  $\delta$  7.65 (s, 1H), 7.38 (d,  $J = 7.8$  Hz, 1H), 7.18 (d,  $J = 8.1$  Hz, 1H), 7.09 – 7.02 (m, 2H), 7.01 – 6.93 (m, 3H), 6.80 (dd,  $J = 5.1, 3.5$  Hz, 1H), 6.73 (d,  $J = 3.3$  Hz, 1H), 6.54 (d,  $J = 2.2$  Hz, 1H), 4.96 (s, 1H), 4.39 (t,  $J = 7.5$  Hz, 1H), 3.37 (ddd,  $J = 46.0, 14.5, 7.5$  Hz, 2H), 1.29 (s, 18H) ppm;  $^{13}\text{C NMR}$  (100 MHz,  $\text{CDCl}_3$ )  $\delta$  152.3, 149.8, 135.9, 135.6, 135.3, 127.8, 126.4, 124.4, 124.2, 123.3, 122.4,

121.8, 119.2, 118.8, 114.5, 111.0, 47.8, 34.5, 34.4, 30.4 ppm; **HRMS (ESI)**  $m/z$  calcd for  $C_{28}H_{34}NOS^+$   $(M+H)^+$  432.2356, found  $m/z$  432.2349.

**4-(1-(4-bromothiophen-2-yl)-2-(1H-indol-3-yl)ethyl)-2,6-di-tert-butylphenol (25)**

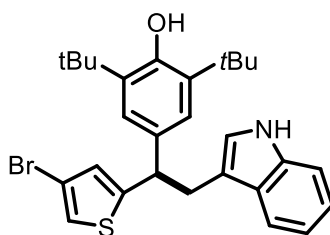

White solid, m. p. 139-142 °C, 82 mg, 80% yield,  $R_f = 0.4$  (ethyl acetate/hexane = 5%);  **$^1H$  NMR** (400 MHz,  $CDCl_3$ )  $\delta$

7.72 (s, 1H), 7.37 (d,  $J = 7.8$  Hz, 1H), 7.21 (d,  $J = 8.1$  Hz, 1H), 7.07 (t,  $J = 7.5$  Hz, 1H), 6.99 (t,  $J = 7.5$  Hz, 1H), 6.96 – 6.89 (m, 3H), 6.64 (s, 1H), 6.58 (d,  $J = 2.1$  Hz, 1H), 5.00 (s, 1H), 4.32 (t,  $J = 7.5$  Hz, 1H), 3.34 (ddd,  $J = 21.5, 14.5, 7.5$  Hz, 2H), 1.30 (s, 18H) ppm;  **$^{13}C$  NMR** (100 MHz,  $CDCl_3$ )  $\delta$  152.6, 151.2, 136.0, 135.8, 134.4, 127.6, 126.9, 124.3, 122.5, 121.9, 120.7, 119.3, 118.7, 114.0, 111.0, 108.8, 47.8, 34.4, 33.9, 30.3 ppm; **HRMS (ESI)**  $m/z$  calcd for  $C_{28}H_{33}BrNOS^+$   $(M+H)^+$  510.1461, found  $m/z$  510.1455.

**4-(2-(1H-indol-3-yl)-1-(5-methylfuran-2-yl)ethyl)-2,6-di-tert-butylphenol (26)**

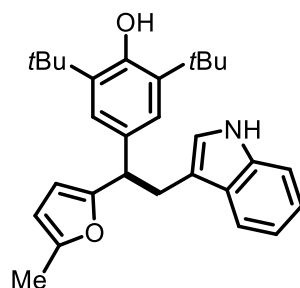

Yellow solid, m. p. 135-138 °C, 74 mg, 86% yield,  $R_f = 0.4$  (ethyl acetate/hexane = 5%);  **$^1H$  NMR** (400 MHz,  $CDCl_3$ )  $\delta$  7.73 (s, 1H), 7.34 (d,  $J = 7.8$  Hz, 1H), 7.21 (d,  $J = 8.1$  Hz, 1H), 7.06 (t,  $J = 7.5$  Hz, 1H), 6.96 (t,  $J = 7.4$  Hz, 1H), 6.89 (s, 2H), 6.58 (d,  $J = 2.2$  Hz, 1H), 5.88 (d,  $J = 3.1$  Hz, 1H), 5.78 (d,  $J = 2.1$  Hz, 1H), 4.94 (s, 1H), 4.09 (t,  $J = 7.6$  Hz, 1H), 3.41 (dd,  $J = 14.5, 7.9$  Hz, 1H), 3.13 (dd,  $J = 14.5, 7.4$  Hz, 1H), 2.19 (s, 3H), 1.27 (s, 18H) ppm;  **$^{13}C$  NMR** (100 MHz,  $CDCl_3$ )  $\delta$  156.3, 152.2, 150.4, 135.9, 135.4, 133.7, 127.8, 124.4, 122.2, 121.7, 119.1, 118.8, 114.6, 110.8, 106.3, 105.8, 46.2, 34.3, 31.7, 30.3, 13.7 ppm; **HRMS (ESI)**  $m/z$  calcd for  $C_{29}H_{36}NO_2^+$   $(M+H)^+$  430.2741, found  $m/z$  430.2744.

**4-(2-(1H-indol-3-yl)-1-(1-methyl-1H-imidazol-2-yl)ethyl)-2,6-di-tert-butylphenol (27)**

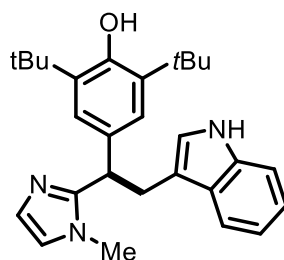

Slight yellow solid, m. p. 147-149 °C, 63 mg, 73% yield, Rf = 0.3 (ethyl acetate/hexane = 30%); <sup>1</sup>H NMR (400 MHz, CDCl<sub>3</sub>) δ 8.10 (s, 1H), 7.35 (d, *J* = 7.8 Hz, 1H), 7.22 (d, *J* = 8.1 Hz, 1H), 7.05 (dd, *J* = 11.1, 3.9 Hz, 1H), 6.99 – 6.93 (m, 2H), 6.84 (s, 2H), 6.62 (dd, *J* = 5.4, 1.5 Hz, 2H), 4.97 (s, 1H), 4.09 (t, *J* = 7.5 Hz, 1H), 3.71 (dd, *J* = 14.2, 8.1 Hz, 1H), 3.29 (dd, *J* = 14.3, 7.0 Hz, 1H), 3.17 (s, 3H), 1.25 (s, 18H) ppm; <sup>13</sup>C NMR (100 MHz, CDCl<sub>3</sub>) δ 152.4, 150.1, 136.0, 135.7, 132.6, 127.7, 126.8, 124.4, 122.8, 121.5, 120.4, 119.1, 118.6, 114.4, 111.0, 44.7, 34.3, 32.6, 32.1, 30.3 ppm; HRMS (ESI) *m/z* calcd for C<sub>28</sub>H<sub>36</sub>N<sub>3</sub>O<sup>+</sup> (M+H)<sup>+</sup> 430.2853, found *m/z* 430.2851.

**4-(2-(1H-indol-3-yl)-1-(pyridin-3-yl)ethyl)-2,6-di-tert-butylphenol (28)**

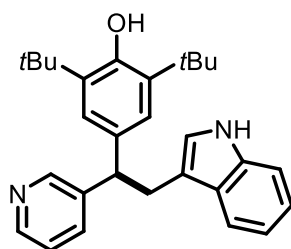

Yellow solid, m. p. 146-148 °C, 68 mg, 80% yield, Rf = 0.4 (ethyl acetate/hexane = 20%); <sup>1</sup>H NMR (400 MHz, CDCl<sub>3</sub>) δ 8.37 (s, 1H), 8.30 (d, *J* = 4.3 Hz, 1H), 7.98 (s, 1H), 7.43 (d, *J* = 7.7 Hz, 2H), 7.21 (d, *J* = 7.9 Hz, 1H), 7.08 (t, *J* = 6.7 Hz, 2H), 7.01 (d, *J* = 7.6 Hz, 1H), 6.97 (s, 2H), 6.50 (s, 1H), 5.05 (s, 1H), 4.60 – 3.93 (m, 1H), 3.39 (qd, *J* = 14.5, 7.9 Hz, 2H), 1.31 (s, 18H) ppm; <sup>13</sup>C NMR (100 MHz, CDCl<sub>3</sub>) δ 152.3, 149.8, 147.2, 140.7, 136.1, 135.9, 135.5, 134.5, 127.5, 124.4, 123.3, 122.4, 121.9, 119.2, 118.9, 114.0, 111.1, 49.3, 34.4, 32.1, 30.3 ppm; HRMS (ESI) *m/z* calcd for C<sub>29</sub>H<sub>35</sub>N<sub>2</sub>O<sup>+</sup> (M+H)<sup>+</sup> 427.2744, found *m/z* 427.2745.

**4-(2-(1H-indol-3-yl)-1-phenylethyl)-2-(tert-butyl)-6-methylphenol (29)**

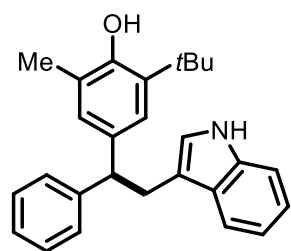

Slight yellow oil, m. p. 135-138 °C, 62 mg, 81% yield, Rf = 0.3 (ethyl acetate/hexane = 5%); <sup>1</sup>H NMR (400 MHz, CDCl<sub>3</sub>) δ 7.58 (s, 1H), 7.48 (d, *J* = 7.8 Hz, 1H), 7.17 (dd, *J* = 5.5, 2.7 Hz, 5H), 7.10 – 7.04 (m, 2H), 7.01 (dd, *J* = 10.9, 4.0 Hz, 1H), 6.96 (d, *J* = 1.8 Hz, 1H), 6.79 (d, *J* = 1.7 Hz, 1H), 6.44 (d, *J* = 2.0 Hz, 1H), 4.51 (s, 1H), 4.18 (t, *J* = 7.7 Hz, 1H), 3.50 – 3.30 (m, 2H), 2.06 (s, 3H), 1.27 (s, 9H); <sup>13</sup>C NMR (100 MHz, CDCl<sub>3</sub>) δ 150.9, 145.6, 136.4, 136.0, 135.3, 128.3, 128.1, 127.8, 127.7, 126.0, 124.9, 122.8, 122.3, 121.8, 119.2, 118.8, 114.8, 111.0, 51.2, 34.6, 32.1, 29.8, 16.2 ppm; HRMS (ESI) *m/z* calcd for C<sub>27</sub>H<sub>30</sub>NO<sup>+</sup> (M+H)<sup>+</sup> 384.2322, found *m/z* 384.2322.

**2,6-di-tert-butyl-4-(2-(5-methyl-1H-indol-3-yl)-1-phenylethyl)phenol (30)**

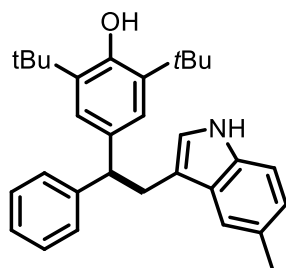

White solid, m. p. 151-153 °C, 79 mg, 90% yield, Rf = 0.3 (ethyl acetate/hexane = 5%);  $^1\text{H NMR}$  (400 MHz,  $\text{CDCl}_3$ )  $\delta$

7.46 (s, 1H), 7.23 – 7.17 (m, 3H), 7.11 (s, 1H), 7.06 (ddd,  $J = 16.1, 7.4, 3.8$  Hz, 1H), 6.95 (d,  $J = 9.0$  Hz, 2H), 6.86 (d,  $J = 8.2$  Hz, 2H), 6.39 (s, 1H), 4.94 (d,  $J = 8.7$  Hz, 1H), 4.14 (t,  $J = 7.6$  Hz, 1H), 3.33 (dd,  $J = 7.5, 3.2$  Hz, 2H), 2.32 (s, 3H), 1.28 (s, 18H) ppm;  $^{13}\text{C NMR}$  (100 MHz,  $\text{CDCl}_3$ )  $\delta$  152.0, 145.7, 136.0, 135.5, 134.3, 128.2, 128.1, 125.9, 124.6, 123.3, 122.4, 118.6, 114.5, 110.6, 52.0, 34.4, 32.4, 30.4, 21.6 ppm;  $^1\text{HRMS (ESI)}$   $m/z$  calcd for  $\text{C}_{31}\text{H}_{38}\text{NO}^+$  ( $\text{M}+\text{H}$ ) $^+$  440.2948, found  $m/z$  440.2949.

**2,6-di-tert-butyl-4-(2-(5-methoxy-1H-indol-3-yl)-1-phenylethyl)phenol (31)**

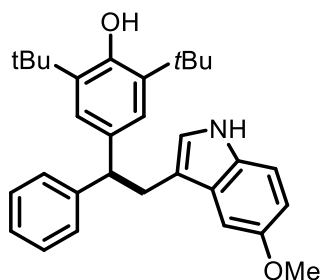

Yellow solid, m. p. 145-147 °C, 84 mg, 92% yield, Rf = 0.3 (ethyl acetate/hexane = 10%);  $^1\text{H NMR}$  (400 MHz,  $\text{CDCl}_3$ )  $\delta$  7.69 (s, 1H), 7.39 – 7.31 (m, 4H), 7.23 (dd,  $J = 14.2, 7.8$  Hz, 2H), 7.12 (s, 2H), 6.59 (d,  $J = 2.2$  Hz, 1H), 5.11 (s, 1H), 4.32 (t,  $J = 7.6$  Hz, 1H), 3.87 (s, 3H), 3.63 – 3.23 (m, 2H), 1.45 (s, 18H) ppm;  $^{13}\text{C NMR}$  (100 MHz,  $\text{CDCl}_3$ )  $\delta$  153.8, 152.0, 145.5, 136.0, 135.5, 131.1, 128.3, 128.2, 128.2, 126.0, 124.6, 123.2, 114.8, 112.0, 111.7, 100.7, 55.9, 51.9, 34.5, 34.4, 32.5, 30.4 ppm;  $^1\text{HRMS (ESI)}$   $m/z$  calcd for  $\text{C}_{31}\text{H}_{38}\text{NO}_2^+$  ( $\text{M}+\text{H}$ ) $^+$  456.2897, found  $m/z$  456.2894.

**4-(2-(5-(benzyloxy)-1H-indol-3-yl)-1-phenylethyl)-2,6-di-tert-butylphenol (32)**

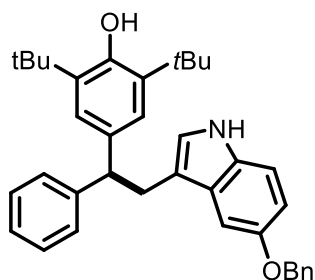

Yellow solid, m. p. 154-157 °C, 93 mg, 88% yield, Rf = 0.4 (ethyl acetate/hexane = 10%);  $^1\text{H NMR}$  (400 MHz,  $\text{CDCl}_3$ )  $\delta$  7.49 (s, 1H), 7.38 (d,  $J = 7.1$  Hz, 2H), 7.28 (t,  $J = 7.3$  Hz, 2H), 7.22 (d,  $J = 7.2$  Hz, 1H), 7.20 – 7.11 (m, 4H), 7.11 – 7.04 (m, 1H), 7.02 (d,  $J = 8.8$  Hz, 1H), 6.93 (s, 2H), 6.86 (d,  $J = 2.3$  Hz, 1H), 6.78 (dd,  $J = 8.7, 2.3$  Hz, 1H), 6.41 (d,  $J = 2.2$  Hz, 1H), 4.93 (s, 3H), 4.13 (t,  $J = 7.6$  Hz, 1H), 3.46 – 3.02 (m, 2H), 1.27 (s, 18H) ppm;  $^{13}\text{C NMR}$  (100 MHz,  $\text{CDCl}_3$ )  $\delta$  153.1, 152.0, 145.6, 137.8, 135.9, 135.5, 131.4, 128.5, 128.3, 128.2, 127.8, 127.7, 126.0, 124.6, 123.2, 114.8, 112.7, 111.6, 102.5,

71.0, 51.9, 34.4, 32.5, 30.4 ppm; **HRMS (ESI)**  $m/z$  calcd for  $C_{37}H_{42}NO_2^+$  (M+H)<sup>+</sup> 532.3210, found  $m/z$  532.3210.

**2,6-di-tert-butyl-4-(2-(5-fluoro-1H-indol-3-yl)-1-phenylethyl)phenol (33)**

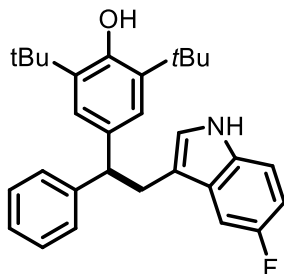

Colorless oil, 74 mg, 84% yield,  $R_f = 0.3$  (ethyl acetate/hexane = 5%); **<sup>1</sup>H NMR** (400 MHz,  $CDCl_3$ )  $\delta$  7.59 (s, 1H), 7.26 – 7.14 (m, 4H), 7.10 – 7.01 (m, 2H), 6.97 – 6.88 (m, 3H), 6.77 (td,  $J = 9.0, 2.2$  Hz, 1H), 6.50 (s, 1H), 4.93 (s, 1H), 4.11 (t,  $J = 7.7$  Hz, 1H), 3.69 – 2.56 (m, 2H), 1.27 (s, 18H) ppm; **<sup>13</sup>C NMR** (100 MHz,  $CDCl_3$ )  $\delta$  158.9, 156.6, 152.1, 145.3, 135.6, 132.4, 128.3, 128.2, 128.1, 126.0, 124.5, 124.1, 115.3, 115.2, 111.5, 111.4, 110.1, 109.9, 103.9, 103.7, 52.0, 34.4, 32.4, 30.4 ppm; **<sup>19</sup>F NMR** (376 MHz,  $CDCl_3$ )  $\delta$  -125.17 (td,  $J = 9.5, 4.1$  Hz) ppm; **HRMS (ESI)**  $m/z$  calcd for  $C_{30}H_{35}FNO^+$  (M+H)<sup>+</sup> 444.2697, found  $m/z$  444.2693.

**2,6-di-tert-butyl-4-(2-(5-chloro-1H-indol-3-yl)-1-phenylethyl)phenol (34)**

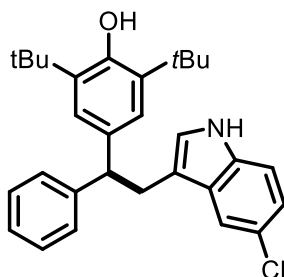

Yellow solid, m. p. 152-155 °C, 79 mg, 86% yield,  $R_f = 0.3$  (ethyl acetate/hexane = 5%); **<sup>1</sup>H NMR** (400 MHz,  $CDCl_3$ )  $\delta$  7.74 (s, 1H), 7.34 (t,  $J = 5.1$  Hz, 5H), 7.27 – 7.21 (m, 1H), 7.20 – 7.16 (m, 1H), 7.15 – 7.10 (m, 1H), 7.06 (d,  $J = 4.3$  Hz, 2H), 6.65 (s, 1H), 5.09 (d,  $J = 4.3$  Hz, 1H), 4.25 (td,  $J = 7.5, 4.4$  Hz, 1H), 3.46 (dt,  $J = 11.4, 5.7$  Hz, 2H), 1.43 (d,  $J = 4.4$  Hz, 18H) ppm; **<sup>13</sup>C NMR** (100 MHz,  $CDCl_3$ )  $\delta$  152.1, 145.3, 135.7, 135.5, 134.2, 129.0, 128.3, 128.1, 126.0, 125.0, 124.5, 123.7, 122.0, 118.5, 115.0, 111.9, 52.2, 34.4, 32.3, 30.34 ppm; **HRMS (ESI)**  $m/z$  calcd for  $C_{30}H_{35}ClNO^+$  (M+H)<sup>+</sup> 460.2402, found  $m/z$  460.2402.

**4-(2-(5-bromo-1H-indol-3-yl)-1-phenylethyl)-2,6-di-tert-butylphenol (35)**

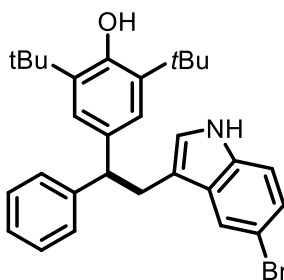

Yellow solid, m. p. 158-161 °C, 90 mg, 89% yield, Rf = 0.3 (ethyl acetate/hexane = 5%); <sup>1</sup>H NMR (400 MHz, CDCl<sub>3</sub>) δ 7.75 (s, 1H), 7.49 (d, *J* = 3.5 Hz, 1H), 7.37 – 7.31 (m, 4H), 7.25 (ddd, *J* = 11.7, 5.3, 3.5 Hz, 2H), 7.14 (dd, *J* = 8.5, 5.0 Hz, 1H), 7.06 (d, *J* = 5.1 Hz, 2H), 6.63 (d, *J* = 2.1 Hz, 1H), 5.09 (d, *J* = 5.1 Hz, 1H), 4.48 – 4.03 (m, 1H), 3.45 (dd, *J* = 13.3, 6.5 Hz, 2H), 1.43 (s, 18H) ppm; <sup>13</sup>C NMR (100 MHz, CDCl<sub>3</sub>) δ 152.1, 145.3, 135.7, 135.5, 134.5, 129.7, 128.3, 128.1, 126.1, 124.5, 123.5, 121.6, 114.9, 112.6, 112.3, 52.2, 34.4, 32.3, 30.4 ppm; HRMS (ESI) *m/z* calcd for C<sub>30</sub>H<sub>35</sub>BrNO<sup>+</sup> (M+H)<sup>+</sup> 504.1897, found *m/z* 504.1895.

**2,6-di-tert-butyl-4-(2-(2-methyl-1H-indol-3-yl)-1-phenylethyl)phenol (36)**

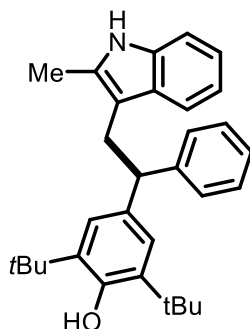

Yellow solid, m. p. 146-149 °C, 72 mg, 82% yield, Rf = 0.3 (ethyl acetate/hexane = 5%); <sup>1</sup>H NMR (400 MHz, CDCl<sub>3</sub>) δ 7.40 (s, 1H), 7.32 (d, *J* = 7.7 Hz, 1H), 7.19 – 7.05 (m, 6H), 7.03 – 6.91 (m, 2H), 6.79 (s, 2H), 4.90 (s, 1H), 4.06 (dd, *J* = 16.0, 8.3 Hz, 1H), 3.52 – 2.61 (m, 2H), 1.64 (s, 3H), 1.25 (s, 18H) ppm; <sup>13</sup>C NMR (100 MHz, CDCl<sub>3</sub>) δ 152.0, 145.5, 135.6, 135.3, 135.2, 132.0, 129.0, 128.3, 128.1, 125.9, 124.8, 120.7, 119.0, 118.1, 110.2, 110.0, 51.5, 34.3, 32.0, 30.3, 11.0 ppm; HRMS (ESI) *m/z* calcd for C<sub>31</sub>H<sub>38</sub>NO<sup>+</sup> (M+H)<sup>+</sup> 440.2948, found *m/z* 440.2948. This compound is known.<sup>2</sup>

**2,6-di-tert-butyl-4-(2-(5-methoxy-2-methyl-1H-indol-3-yl)-1-phenylethyl)phenol (37)**

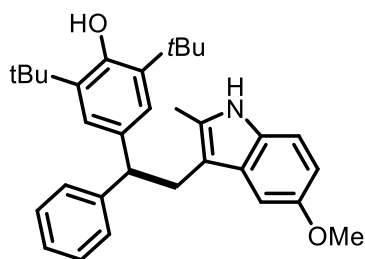

Yellow solid, m. p. 155-158 °C, 81 mg, 86% yield, Rf = 0.3 (ethyl acetate/hexane = 15%); <sup>1</sup>H NMR (400 MHz, CDCl<sub>3</sub>) δ 7.35 (s, 1H), 7.21 – 7.12 (m, 4H), 7.11 – 7.04 (m, 1H), 7.00 (d, *J* = 8.7 Hz, 1H), 6.79 (s, 2H), 6.73 – 6.58 (m, 2H), 4.92 (s, 1H), 4.12 – 3.85 (m, 1H), 3.70 (s, 3H), 3.19 (qd, *J* = 13.7, 7.6 Hz, 2H), 1.64 (s, 3H), 1.24 (s, 18H) ppm; <sup>13</sup>C NMR (100 MHz, CDCl<sub>3</sub>) δ 153.8, 152.0, 145.6, 135.7, 135.3, 133.0, 130.4, 129.4, 128.4, 128.1, 125.9, 124.8, 110.6, 110.3, 110.1, 100.6, 56.0, 51.4, 34.3, 32.1, 30.3, 11.1 ppm; HRMS (ESI) *m/z* calcd for C<sub>32</sub>H<sub>40</sub>NO<sub>2</sub><sup>+</sup> (M+H)<sup>+</sup> 470.3054, found *m/z* 470.3050.

**2,6-di-tert-butyl-4-(2-(6-methoxy-1H-indol-3-yl)-1-phenylethyl)phenol (38)**

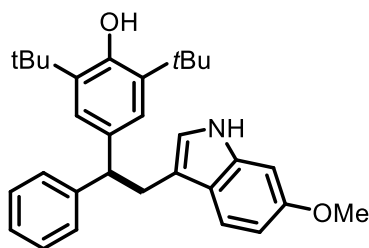

Yellow solid, m. p. 152-154 °C, 82 mg, 90% yield, Rf = 0.3 (ethyl acetate/hexane = 15%); **<sup>1</sup>H NMR** (400 MHz, CDCl<sub>3</sub>) δ 7.45 (s, 1H), 7.24 (d, *J* = 8.3 Hz, 1H), 7.16 (q, *J* = 8.1 Hz, 4H), 7.06 (dd, *J* = 9.2, 4.3 Hz, 1H), 6.95 (s, 2H), 6.74 – 6.59 (m, 2H), 6.33 (d, *J* = 1.6 Hz, 1H), 4.93 (s, 1H), 4.15 (t, *J* = 7.6 Hz, 1H), 3.70 (s, 3H), 3.44 – 3.04 (m, 2H), 1.28 (s, 18H) ppm; **<sup>13</sup>C NMR** (100 MHz, CDCl<sub>3</sub>) δ 156.4, 152.0, 145.5, 136.7, 135.9, 135.5, 128.2, 128.2, 125.9, 124.5, 122.4, 121.1, 119.4, 114.9, 109.1, 94.7, 55.7, 51.9, 34.4, 32.5, 30.4 ppm; **HRMS (ESI)** *m/z* calcd for C<sub>31</sub>H<sub>38</sub>NO<sub>2</sub><sup>+</sup> (M+H)<sup>+</sup> 456.2897, found *m/z* 456.2898.

**2,6-di-tert-butyl-4-(2-(6-fluoro-1H-indol-3-yl)-1-phenylethyl)phenol (39)**

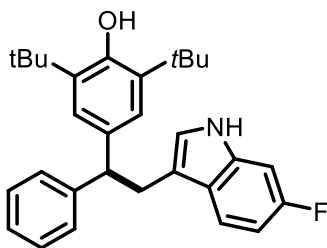

Colorless oil, 77 mg, 87% yield, Rf = 0.3 (ethyl acetate/hexane = 5%); **<sup>1</sup>H NMR** (400 MHz, CDCl<sub>3</sub>) δ 7.54 (s, 1H), 7.22 (dd, *J* = 8.6, 5.3 Hz, 1H), 7.20 – 7.13 (m, 4H), 7.10 – 7.02 (m, 1H), 6.92 (s, 2H), 6.81 (dd, *J* = 9.7, 2.2 Hz, 1H), 6.76 – 6.65 (m, 1H), 6.42 (d, *J* = 1.6 Hz, 1H), 4.93 (s, 1H), 4.13 (t, *J* = 7.7 Hz, 1H), 3.47 – 3.12 (m, 2H), 1.28 (s, 18H) ppm; **<sup>13</sup>C NMR** (100 MHz, CDCl<sub>3</sub>) δ 161.1, 158.7, 152.1, 145.4, 135.9, 135.7, 135.7, 135.6, 128.3, 128.1, 126.0, 122.5 (d, *J* = 3.7 Hz), 122.5, 122.5, 119.5 (d, *J* = 10.3 Hz), 115.1, 107.8 (d, *J* = 24.6 Hz), 97.2 (d, *J* = 26.0 Hz), 52.0, 34.4, 32.3, 30.4 ppm; **<sup>19</sup>F NMR** (376 MHz, CDCl<sub>3</sub>) δ -121.82 (td, *J* = 9.5, 5.4 Hz) ppm; **HRMS (ESI)** *m/z* calcd for : C<sub>30</sub>H<sub>35</sub>FNO<sup>+</sup> (M+H)<sup>+</sup> 444.2697, found *m/z* 444.2700.

**2-(3,5-di-tert-butyl-4-hydroxyphenyl)-1-(1H-indol-3-yl)-2-phenylethan-1-one (40)**

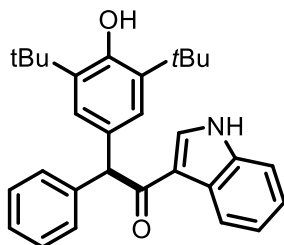

Yellow solid, m. p. 150-153 °C, 68 mg, 78% yield, Rf = 0.3 (ethyl acetate/hexane = 5%); **<sup>1</sup>H NMR** (400 MHz, CDCl<sub>3</sub>) δ 8.67 (s, 1H), 8.50 – 8.31 (m, 1H), 7.74 (d, *J* = 3.1 Hz, 1H), 7.30 (d, *J* = 7.2 Hz, 2H), 7.23 (d, *J* = 7.5 Hz, 1H), 7.17 (ddd, *J* = 14.2, 9.4, 5.9 Hz, 4H), 7.06 (s, 2H), 5.66 (s, 1H), 5.02 (s,

1H), 1.30 (s, 18H) ppm;  $^{13}\text{C}$  NMR (100 MHz,  $\text{CDCl}_3$ )  $\delta$  194.6, 152.7, 140.7, 136.2, 135.7, 131.7, 130.4, 129.0, 128.5, 126.7, 126.1, 125.8, 123.7, 122.8, 122.7, 118.0, 111.3, 60.9, 34.4, 30.3 ppm; HRMS (ESI)  $m/z$  calcd for  $\text{C}_{30}\text{H}_{34}\text{NO}_2^+$  (M+H) $^+$  440.2584, found  $m/z$  440.2588.

**4-(2-(3,5-di-tert-butyl-4-hydroxyphenyl)-2-phenylethyl)benzonitrile (41)**

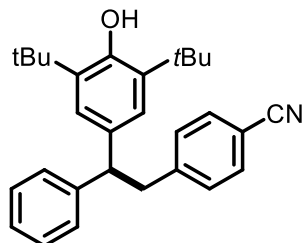

Colorless oil, 58 mg, 71% yield,  $R_f = 0.3$  (ethyl acetate/hexane = 5%);  $^1\text{H}$  NMR (400 MHz,  $\text{CDCl}_3$ )  $\delta$  7.35 (d,  $J = 8.2$  Hz, 2H), 7.22 – 7.14 (m, 2H), 7.10 (dd,  $J = 7.7, 3.1$  Hz, 3H), 6.96 (d,  $J = 8.1$  Hz, 2H), 6.84 (s, 2H), 4.98 (s, 1H), 4.01 (t,  $J = 7.9$  Hz, 1H), 3.27 (t,  $J = 7.4$  Hz, 2H), 1.29 (s, 18H) ppm;  $^{13}\text{C}$  NMR (100 MHz,  $\text{CDCl}_3$ )  $\delta$  152.2, 146.5, 143.9, 135.7, 134.2, 131.8, 129.9, 128.4, 128.0, 126.3, 124.4, 119.1, 109.7, 52.9, 43.0, 34.3, 30.3 ppm; HRMS (ESI)  $m/z$  calcd for  $\text{C}_{29}\text{H}_{34}\text{NO}^+$  (M+H) $^+$  412.2635, found  $m/z$  412.2638.

**2,6-di-tert-butyl-4-(2-(4-nitrophenyl)-1-phenylethyl)phenol (42)**

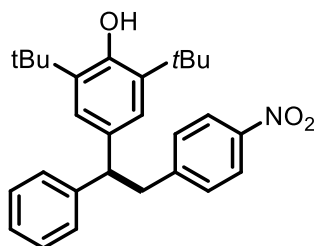

Colorless oil, 56 mg, 65% yield,  $R_f = 0.3$  (ethyl acetate/hexane = 5%);  $^1\text{H}$  NMR (400 MHz,  $\text{CDCl}_3$ )  $\delta$  7.93 (d,  $J = 8.4$  Hz, 2H), 7.20 – 7.13 (m, 2H), 7.10 (dd,  $J = 7.8, 4.0$  Hz, 3H), 7.02 (d,  $J = 8.4$  Hz, 2H), 6.87 (s, 2H), 4.98 (s, 1H), 4.04 (t,  $J = 7.9$  Hz, 1H), 3.32 (dd,  $J = 7.8, 3.8$  Hz, 2H), 1.29 (s, 18H) ppm;  $^{13}\text{C}$  NMR (100 MHz,  $\text{CDCl}_3$ )  $\delta$  152.3, 148.7, 143.8, 135.8, 134.1, 129.9, 128.4, 127.9, 126.4, 124.3, 123.5, 123.2, 52.9, 42.7, 34.3, 30.3 ppm; HRMS (ESI)  $m/z$  calcd for  $\text{C}_{28}\text{H}_{34}\text{NO}_3^+$  (M+H) $^+$  432.2533, found  $m/z$  432.2533.

**2,6-di-tert-butyl-4-(2-(4-methyl-2-nitrophenyl)-1-phenylethyl)phenol (43)**

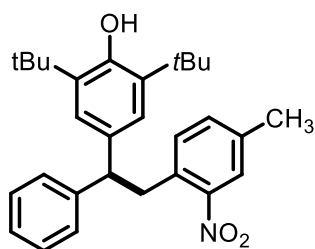

Colorless oil, 61 mg, 68% yield,  $R_f = 0.3$  (ethyl acetate/hexane = 5%);  $^1\text{H}$  NMR (400 MHz,  $\text{CDCl}_3$ )  $\delta$  7.89 (d,  $J = 2.1$  Hz, 1H), 7.72 (d,  $J = 2.2$  Hz, 1H), 7.39 (dd,  $J = 8.2, 2.2$  Hz, 1H), 7.26 – 7.03 (m, 5H),



6.79 (d,  $J = 9.0$  Hz, 3H), 4.97 (s, 1H), 4.05 (t,  $J = 7.9$  Hz, 1H), 3.52 (qd,  $J = 13.3, 7.9$  Hz, 2H), 2.49 (s, 3H), 1.28 (s, 18H) ppm;  $^{13}\text{C}$  NMR (100 MHz,  $\text{CDCl}_3$ )  $\delta$  152.3, 143.4, 135.7, 134.1, 133.4, 133.4, 133.0, 132.5, 132.2, 132.0, 128.4, 128.0, 126.5, 124.7, 124.6, 124.4, 52.1, 39.0, 34.3, 30.2, 30.2, 19.9 ppm; HRMS (ESI)  $m/z$  calcd for  $\text{C}_{29}\text{H}_{36}\text{NO}_3^+$  ( $\text{M}+\text{H}$ ) $^+$  446.2690, found  $m/z$  446.2689.

**2,6-di-tert-butyl-4-(2-(3-methyl-5-nitrophenyl)-1-phenylethyl)phenol (44)**

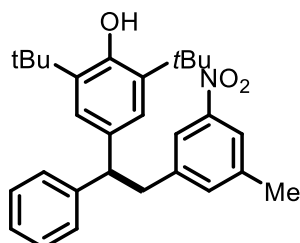

Colorless oil, 68 mg, 76% yield,  $R_f = 0.3$  (ethyl acetate/hexane = 5%);  $^1\text{H}$  NMR (400 MHz,  $\text{CDCl}_3$ )  $\delta$  8.15 (s, 1H), 7.97 (d,  $J = 1.8$  Hz, 1H), 7.64 (dd,  $J = 8.1, 1.8$  Hz, 1H), 7.44 (dd,  $J = 8.3, 1.9$  Hz, 1H), 7.31 (dd,  $J = 12.5, 5.4$  Hz, 2H), 7.23 (d,  $J = 8.1$  Hz, 1H), 6.90 (s, 2H), 6.85 (d,  $J = 8.3$  Hz, 1H), 5.10 (s, 1H), 4.18 (t,  $J = 7.8$  Hz, 1H), 3.65 (dt,  $J = 17.4, 8.7$  Hz, 2H), 2.58 (s, 3H), 1.40 (s, 18H) ppm;  $^{13}\text{C}$  NMR (100 MHz,  $\text{CDCl}_3$ )  $\delta$  152.3, 150.2, 143.4, 135.9, 135.7, 135.1, 134.6, 134.2, 134.1, 133.4, 132.5, 128.4, 128.0, 127.5, 127.3, 126.5, 124.6, 119.8, 119.7, 52.0, 39.1, 34.3, 30.3, 20.0 ppm; HRMS (ESI)  $m/z$  calcd for  $\text{C}_{29}\text{H}_{36}\text{NO}_3^+$  ( $\text{M}+\text{H}$ ) $^+$  446.2690, found  $m/z$  446.2692.

**4-(2-(1H-indol-3-yl)-1-phenylethyl)-2-(tert-butyl)phenol (46)**

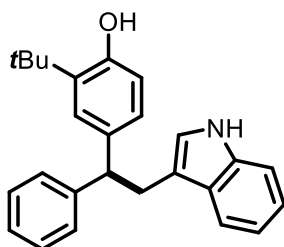

Colorless oil, 57 mg, 77% yield,  $R_f = 0.3$  (ethyl acetate/hexane = 10%);  $^1\text{H}$  NMR (400 MHz,  $\text{CDCl}_3$ ) 7.67 (s, 1H), 7.47 (d,  $J = 7.8$  Hz, 1H), 7.21 (d,  $J = 8.1$  Hz, 1H), 7.18 (dd,  $J = 4.8, 3.5$  Hz, 4H), 7.12 – 7.06 (m, 2H), 7.02 (dd,  $J = 10.9, 4.3$  Hz, 2H), 6.85 (dd,  $J = 8.1, 2.2$  Hz, 1H), 6.47 (dd,  $J = 7.3, 5.2$  Hz, 2H), 4.56 (s, 1H), 4.22 (t,  $J = 7.7$  Hz, 1H), 3.37 (dd,  $J = 7.6, 4.3$  Hz, 2H), 1.25 (s, 9H) ppm;  $^{13}\text{C}$  NMR (100 MHz,  $\text{CDCl}_3$ )  $\delta$  152.4, 145.5, 137.1, 136.0, 135.7, 128.3, 128.1, 127.7, 127.1, 126.0, 126.0, 122.3, 121.8, 119.2, 118.8, 116.4, 114.8, 110.9, 51.2, 34.5, 32.1, 29.6 ppm; HRMS (ESI)  $m/z$  calcd for  $\text{C}_{26}\text{H}_{28}\text{NO}^+$  ( $\text{M}+\text{H}$ ) $^+$  370.2165, found  $m/z$  370.2162.

**3,5-di-tert-butyl-2'-phenyl-1',4'-dihydro-2'H-spiro[cyclohexane-1,3'-cyclopenta[b]indole]-2,5-dien-4-one (47)**

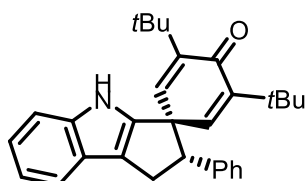

Yellow solid, m. p. 138-140 °C, 36 mg, 43% yield, R<sub>f</sub> = 0.5 (ethyl acetate/hexane = 5%); <sup>1</sup>H NMR (400 MHz, CDCl<sub>3</sub>) δ 7.80 (s, 1H), 7.60 (dd, *J* = 6.1, 2.6 Hz, 1H), 7.35 (dd, *J* = 6.3, 2.5 Hz, 1H), 7.25 – 7.12 (m, 7H), 6.81 (d, *J* = 2.7 Hz, 1H), 6.32 (d, *J* = 2.7 Hz, 1H), 4.36 (t, *J* = 8.7 Hz, 1H), 3.57 (dd, *J* = 14.4, 9.5 Hz, 1H), 3.37 (dd, *J* = 14.4, 7.8 Hz, 1H), 1.30 (s, 9H), 0.88 (s, 9H) ppm; <sup>13</sup>C NMR (100 MHz, CDCl<sub>3</sub>) δ 185.9, 148.8, 146.3, 142.3, 141.7, 140.7, 140.4, 138.2, 128.0, 128.0, 127.3, 124.7, 121.8, 120.1, 119.1, 119.0, 111.9, 62.6, 52.4, 35.1, 34.7, 29.6, 28.9, 28.4 ppm; HRMS (ESI) *m/z* calcd for C<sub>30</sub>H<sub>34</sub>NO<sup>+</sup> (M+H)<sup>+</sup> 424.2635, found *m/z* 424.2633.

**3,5-di-tert-butyl-7'-methyl-2'-phenyl-1',4'-dihydro-2'H-spiro[cyclohexane-1,3'-cyclopenta[b]indole]-2,5-dien-4-one (48)**

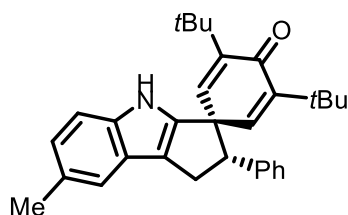

White solid, m. p. 141-143 °C, 34 mg, 39% yield, R<sub>f</sub> = 0.5 (ethyl acetate/hexane = 5%); <sup>1</sup>H NMR (400 MHz, CDCl<sub>3</sub>) δ 7.70 (s, 1H), 7.40 (dd, *J* = 24.2, 7.8 Hz, 2H), 7.21 (dd, *J* = 11.9, 7.4 Hz, 3H), 7.14 (d, *J* = 7.1 Hz, 2H), 7.02 (d, *J* = 8.3 Hz, 1H), 6.80 (d, *J* = 2.6 Hz, 1H), 6.31 (d, *J* = 2.7 Hz, 1H), 4.33 (t, *J* = 8.6 Hz, 1H), 3.53 (dd, *J* = 14.4, 9.5 Hz, 1H), 3.33 (dd, *J* = 14.4, 7.8 Hz, 1H), 2.48 (s, 3H), 1.30 (s, 9H), 0.88 (s, 9H) ppm; <sup>13</sup>C NMR (100 MHz, CDCl<sub>3</sub>) δ 185.9, 148.7, 146.3, 142.4, 141.8, 140.8, 138.7, 138.3, 129.5, 128.0, 128.0, 127.3, 124.9, 123.3, 118.8, 118.6, 111.5, 62.6, 52.5, 35.0, 34.6, 29.6, 28.9, 28.3, 21.5 ppm; HRMS (ESI) *m/z* calcd for C<sub>31</sub>H<sub>36</sub>NO<sup>+</sup> (M+H)<sup>+</sup> 438.2791, found *m/z* 438.2790.

**3,5-di-tert-butyl-7'-methoxy-2'-phenyl-1',4'-dihydro-2'H-spiro[cyclohexane-1,3'-cyclopenta[b]indole]-2,5-dien-4-one (49)**

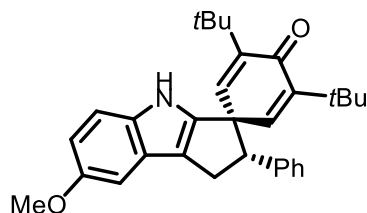

Yellow solid, m. p. 136-139 °C, 49 mg, 54% yield, R<sub>f</sub> = 0.3 (ethyl acetate/hexane = 5%); <sup>1</sup>H NMR (400 MHz, CDCl<sub>3</sub>) δ 7.69 (s, 1H), 7.23 (dd, *J* = 12.5, 3.7 Hz, 4H), 7.15 (d, *J* = 7.0 Hz, 2H), 7.06 (d, *J* = 2.2 Hz, 1H), 6.85 (dd, *J* = 8.8, 2.4 Hz, 1H), 6.80 (d, *J* = 2.7 Hz, 1H), 6.32 (d, *J* = 2.7 Hz, 1H), 4.34 (t, *J* = 8.6 Hz, 1H), 3.89 (s, 3H), 3.55 (dd, *J* = 14.2, 9.5 Hz, 1H), 3.34 (dd, *J* = 14.3, 7.8 Hz, 1H), 1.30 (s, 9H), 0.88 (s, 9H) ppm; <sup>13</sup>C NMR (100 MHz, CDCl<sub>3</sub>) δ 185.8, 154.5, 148.7, 146.3, 142.5, 142.3, 140.6, 138.2, 135.4, 128.0, 127.3, 125.0, 118.8, 112.5, 111.7, 101.3, 62.6, 56.0, 52.5, 35.1, 34.7, 29.6, 28.9, 28.3 ppm; HRMS (ESI) *m/z* calcd for C<sub>31</sub>H<sub>36</sub>NO<sub>2</sub><sup>+</sup> (M+H)<sup>+</sup> 454.2741, found *m/z* 454.2746.

**3,5-di-tert-butyl-7'-fluoro-2'-phenyl-1',4'-dihydro-2'H-spiro[cyclohexane-1,3'-cyclopenta[b]indole]-2,5-dien-4-one (50)**

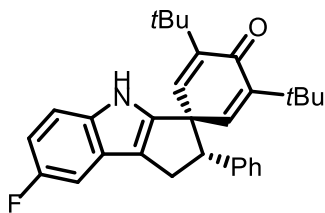

Brown oil, 41 mg, 46% yield,  $R_f = 0.5$  (ethyl acetate/hexane = 5%);  $^1\text{H NMR}$  (400 MHz,  $\text{CDCl}_3$ )  $\delta$  7.85 (s, 1H), 7.72 (d,  $J = 1.7$  Hz, 1H), 7.27 – 7.19 (m, 5H), 7.16 – 7.11 (m, 2H), 6.79 (d,  $J = 2.7$  Hz, 1H), 6.29 (d,  $J = 2.7$  Hz, 1H), 4.60 – 4.10 (m, 1H), 3.53 (dd,  $J = 14.4, 9.5$  Hz, 1H), 3.32 (dd,  $J = 14.4, 7.8$  Hz, 1H), 1.30 (s, 14H), 0.88 (s, 11H) ppm;  $^{13}\text{C NMR}$  (100 MHz,  $\text{CDCl}_3$ )  $\delta$  185.8, 159.3, 156.9, 148.9, 146.5, 143.7, 141.9, 140.3, 138.0, 136.8, 128.0, 128.0, 127.4, 124.9 (d,  $J = 9.9$  Hz), 124.2 (d,  $J = 48.8$  Hz), 119.1 (d,  $J = 4.4$  Hz), 112.3 (d,  $J = 9.5$  Hz), 109.9 (d,  $J = 26.0$  Hz), 104.2 (d,  $J = 23.5$  Hz), 62.6, 52.4, 35.1, 34.7, 29.6, 28.9, 28.2 ppm;  $^{19}\text{F NMR}$  (376 MHz,  $\text{CDCl}_3$ )  $\delta$  -123.74 (dd,  $J = 9.2, 4.4$  Hz) ppm; **HRMS (ESI)**  $m/z$  calcd for  $\text{C}_{30}\text{H}_{33}\text{FNO}^+$  ( $\text{M}+\text{H}$ ) $^+$  442.2541, found  $m/z$  442.2540.

**3,5-di-tert-butyl-7'-chloro-2'-phenyl-1',4'-dihydro-2'H-spiro[cyclohexane-1,3'-cyclopenta[b]indole]-2,5-dien-4-one (51)**

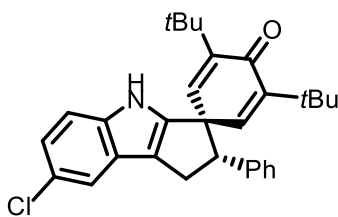

Yellow solid, m. p. 143-146 °C, 52 mg, 57% yield,  $R_f = 0.5$  (ethyl acetate/hexane = 5%);  $^1\text{H NMR}$  (400 MHz,  $\text{CDCl}_3$ ) 7.85 (s, 1H), 7.56 (d,  $J = 1.5$  Hz, 1H), 7.31 – 7.21 (m, 4H), 7.18 – 7.09 (m, 3H), 6.79 (d,  $J = 2.7$  Hz, 1H), 6.30 (d,  $J = 2.7$  Hz, 1H), 4.34 (t,  $J = 8.6$  Hz, 1H), 3.53 (dd,  $J = 14.4, 9.5$  Hz, 1H), 3.32 (dd,  $J = 14.4, 7.8$  Hz, 1H), 1.30 (s, 9H), 0.88 (s, 9H) ppm;  $^{13}\text{C NMR}$  (100 MHz,  $\text{CDCl}_3$ )  $\delta$  185.7, 149.0, 146.6, 143.4, 141.8, 140.2, 138.7, 137.9, 128.0, 128.0, 127.4, 125.8, 125.7, 122.0, 118.7, 118.7, 112.7, 62.6, 52.4, 35.1, 34.7, 29.6, 28.9, 28.2 ppm; **HRMS (ESI)**  $m/z$  calcd for  $\text{C}_{30}\text{H}_{33}\text{ClNO}^+$  ( $\text{M}+\text{H}$ ) $^+$  458.2245, found  $m/z$  458.2249.

**7'-bromo-3,5-di-tert-butyl-2'-phenyl-1',4'-dihydro-2'H-spiro[cyclohexane-1,3'-cyclopenta[b]indole]-2,5-dien-4-one (52)**

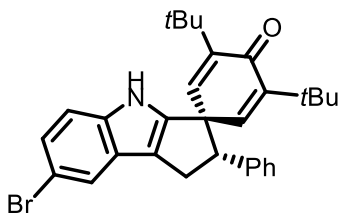

White solid, m. p. 146-148 °C, 55 mg, 55% yield,  $R_f = 0.5$  (ethyl acetate/hexane = 5%);  $^1\text{H NMR}$  (400 MHz,  $\text{CDCl}_3$ )  $\delta$  7.85 (s, 1H), 7.56 (d,  $J = 1.5$  Hz, 1H), 7.31 – 7.21 (m, 4H), 7.18 – 7.09 (m, 2H), 6.79 (d,  $J = 2.7$  Hz, 1H), 6.30 (d,  $J = 2.7$  Hz, 1H), 4.34 (t,  $J = 8.6$  Hz, 1H), 3.53 (dd,  $J = 14.4, 9.5$  Hz, 1H), 3.32 (dd,  $J = 14.4, 7.8$  Hz, 1H), 1.30 (s, 9H), 0.88 (s, 9H) ppm;  $^{13}\text{C NMR}$  (100 MHz,  $\text{CDCl}_3$ )  $\delta$  185.7, 149.0, 146.6, 143.2, 141.8, 140.2, 139.0, 137.9, 128.1, 128.0, 127.4, 126.3, 124.5, 121.8, 118.6, 113.4, 113.2,

62.6, 52.4, 35.1, 34.7, 29.6, 28.9, 28.2 ppm; **HRMS (ESI)**  $m/z$  calcd for  $C_{30}H_{33}BrNO^+$  (M+H)<sup>+</sup> 502.1740, found  $m/z$  502.1746.

**3,5-di-tert-butyl-6'-fluoro-2'-phenyl-1',4'-dihydro-2'H-spiro[cyclohexane-1,3'-cyclopenta[b]indole]-2,5-dien-4-one (53)**

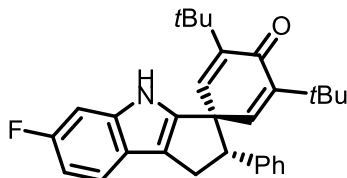

Yellow oil, 41 mg, 47% yield,  $R_f = 0.5$  (ethyl acetate/hexane = 5%); **<sup>1</sup>H NMR** (400 MHz,  $CDCl_3$ )  $\delta$  7.83 (s, 1H), 7.49 (dd,  $J = 8.6, 5.4$  Hz, 1H), 7.28 – 7.18 (m, 3H), 7.16 – 7.12 (m, 2H), 7.03 (dd,  $J = 9.7, 2.3$  Hz, 1H), 6.98 – 6.90 (m, 1H), 6.79 (d,  $J = 2.8$  Hz, 1H), 6.31 (d,  $J = 2.7$  Hz, 1H), 4.54 – 4.29 (m, 1H), 3.55 (dd,  $J = 14.4, 9.5$  Hz, 1H), 3.34 (dd,  $J = 14.4, 7.9$  Hz, 1H), 1.30 (s, 9H), 0.88 (s, 9H) ppm; **<sup>13</sup>C NMR** (100 MHz,  $CDCl_3$ )  $\delta$  185.8, 160.8, 158.5, 148.9, 146.5, 142.2, 140.5, 138.0, 128.0, 128.0, 127.4, 124.5, 124.0, 121.3, 119.6 (d,  $J = 10.3$  Hz), 108.7 (d,  $J = 24.2$  Hz), 98.5 (d,  $J = 26.0$  Hz), 62.7, 52.5, 35.1, 34.7, 29.6, 28.9, 28.3 ppm; **<sup>19</sup>F NMR** (376 MHz,  $CDCl_3$ )  $\delta$  -120.87 (td,  $J = 9.5, 5.4$  Hz) ppm; **HRMS (ESI)**  $m/z$  calcd for  $C_{30}H_{33}FNO^+$  (M+H)<sup>+</sup> 442.2541, found  $m/z$  442.2537.

**3,5-di-tert-butyl-2'-(o-tolyl)-1',4'-dihydro-2'H-spiro[cyclohexane-1,3'-cyclopenta[b]indole]-2,5-dien-4-one (54)**

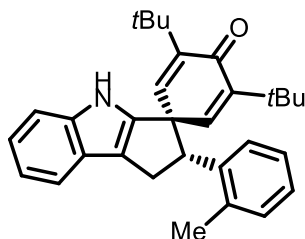

Brown oil, 39 mg, 45% yield,  $R_f = 0.5$  (ethyl acetate/hexane = 5%); **<sup>1</sup>H NMR** (400 MHz,  $CDCl_3$ )  $\delta$  7.70 (s, 1H), 7.60 (dd,  $J = 5.9, 2.6$  Hz, 1H), 7.39 – 7.29 (m, 2H), 7.24 – 7.15 (m, 2H), 7.11 (ddd,  $J = 13.7, 6.4, 3.3$  Hz, 3H), 6.82 (d,  $J = 2.7$  Hz, 1H), 6.29 (d,  $J = 2.7$  Hz, 1H), 4.68 (dd,  $J = 8.0, 6.1$  Hz, 1H), 3.45 (ddd,  $J = 20.8, 14.9, 7.1$  Hz, 2H), 2.19 (s, 3H), 1.25 (s, 9H), 0.94 (s, 9H) ppm; **<sup>13</sup>C NMR** (100 MHz,  $CDCl_3$ )  $\delta$  185.7, 146.3, 146.2, 143.4, 141.7, 141.5, 140.8, 139.1, 136.2, 130.5, 127.9, 126.9, 125.9, 124.5, 124.5, 121.8, 120.1, 119.9, 119.2, 111.8, 57.1, 52.0, 34.9, 34.8, 31.2, 29.4, 29.0, 20.4 ppm; **HRMS (ESI)**  $m/z$  calcd for  $C_{31}H_{36}NO^+$  (M+H)<sup>+</sup> 438.2791, found  $m/z$  438.2795.

**3,5-di-tert-butyl-2'-(3,4-dimethylphenyl)-1',4'-dihydro-2'H-spiro[cyclohexane-1,3'-cyclopenta[b]indole]-2,5-dien-4-one (55)**

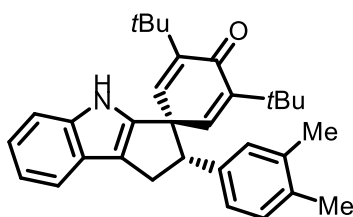

Yellow solid, m. p. 133-136 °C, 40 mg, 44% yield, Rf = 0.5 (ethyl acetate/hexane = 5%); <sup>1</sup>H NMR (400 MHz, CDCl<sub>3</sub>) δ 7.79 (s, 1H), 7.64 – 7.55 (m, 1H), 7.34 (dd, *J* = 7.3, 5.3 Hz, 1H), 7.22 – 7.10 (m, 2H), 6.99 (d, *J* = 8.2 Hz, 1H), 6.88 (d, *J* = 6.2 Hz, 2H), 6.80 (d, *J* = 2.4 Hz, 1H), 6.31 (d, *J* = 2.4 Hz, 1H), 4.30 (t, *J* = 8.7 Hz, 1H), 3.54 (dd, *J* = 14.3, 9.7 Hz, 1H), 3.33 (dd, *J* = 14.4, 7.9 Hz, 1H), 2.41 – 1.97 (m, 6H), 1.30 (s, 9H), 0.87 (s, 9H) ppm; <sup>13</sup>C NMR (100 MHz, CDCl<sub>3</sub>) δ 185.9, 148.7, 146.1, 142.5, 141.9, 141.1, 140.3, 135.9, 135.5, 135.5, 129.3, 129.2, 125.2, 124.7, 121.7, 120.1, 119.1, 119.1, 111.8, 62.4, 52.6, 35.0, 34.6, 29.6, 28.8, 28.3, 19.7, 19.3 ppm; HRMS (ESI) *m/z* calcd for C<sub>32</sub>H<sub>38</sub>NO<sup>+</sup> (M+H)<sup>+</sup> 452.2948, found *m/z* 452.2955.

**3,5-di-tert-butyl-2'-(3,4,5-trimethoxyphenyl)-1',4'-dihydro-2'H-spiro[cyclohexane-1,3'-cyclopenta[b]indole]-2,5-dien-4-one (56)**

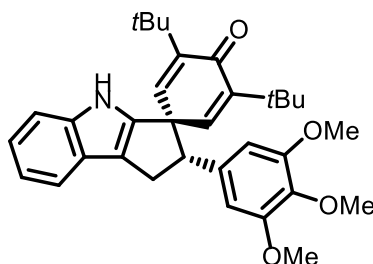

Yellow solid, m. p. 151-154 °C, 51 mg, 50% yield, Rf = 0.3 (ethyl acetate/hexane = 5%); <sup>1</sup>H NMR (400 MHz, CDCl<sub>3</sub>) δ 7.81 (s, 1H), 7.67 – 7.54 (m, 1H), 7.34 (dd, *J* = 6.6, 2.2 Hz, 1H), 7.23 – 7.14 (m, 2H), 6.83 (d, *J* = 2.7 Hz, 1H), 6.39 (s, 2H), 6.32 (d, *J* = 2.7 Hz, 1H), 4.36 (t, *J* = 8.6 Hz, 1H), 3.79 (s, 6H), 3.77 (s, 3H), 3.54 (dd, *J* = 14.4, 9.2 Hz, 1H), 3.40 (dd, *J* = 14.4, 8.1 Hz, 1H), 1.32 (s, 9H), 0.93 (s, 9H) ppm; <sup>13</sup>C NMR (100 MHz, CDCl<sub>3</sub>) δ 186.1, 152.9, 148.5, 146.3, 142.9, 141.4, 140.9, 140.5, 137.4, 134.5, 124.6, 121.9, 120.2, 119.0, 118.7, 111.9, 105.1, 62.1, 60.8, 56.2, 52.3, 35.0, 34.7, 29.8, 29.1, 28.7 ppm; HRMS (ESI) *m/z* calcd for C<sub>33</sub>H<sub>40</sub>NO<sub>4</sub><sup>+</sup> (M+H)<sup>+</sup> 514.2952, found *m/z* 514.2947.

**2'-([1,1'-biphenyl]-4-yl)-3,5-di-tert-butyl-1',4'-dihydro-2'H-spiro[cyclohexane-1,3'-cyclopenta[b]indole]-2,5-dien-4-one (57)**

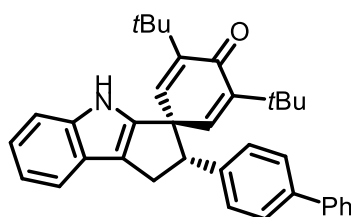

Yellow solid, m. p. 146-148 °C, 49 mg, 49% yield, Rf = 0.5 (ethyl acetate/hexane = 5%); <sup>1</sup>H NMR (400 MHz, CDCl<sub>3</sub>) δ 7.81 (s, 1H), 7.65 – 7.59 (m, 1H), 7.53 – 7.50 (m, 2H), 7.47 (t, *J* = 6.4 Hz, 2H), 7.41 (t, *J* = 7.5 Hz, 2H), 7.37 – 7.29 (m, 2H), 7.20 (ddd, *J* = 9.2, 7.9, 2.0 Hz, 4H), 6.83 (d, *J* = 2.8 Hz, 1H), 6.34 (d, *J* = 2.7 Hz, 1H), 4.40 (t, *J* = 8.6 Hz, 1H), 3.61 (dd, *J* = 14.3, 9.4 Hz, 1H), 3.40 (dd, *J* = 14.3, 7.8 Hz, 1H), 1.32 (s, 9H), 0.88 (s, 9H) ppm; <sup>13</sup>C NMR (100 MHz, CDCl<sub>3</sub>) δ 185.8, 148.8, 146.5, 142.3, 141.7, 140.9, 140.7, 140.4, 140.4, 137.4, 128.8, 128.3, 127.2, 127.1, 126.8, 124.7, 121.9, 120.2, 119.1, 119.0, 111.9, 62.4, 52.6, 35.1, 34.7, 29.6, 29.6, 28.9, 28.4 ppm; HRMS (ESI) *m/z* calcd for C<sub>36</sub>H<sub>38</sub>NO<sup>+</sup> (M+H)<sup>+</sup> 500.2948, found *m/z* 500.2943.

**3,5-di-tert-butyl-2'-(4-chlorophenyl)-1',4'-dihydro-2'H-spiro[cyclohexane-1,3'-cyclopenta[b]indole]-**

**2,5-dien-4-one (58)**

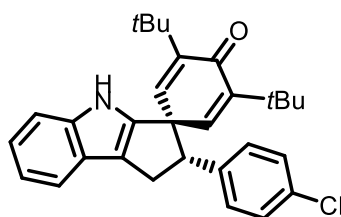

Yellow solid, m. p. 144-147 °C, 54 mg, 59% yield,  $R_f = 0.5$  (ethyl acetate/hexane = 5%);  $^1\text{H NMR}$  (400 MHz,  $\text{CDCl}_3$ )  $\delta$  7.80 (s, 1H), 7.63 – 7.56 (m, 1H), 7.34 (dd,  $J = 6.5, 2.1$  Hz, 1H), 7.19 (ddd,  $J = 7.8, 6.4, 5.0$  Hz, 4H), 7.08 (d,  $J = 8.4$  Hz, 2H), 6.79 (d,  $J = 2.7$  Hz, 1H), 6.29 (d,  $J = 2.7$  Hz, 1H), 4.31 (t,  $J = 8.6$  Hz, 1H), 3.50 (dd,  $J = 14.3, 9.4$  Hz, 1H), 3.36 (dd,  $J = 14.3, 7.8$  Hz, 1H), 1.30 (s, 9H), 0.91 (s, 9H) ppm;  $^{13}\text{C NMR}$  (100 MHz,  $\text{CDCl}_3$ )  $\delta$  185.7, 149.1, 146.8, 142.0, 141.5, 140.4, 140.2, 136.8, 133.0, 129.3, 128.1, 124.6, 121.9, 120.2, 119.1, 118.8, 111.9, 61.9, 52.4, 35.1, 34.8, 29.6, 29.0, 28.5 ppm; **HRMS (ESI)**  $m/z$  calcd for  $\text{C}_{30}\text{H}_{33}\text{ClNO}^+$  ( $\text{M}+\text{H}$ ) $^+$  458.2245, found  $m/z$  458.2249.

**3,5-di-tert-butyl-2'-(4-(trifluoromethyl)phenyl)-1',4'-dihydro-2'H-spiro[cyclohexane-1,3'-cyclopenta[b]indole]-2,5-dien-4-one (59)**

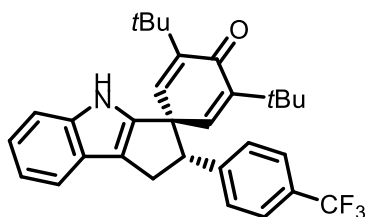

Yellow oil, 61 mg, 62% yield,  $R_f = 0.5$  (ethyl acetate/hexane = 5%);  $^1\text{H NMR}$  (400 MHz,  $\text{CDCl}_3$ )  $\delta$  7.81 (s, 1H), 7.65 – 7.59 (m, 1H), 7.51 (d,  $J = 8.1$  Hz, 2H), 7.35 (d,  $J = 6.8$  Hz, 1H), 7.28 (d,  $J = 8.1$  Hz, 2H), 7.23 – 7.14 (m, 2H), 6.82 (d,  $J = 2.7$  Hz, 1H), 6.27 (d,  $J = 2.7$  Hz, 1H), 4.40 (t,  $J = 8.6$  Hz, 1H), 3.58 (dd,  $J = 14.3, 9.3$  Hz, 1H), 3.40 (dd,  $J = 14.3, 7.8$  Hz, 1H), 1.31 (s, 9H), 0.87 (s, 9H) ppm;  $^{13}\text{C NMR}$  (100 MHz,  $\text{CDCl}_3$ )  $\delta$  185.6, 149.2, 146.9, 142.5, 141.9, 141.3, 140.5, 140.0, 129.6 (q,  $J = 32.5$  Hz), 128.2, 128.1, 125.4, 125.0 (q,  $J = 270.3$  Hz), 124.9 (q,  $J = 3.8$  Hz), 124.5, 124.0, 122.7, 122.0, 120.3, 119.1, 118.7, 111.9, 62.0, 52.3, 35.1, 34.7, 29.6, 28.9, 28.3 ppm;  $^{19}\text{F NMR}$  (376 MHz,  $\text{CDCl}_3$ )  $\delta$  -62.56 (s) ppm; **HRMS (ESI)**  $m/z$  calcd for  $\text{C}_{31}\text{H}_{33}\text{F}_3\text{NO}^+$  ( $\text{M}+\text{H}$ ) $^+$  492.2509, found  $m/z$  492.250.

**3,5-di-tert-butyl-2'-(thiophen-2-yl)-1',4'-dihydro-2'H-spiro[cyclohexane-1,3'-cyclopenta[b]indole]-2,5-dien-4-one (60)**

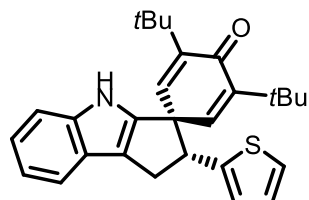

Yellow oil, 33 mg, 38% yield,  $R_f = 0.5$  (ethyl acetate/hexane = 5%);  $^1\text{H NMR}$  (400 MHz,  $\text{CDCl}_3$ )  $\delta$  7.80 (s, 1H), 7.62 – 7.57 (m, 1H), 7.54 (d,  $J = 8.7$  Hz, 1H), 7.35 (d,  $J = 2.0$  Hz, 1H), 7.22 – 7.16 (m, 1H), 7.15 – 7.08 (m, 1H), 6.91 (dd,  $J = 5.0, 3.6$  Hz, 1H), 6.80 (d,  $J = 3.4$  Hz, 1H), 6.75 (d,  $J = 2.7$  Hz, 1H), 6.34 (d,  $J = 2.7$  Hz, 1H), 4.56 (t,  $J = 8.7$  Hz, 1H), 3.50 (dd,  $J = 8.8, 2.0$  Hz, 2H), 1.28 (s, 9H), 0.94 (s, 9H) ppm;  $^{13}\text{C NMR}$  (100 MHz,  $\text{CDCl}_3$ )  $\delta$  185.9, 149.7, 147.1, 146.9, 141.8, 141.7, 141.4, 140.3,

139.9, 126.5, 124.6, 124.5, 124.5, 124.0, 123.8, 121.9, 120.2, 119.1, 119.1, 119.1, 118.6, 111.9, 57.4, 52.4, 35.2, 34.7, 30.7, 29.6, 29.0 ppm; **HRMS (ESI)**  $m/z$  calcd for  $C_{28}H_{32}NOS^+$  ( $M+H$ ) $^+$  430.2199, found  $m/z$  430.2203.

**2'-(4-bromothiophen-2-yl)-3,5-di-tert-butyl-1',4'-dihydro-2'H-spiro[cyclohexane-1,3'-cyclopenta[b]indole]-2,5-dien-4-one (61)**

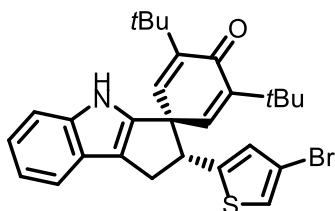

White solid, m. p. 134-137 °C, 52 mg, 51% yield,  $R_f$  = 0.5 (ethyl acetate/hexane = 5%);  $^1H$  NMR (400 MHz,  $CDCl_3$ )  $\delta$  7.83 (s, 1H), 7.56 (dd,  $J$  = 8.4, 6.7 Hz, 1H), 7.34 (dd,  $J$  = 6.9, 1.9 Hz, 1H), 7.19 (tt,  $J$  = 7.2, 5.8 Hz, 2H), 7.01 (d,  $J$  = 1.1 Hz, 1H), 6.73 (s, 1H), 6.71 (d,  $J$  = 2.8 Hz, 1H), 6.30 (d,  $J$  = 2.7 Hz, 1H), 4.60 – 4.26 (m, 1H), 3.45 (qd,  $J$  = 14.2, 8.7 Hz, 2H), 1.33 (s, 9H), 0.98 (s, 9H) ppm;  $^{13}C$  NMR (100 MHz,  $CDCl_3$ )  $\delta$  185.7, 150.1, 147.3, 143.2, 141.4, 140.9, 140.3, 139.3, 127.5, 124.4, 122.1, 120.9, 120.3, 119.1, 118.3, 111.9, 109.2, 57.1, 52.4, 35.2, 34.8, 30.1, 29.6, 29.0 ppm; **HRMS (ESI)**  $m/z$  calcd for  $C_{28}H_{31}BrNOS^+$  ( $M+H$ ) $^+$  508.1304, found  $m/z$  508.1300.

**(3,5-di-tert-butyl-4-hydroxyphenyl)(phenyl)methanone (62)**

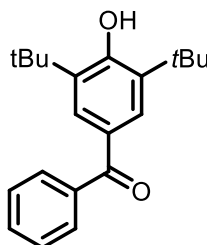

Colorless oil, 33 mg, 53% yield,  $R_f$  = 0.4 (ethyl acetate/hexane = 5%);  $^1H$  NMR (400 MHz,  $CDCl_3$ )  $\delta$  7.74 – 7.68 (m, 2H), 7.65 (s, 2H), 7.48 (dd,  $J$  = 10.5, 4.2 Hz, 1H), 7.40 (t,  $J$  = 7.5 Hz, 2H), 5.66 (s, 1H), 1.38 (s, 18H) ppm;  $^{13}C$  NMR (100 MHz,  $CDCl_3$ )  $\delta$  196.3, 158.1, 138.6, 135.6, 131.7, 129.8, 128.9, 128.2, 128.1, 34.4, 30.2 ppm; **HRMS (ESI)**  $m/z$  calcd for  $C_{21}H_{27}O_2^+$  ( $M+H$ ) $^+$  311.2006, found  $m/z$  311.2010.

**2-((1H-indol-3-yl)methyl)-1H-indole-3-carbaldehyde (66)**

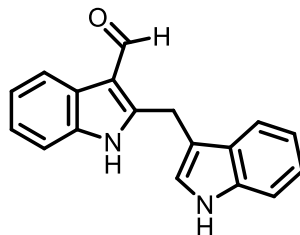

Slight yellow oil, 65 mg, 79% yield,  $R_f$  = 0.4 (ethyl acetate/hexane = 40%);  $^1H$  NMR (400 MHz,

CDCl<sub>3</sub>) δ 9.81 (s, 1H), 8.37 (s, 1H), 8.25 (dd, *J* = 6.2, 2.3 Hz, 1H), 7.58 (s, 1H), 7.48 (dd, *J* = 6.4, 2.0 Hz, 1H), 7.41 – 7.34 (m, 2H), 7.32 – 7.23 (m, 2H), 7.20 – 7.17 (m, 1H), 7.15 (dd, *J* = 4.2, 1.7 Hz, 1H), 7.05 (dd, *J* = 11.1, 4.0 Hz, 1H), 5.42 (s, 2H) ppm; <sup>13</sup>C NMR (100 MHz, CDCl<sub>3</sub>) δ 184.7, 138.2, 137.5, 136.5, 126.3, 125.7, 124.2, 124.0, 123.1, 123.0, 122.2, 120.6, 118.4, 118.0, 111.7, 110.2, 109.6, 42.5 ppm; **HRMS (ESI)** *m/z* calcd for C<sub>18</sub>H<sub>15</sub>N<sub>2</sub>O<sup>+</sup> (M+H)<sup>+</sup> 275.1179, found *m/z* 275.1183.

## 8. Reference

(1) (a) Sharma, M. B.; Rathod, J.; Gonnade, R. G.; Kumar, P.; *J. Org. Chem.* **2018**, *83*, 9353. (b) Shirsath, S. R.; Shinde, G. H.; Shaikh A. C.; Muthukrishnan, M.; *J. Org. Chem.* **2018**, *83*, 12305. (c) Gao, S.; Xu, G.; Yuan, Z.; Zhou, H.; Yao, H.; Lin, A.; *Eur. J. Org. Chem.* **2016**, 3006. (d) Zhao, K.; Zhi, Y.; Shu, T.; Valkonen, A.; Rissanen, K.; Enders, D.; *Angew. Chem. Int. Ed.* **2016**, *55*, 12104.



9. Copies  $^1\text{H}$  NMR,  $^{13}\text{C}$  NMR,  $^{19}\text{F}$  NMR

4-(2-(1H-indol-3-yl)-1-phenylethyl)-2,6-di-tert-butylphenol (3)

$^1\text{H}$  NMR (400 MHz,  $\text{CDCl}_3$ ):

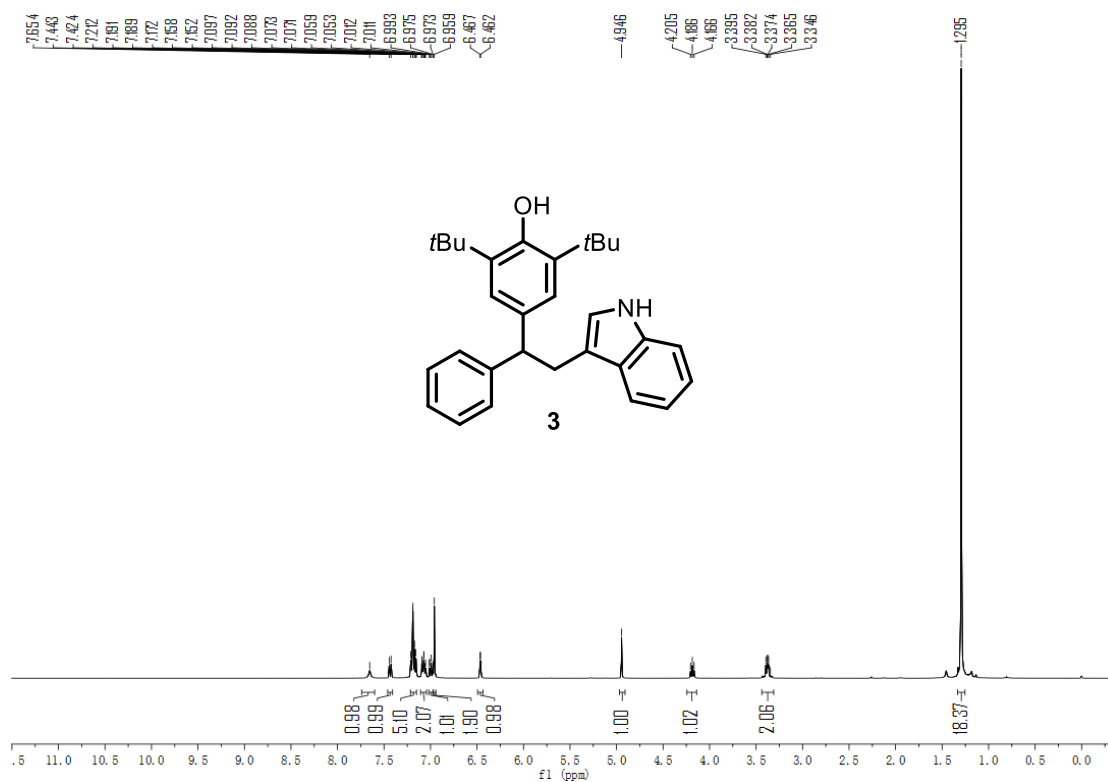

$^{13}\text{C}$  NMR (100 MHz,  $\text{CDCl}_3$ ):

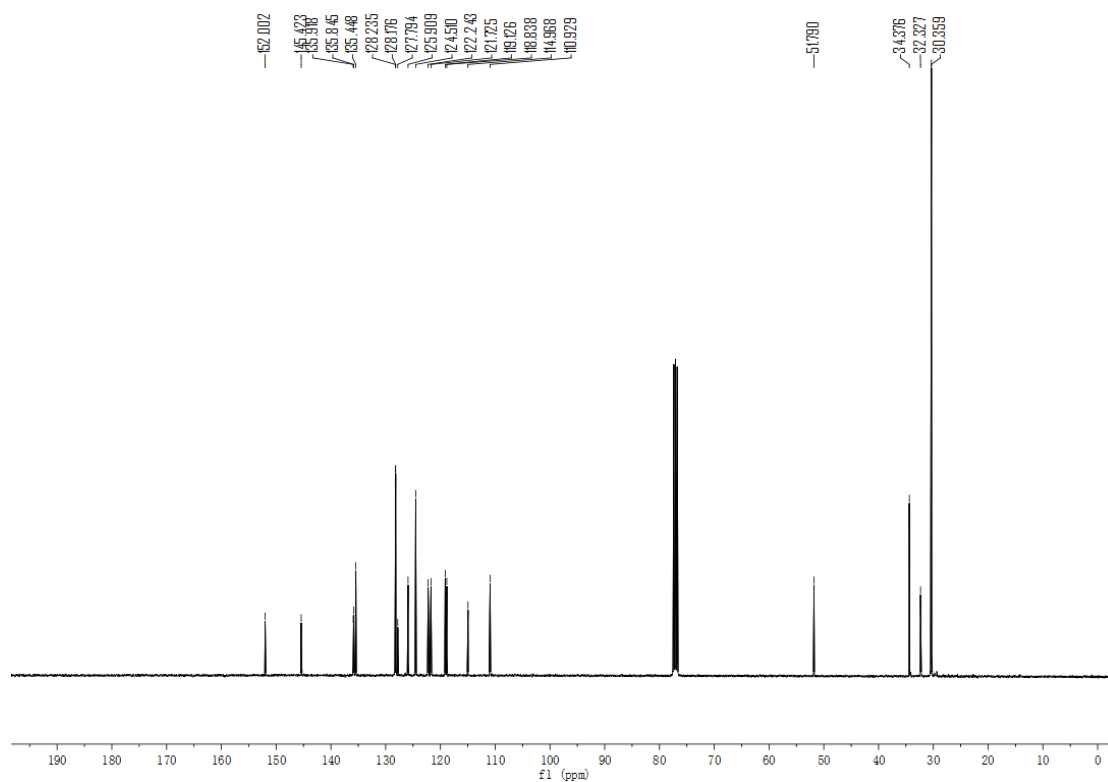

**4-(2-(1H-indol-3-yl)-1-(o-tolyl)ethyl)-2,6-di-tert-butylphenol (4)**

**<sup>1</sup>H NMR (400 MHz, CDCl<sub>3</sub>):**

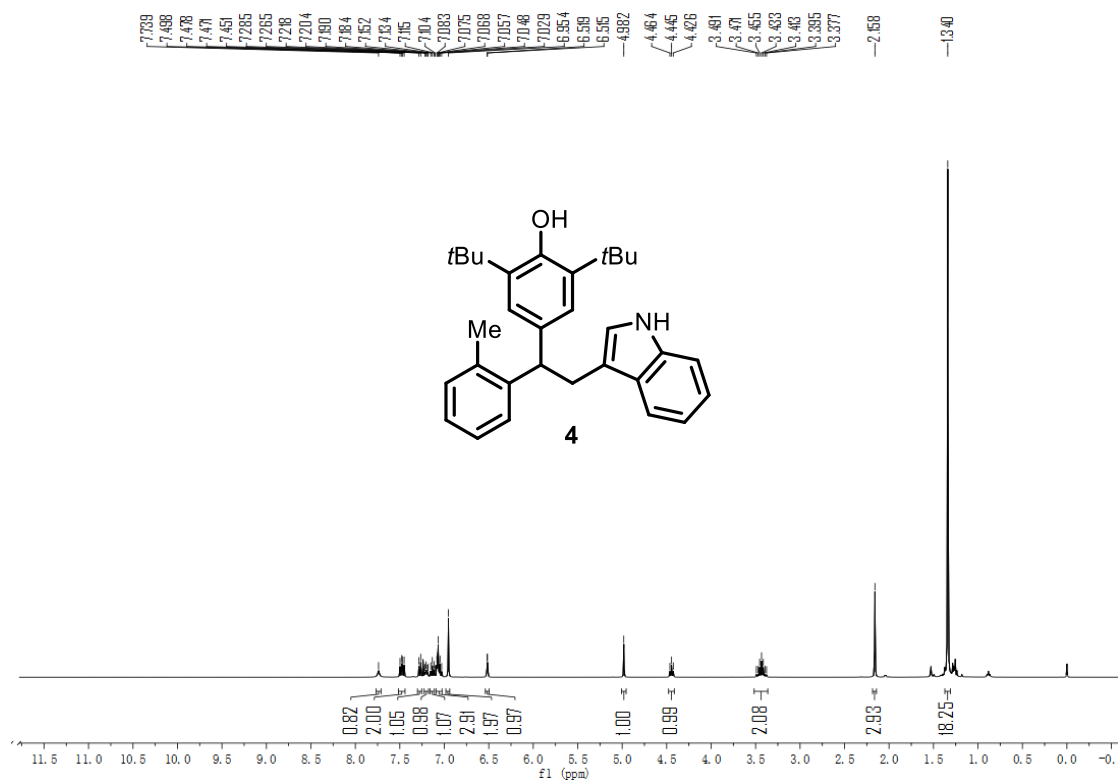

**<sup>13</sup>C NMR (100 MHz, CDCl<sub>3</sub>):**

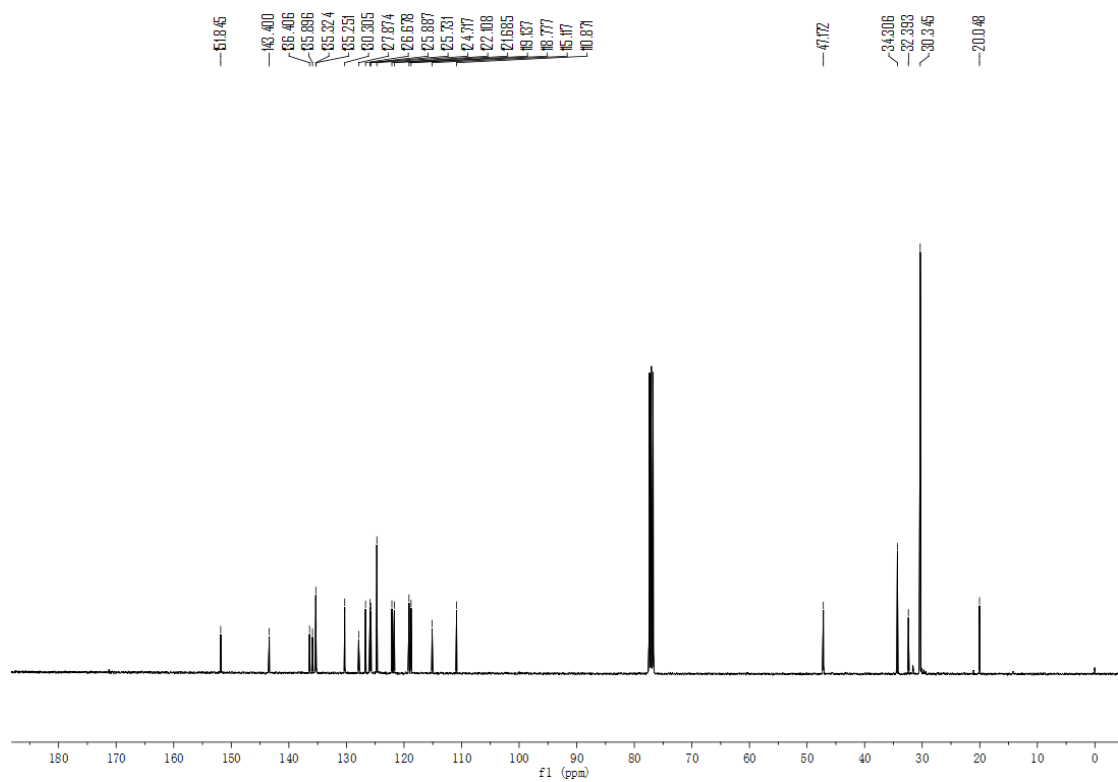

**DEPT**

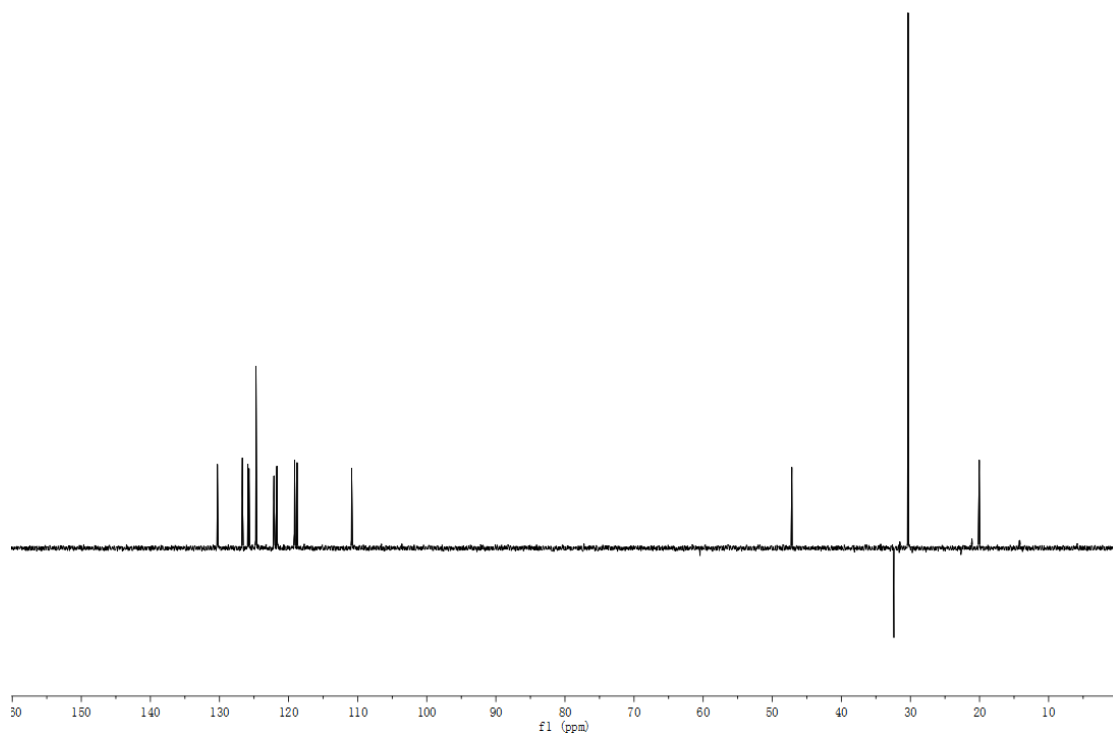

**4-(2-(1H-indol-3-yl)-1-(m-tolyl)ethyl)-2,6-di-tert-butylphenol (5)**

**<sup>1</sup>H NMR (400 MHz, CDCl<sub>3</sub>):**

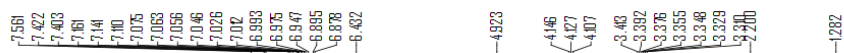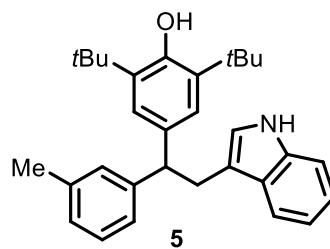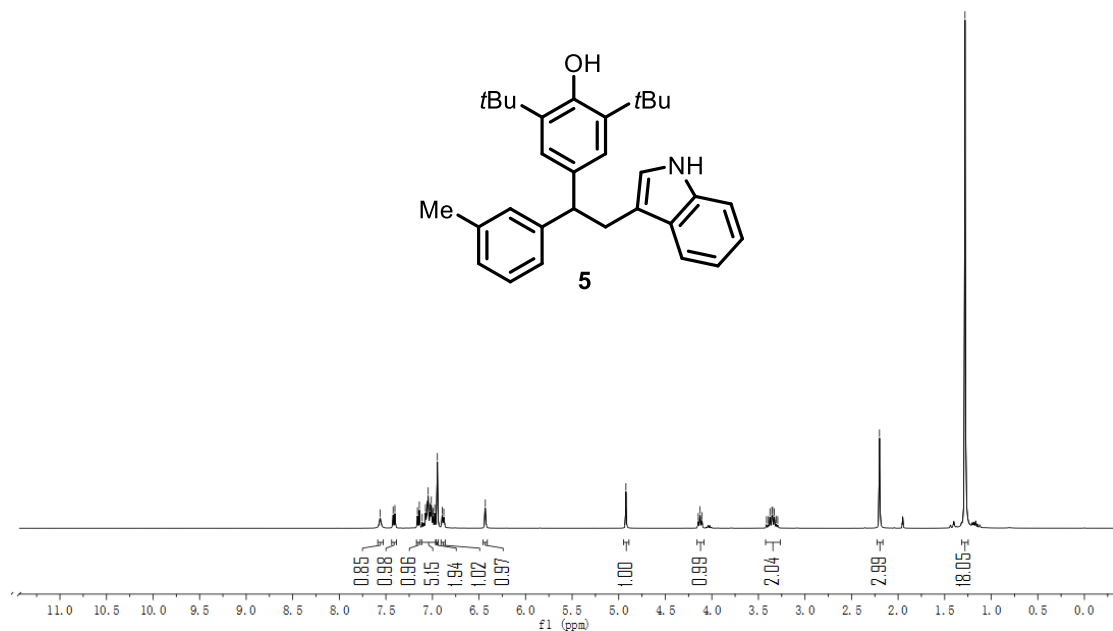

**<sup>13</sup>C NMR (100 MHz, CDCl<sub>3</sub>):**

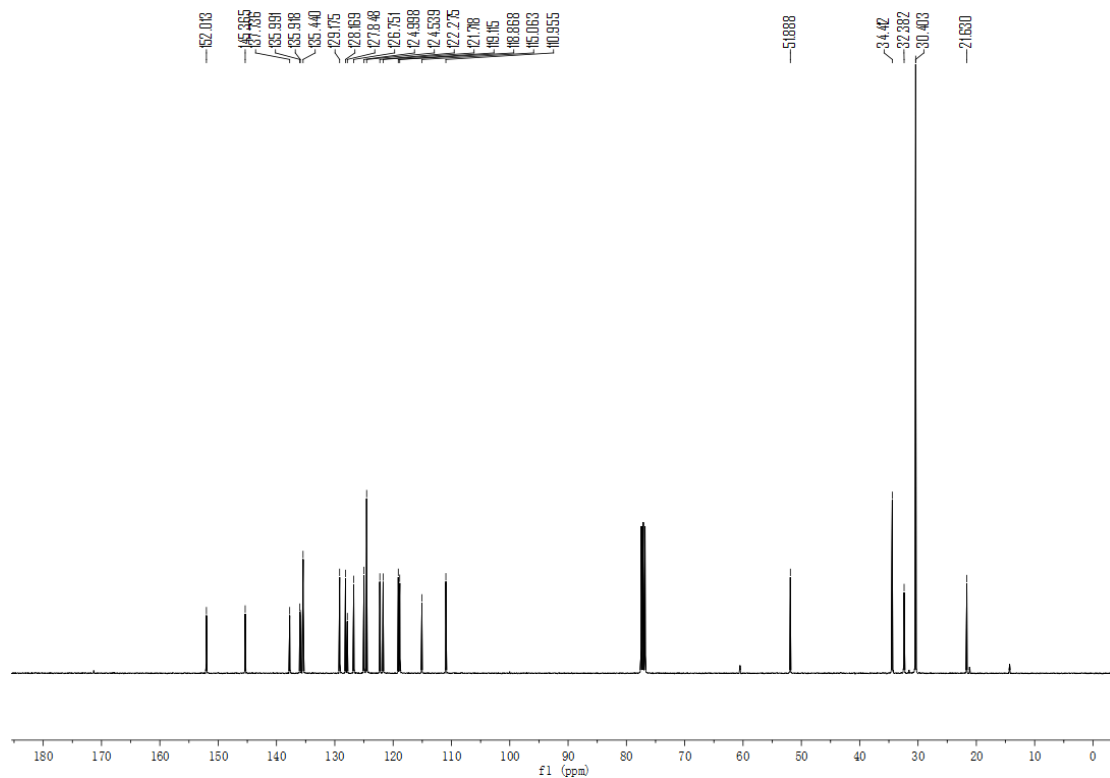

**4-(2-(1H-indol-3-yl)-1-(p-tolyl)ethyl)-2,6-di-tert-butylphenol (6)**  
<sup>1</sup>H NMR (400 MHz, CDCl<sub>3</sub>):

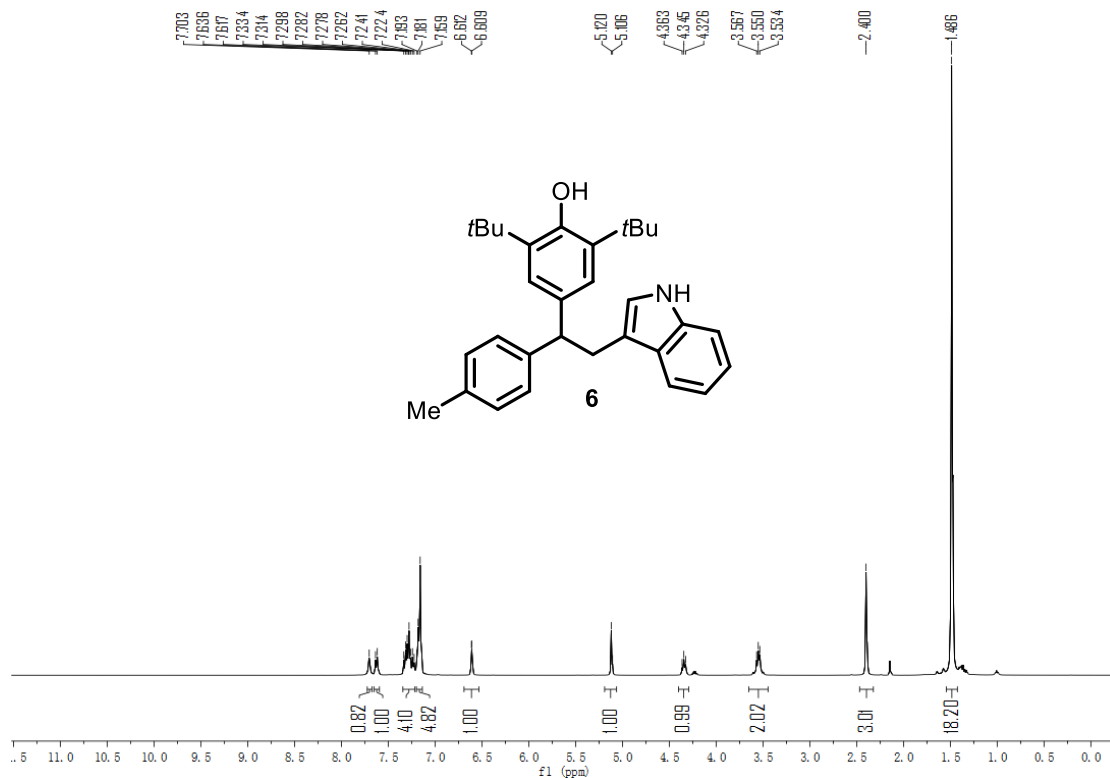

<sup>13</sup>C NMR (100 MHz, CDCl<sub>3</sub>):

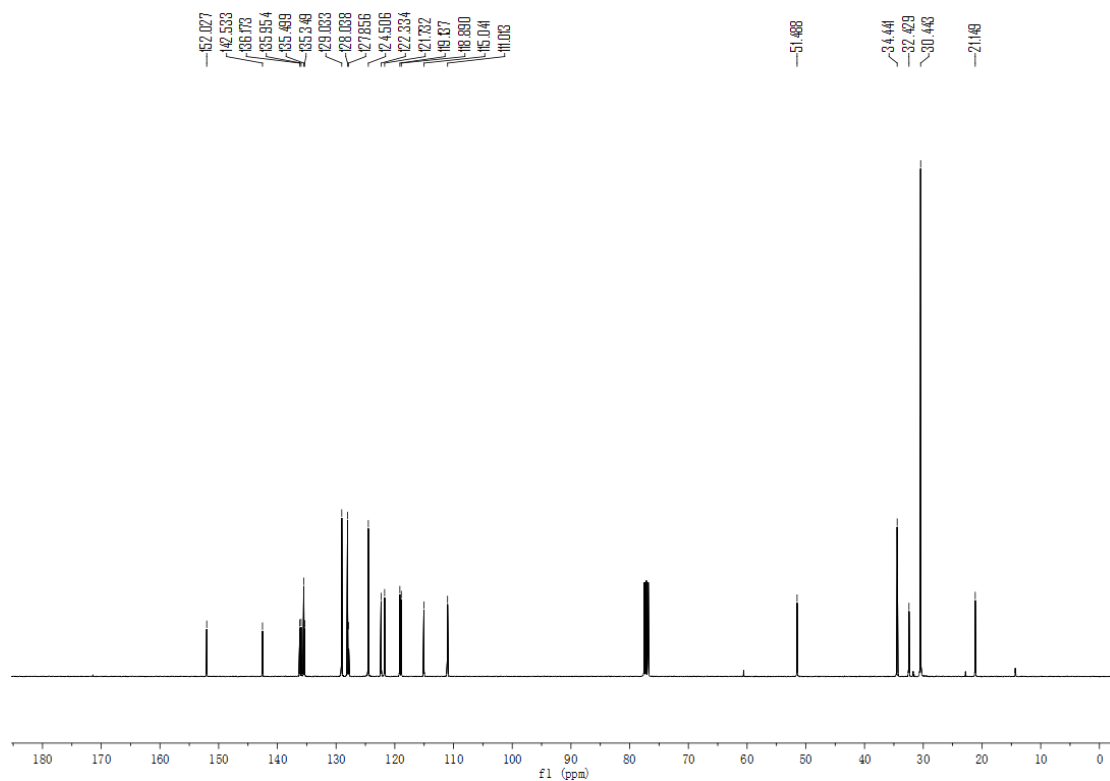

**4-(2-(1H-indol-3-yl)-1-(2-methoxyphenyl)ethyl)-2,6-di-tert-butylphenol (7)**  
<sup>1</sup>H NMR (400 MHz, CDCl<sub>3</sub>):

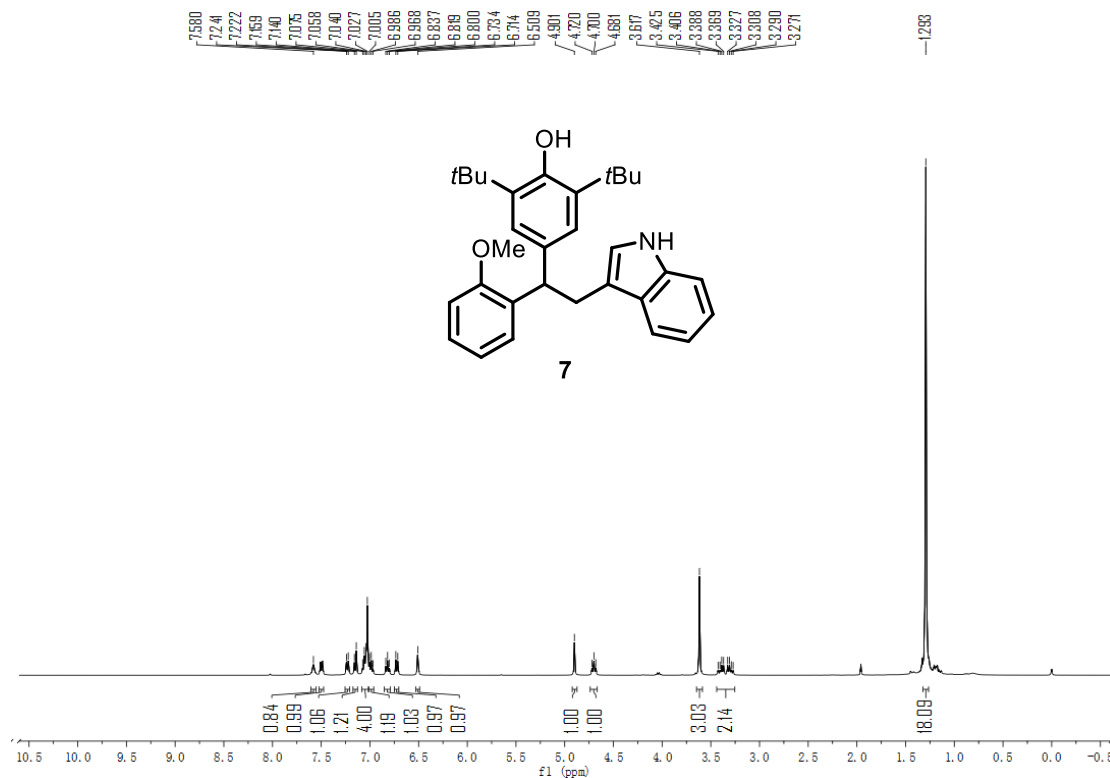

<sup>13</sup>C NMR (100 MHz, CDCl<sub>3</sub>):

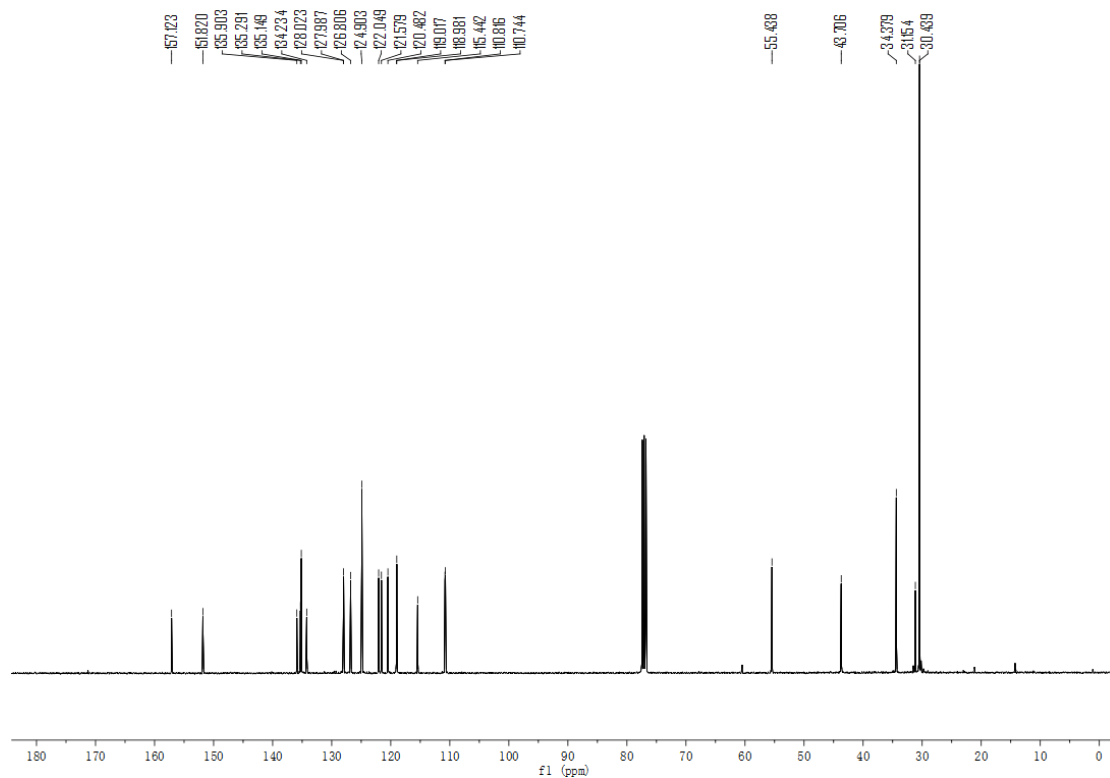

**4-(2-(1H-indol-3-yl)-1-(4-methoxyphenyl)ethyl)-2,6-di-tert-butylphenol (8)**  
 $^{13}\text{C}$  NMR (100 MHz,  $\text{CDCl}_3$ ):

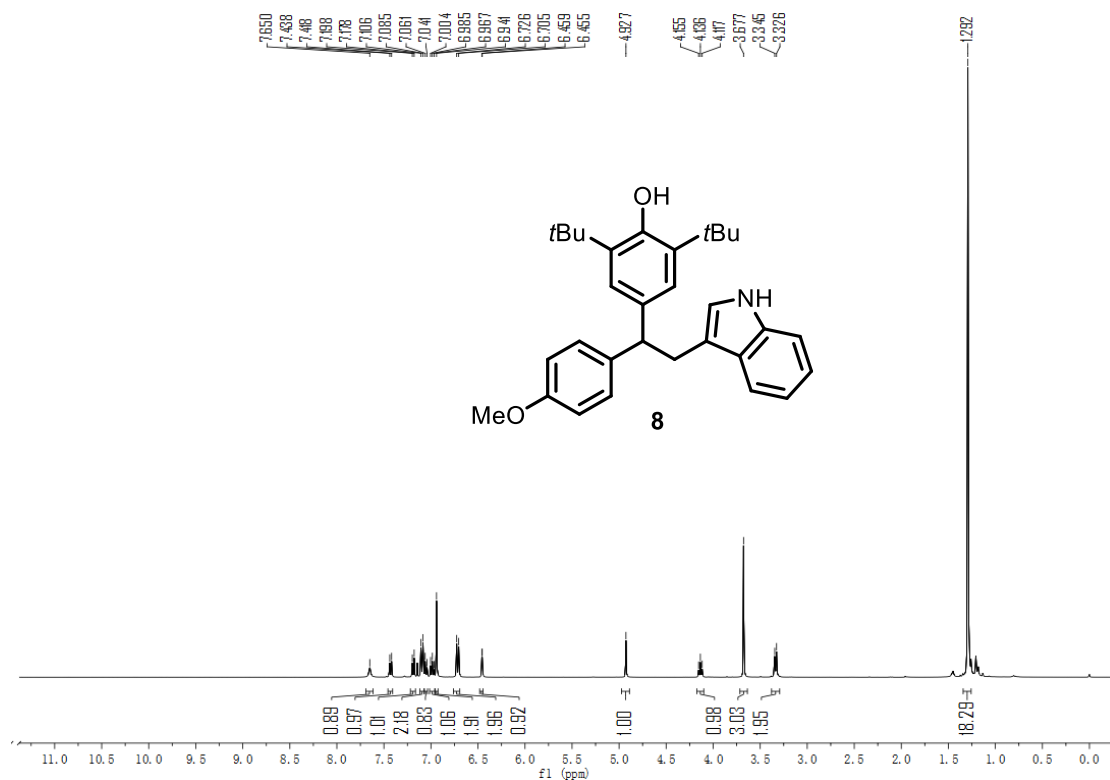

$^1\text{H}$  NMR (400 MHz,  $\text{CDCl}_3$ ):

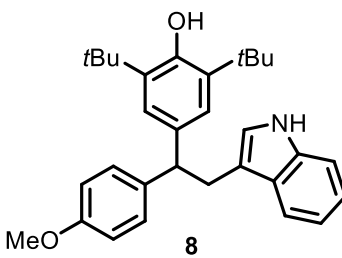

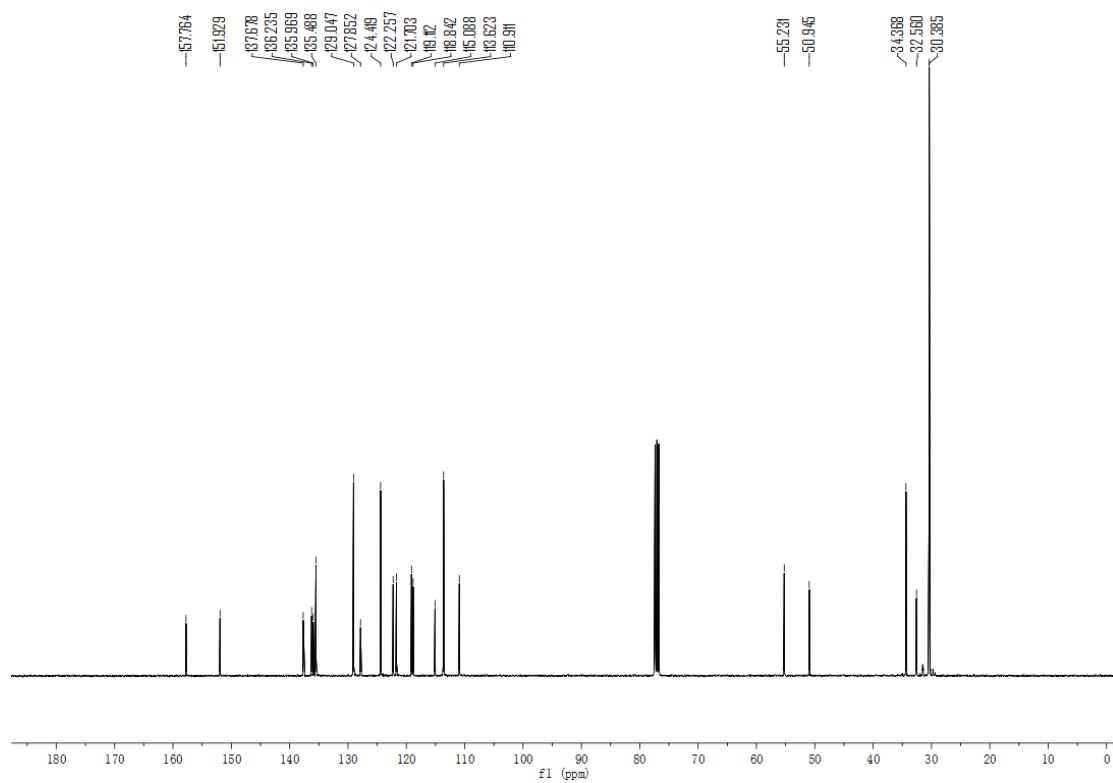

**DEPT**

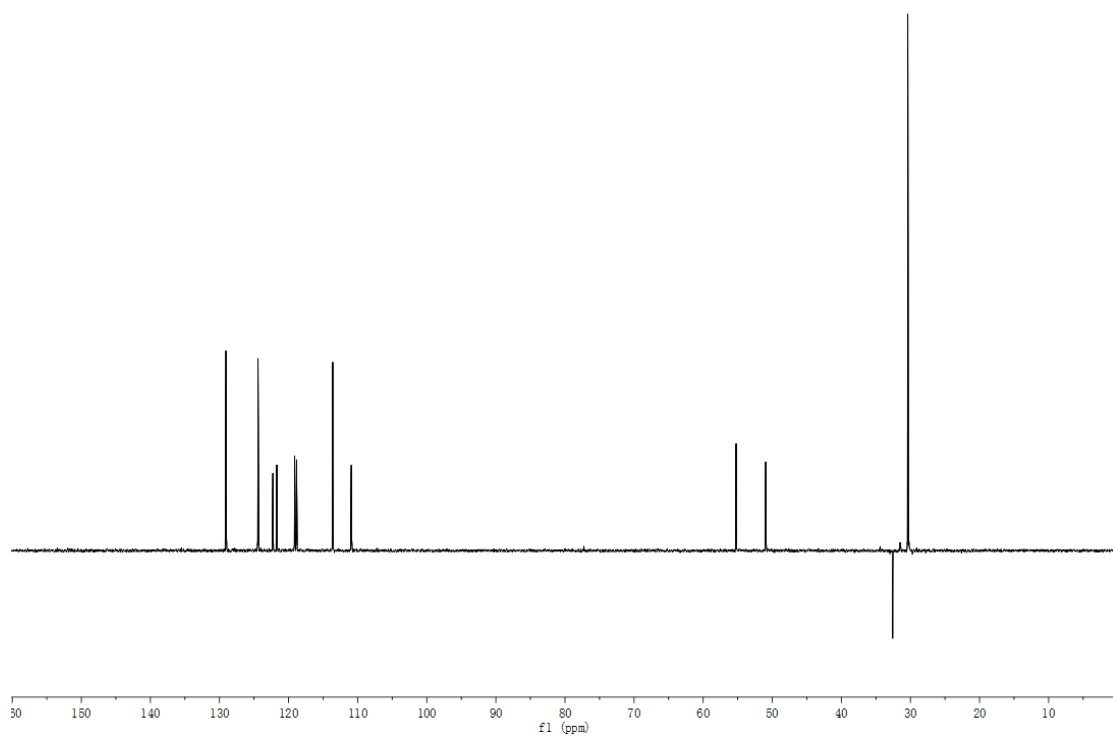

**2,6-di-tert-butyl-4-(1-(4-(tert-butyl)phenyl)-2-(1H-indol-3-yl)ethyl)phenol (9)**  
 $^1\text{H}$  NMR (400 MHz,  $\text{CDCl}_3$ ):

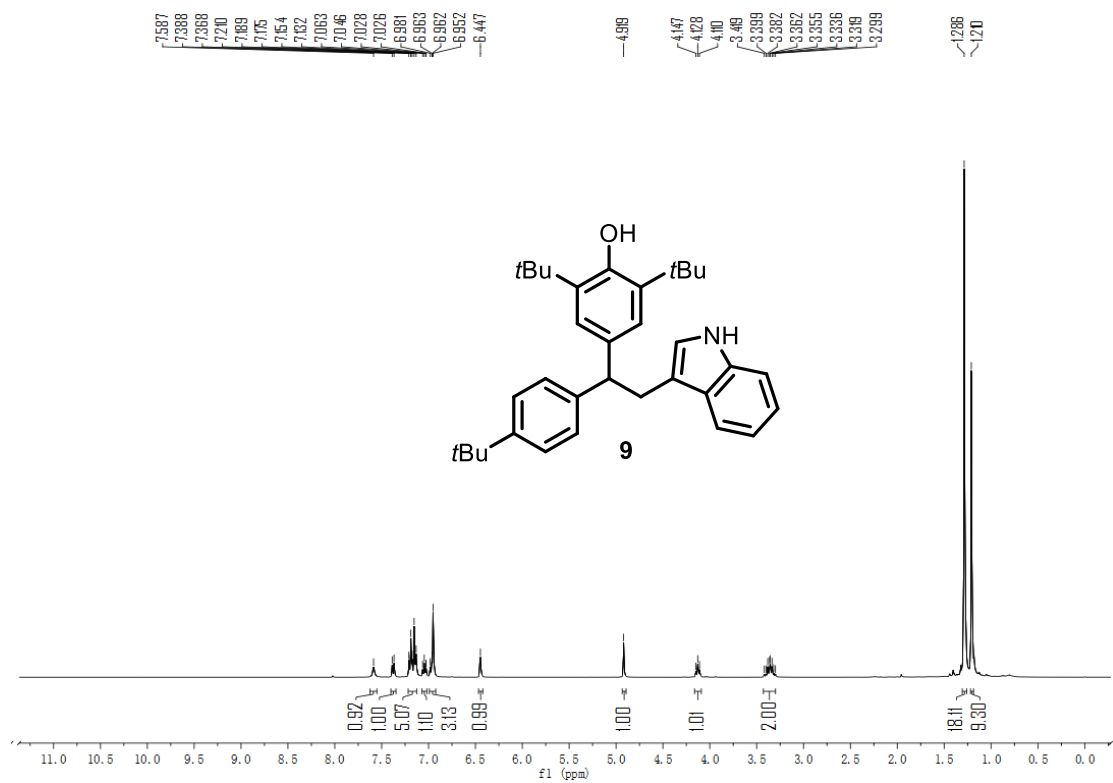

<sup>13</sup>C NMR (100 MHz, CDCl<sub>3</sub>):

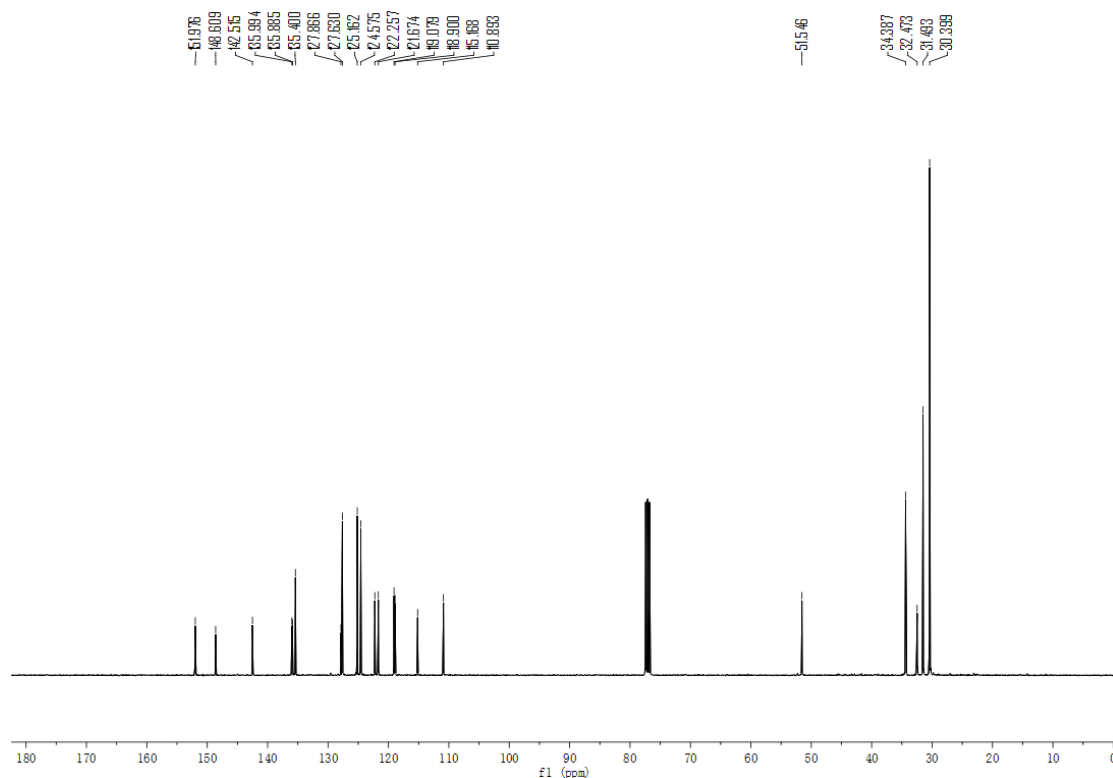

**2,6-di-tert-butyl-4-(1-(4-(dimethylamino)phenyl)-2-(1H-indol-3-yl)ethyl)phenol**  
**(10)**

<sup>1</sup>H NMR (400 MHz, CDCl<sub>3</sub>):



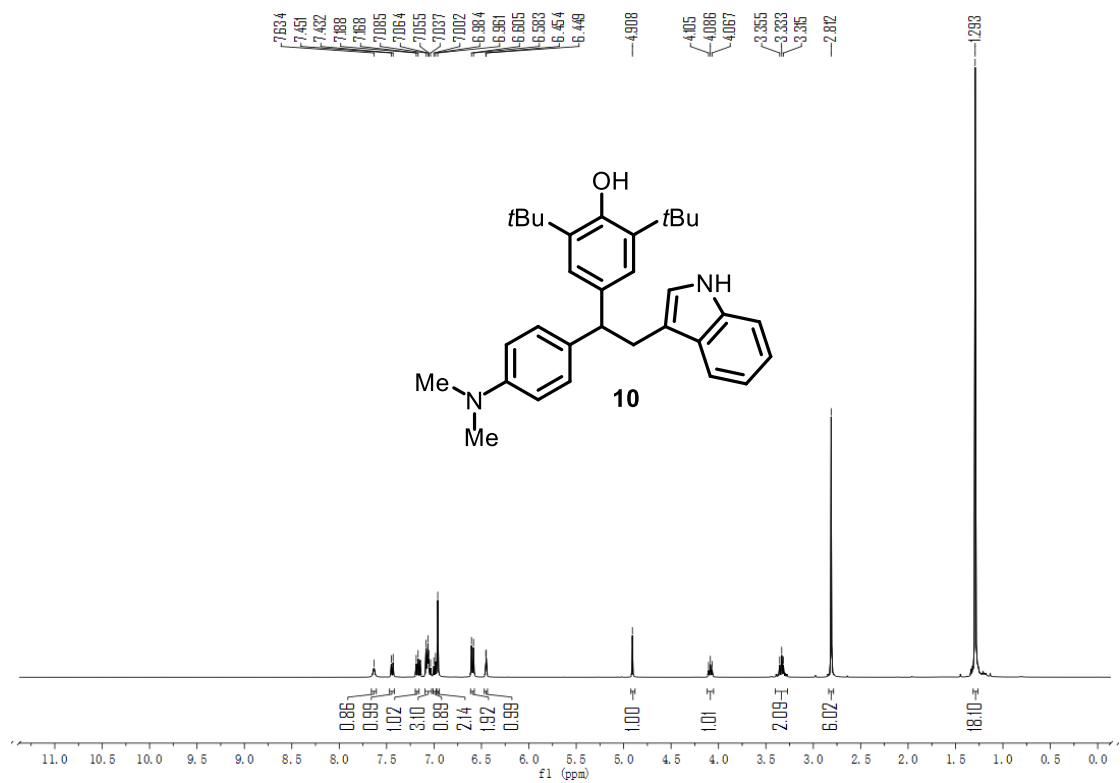

<sup>13</sup>C NMR (100 MHz, CDCl<sub>3</sub>):

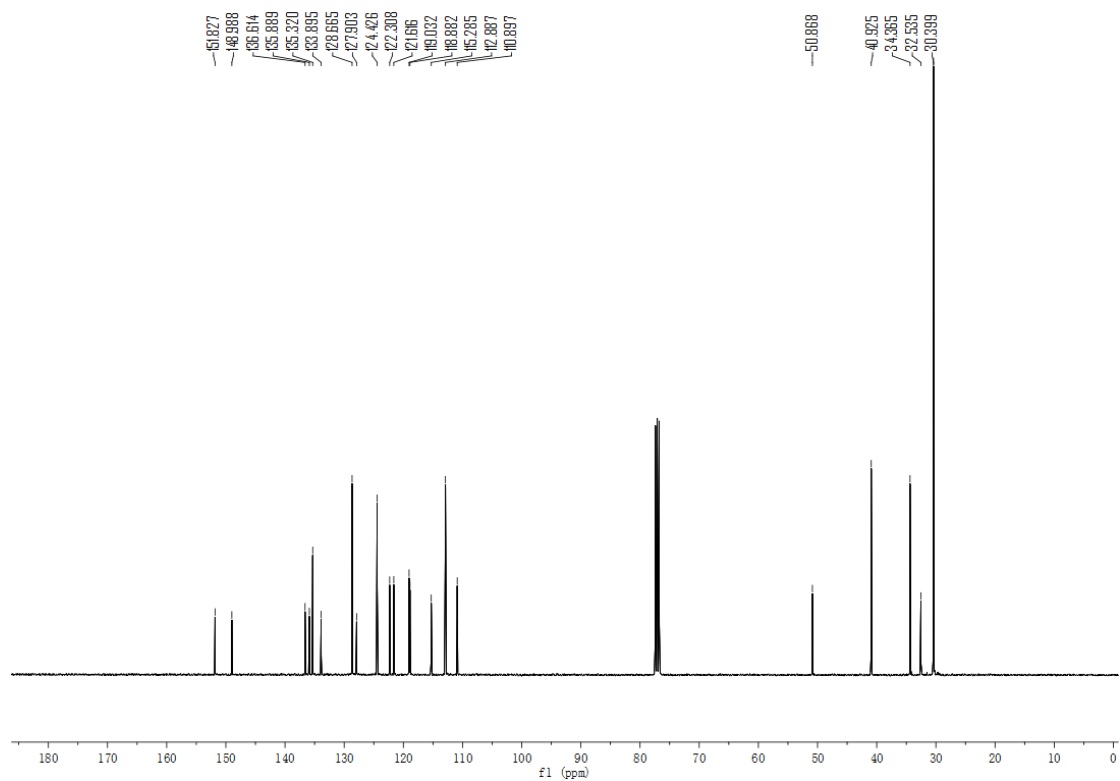

DEPT

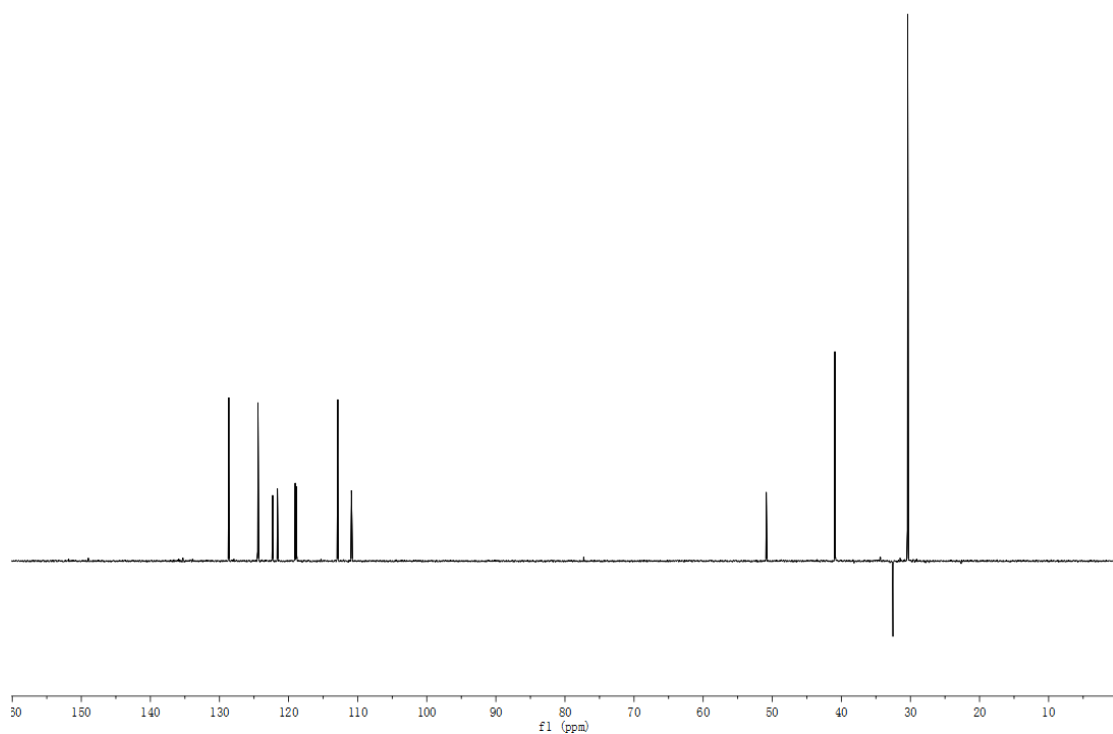

**2,6-di-tert-butyl-4-(1-(3,4-dimethylphenyl)-2-(1H-indol-3-yl)ethyl)phenol (11)**  
<sup>1</sup>H NMR (400 MHz, CDCl<sub>3</sub>):

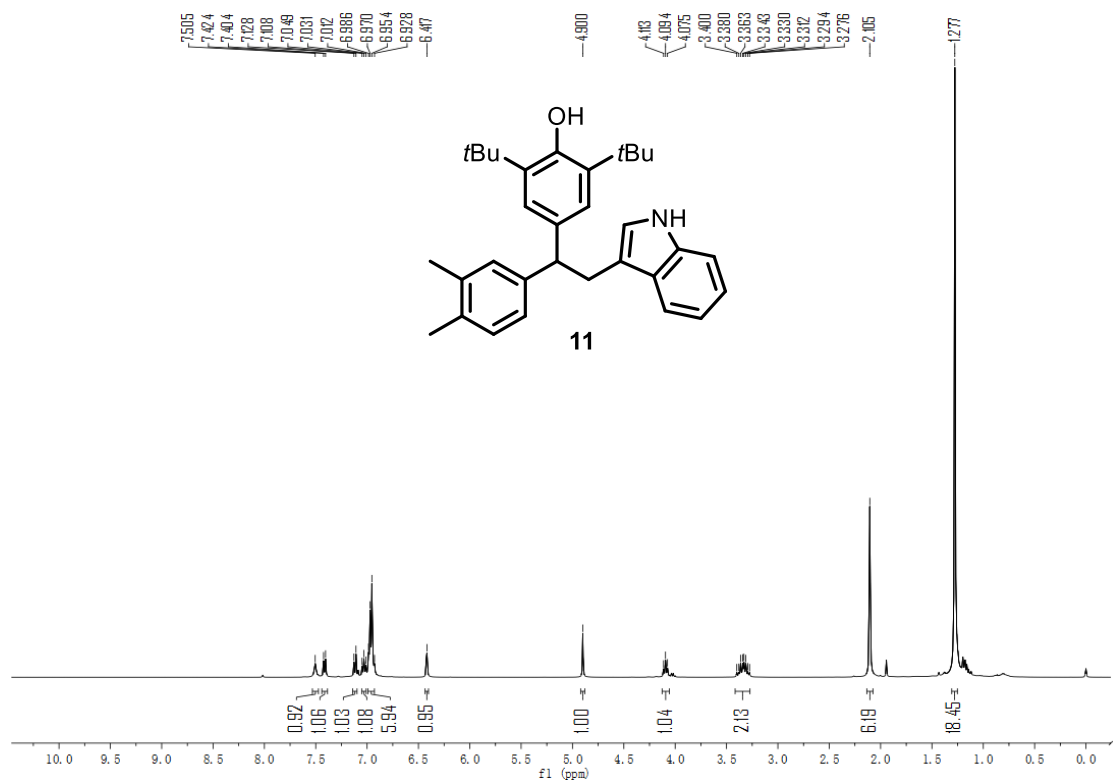

<sup>13</sup>C NMR (100 MHz, CDCl<sub>3</sub>):

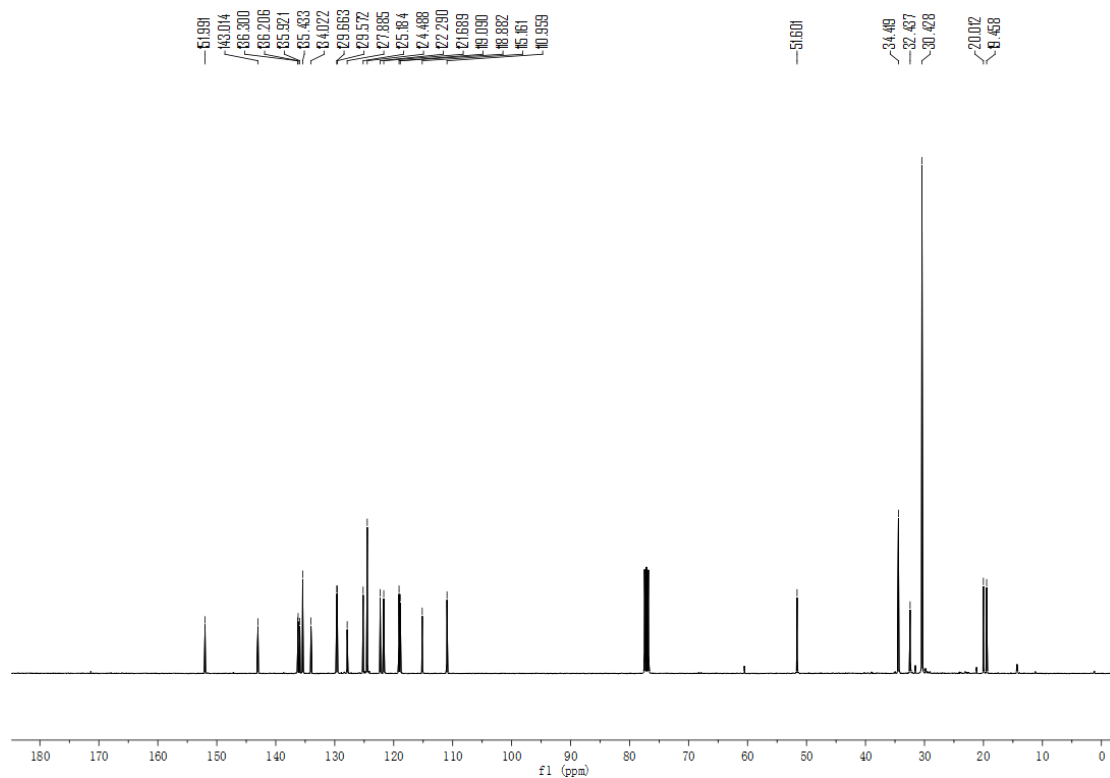

**4-(2-(1H-indol-3-yl)-1-(3,4,5-trimethoxyphenyl)ethyl)-2,6-di-tert-butylphenol (12)**  
 $^1\text{H}$  NMR (400 MHz,  $\text{CDCl}_3$ ):

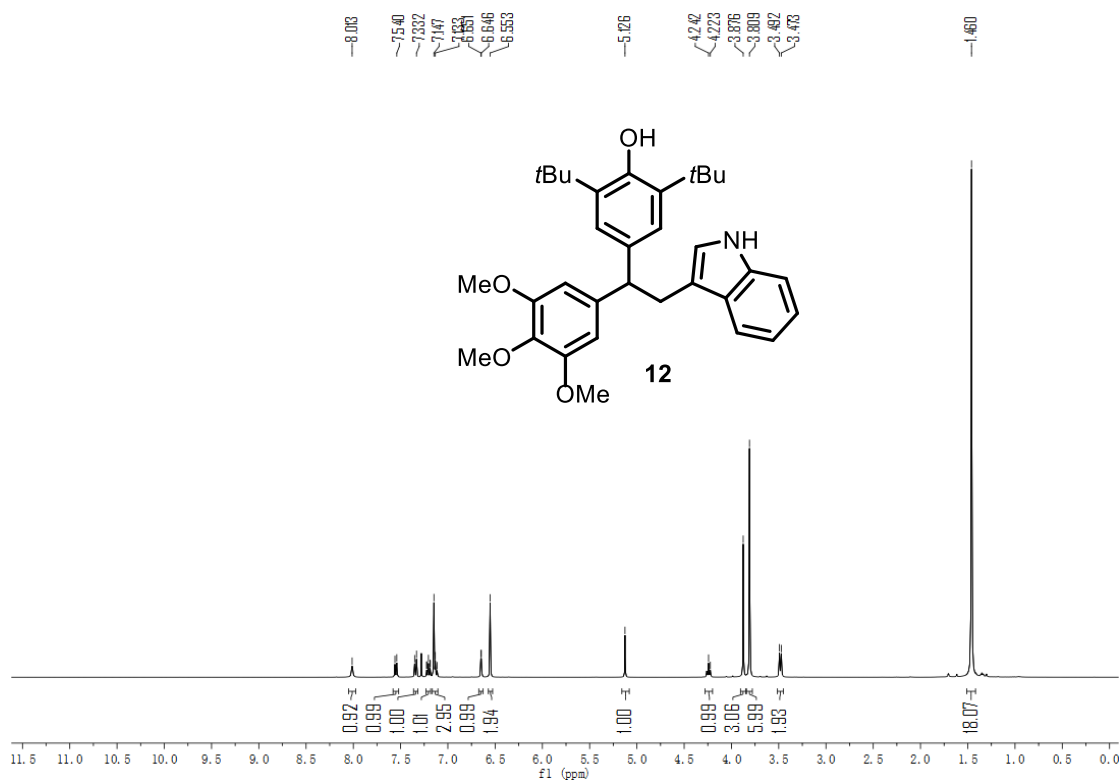

$^{13}\text{C}$  NMR (100 MHz,  $\text{CDCl}_3$ ):

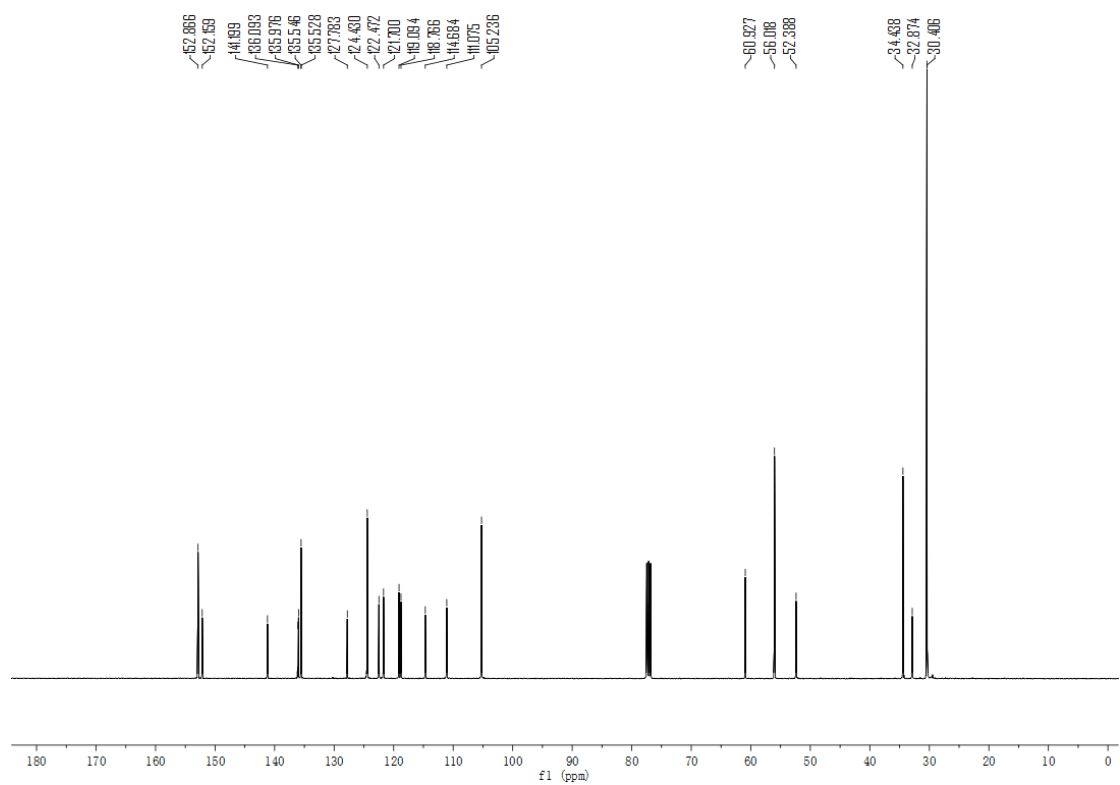

### DEPT

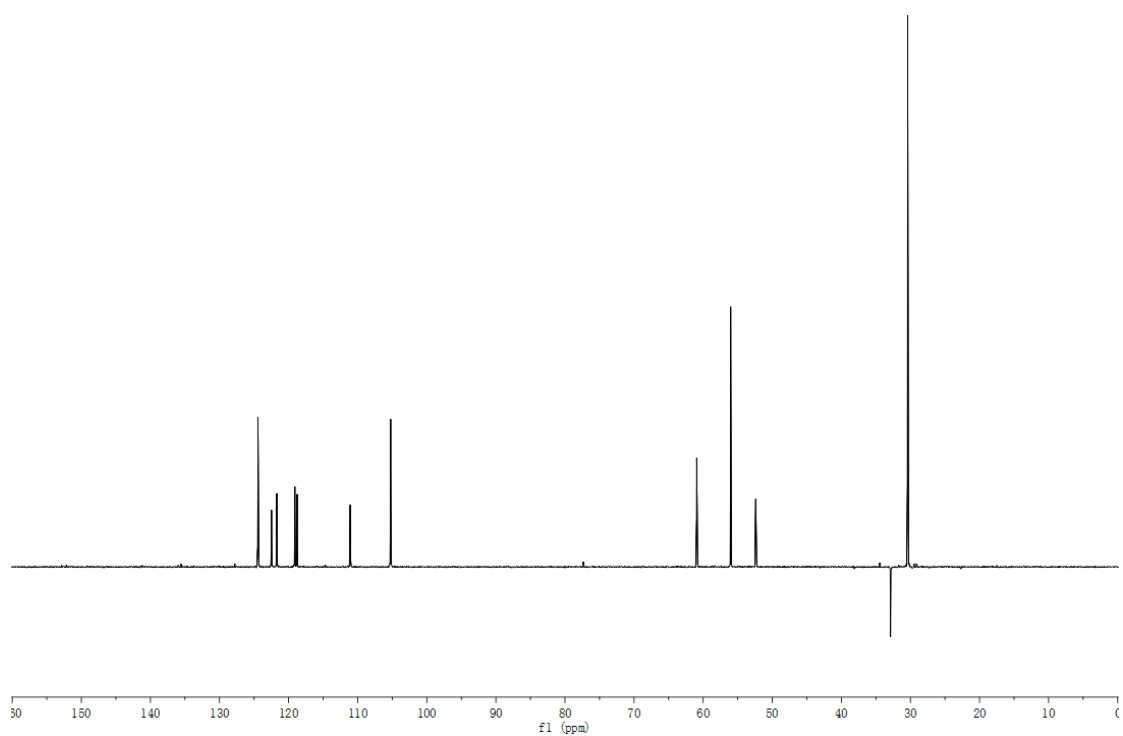

**2,6-di-tert-butyl-4-(1-(3-hydroxy-4-methoxyphenyl)-2-(1H-indol-3-yl)ethyl)phenol (13)**

**<sup>1</sup>H NMR (400 MHz, CDCl<sub>3</sub>):**

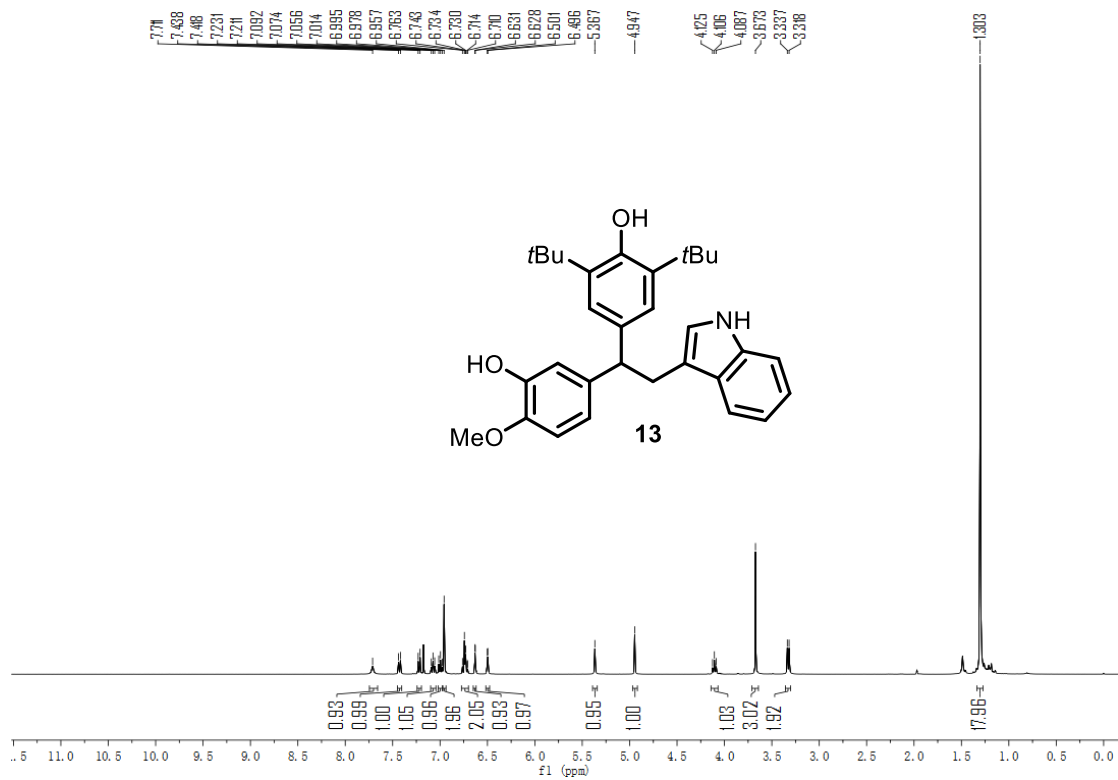

**<sup>13</sup>C NMR (100 MHz, CDCl<sub>3</sub>):**

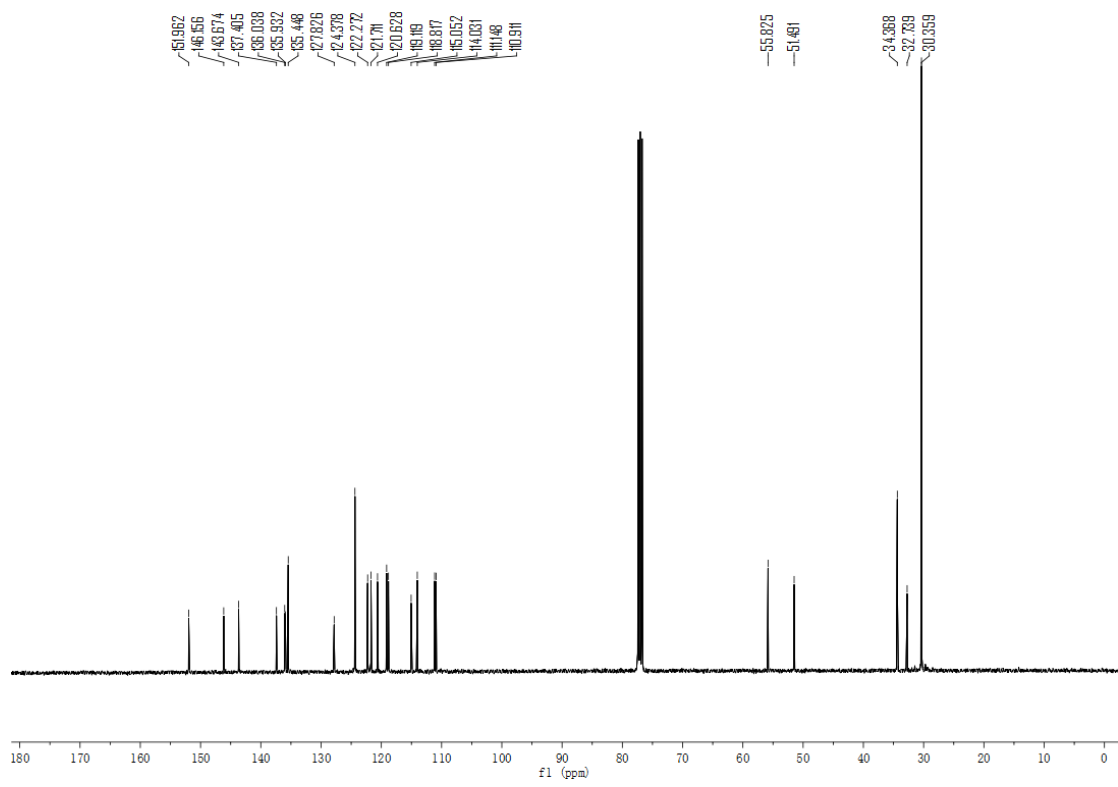

# DEPT

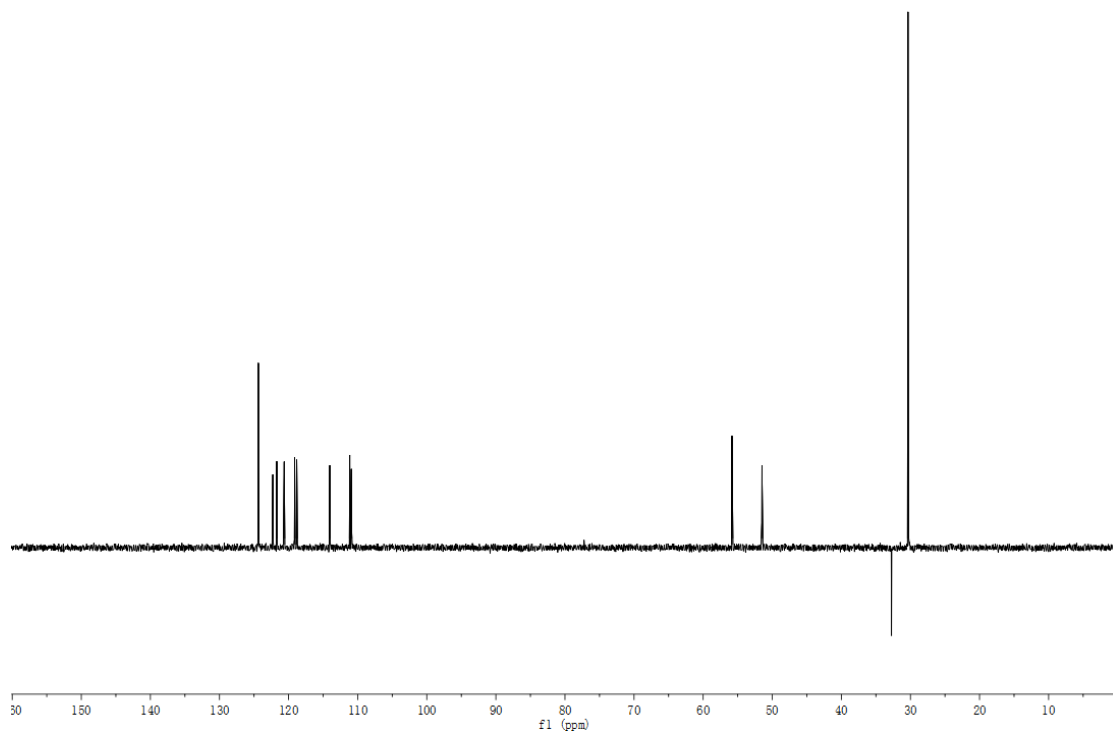

**4-(2-(1H-indol-3-yl)-1-(4-(4,4,5,5-tetramethyl-1,3,2-dioxaborolan-2-yl)phenyl)ethyl)-2,6-di-tert-butylphenol (14)**

**<sup>1</sup>H NMR (400 MHz, CDCl<sub>3</sub>):**

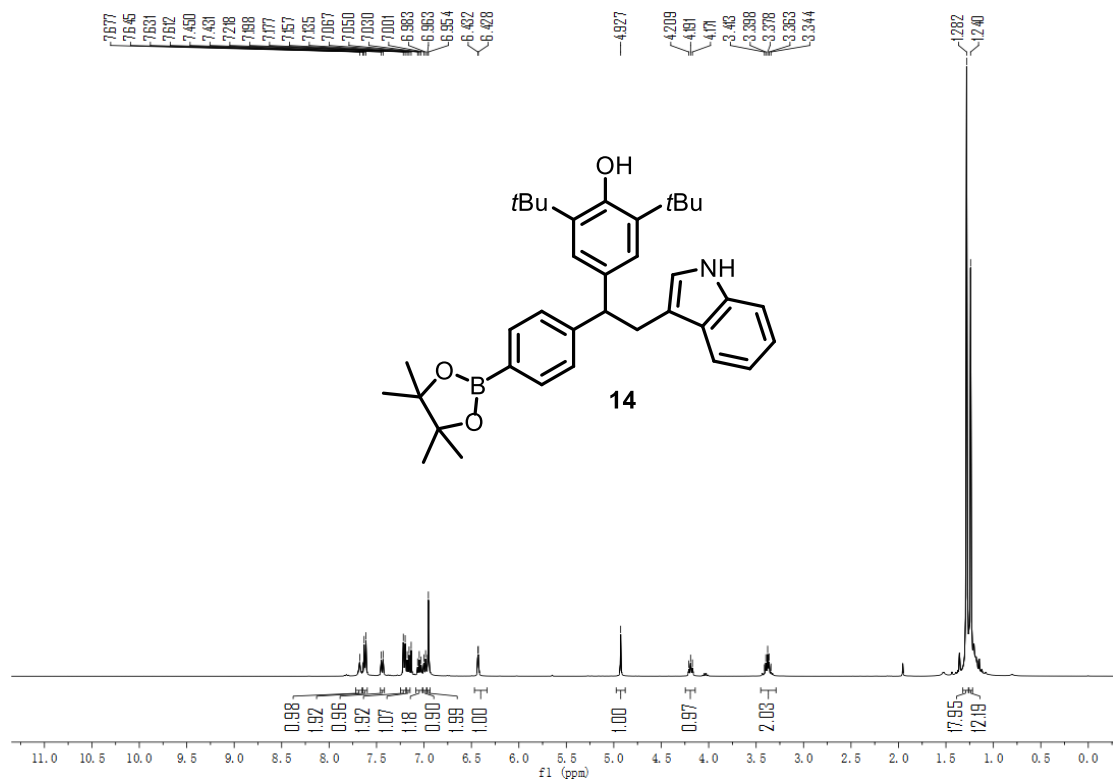

**<sup>13</sup>C NMR (100 MHz, CDCl<sub>3</sub>):**

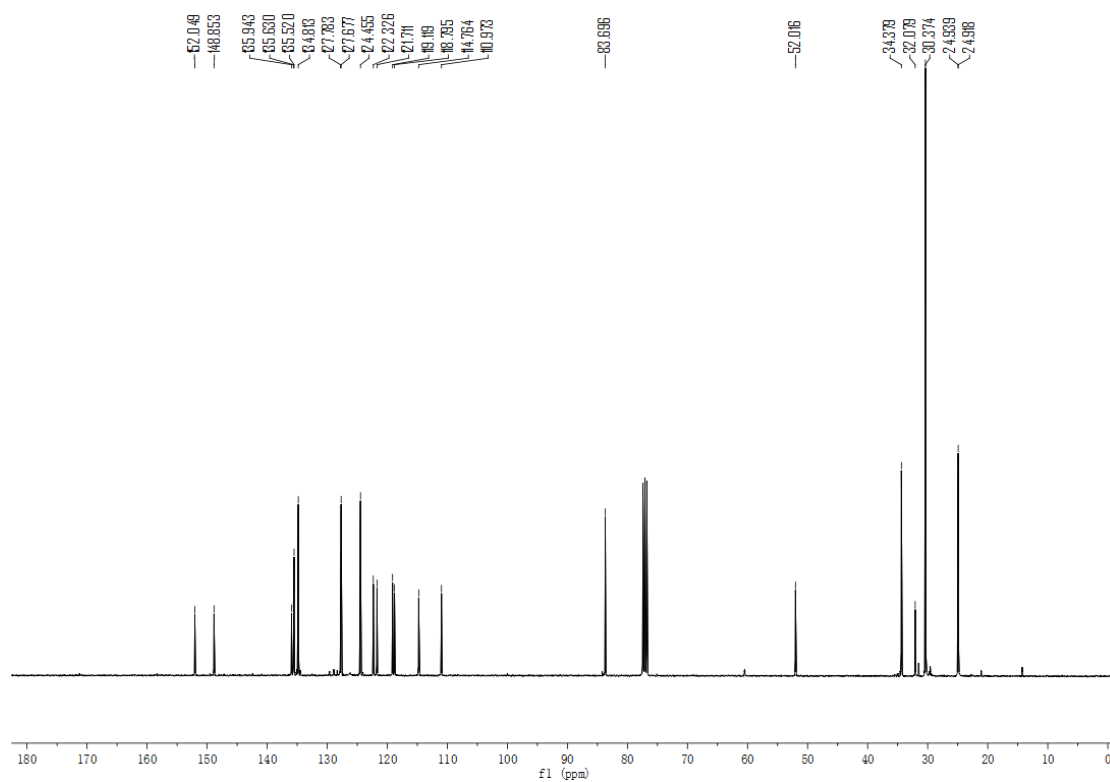

**DEPT**

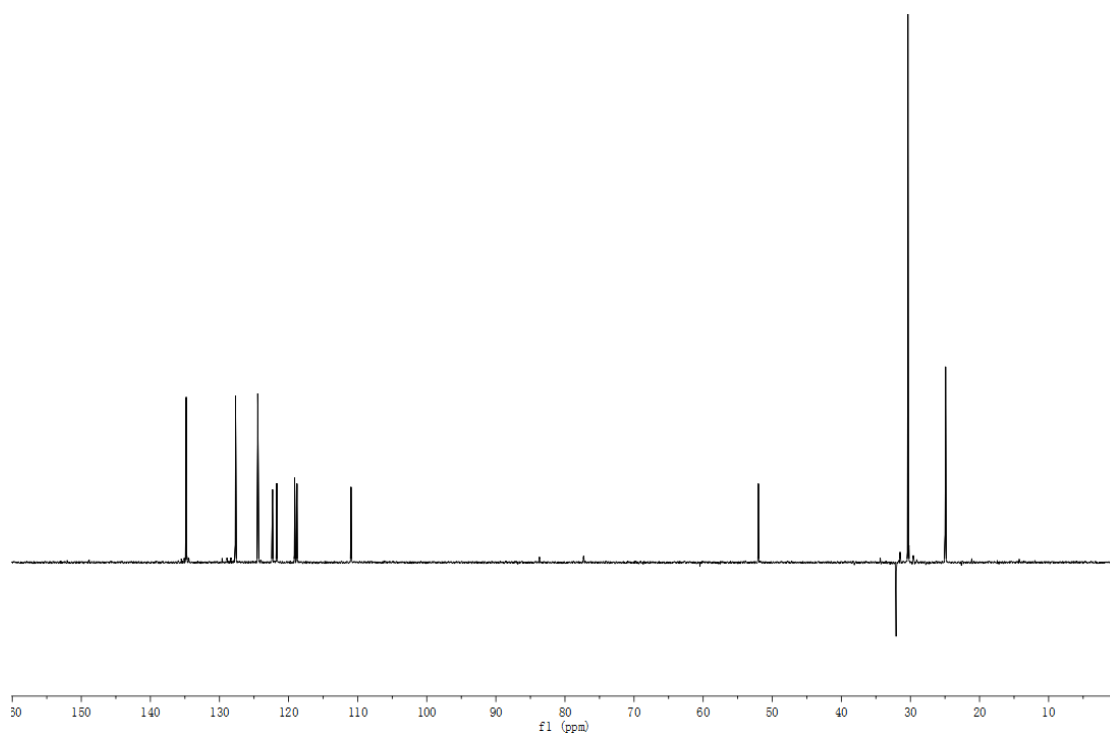

**4-(1-([1,1'-biphenyl]-4-yl)-2-(1H-indol-3-yl)ethyl)-2,6-di-tert-butylphenol (15)**

**<sup>1</sup>H NMR (400 MHz, CDCl<sub>3</sub>):**

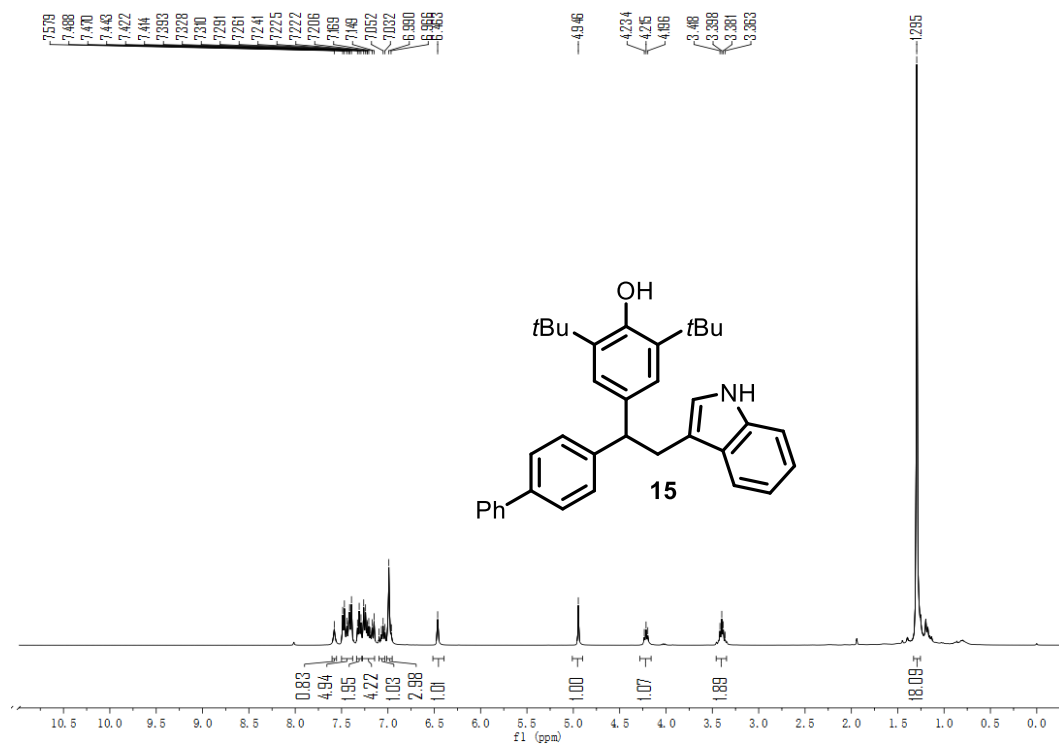

<sup>13</sup>C NMR (100 MHz, CDCl<sub>3</sub>):

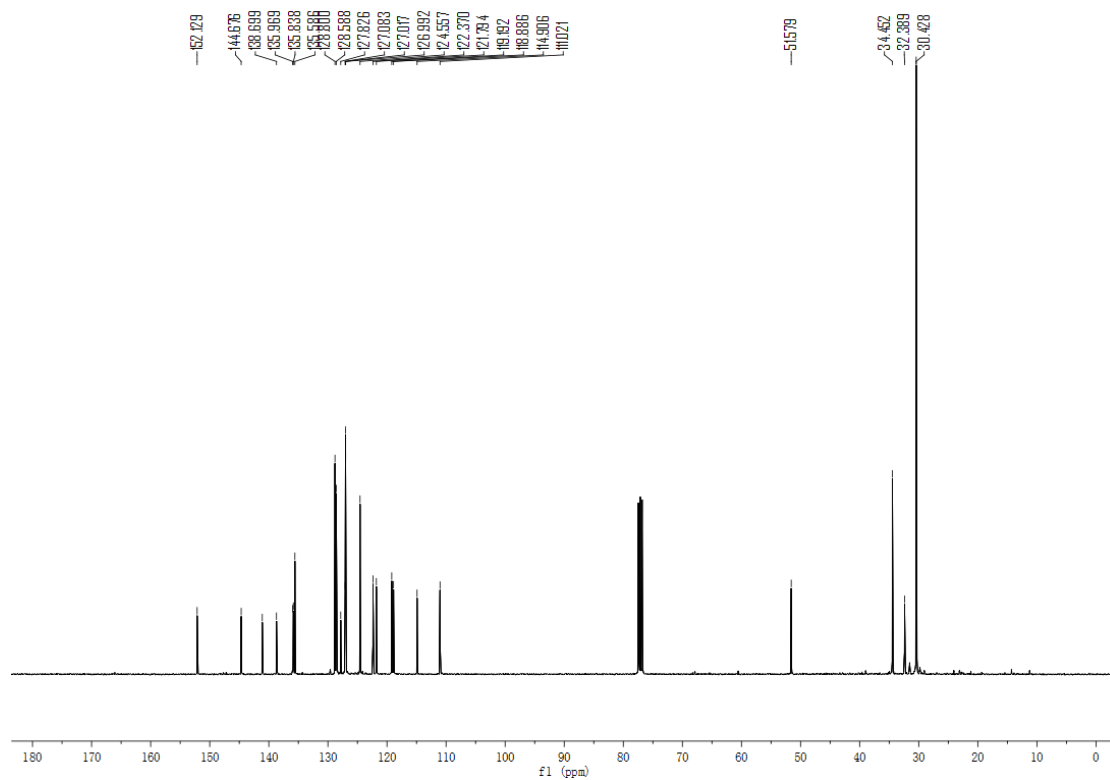

**4-(2-(1H-indol-3-yl)-1-(naphthalen-2-yl)ethyl)-2,6-di-tert-butylphenol (16)**

<sup>1</sup>H NMR (400 MHz, CDCl<sub>3</sub>):



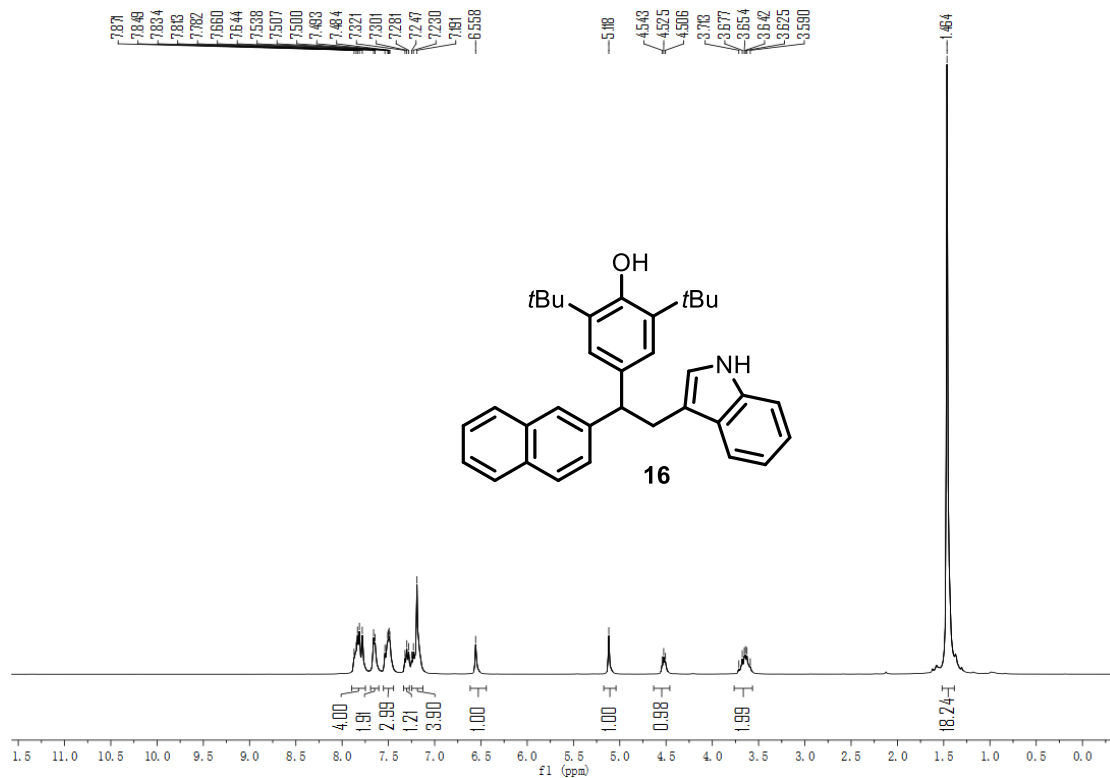

<sup>13</sup>C NMR (100 MHz, CDCl<sub>3</sub>):

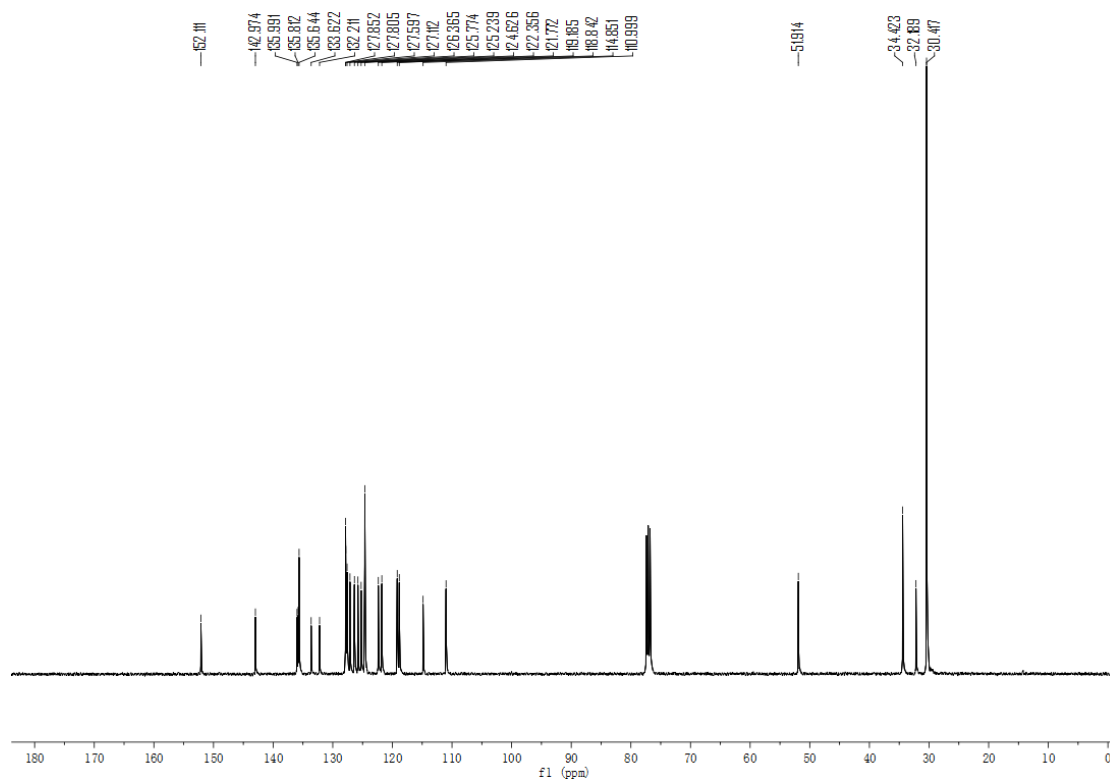

*DEPT*

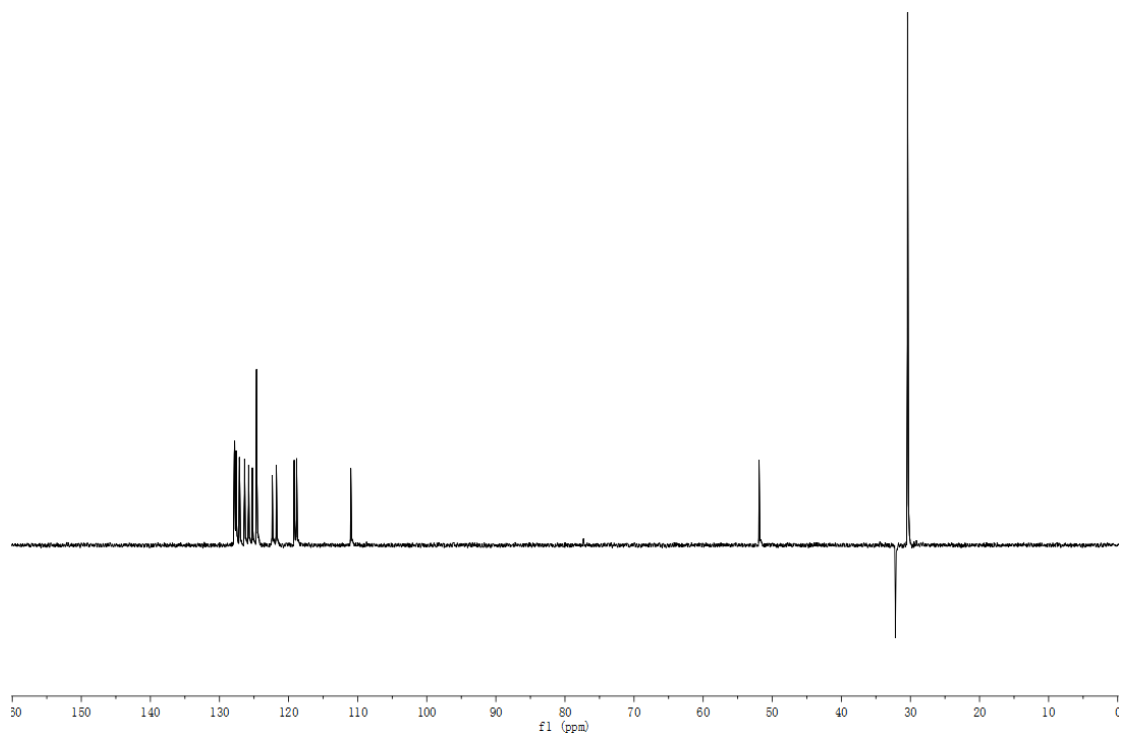

**4-(2-(1H-indol-3-yl)-1-(pyren-1-yl)ethyl)-2,6-di-tert-butylphenol (17)**

**<sup>1</sup>H NMR (400 MHz, CDCl<sub>3</sub>):**

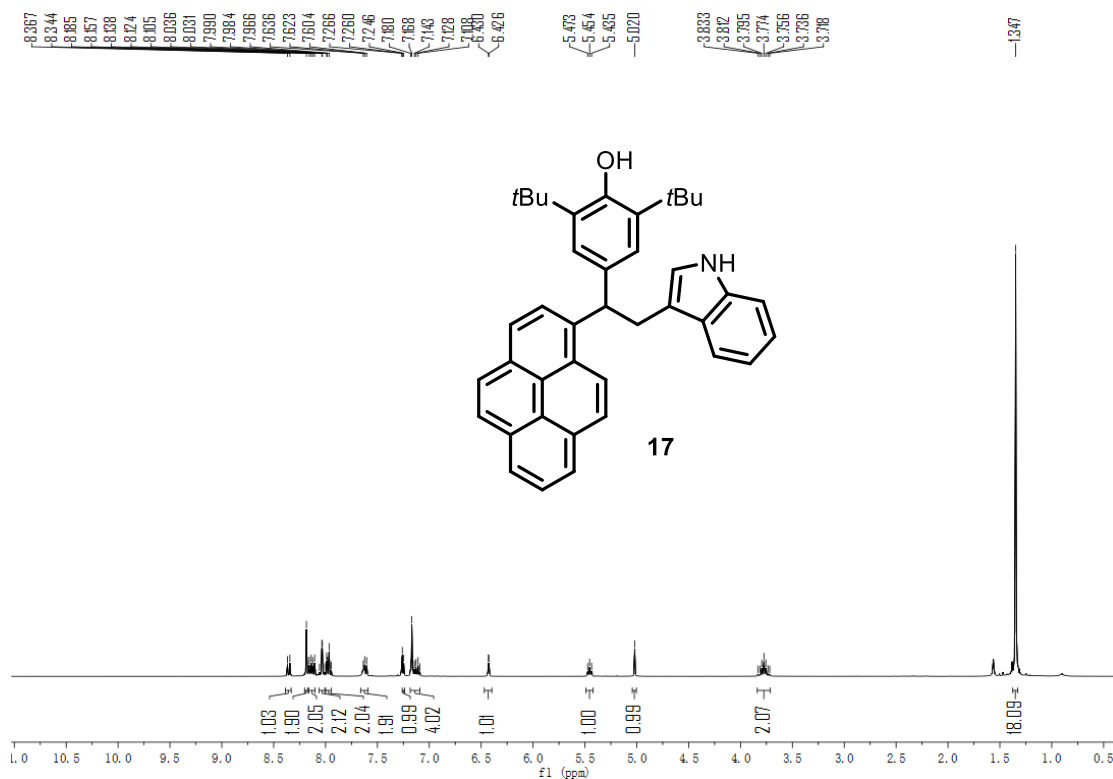

**<sup>13</sup>C NMR (100 MHz, CDCl<sub>3</sub>):**

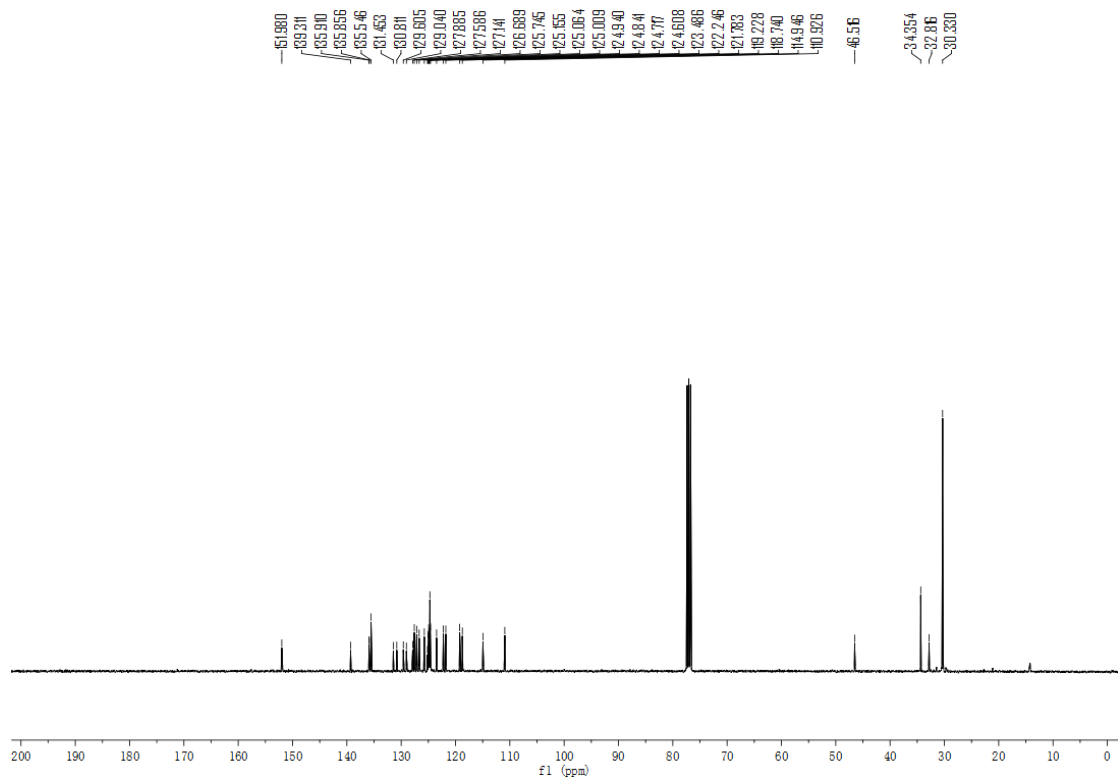

**DEPT**

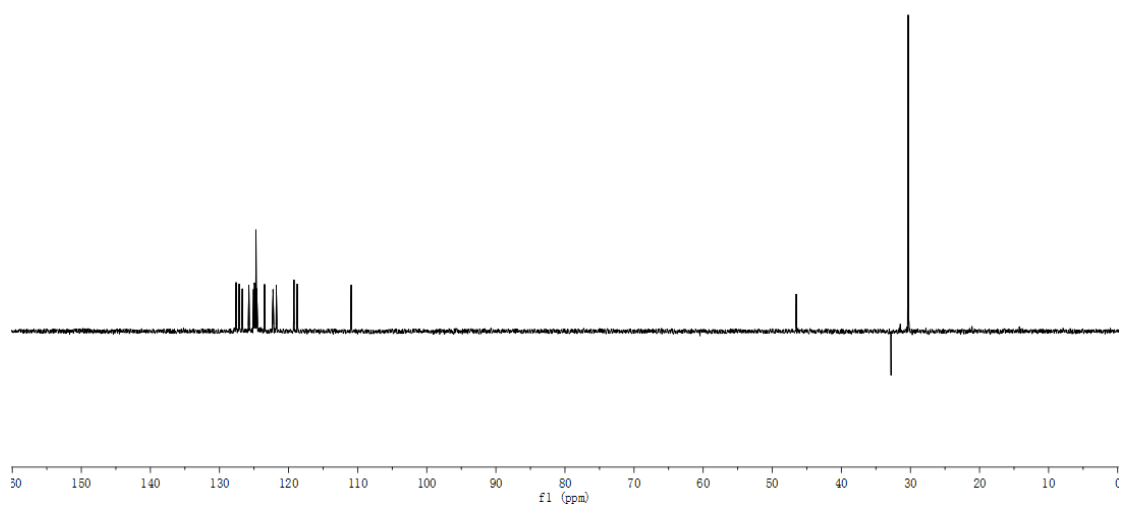

**2,6-di-tert-butyl-4-(1-(4-fluorophenyl)-2-(1H-indol-3-yl)ethyl)phenol (18)**  
<sup>1</sup>H NMR (400 MHz, CDCl<sub>3</sub>):

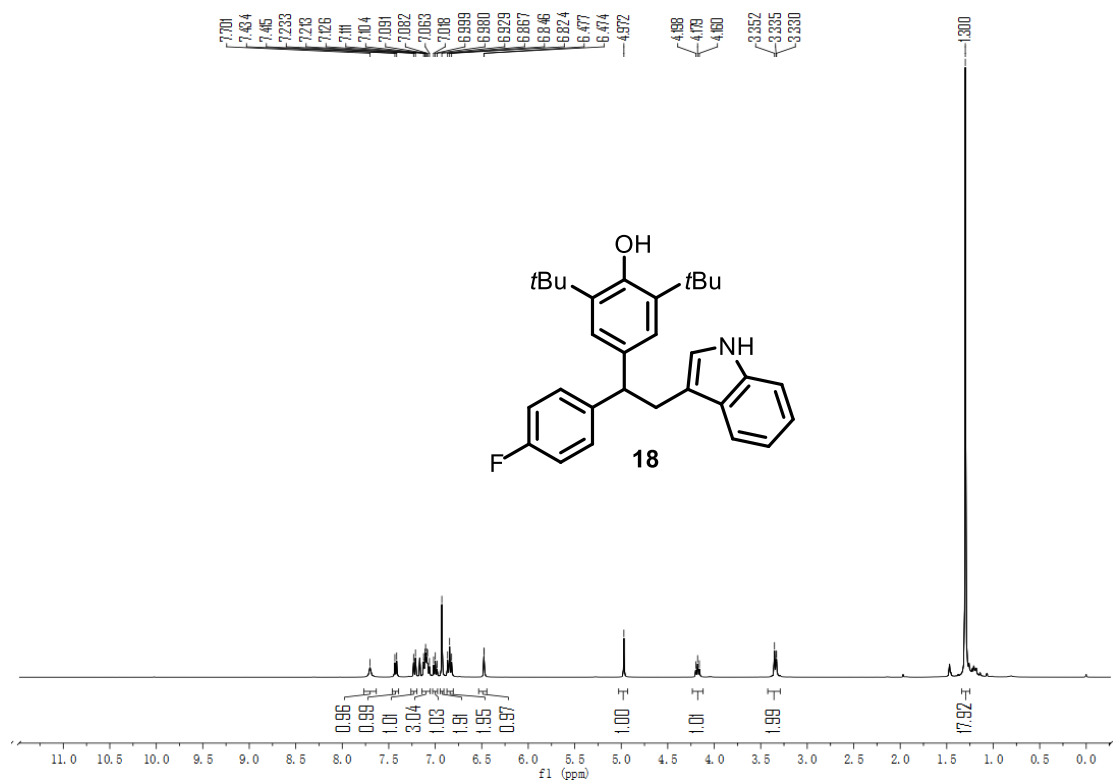

**<sup>13</sup>C NMR (100 MHz, CDCl<sub>3</sub>):**

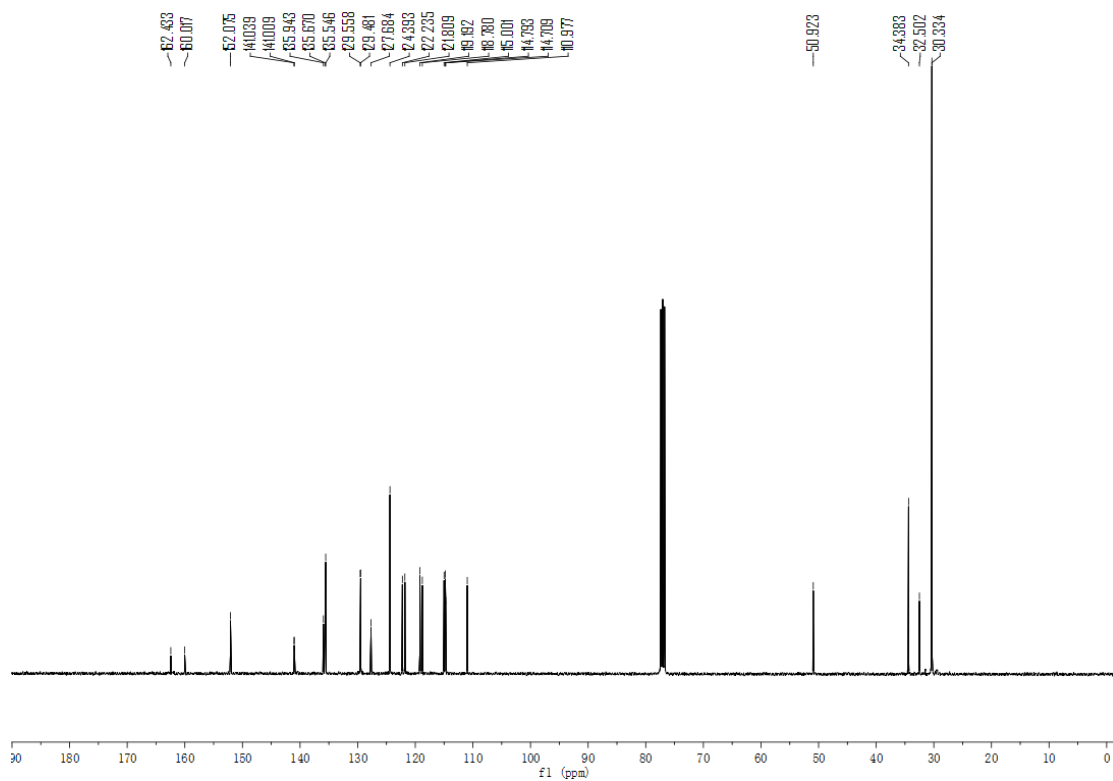

**<sup>19</sup>F NMR (376 MHz, CDCl<sub>3</sub>):**

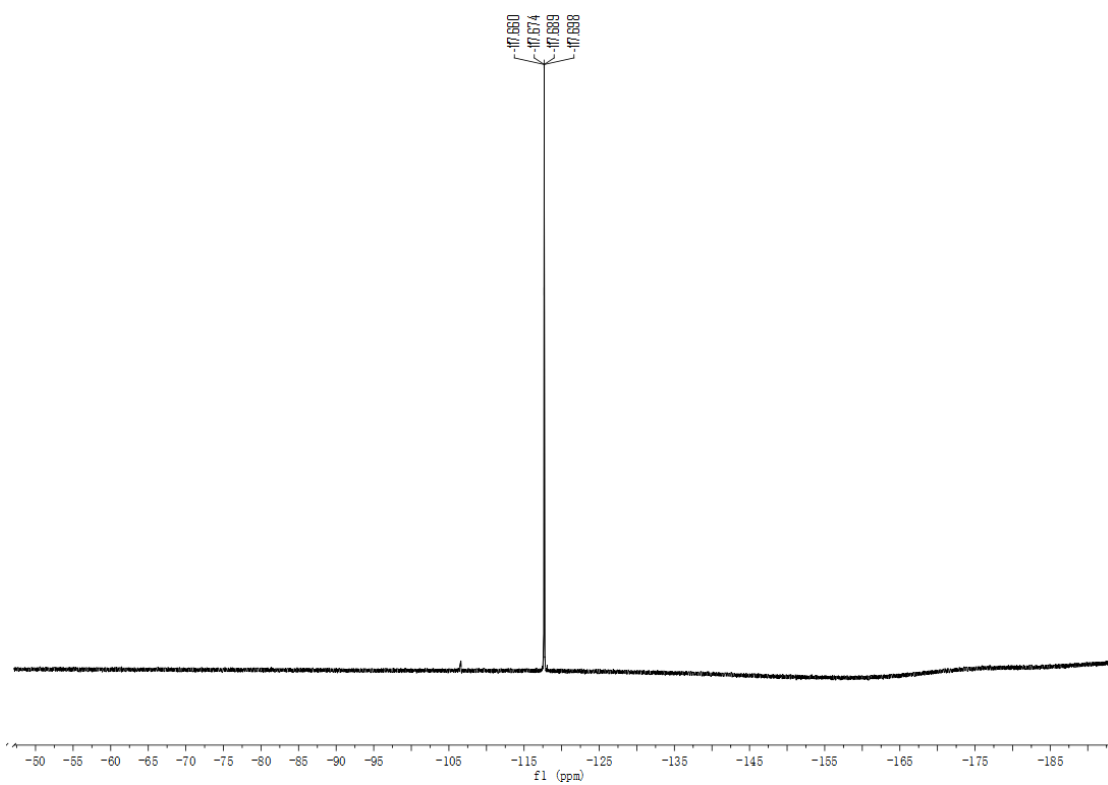

**DEPT**

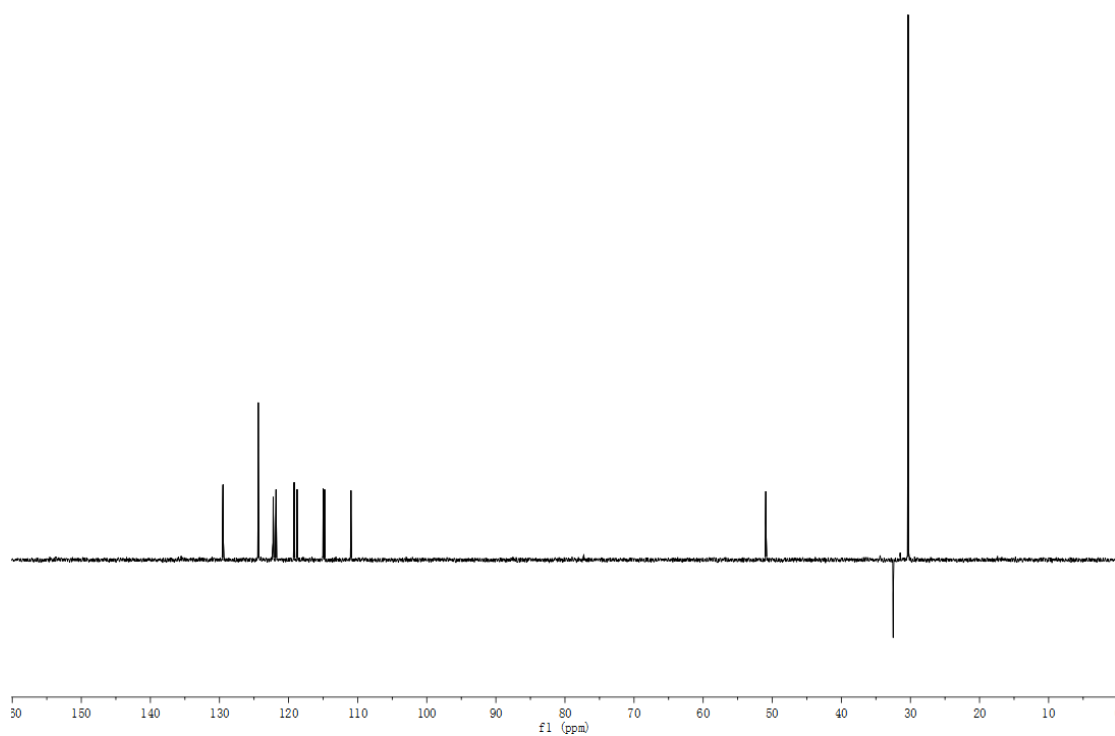

**2,6-di-tert-butyl-4-(1-(4-chlorophenyl)-2-(1H-indol-3-yl)ethyl)phenol (19)**  
**<sup>1</sup>H NMR (400 MHz, CDCl<sub>3</sub>):**

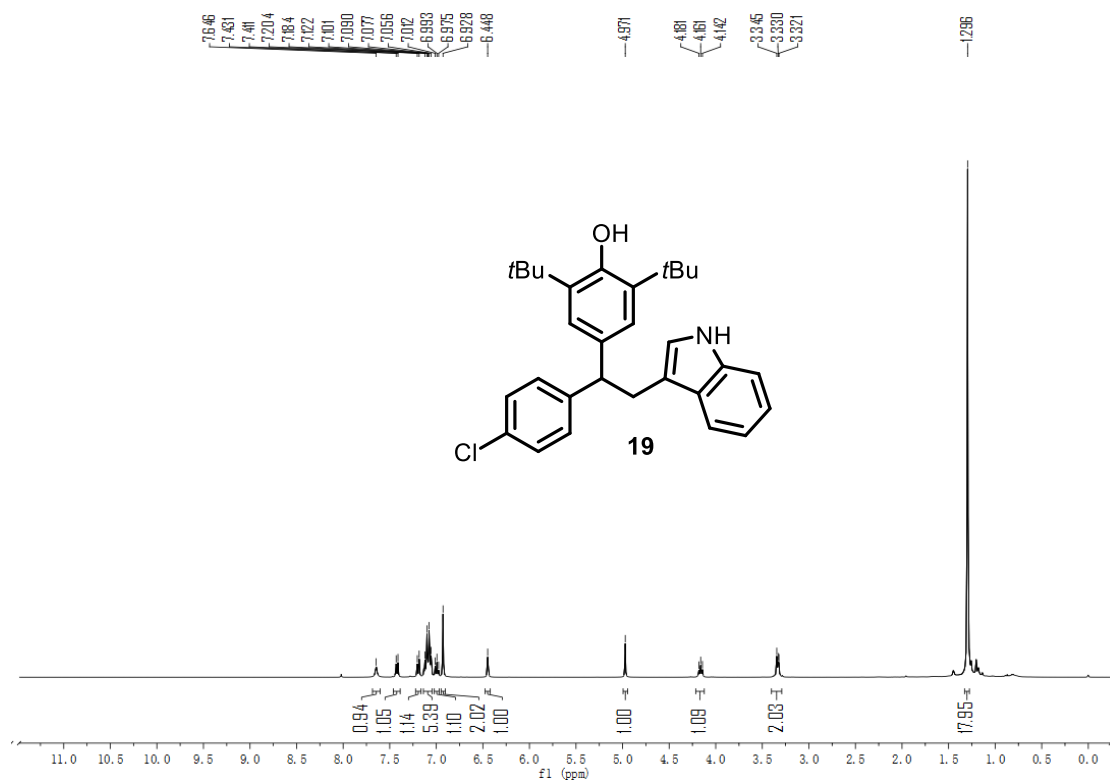

<sup>13</sup>C NMR (100 MHz, CDCl<sub>3</sub>):

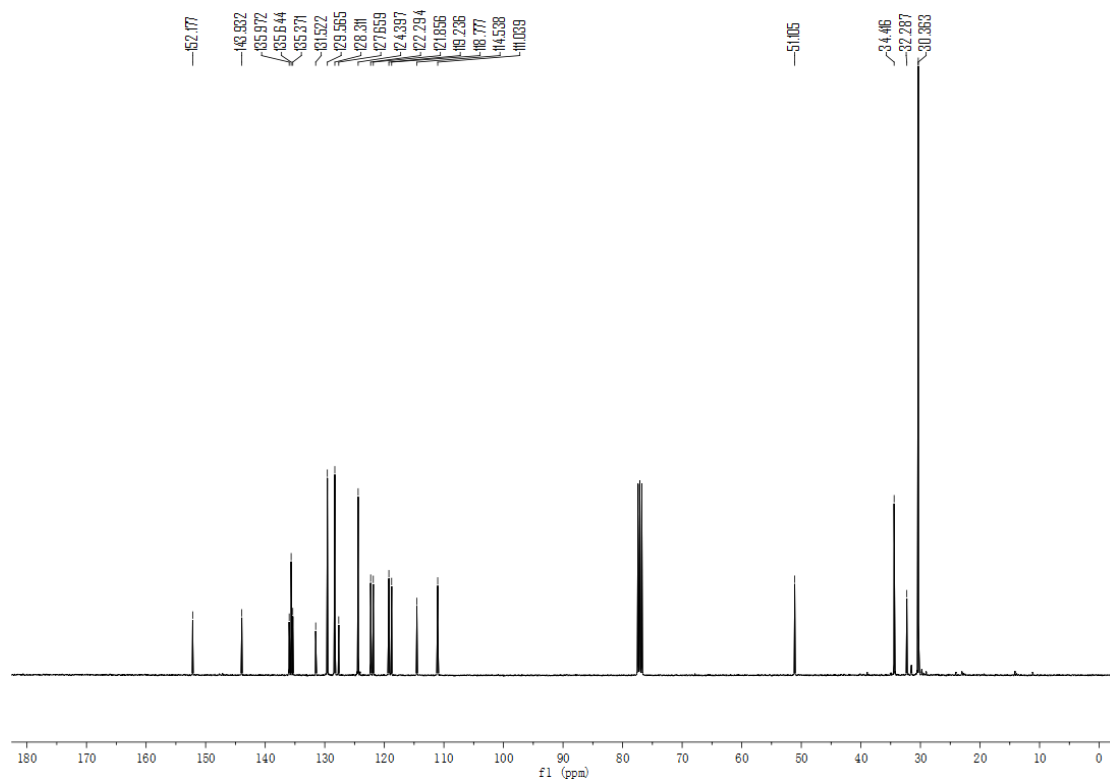

4-(1-(4-bromophenyl)-2-(1H-indol-3-yl)ethyl)-2,6-di-tert-butylphenol (20)

<sup>1</sup>H NMR (400 MHz, CDCl<sub>3</sub>):

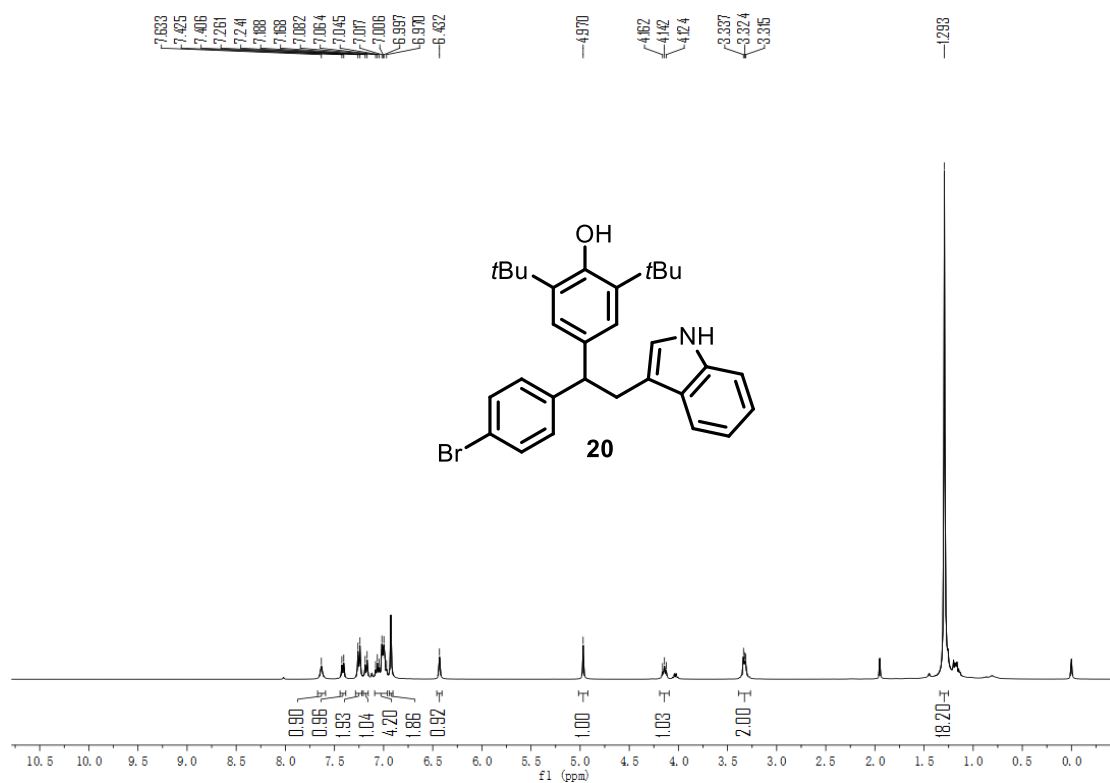

**<sup>13</sup>C NMR (100 MHz, CDCl<sub>3</sub>):**

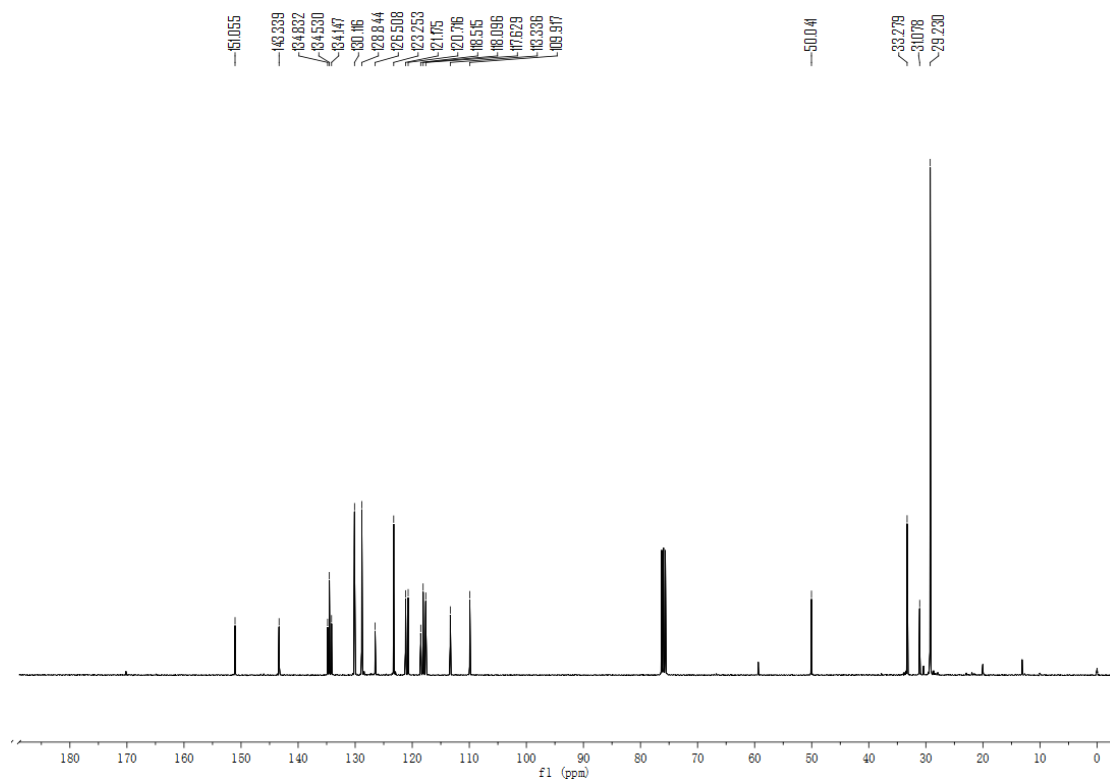

**4-(2-(1H-indol-3-yl)-1-(4-(trifluoromethyl)phenyl)ethyl)-2,6-di-tert-butylphenol (21)**  
**<sup>1</sup>H NMR (400 MHz, CDCl<sub>3</sub>):**

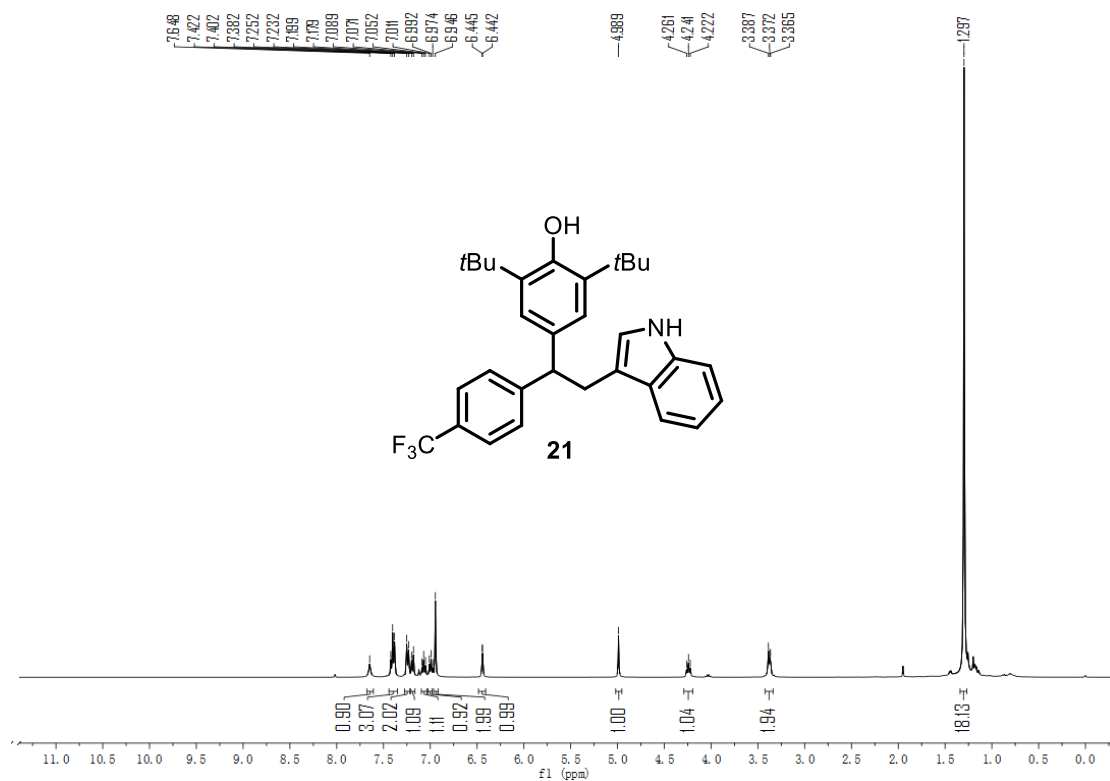

**<sup>13</sup>C NMR (100 MHz, CDCl<sub>3</sub>):**

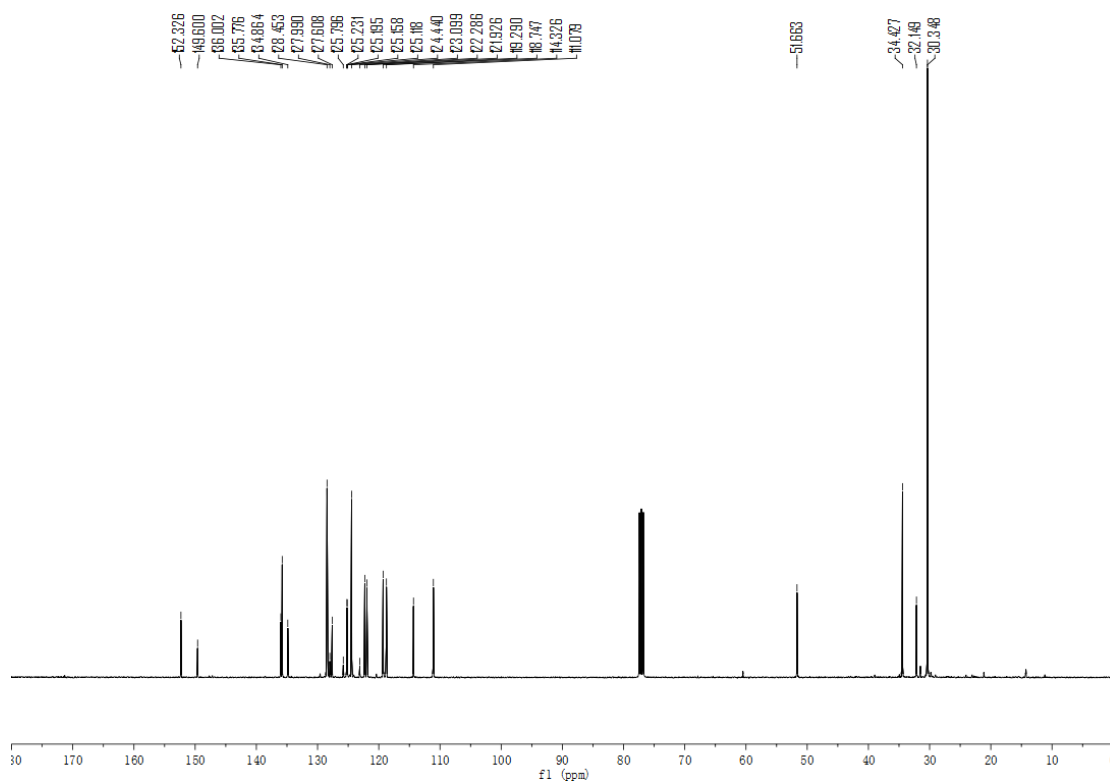

**<sup>19</sup>F NMR (376 MHz, CDCl<sub>3</sub>):**



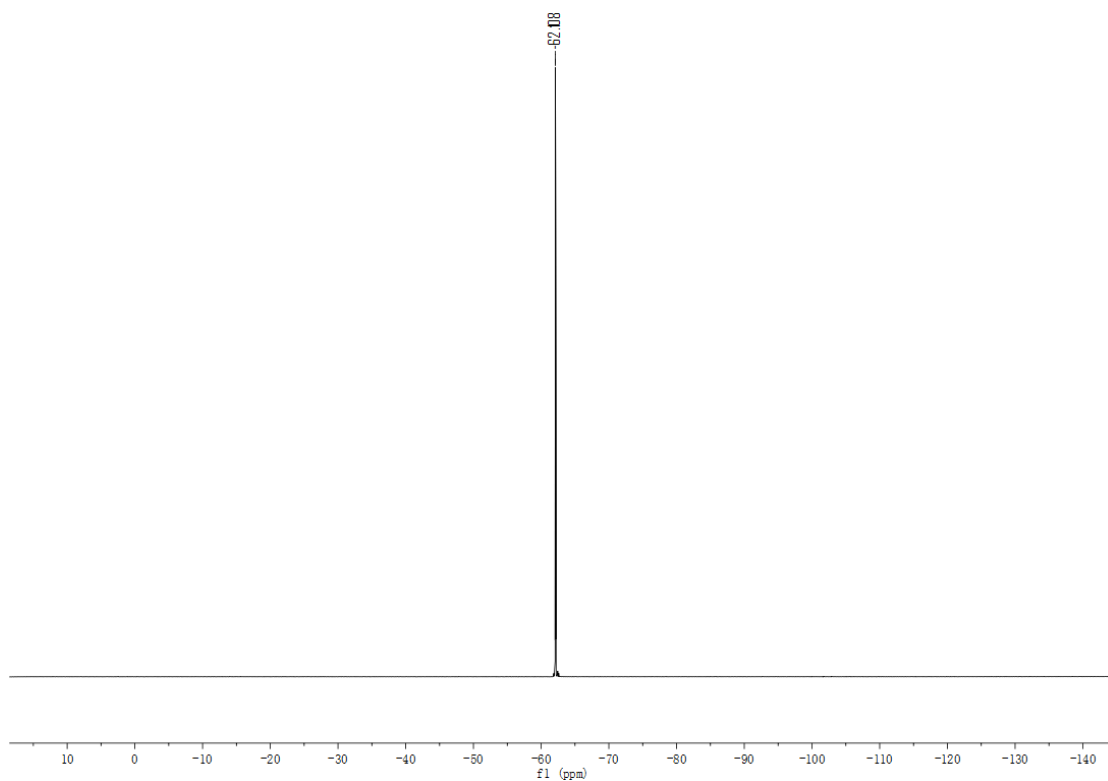

**4-(1-(3,5-di-tert-butyl-4-hydroxyphenyl)-2-(1H-indol-3-yl)ethyl)benzonitrile (22)**  
 $^1\text{H}$  NMR (400 MHz,  $\text{CDCl}_3$ ):

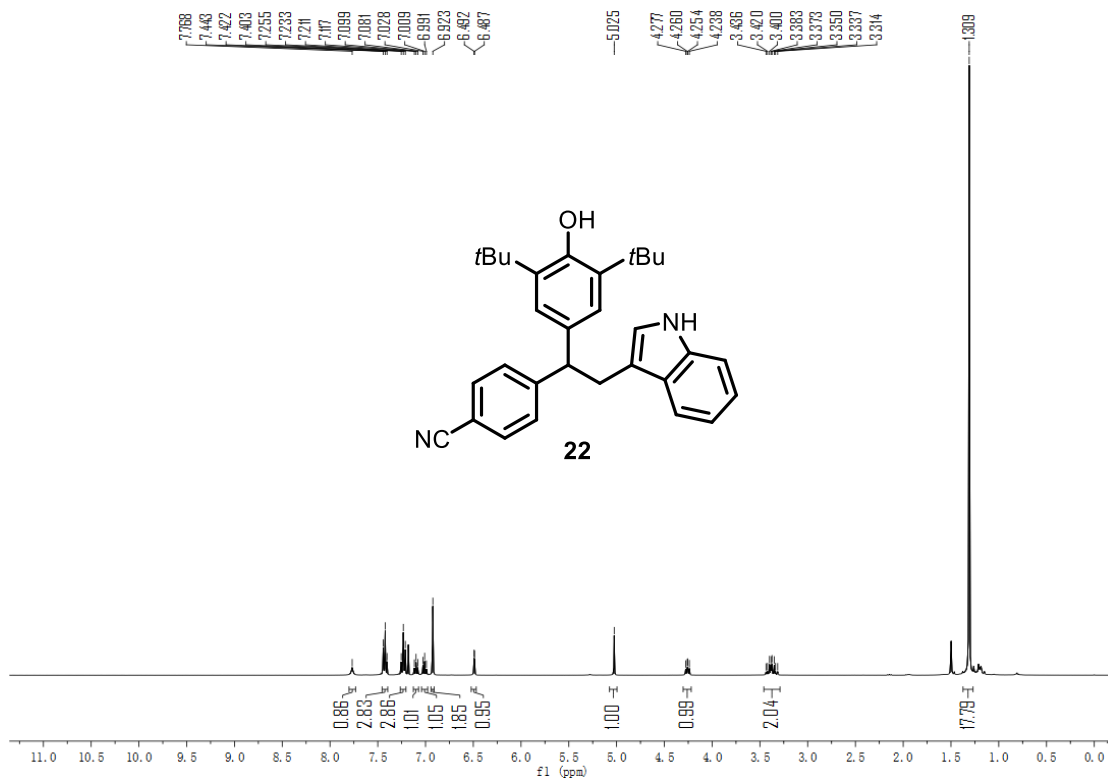

$^{13}\text{C}$  NMR (100 MHz,  $\text{CDCl}_3$ ):

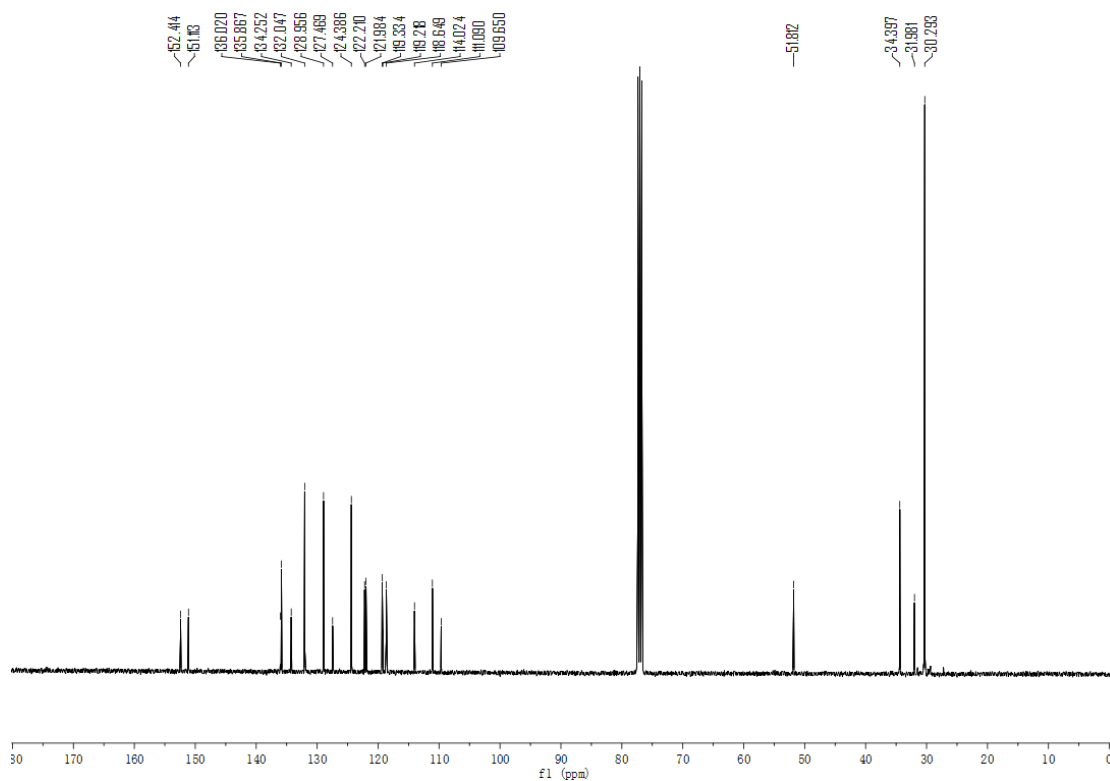

***methyl 4-(1-(3,5-di-tert-butyl-4-hydroxyphenyl)-2-(1H-indol-3-yl)ethyl)benzoate***  
**(23)**

**<sup>1</sup>H NMR (400 MHz, CDCl<sub>3</sub>):**

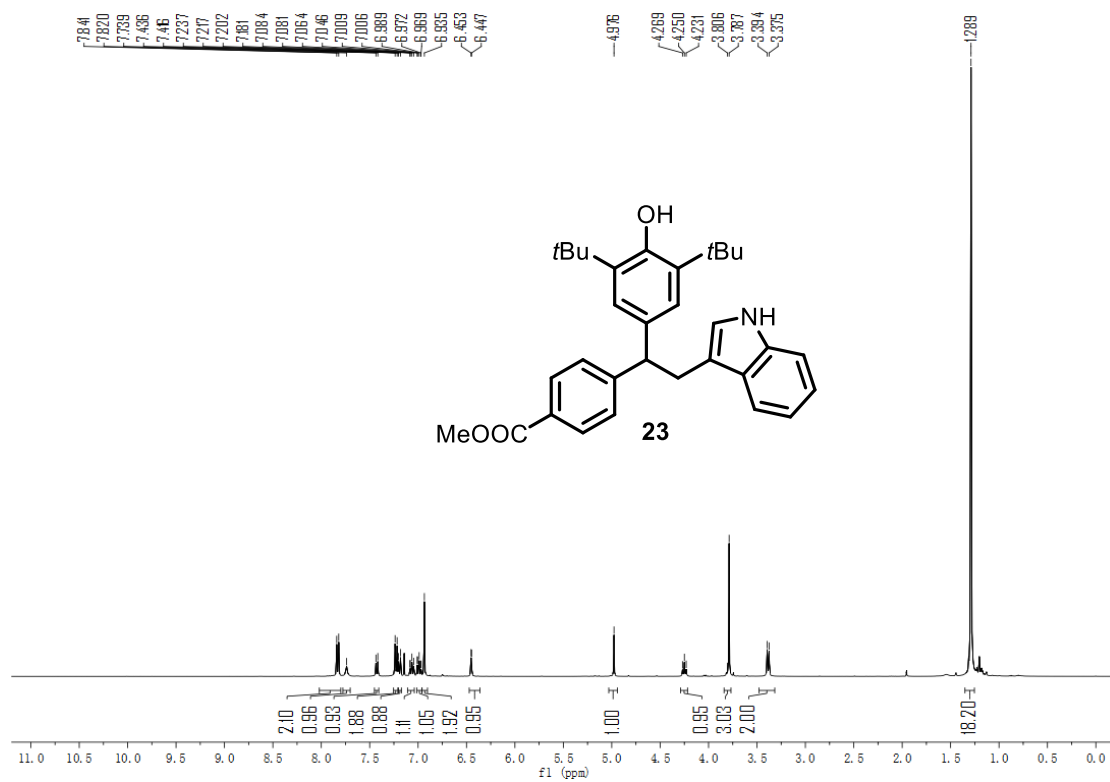

**<sup>13</sup>C NMR (100 MHz, CDCl<sub>3</sub>):**

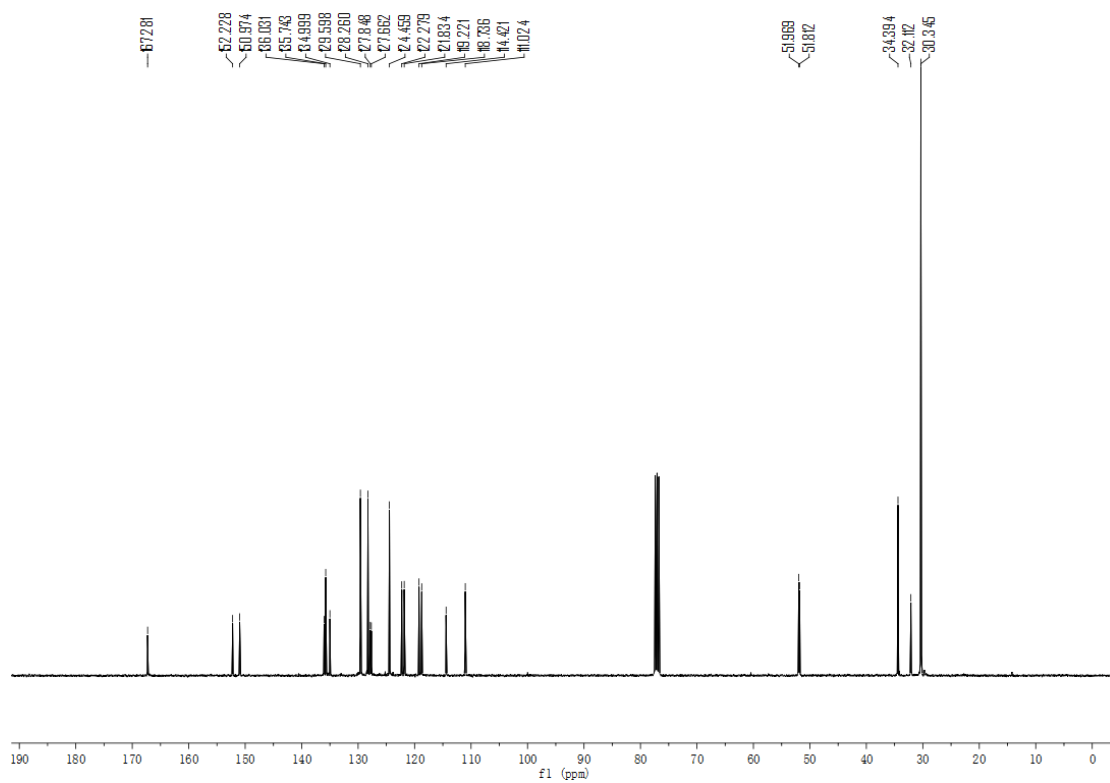

**DEPT**

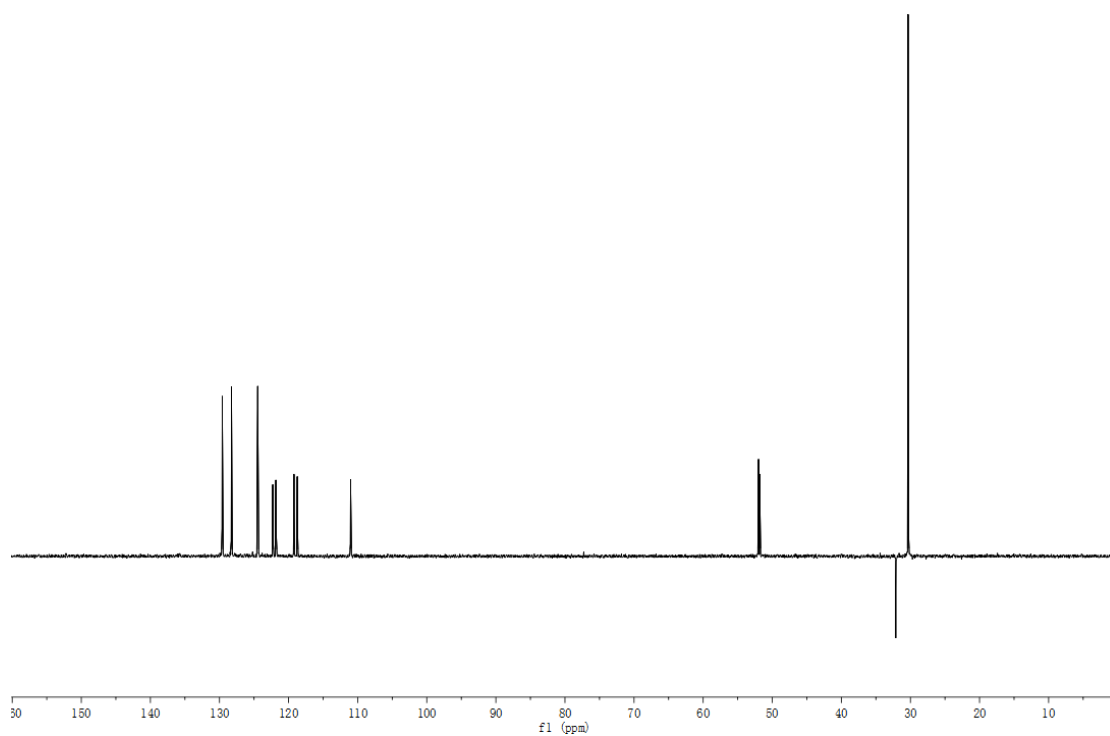

**4-(2-(1H-indol-3-yl)-1-(thiophen-2-yl)ethyl)-2,6-di-tert-butylphenol (24)**

**<sup>1</sup>H NMR (400 MHz, CDCl<sub>3</sub>):**

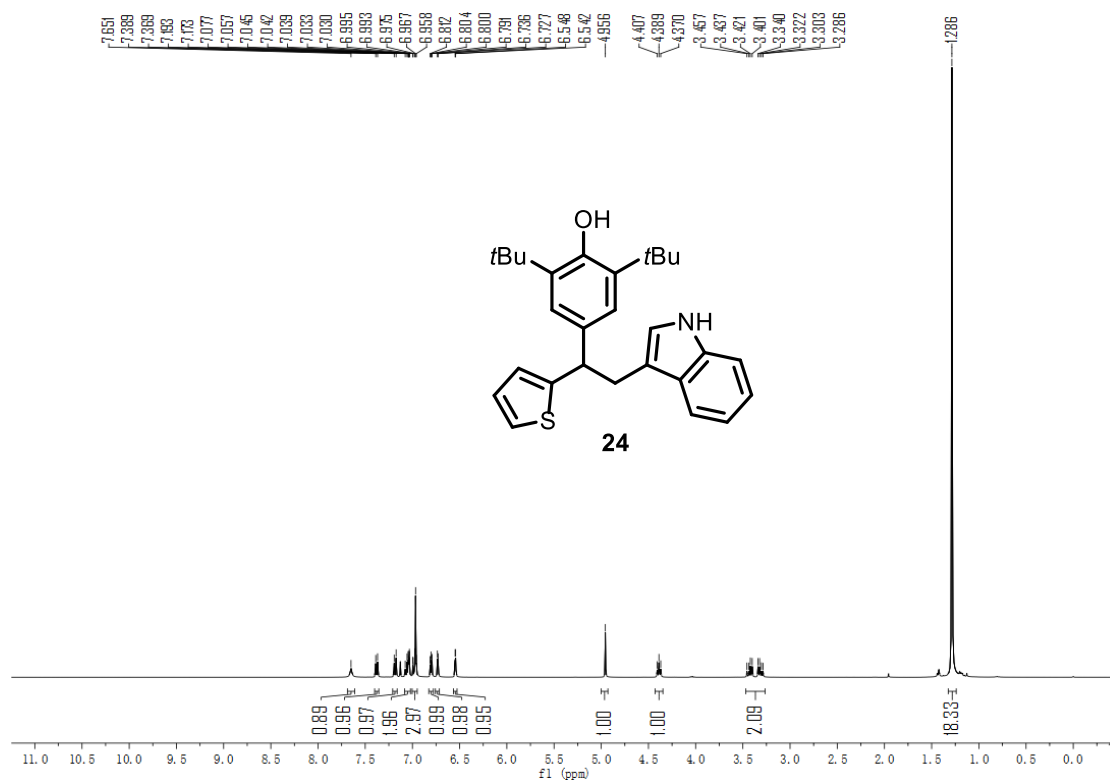

<sup>13</sup>C NMR (100 MHz, CDCl<sub>3</sub>):

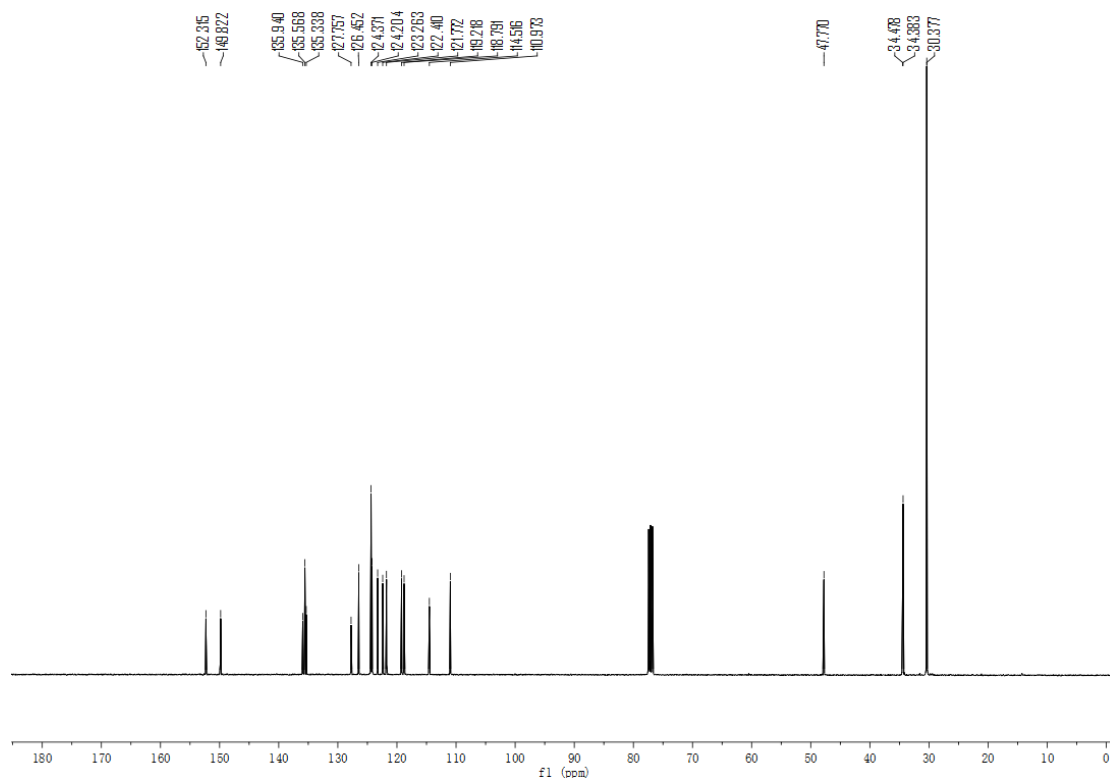

**4-(1-(4-bromothiophen-2-yl)-2-(1H-indol-3-yl)ethyl)-2,6-di-tert-butylphenol (25)**

<sup>1</sup>H NMR (400 MHz, CDCl<sub>3</sub>):

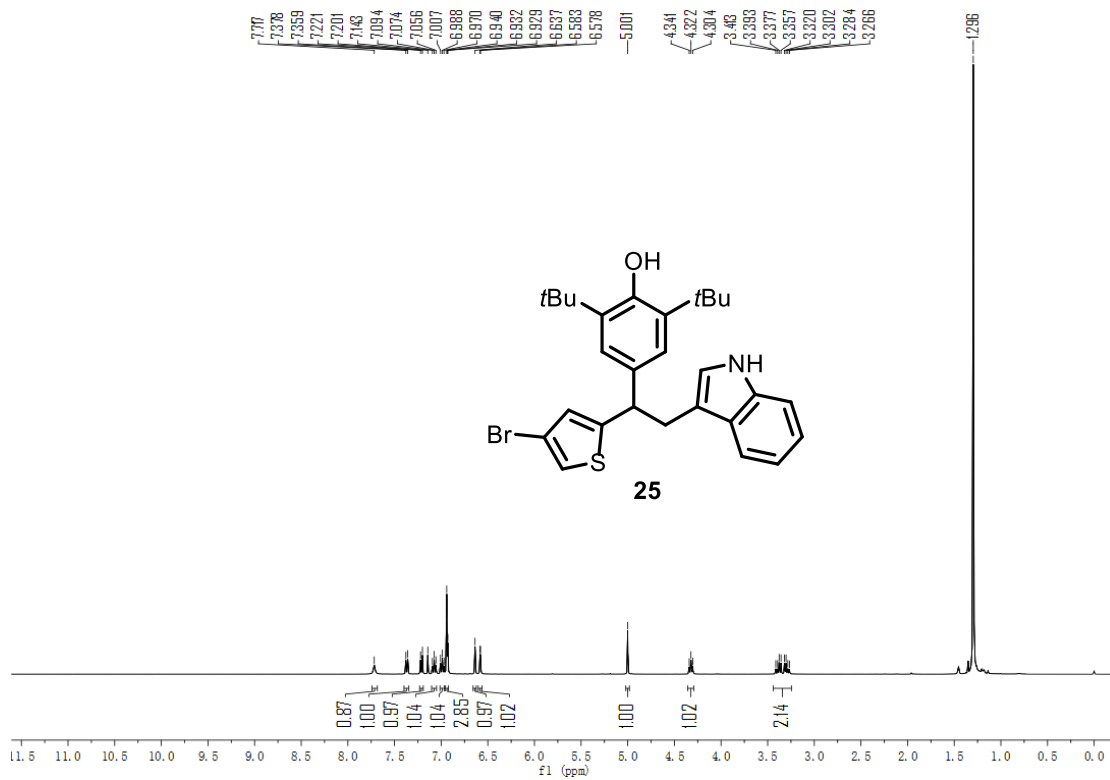

<sup>13</sup>C NMR (100 MHz, CDCl<sub>3</sub>):

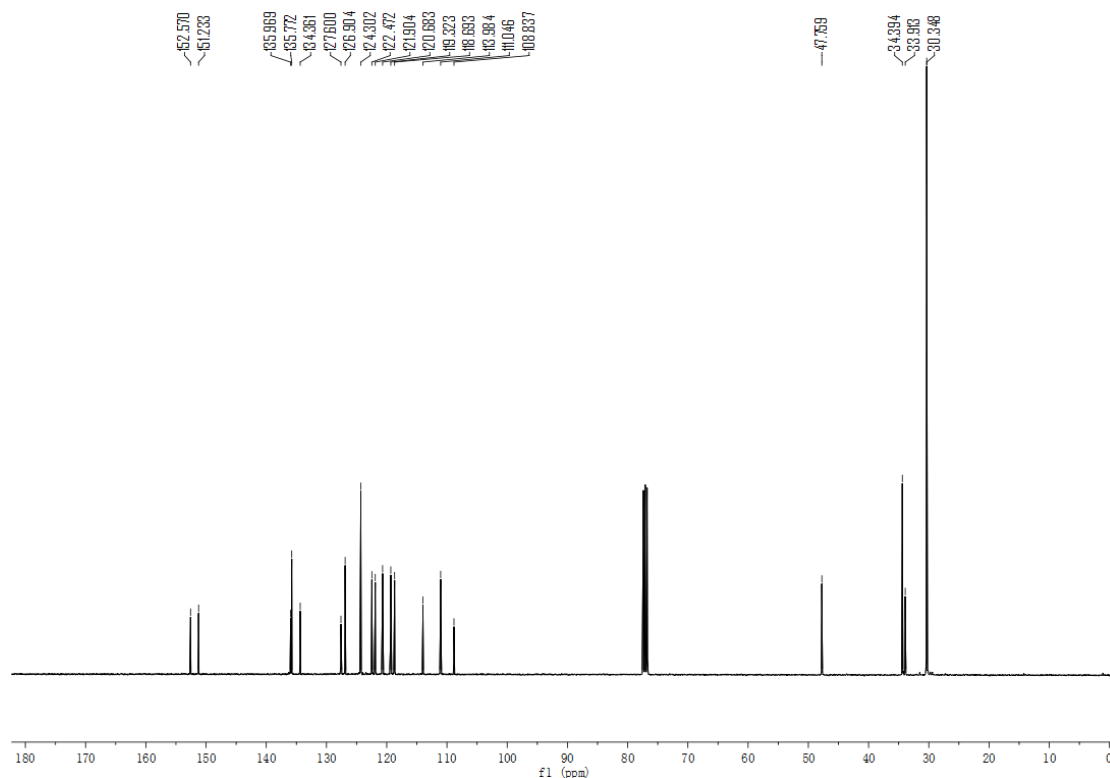

*DEPT*

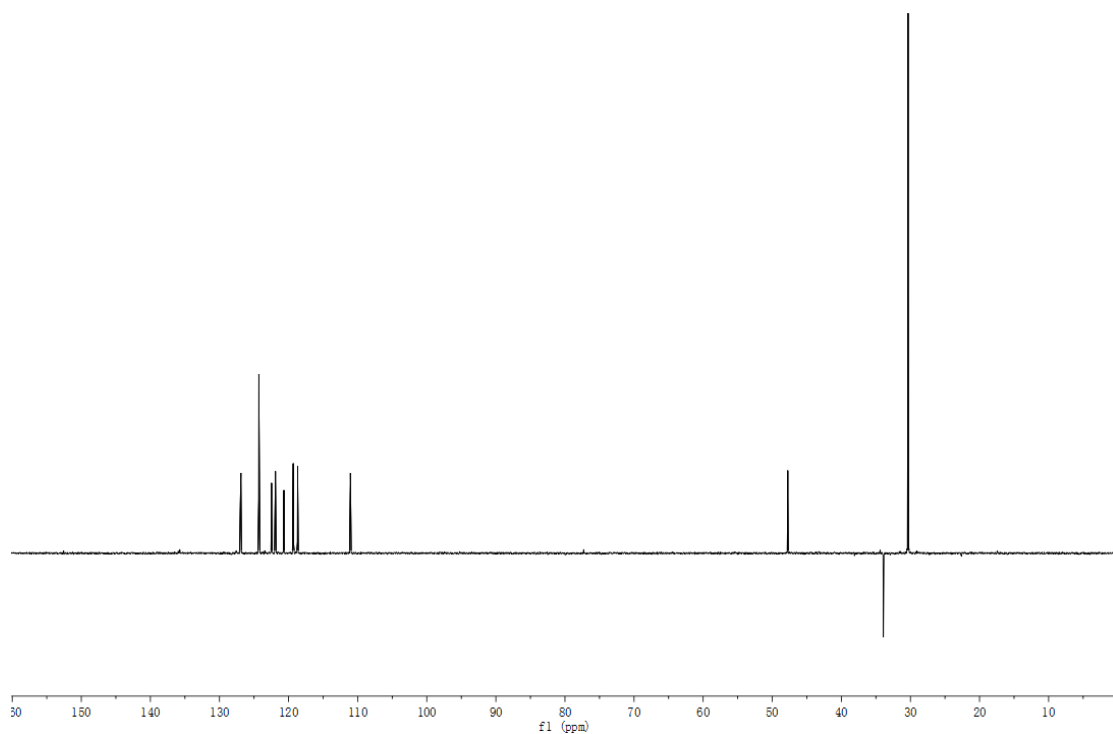

**4-(2-(1H-indol-3-yl)-1-(5-methylfuran-2-yl)ethyl)-2,6-di-tert-butylphenol (26)**

**<sup>1</sup>H NMR (400 MHz, CDCl<sub>3</sub>):**

7.727, 7.349, 7.330, 7.221, 7.201, 7.074, 7.056, 7.037, 6.981, 6.964, 6.944, 6.892, 6.586, 6.580, 5.887, 5.879, 5.780, 5.775, 4.941, 4.111, 4.082, 4.073, 3.442, 3.423, 3.406, 3.387, 3.355, 3.337, 2.950, 1.274

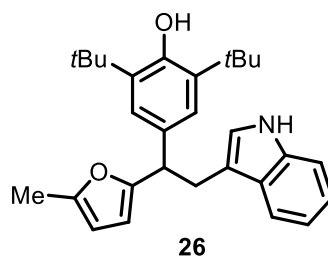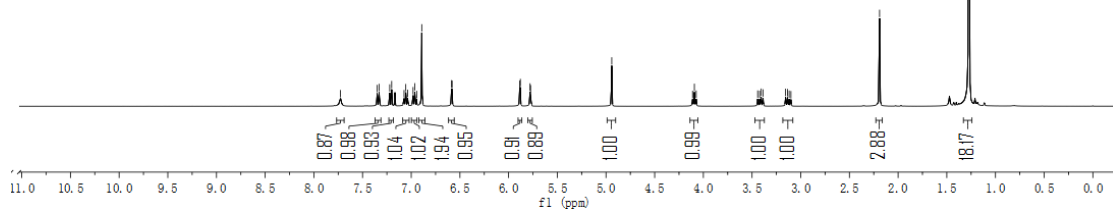

**<sup>13</sup>C NMR (100 MHz, CDCl<sub>3</sub>):**

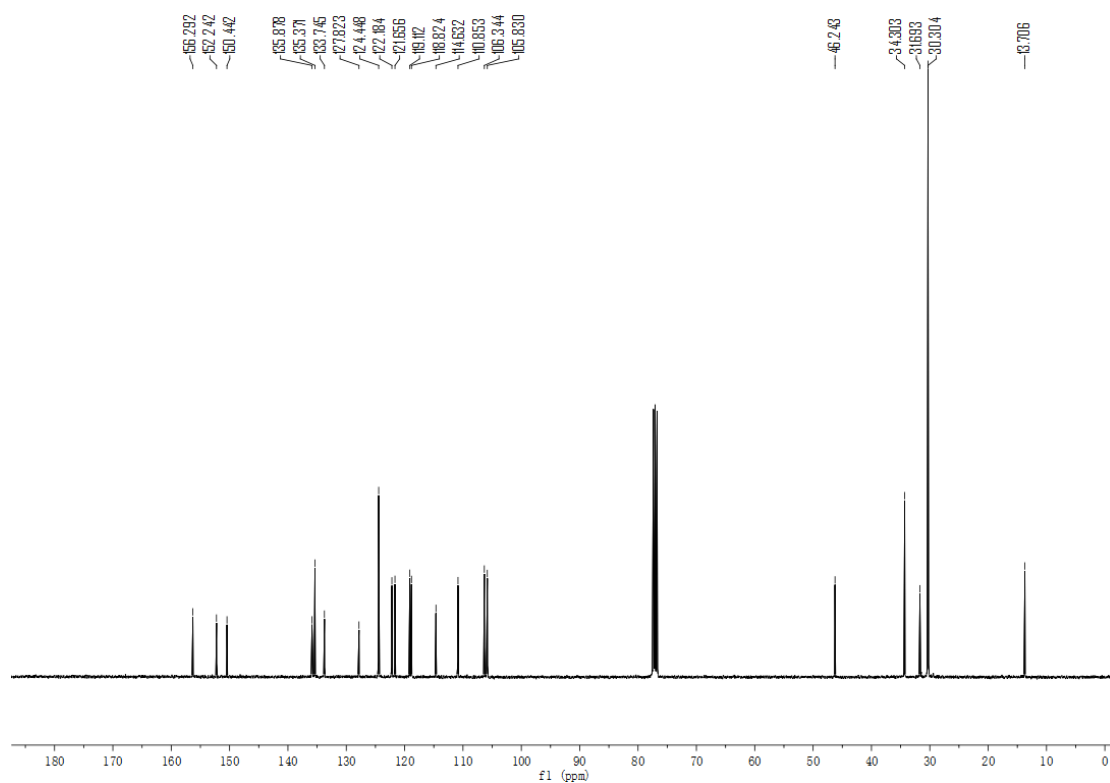

**4-(2-(1H-indol-3-yl)-1-(1-methyl-1H-imidazol-4-yl)ethyl)-2,6-di-tert-butylphenol (27)**

**<sup>1</sup>H NMR (400 MHz, CDCl<sub>3</sub>):**

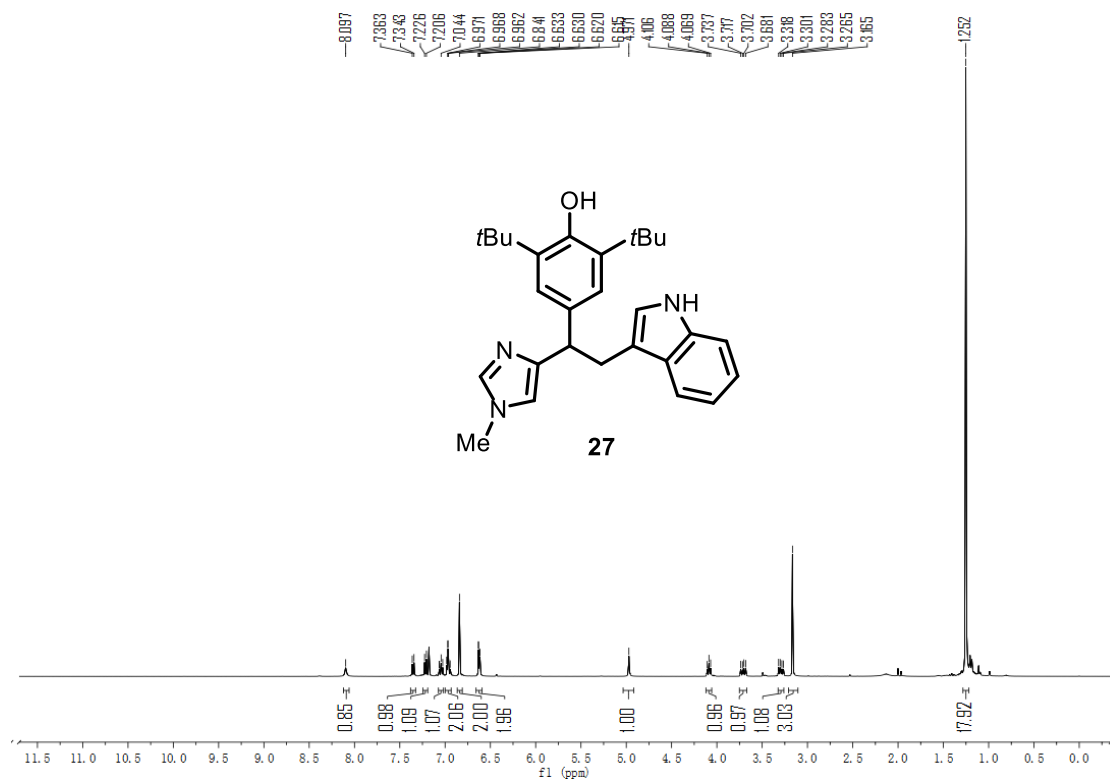

**<sup>13</sup>C NMR (100 MHz, CDCl<sub>3</sub>):**

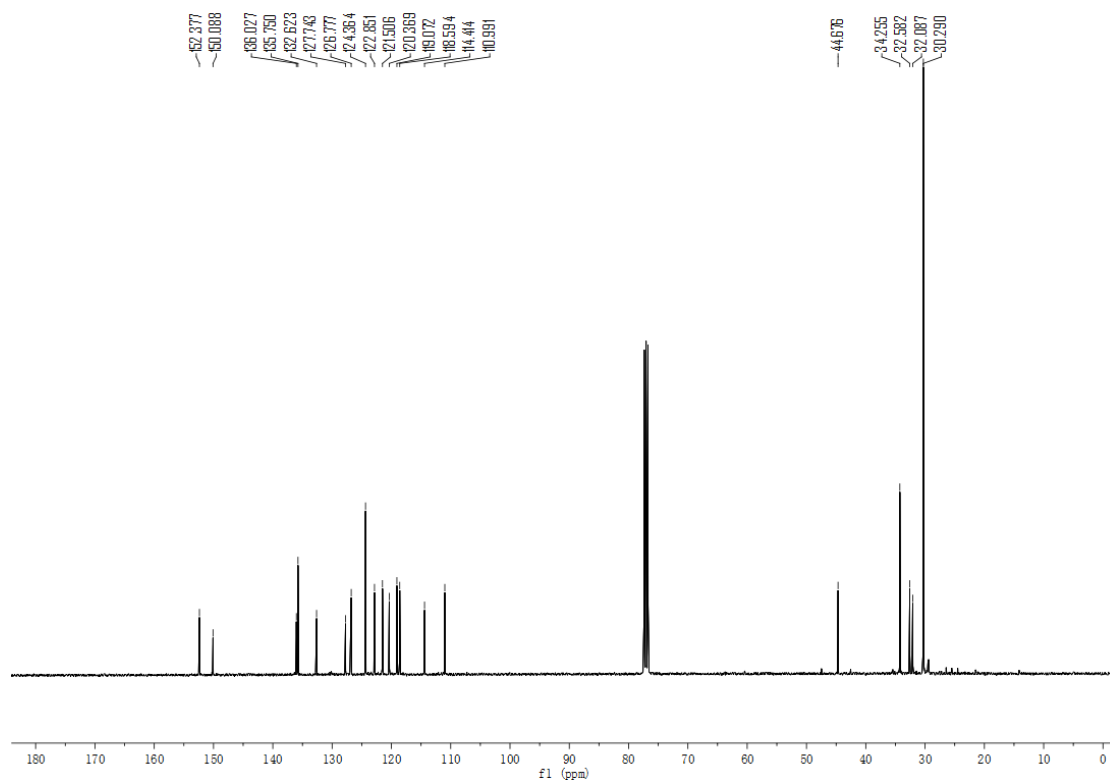

**DEPT**

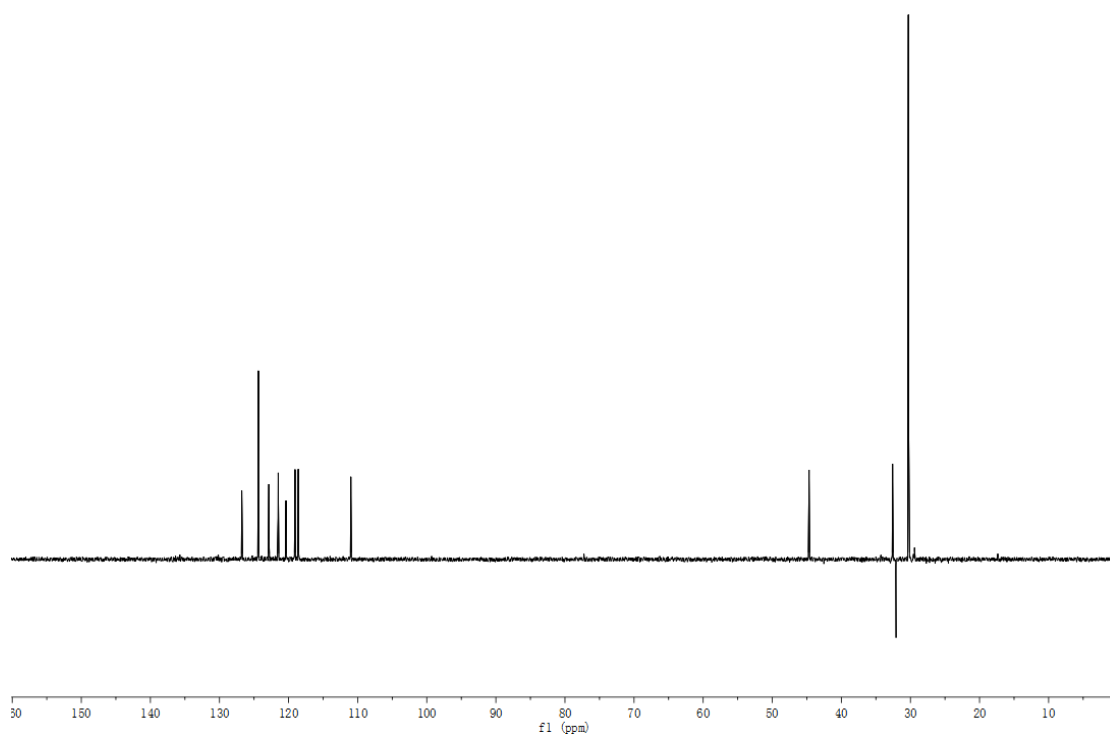

**4-(2-(1H-indol-3-yl)-1-(pyridin-3-yl)ethyl)-2,6-di-tert-butylphenol (28)**  
<sup>1</sup>H NMR (400 MHz, CDCl<sub>3</sub>):



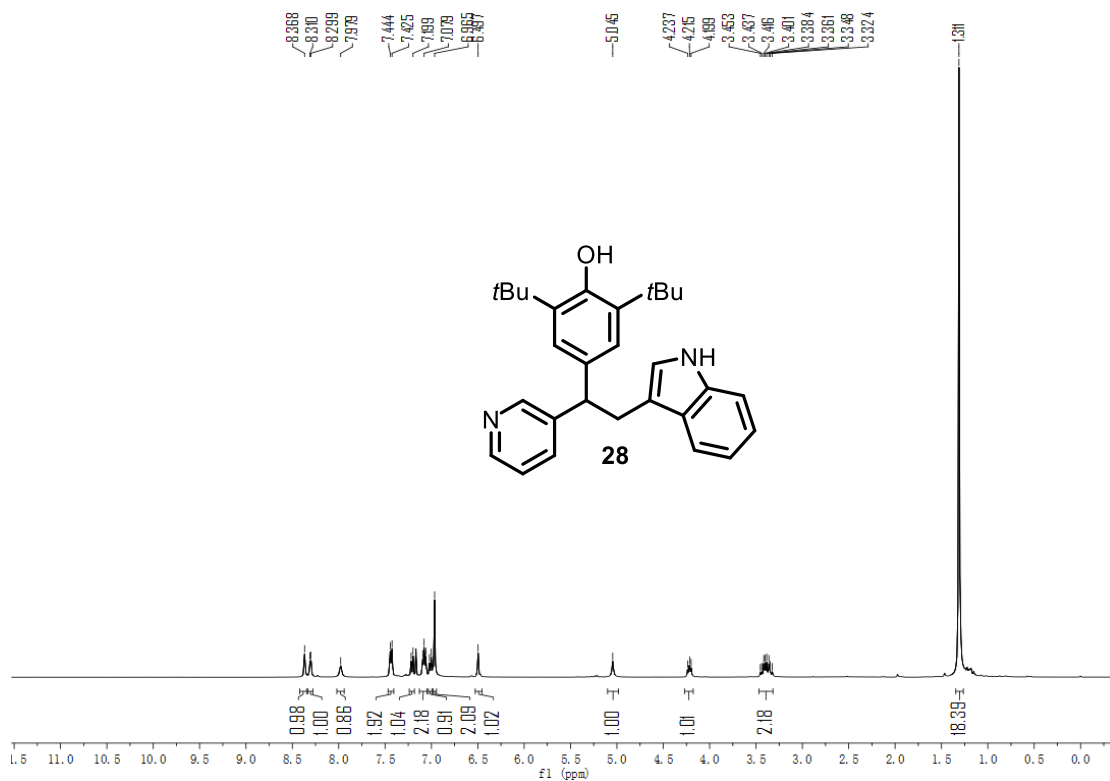

<sup>13</sup>C NMR (100 MHz, CDCl<sub>3</sub>):

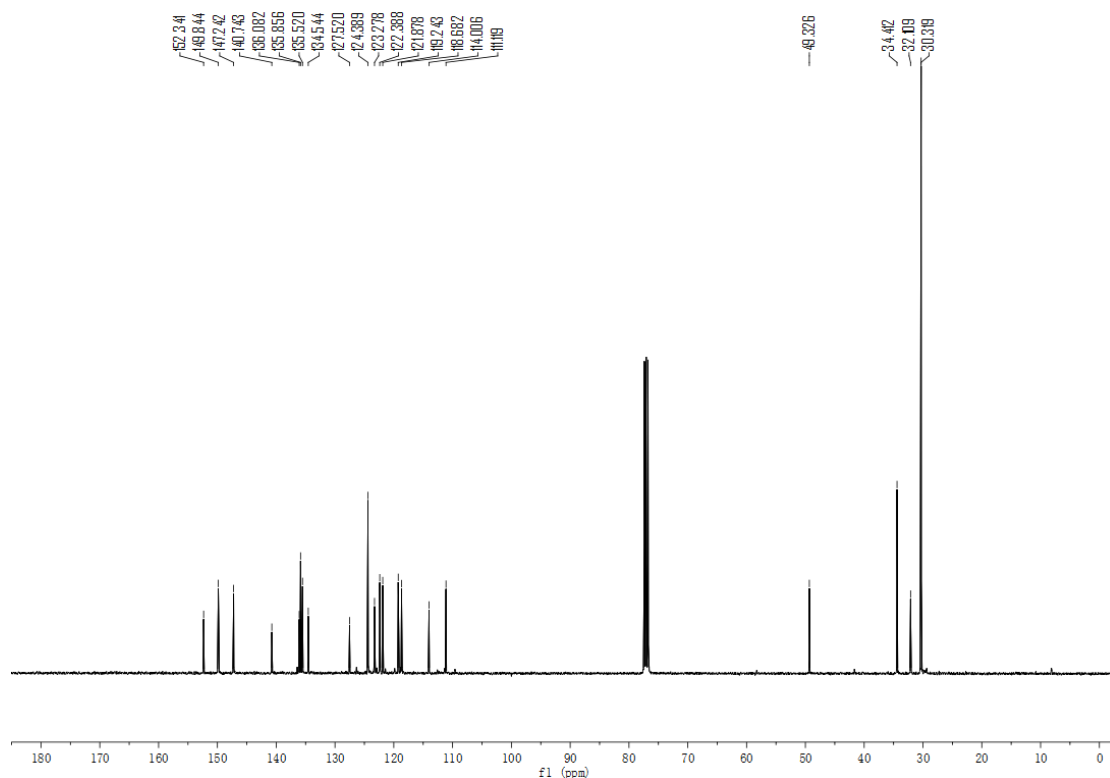

**4-(2-(1H-indol-3-yl)-1-phenylethyl)-2-(tert-butyl)-6-methylphenol (29)**

<sup>1</sup>H NMR (400 MHz, CDCl<sub>3</sub>):

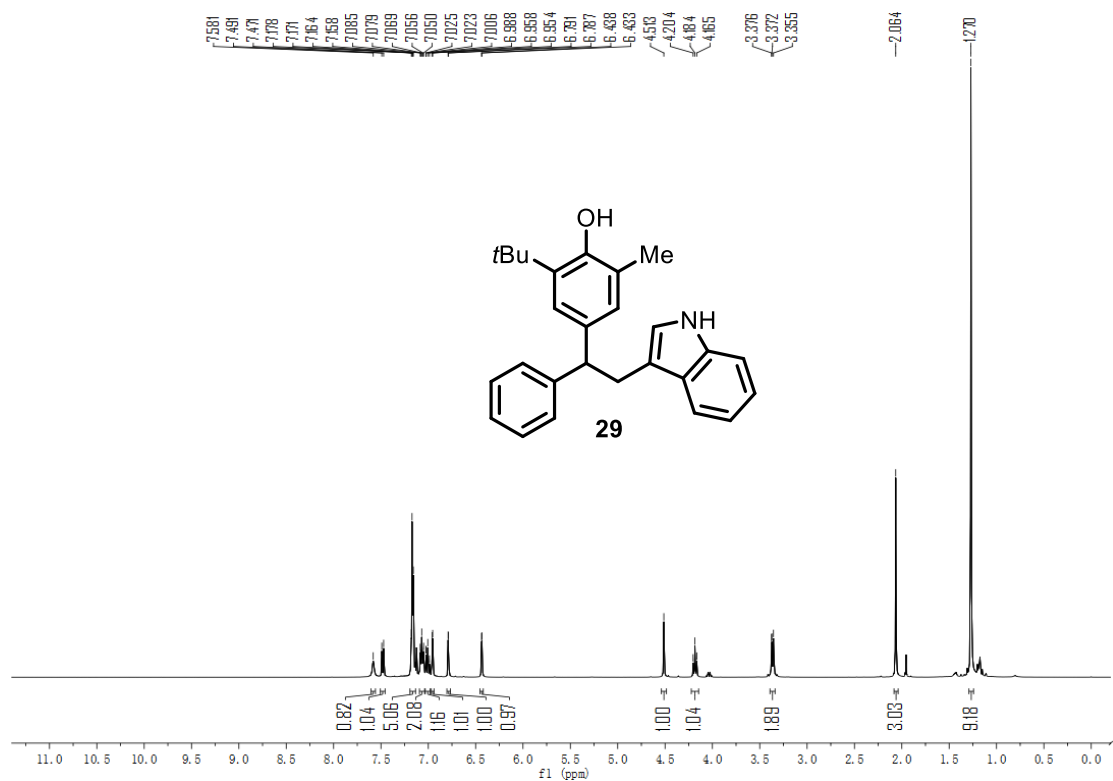

<sup>13</sup>C NMR (100 MHz, CDCl<sub>3</sub>):

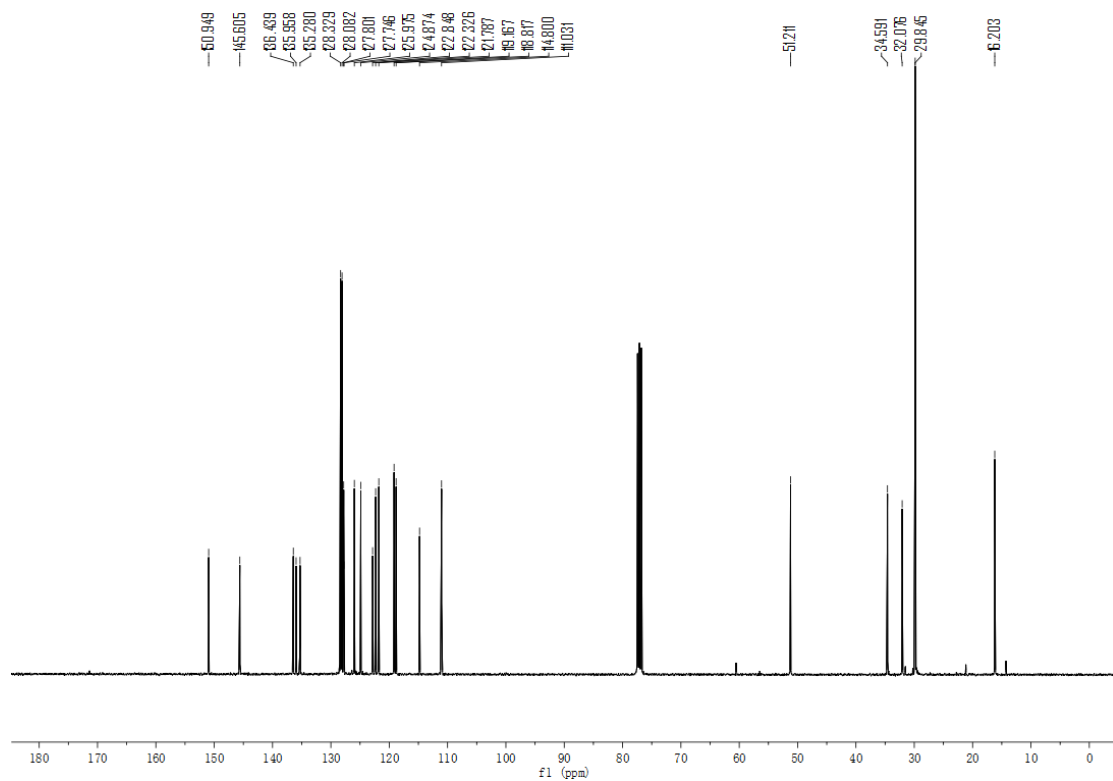

*DEPT*

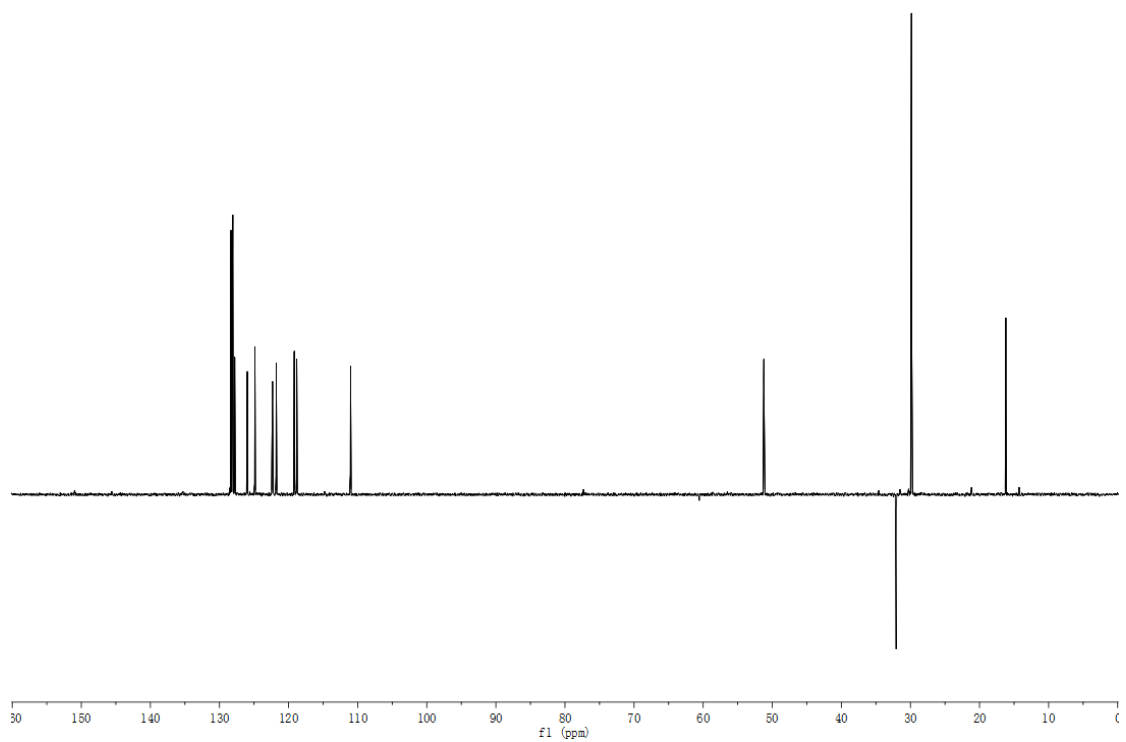

**2,6-di-tert-butyl-4-(2-(5-methyl-1H-indol-3-yl)-1-phenylethyl)phenol (30)**

<sup>1</sup>H NMR (400 MHz, CDCl<sub>3</sub>):

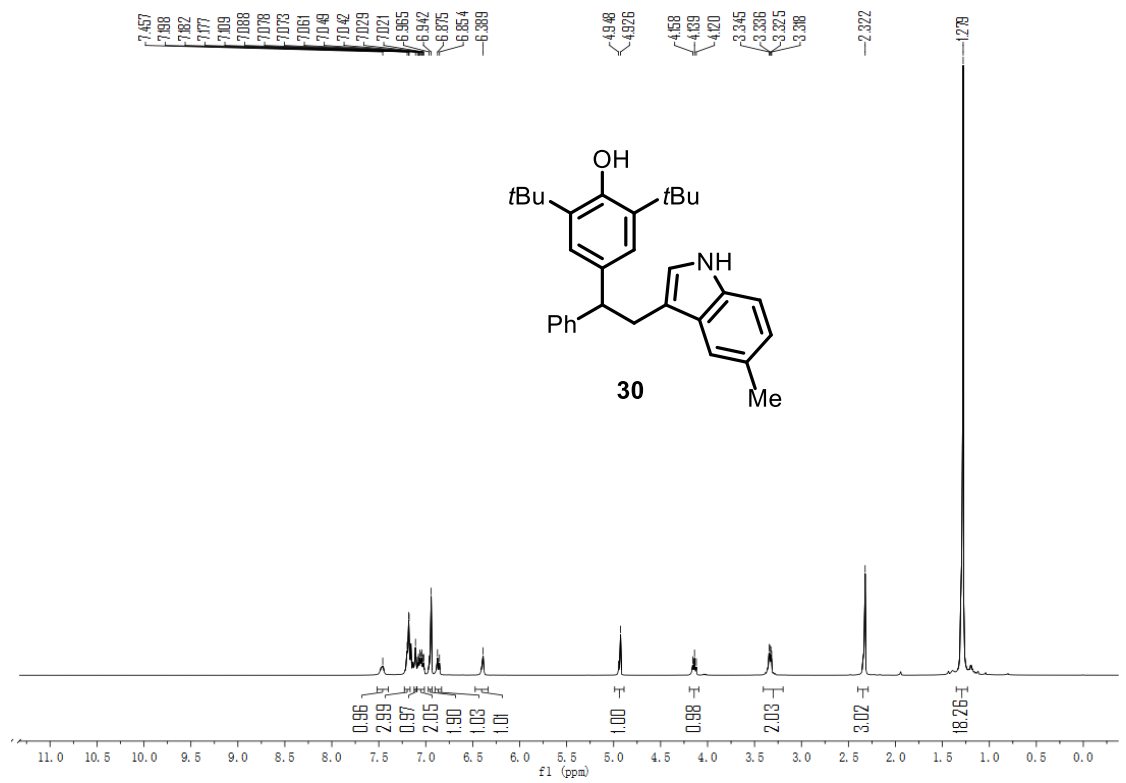

<sup>13</sup>C NMR (100 MHz, CDCl<sub>3</sub>):

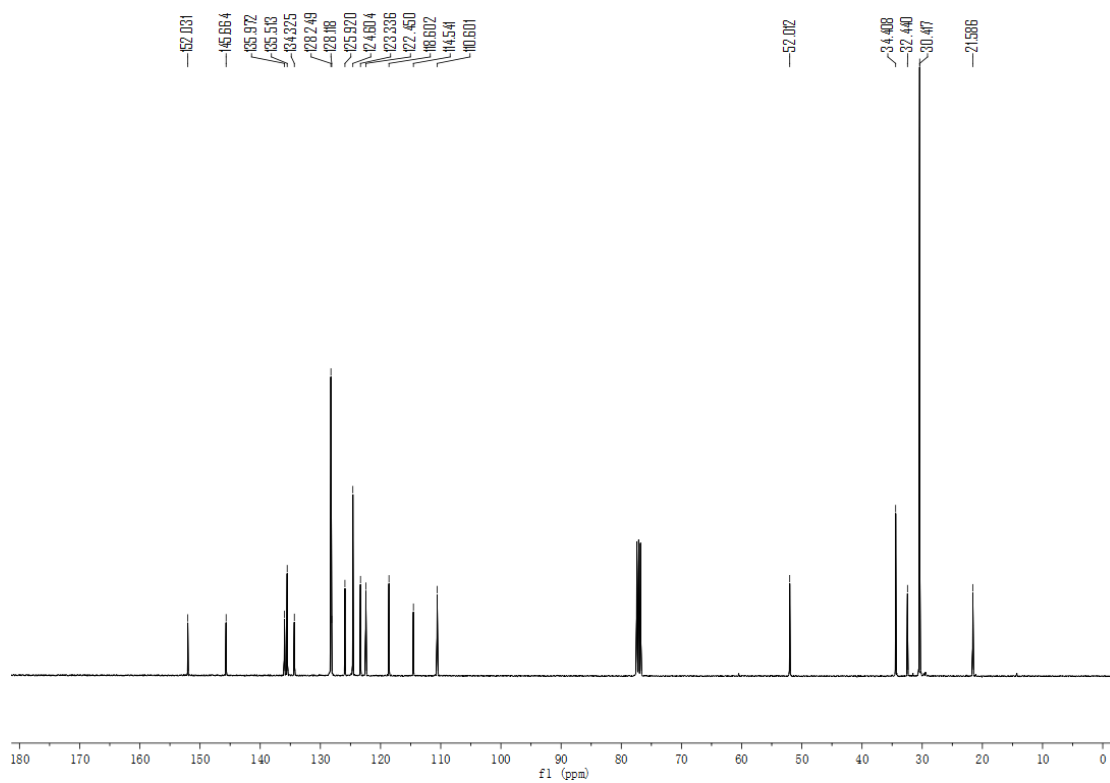

**DEPT**

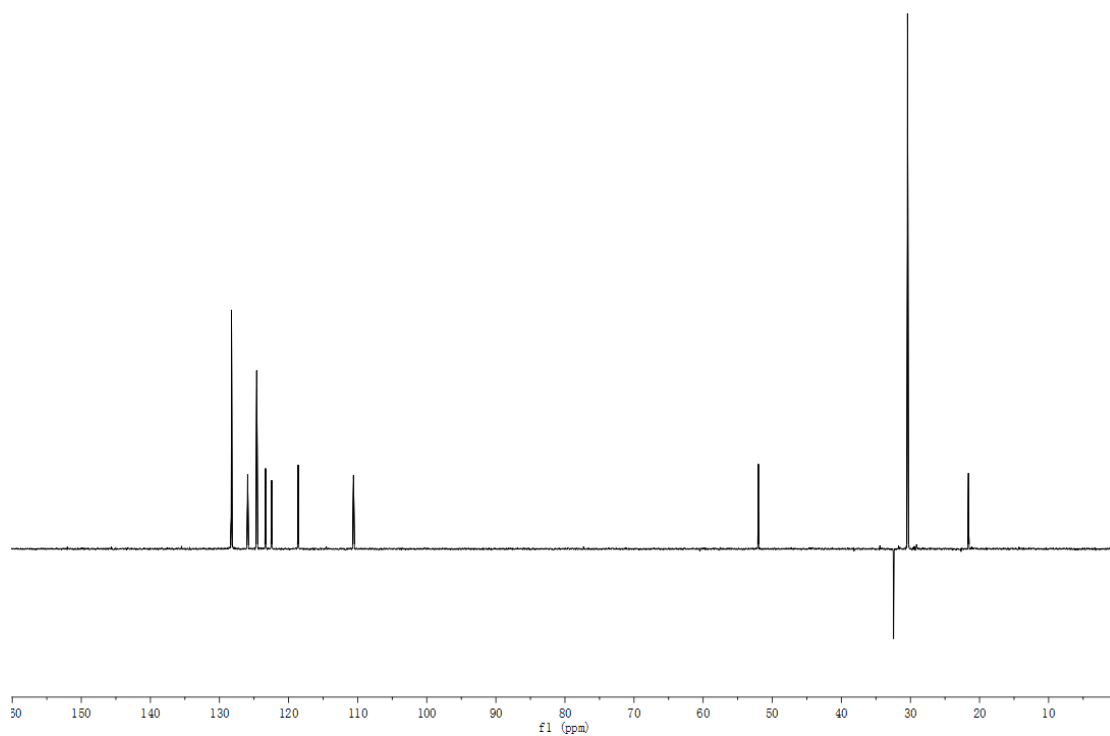

**2,6-di-tert-butyl-4-(2-(5-methoxy-1H-indol-3-yl)-1-phenylethyl)phenol (31)**  
 $^1\text{H}$  NMR (400 MHz,  $\text{CDCl}_3$ ):

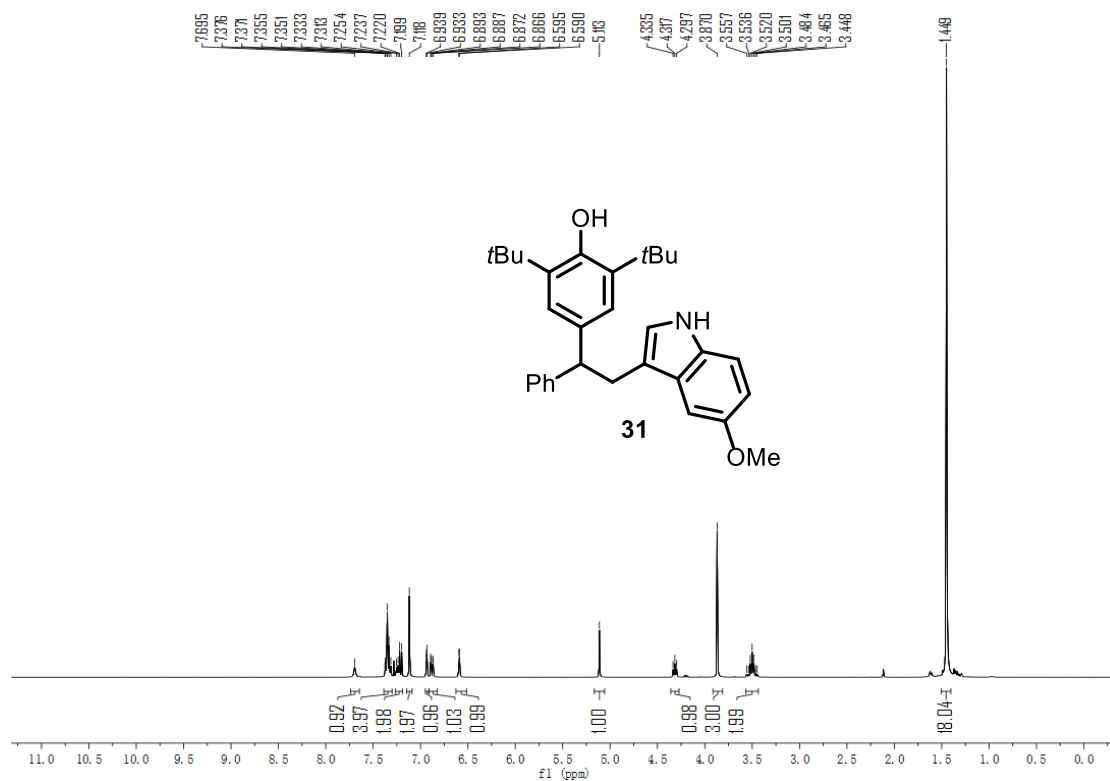

**<sup>13</sup>C NMR (100 MHz, CDCl<sub>3</sub>):**

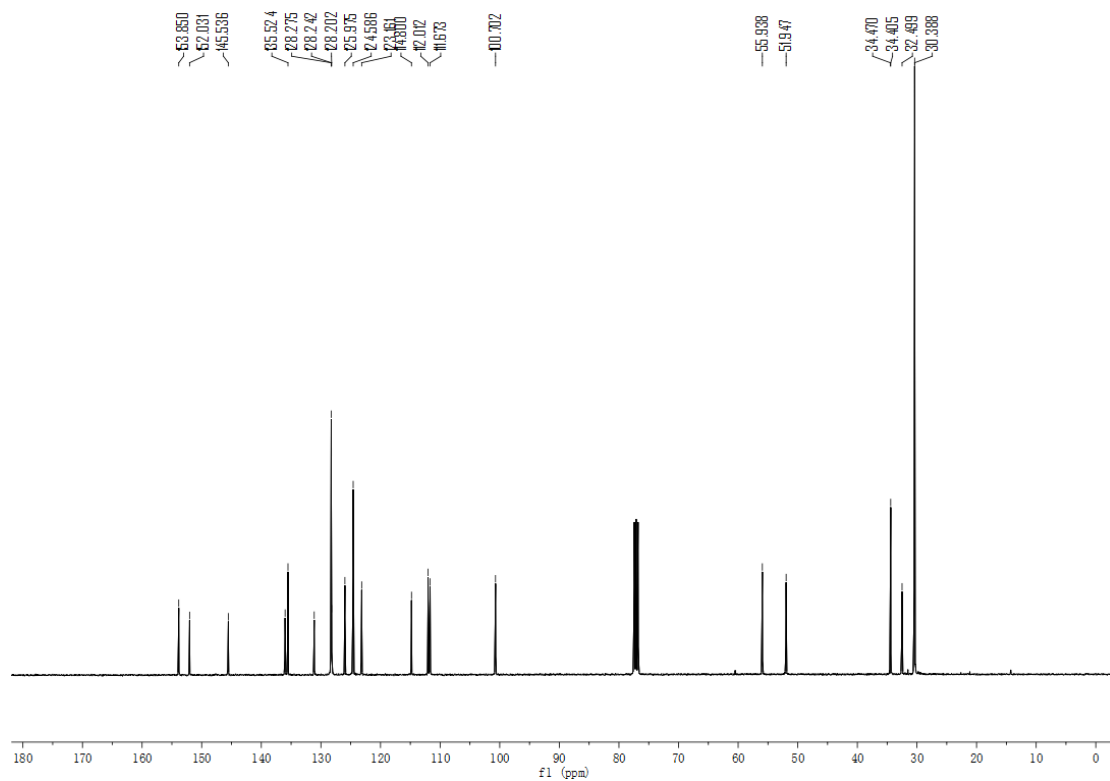

**DEPT**

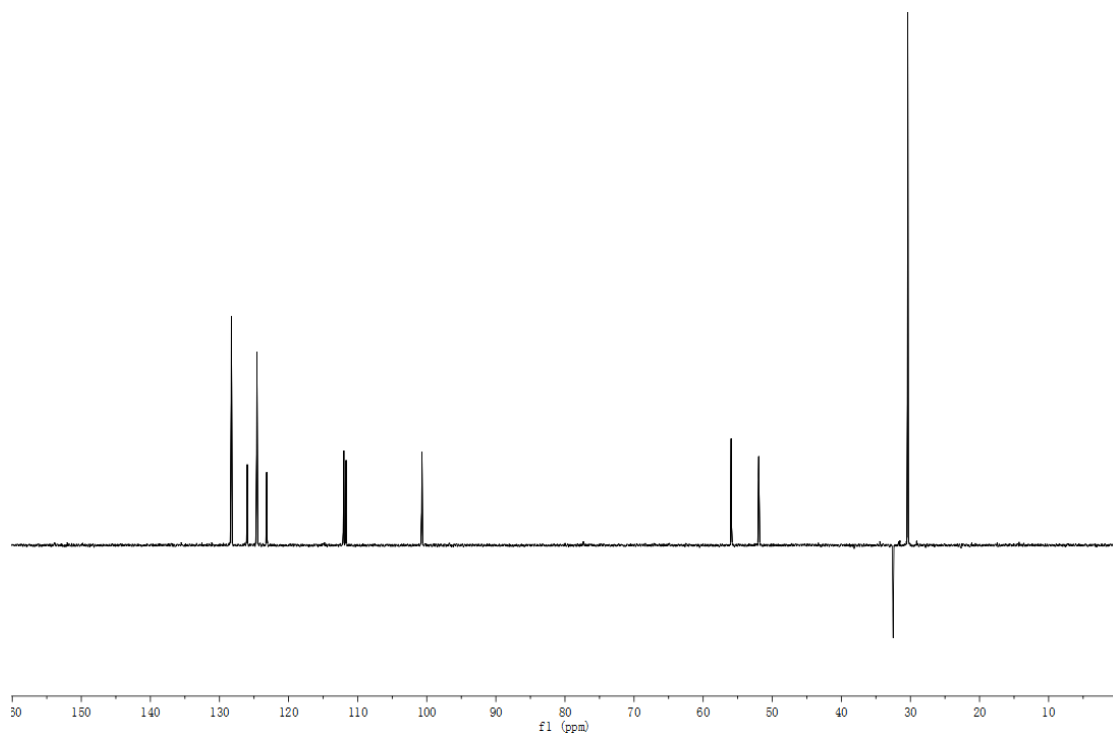

**4-(2-(5-(benzyloxy)-1H-indol-3-yl)-1-phenylethyl)-2,6-di-tert-butylphenol (32)**  
<sup>1</sup>H NMR (400 MHz, CDCl<sub>3</sub>):

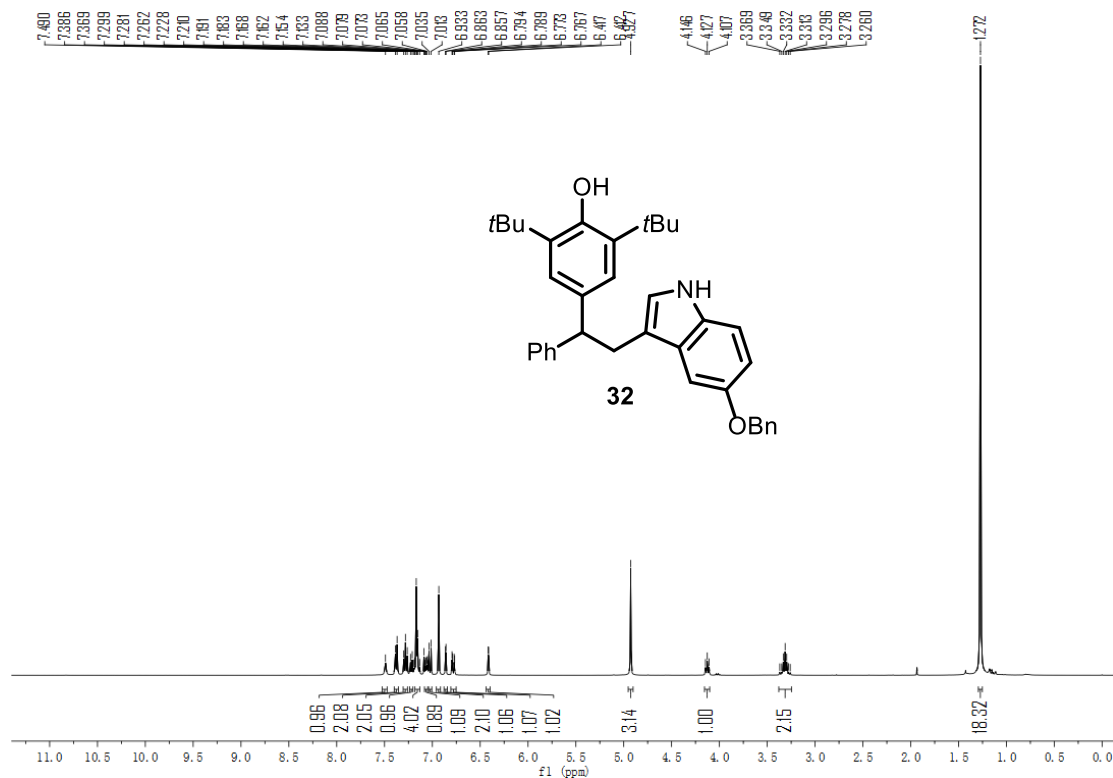

**<sup>13</sup>C NMR (100 MHz, CDCl<sub>3</sub>):**

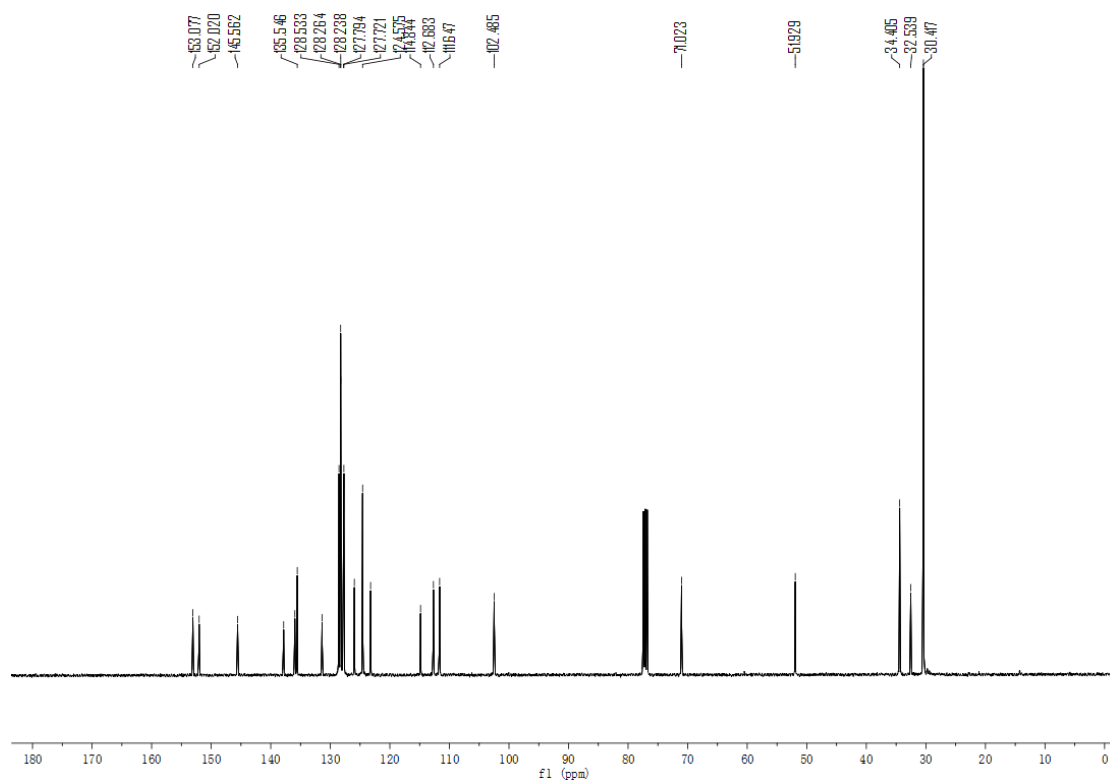

**DEPT**

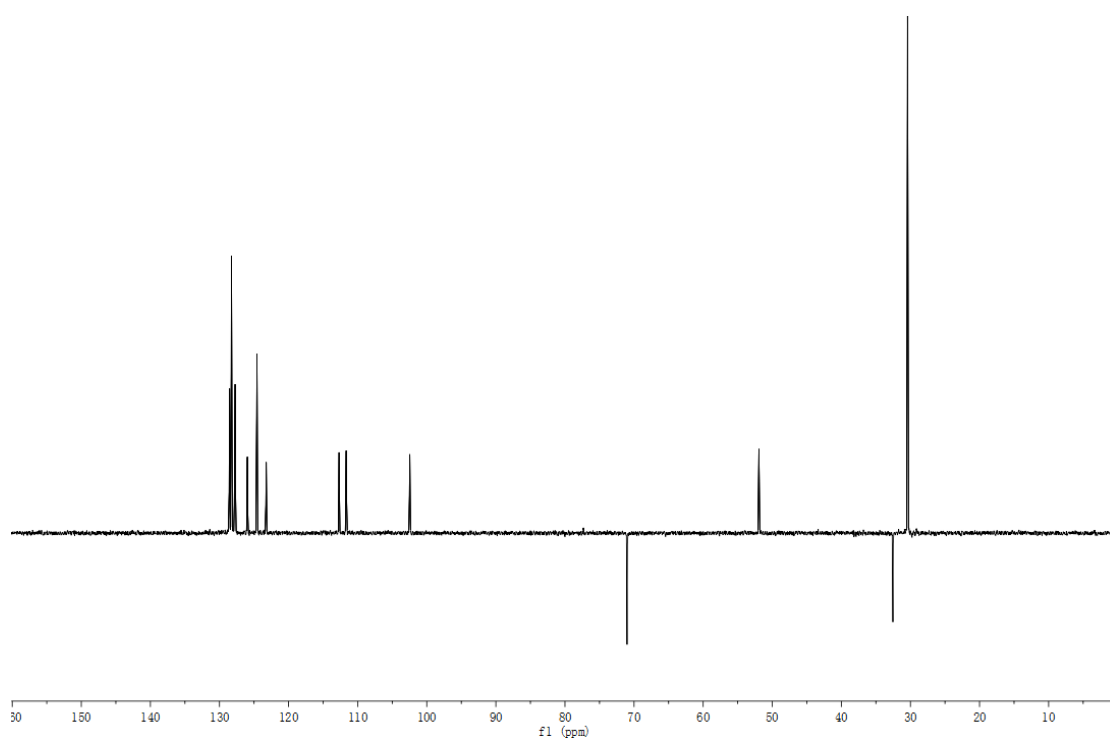

**2,6-di-tert-butyl-4-(2-(5-fluoro-1H-indol-3-yl)-1-phenylethyl)phenol (33)**

**<sup>1</sup>H NMR (400 MHz, CDCl<sub>3</sub>):**

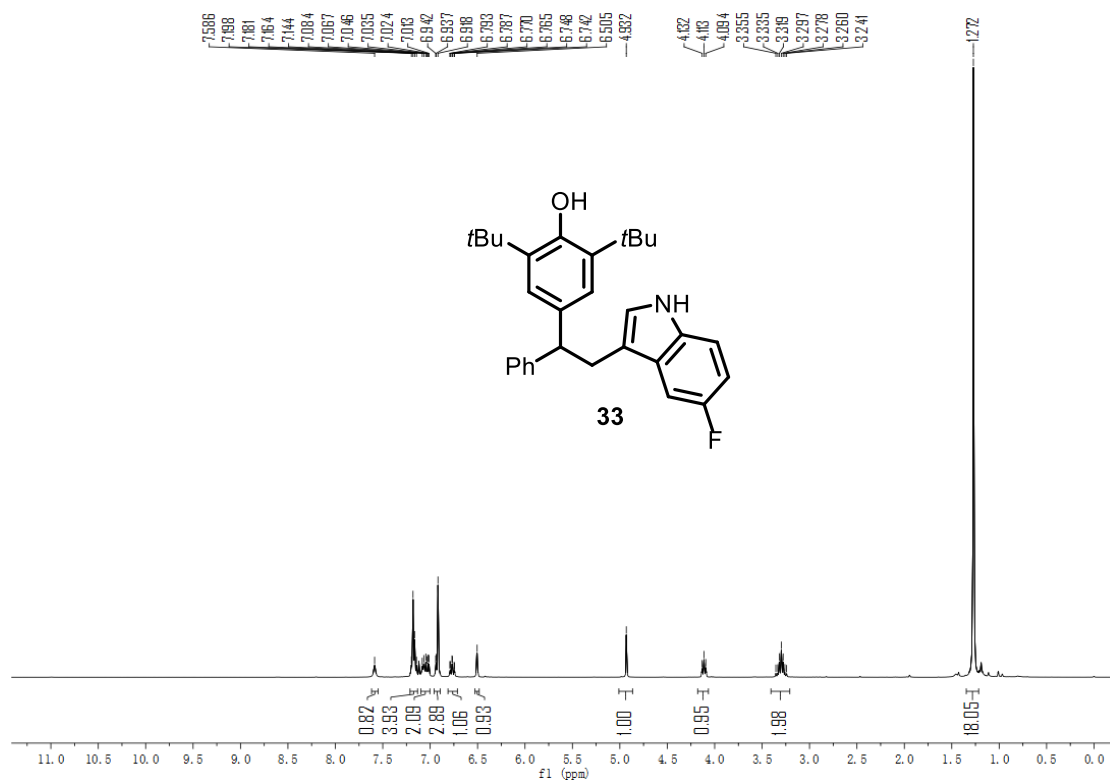

<sup>13</sup>C NMR (100 MHz, CDCl<sub>3</sub>):

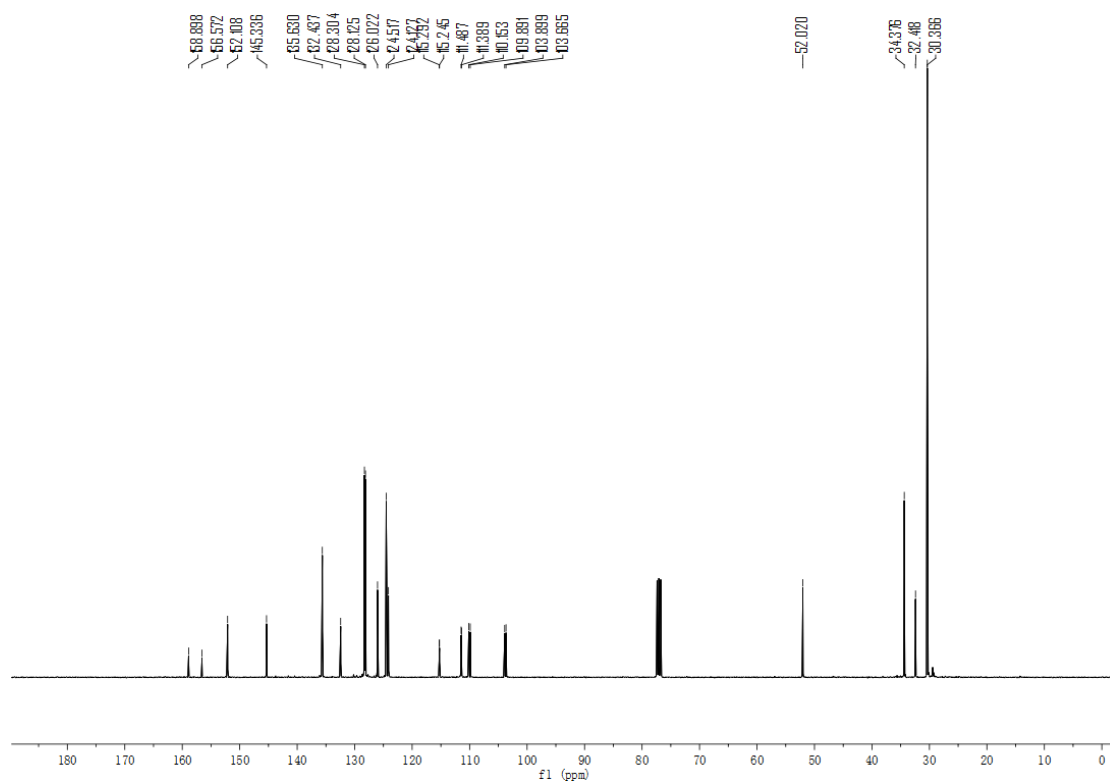

<sup>19</sup>F NMR (376 MHz, CDCl<sub>3</sub>):



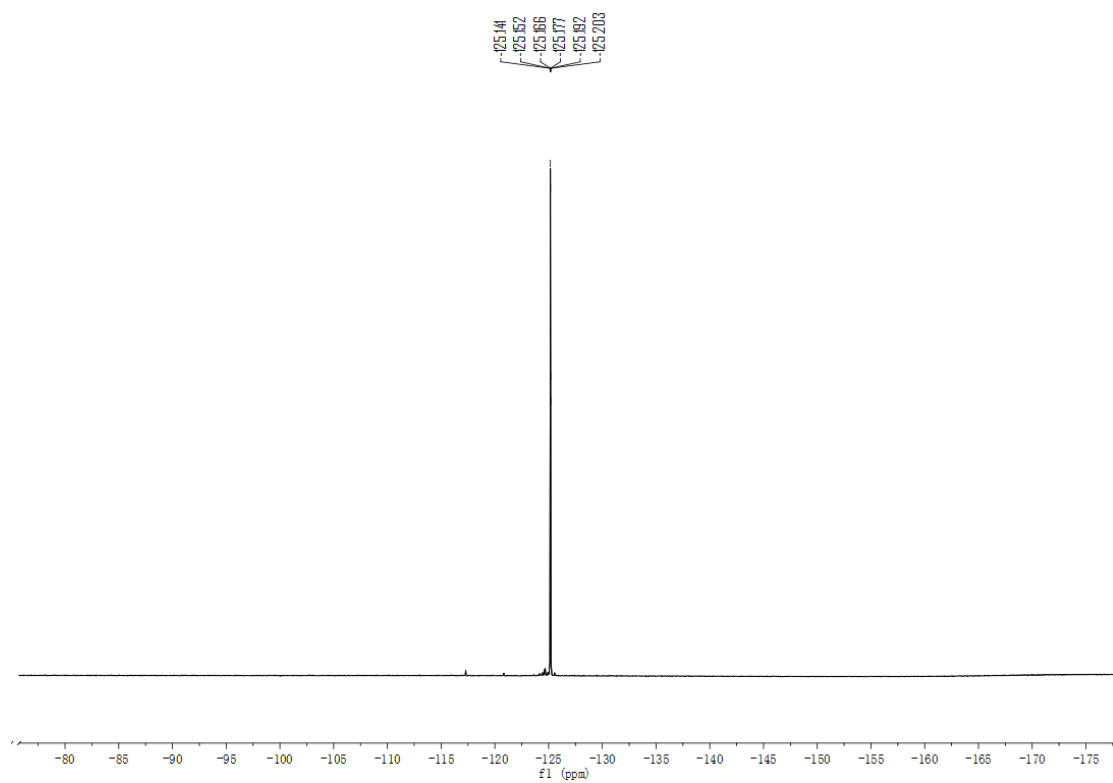

**DEPT**

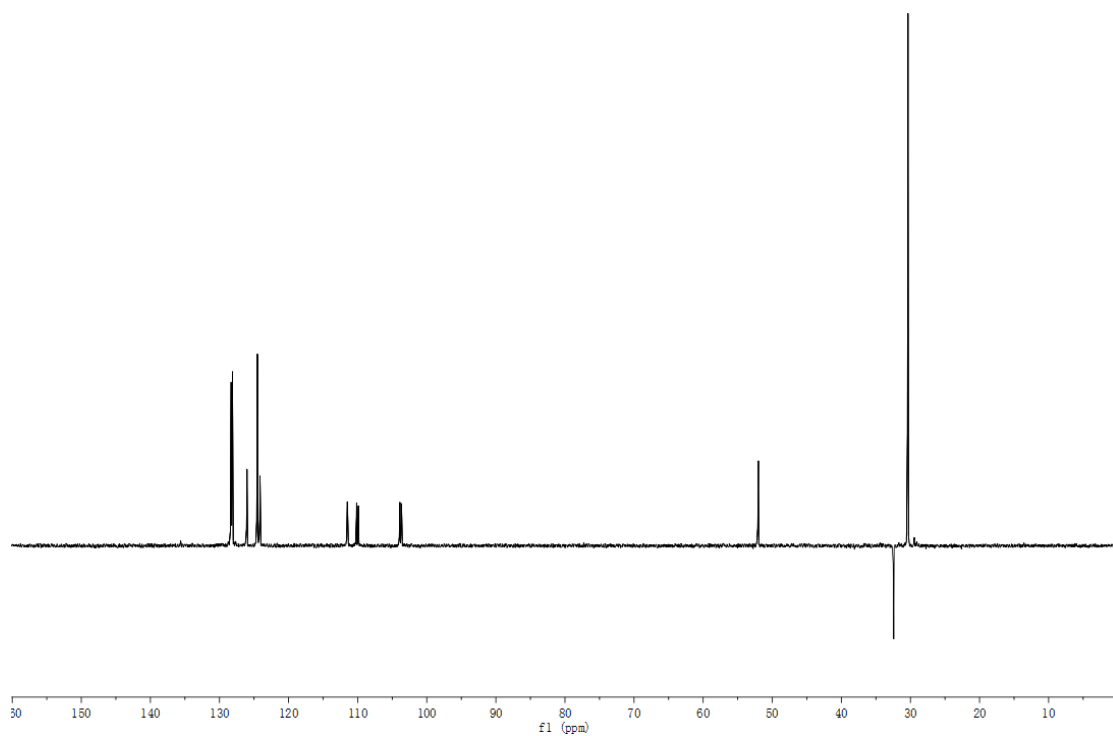

**2,6-di-tert-butyl-4-(2-(5-chloro-1H-indol-3-yl)-1-phenylethyl)phenol (34)**  
**<sup>1</sup>H NMR (400 MHz, CDCl<sub>3</sub>):**

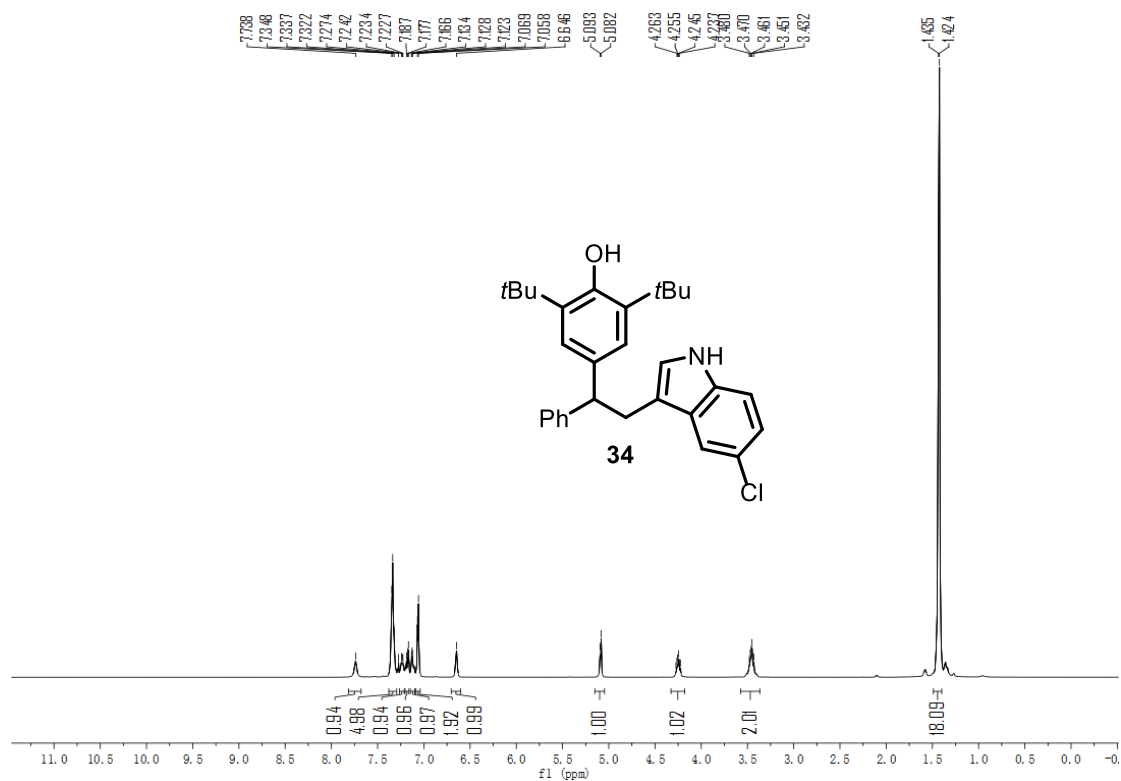

**<sup>13</sup>C NMR (100 MHz, CDCl<sub>3</sub>):**

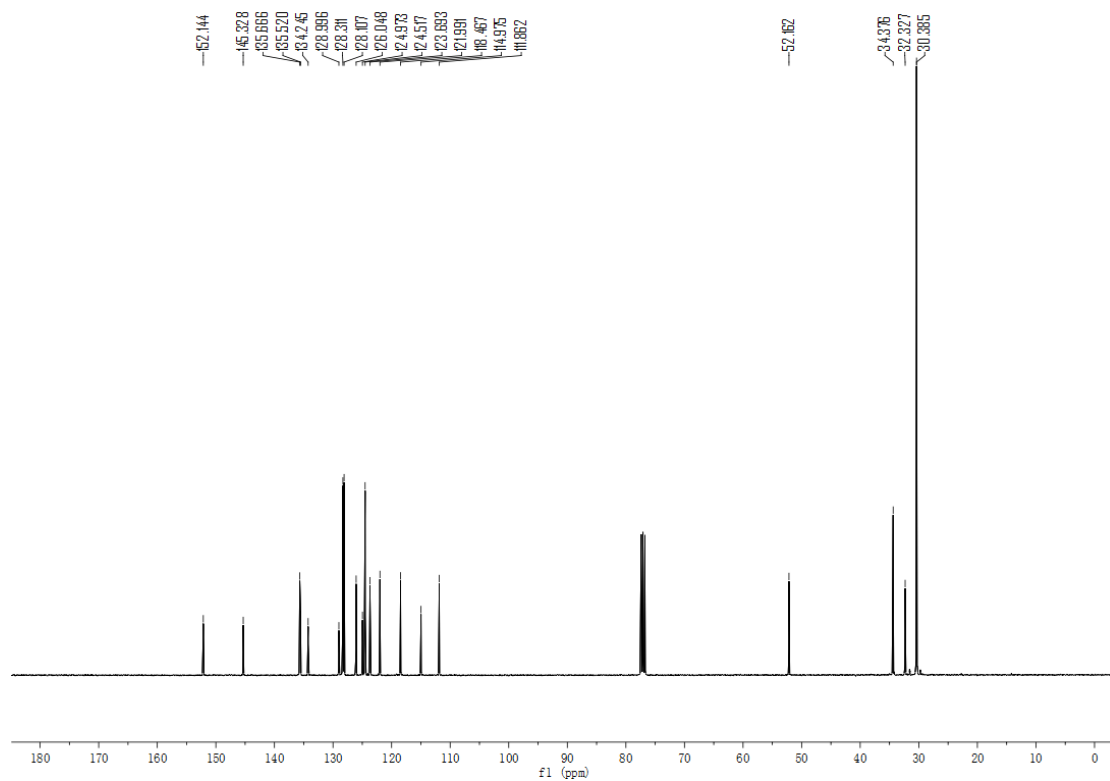

**DEPT**

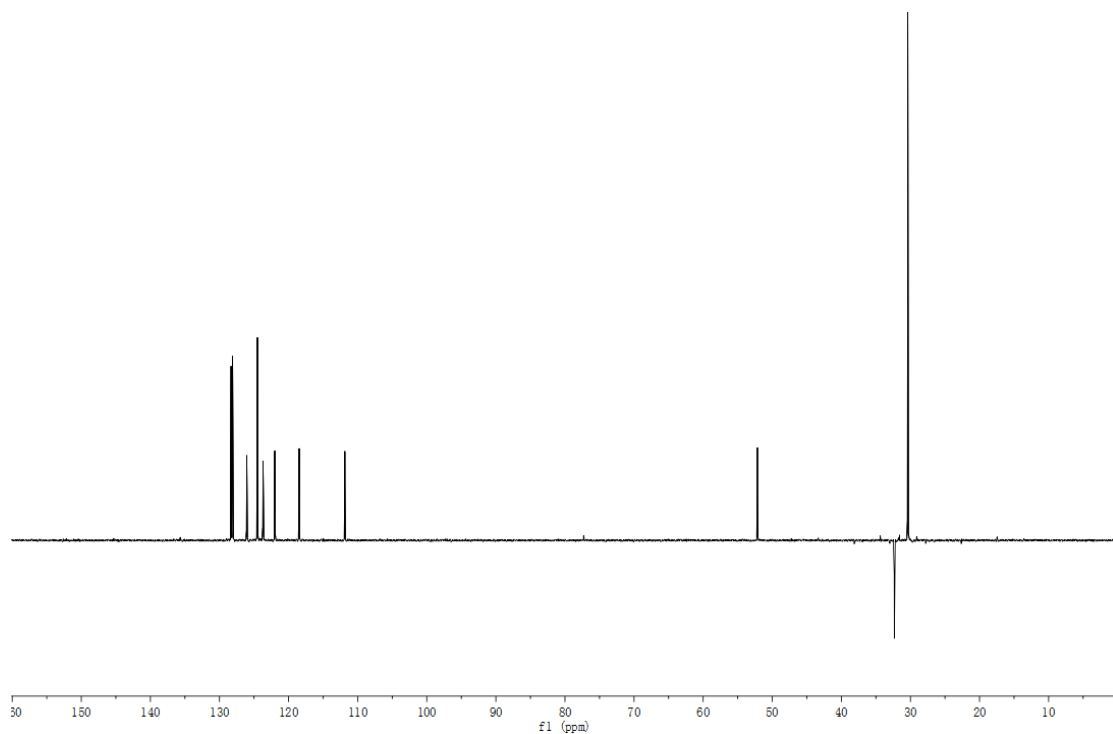

**4-(2-(5-bromo-1H-indol-3-yl)-1-phenylethyl)-2,6-di-tert-butylphenol (35)**  
<sup>1</sup>H NMR (400 MHz, CDCl<sub>3</sub>):

7.754, 7.468, 7.469, 7.342, 7.335, 7.328, 7.284, 7.270, 7.264, 7.259, 7.256, 7.249, 7.242, 7.238, 7.227, 7.153, 7.140, 7.132, 7.119, 7.064, 7.051, 6.632, 6.626, 5.083, 5.081, 4.265, 4.245, 4.232, 4.227, 4.214, 3.472, 3.453, 3.436, 3.423, -1.633

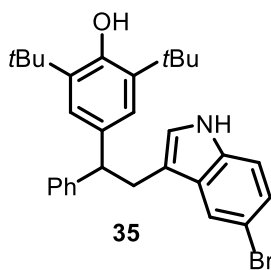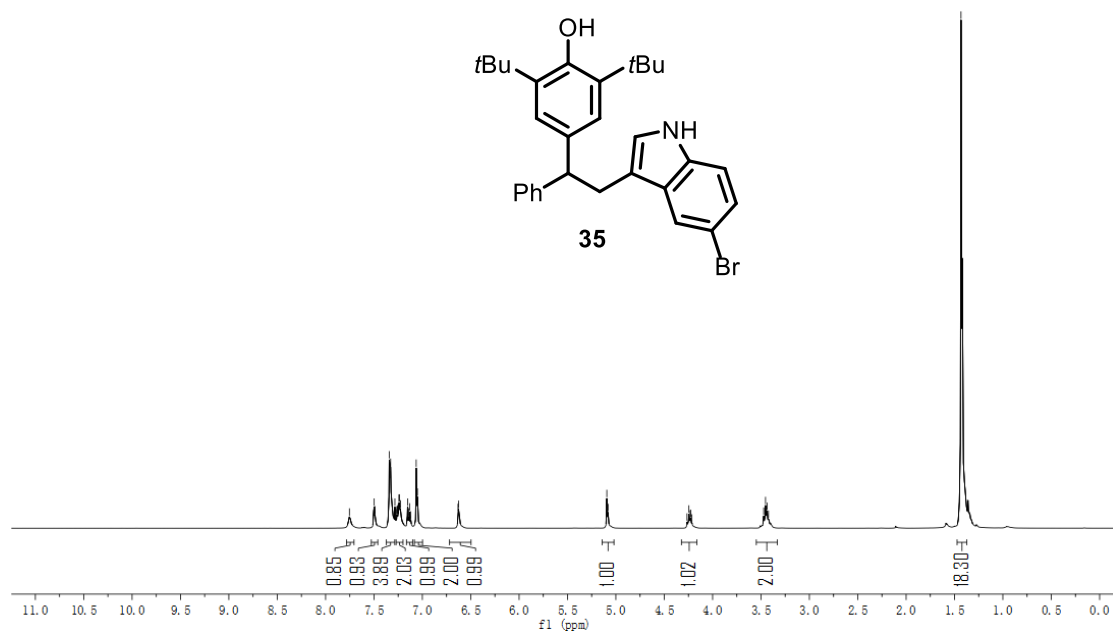

**<sup>13</sup>C NMR (100 MHz, CDCl<sub>3</sub>):**

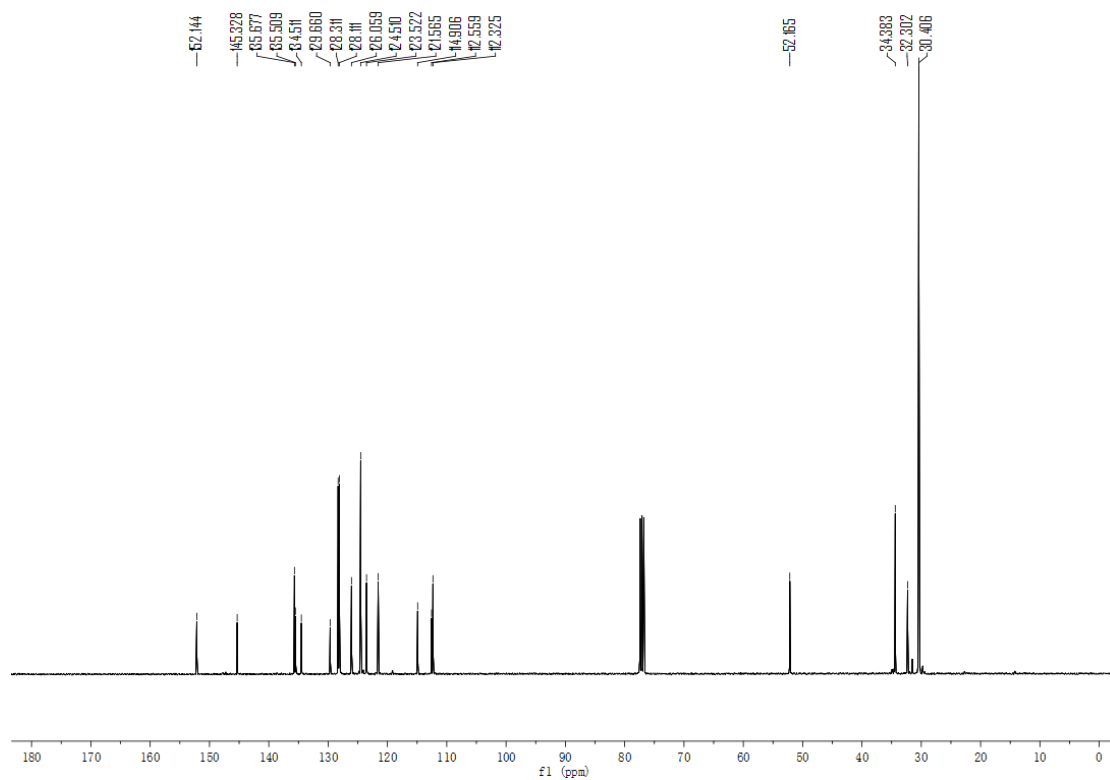

**DEPT**

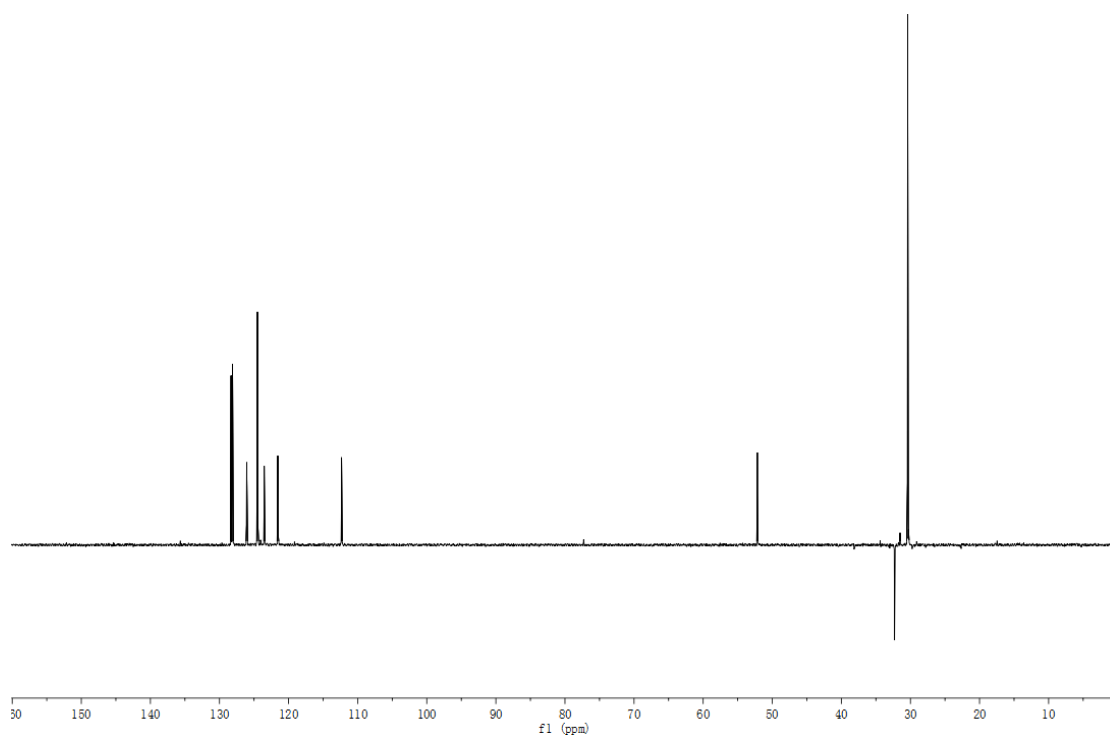

**2,6-di-tert-butyl-4-(2-(2-methyl-1H-indol-3-yl)-1-phenylethyl)phenol (36)**

**<sup>1</sup>H NMR (400 MHz, CDCl<sub>3</sub>):**

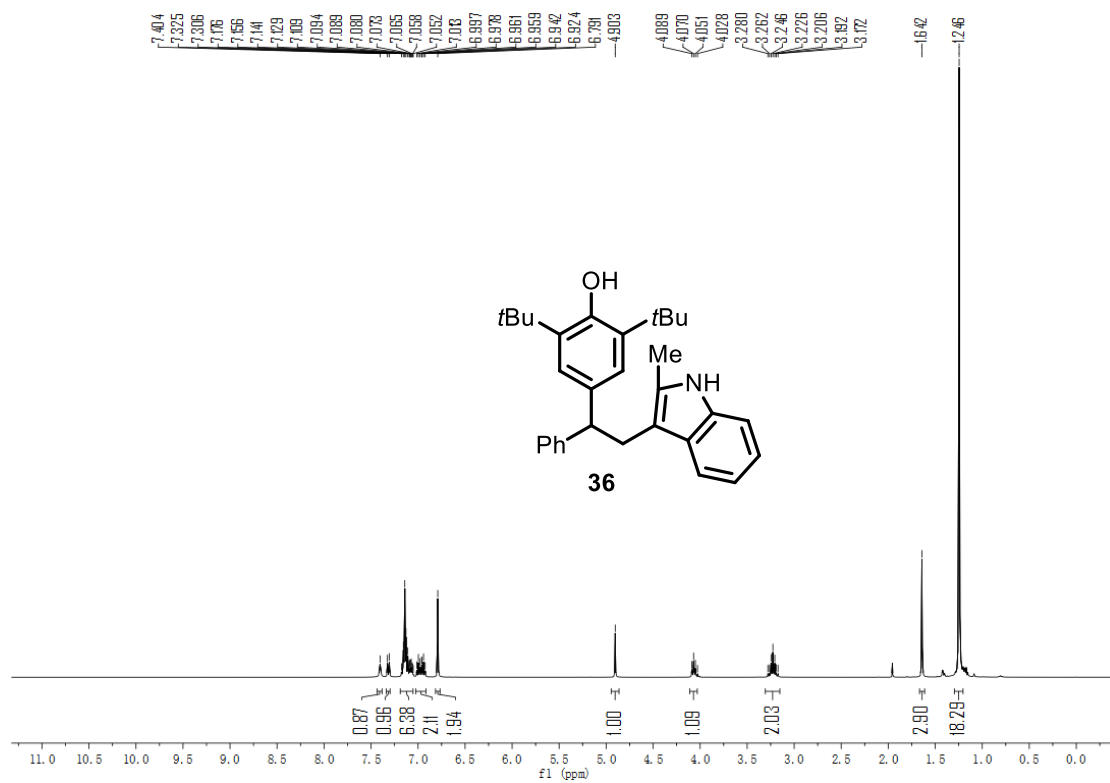

**<sup>13</sup>C NMR (100 MHz, CDCl<sub>3</sub>):**

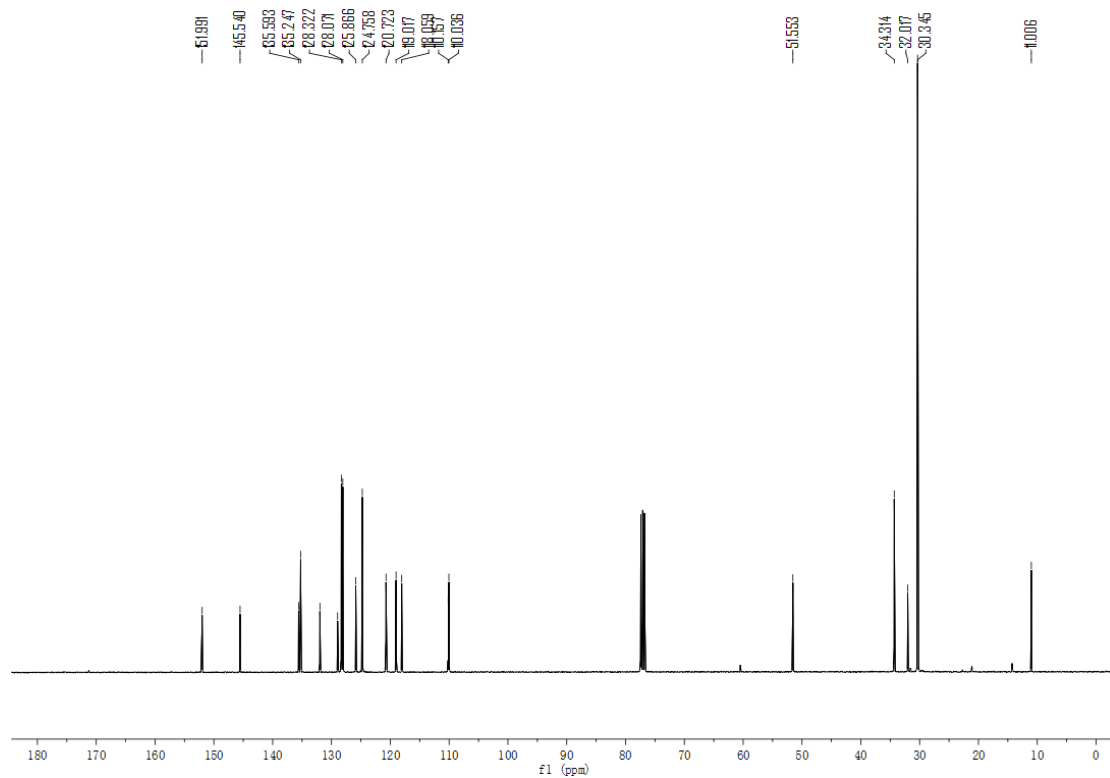

**DEPT**

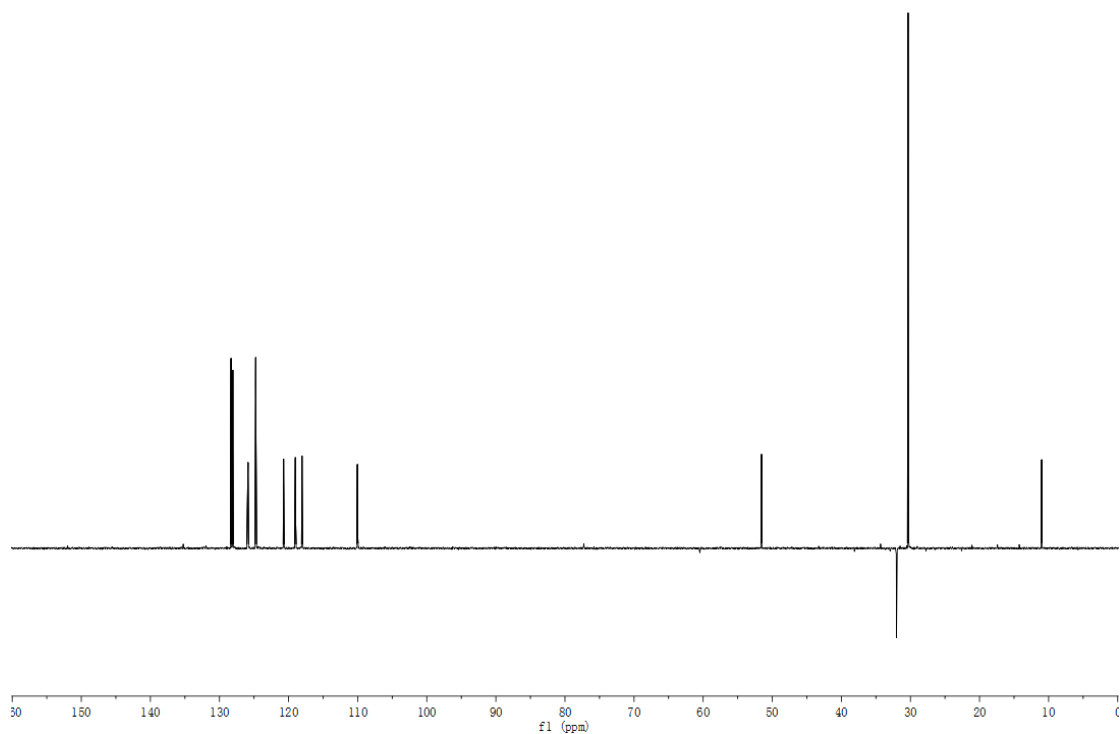

**2,6-di-tert-butyl-4-(2-(5-methoxy-2-methyl-1H-indol-3-yl)-1-phenylethyl)phenol  
(37)**

**<sup>1</sup>H NMR (400 MHz, CDCl<sub>3</sub>):**

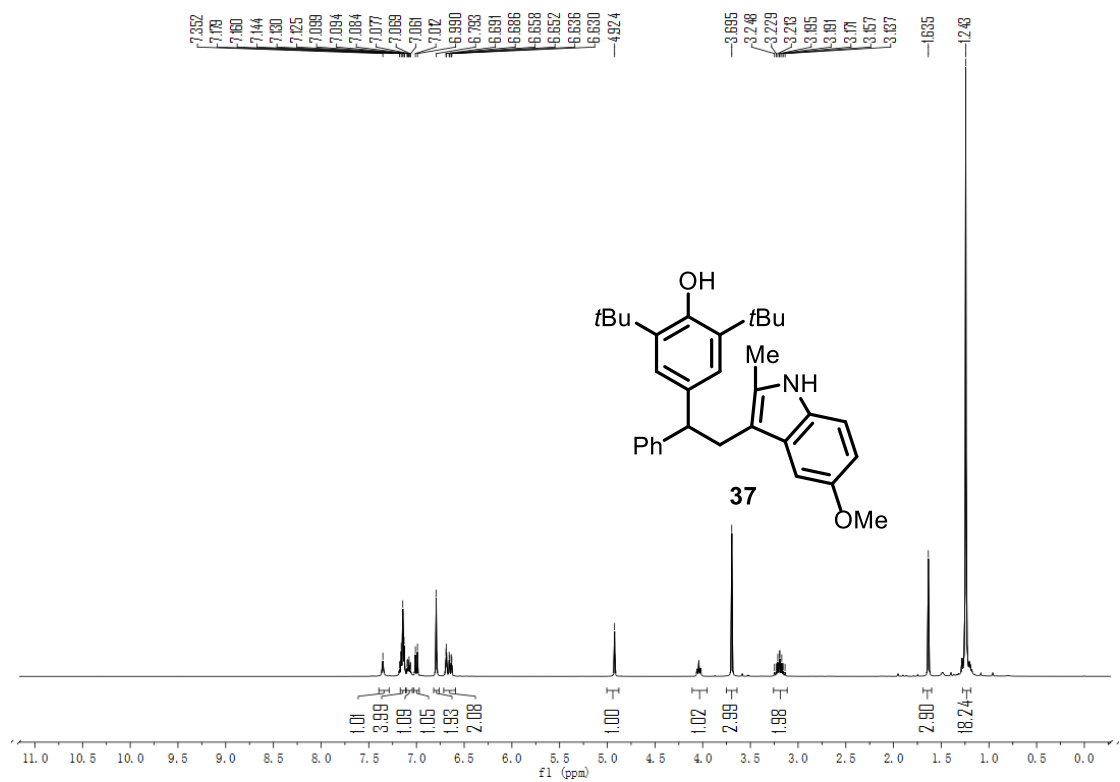

**<sup>13</sup>C NMR (100 MHz, CDCl<sub>3</sub>):**

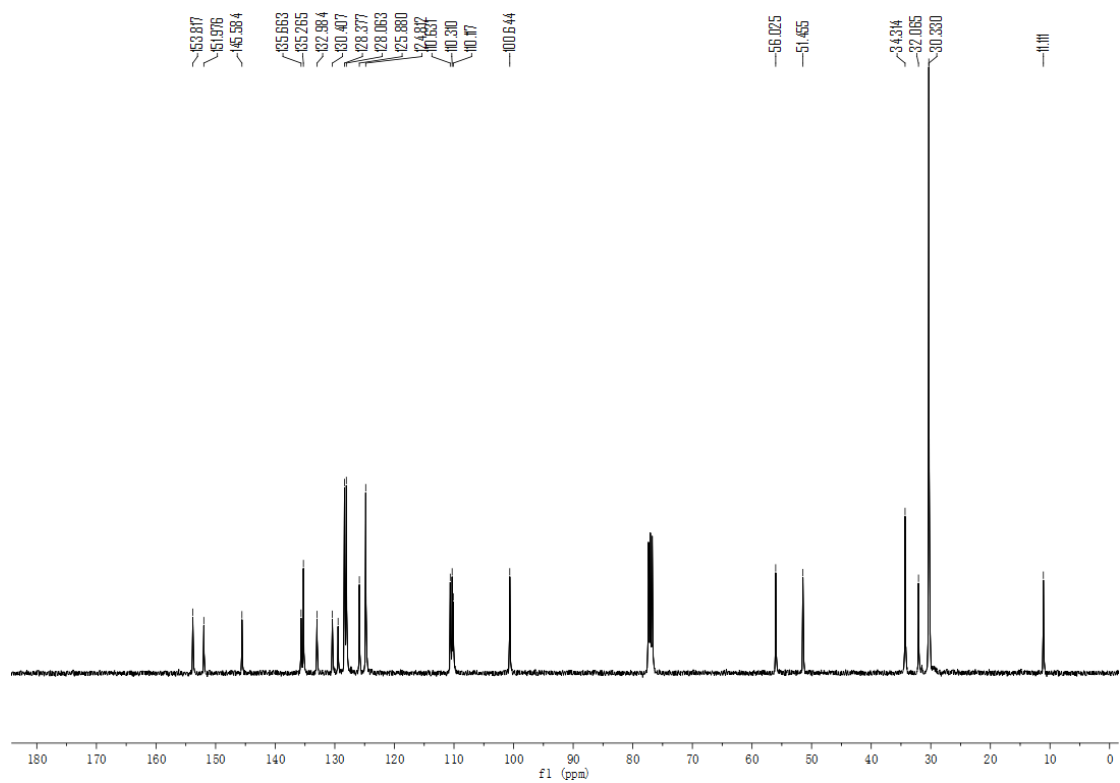

**DEPT**

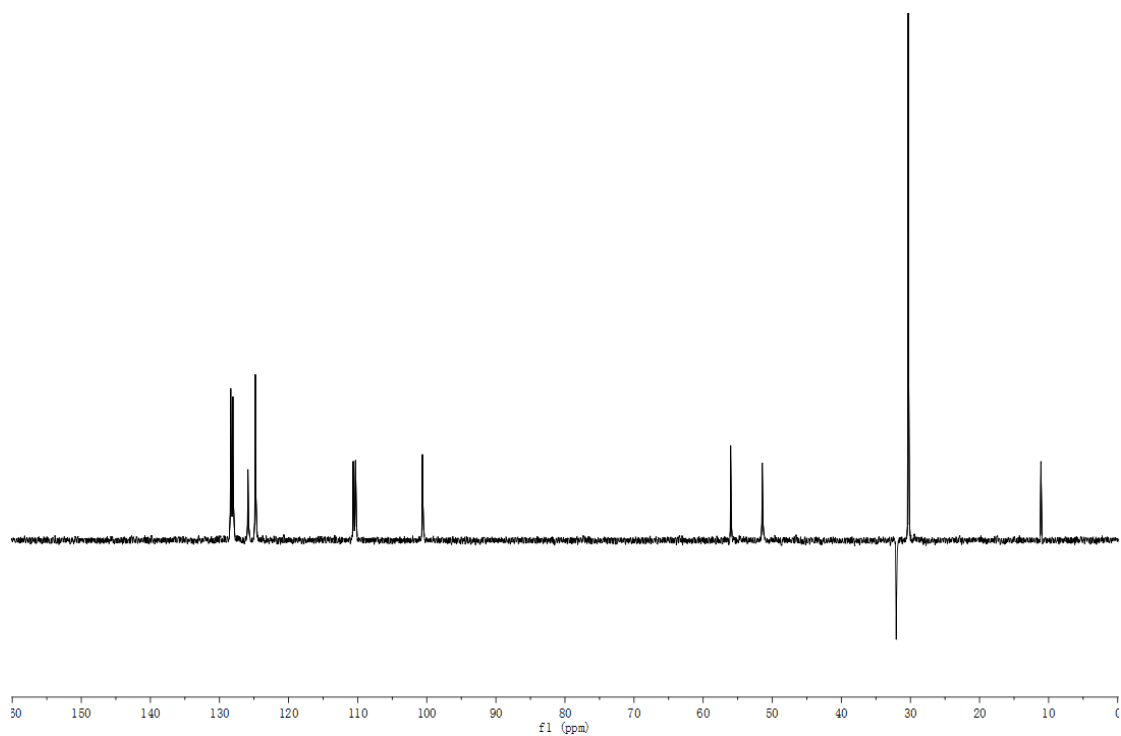

**2,6-di-tert-butyl-4-(2-(6-methoxy-1H-indol-3-yl)-1-phenylethyl)phenol (38)**  
<sup>1</sup>H NMR (400 MHz, CDCl<sub>3</sub>):

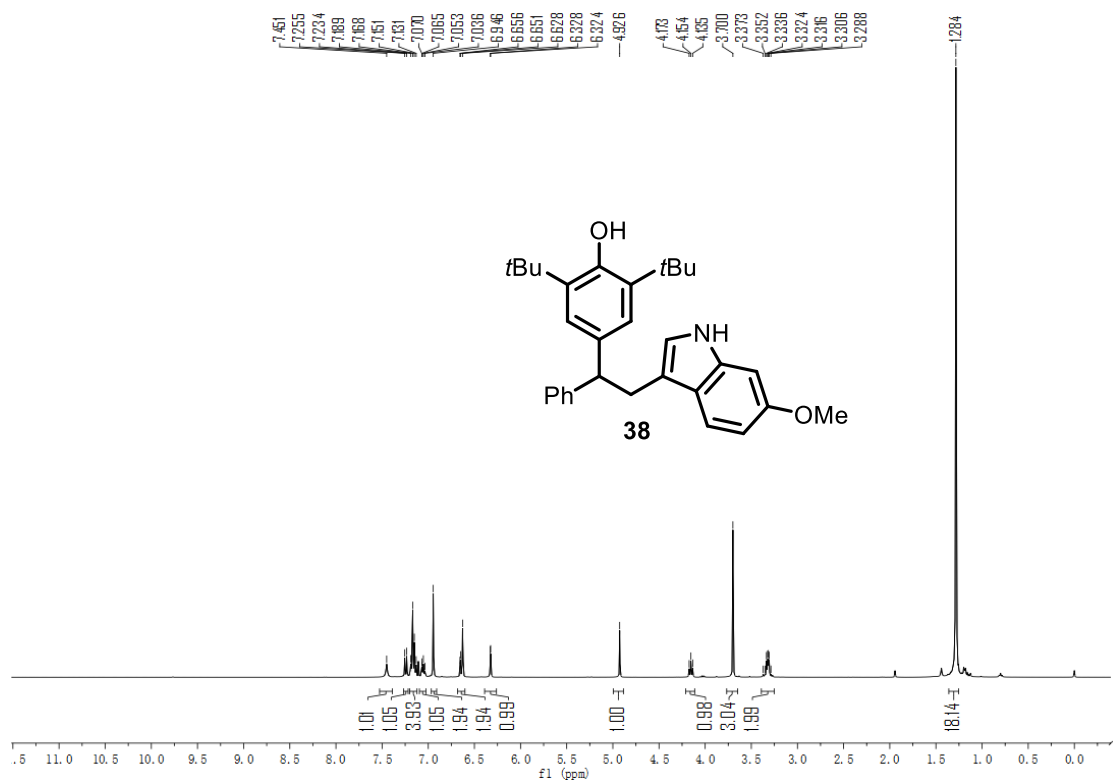

**<sup>13</sup>C NMR (100 MHz, CDCl<sub>3</sub>):**

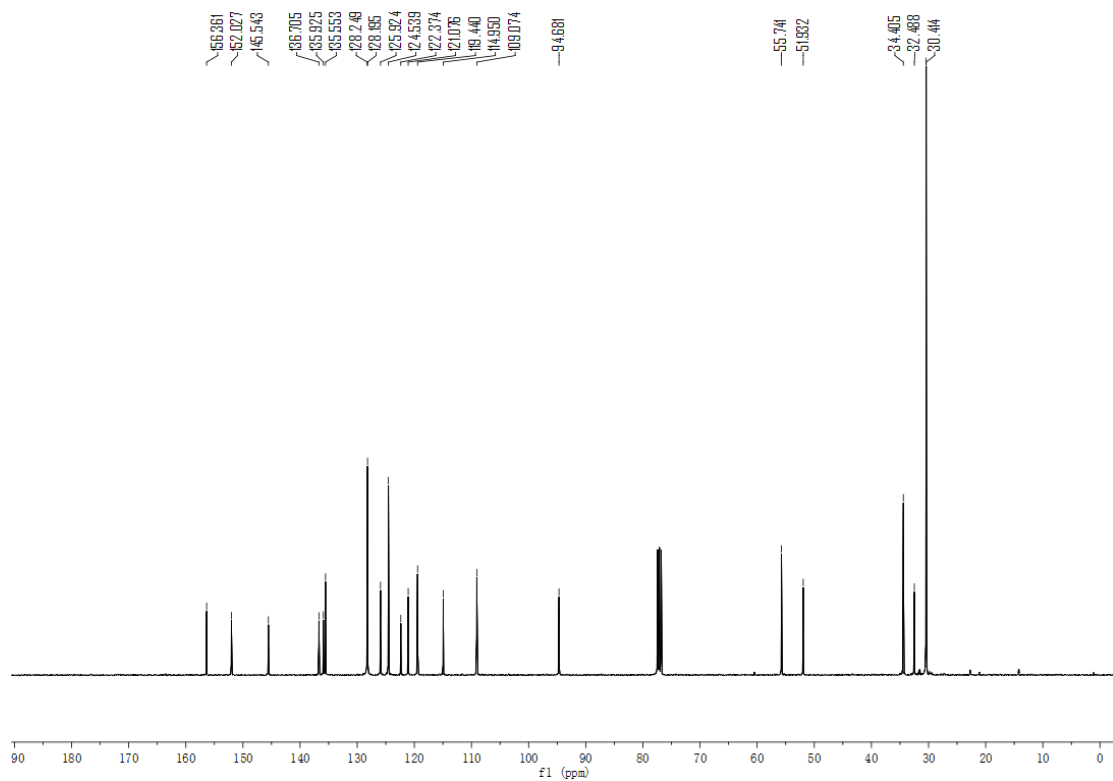

**DEPT**



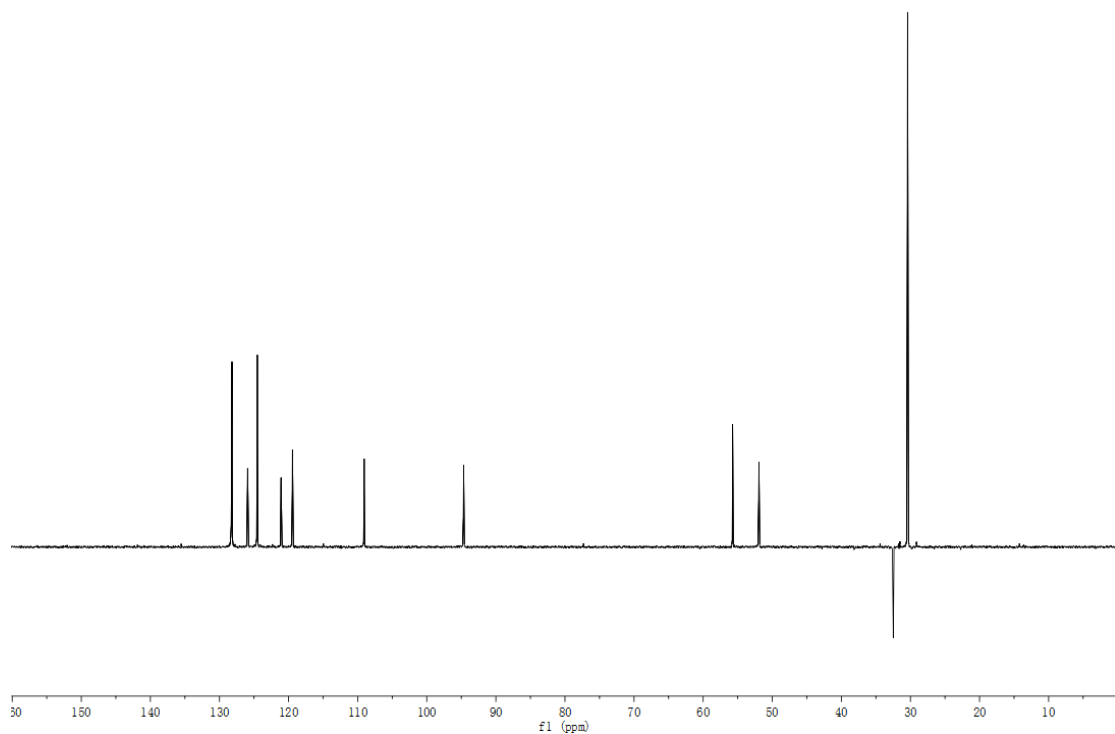

**2,6-di-tert-butyl-4-(2-(6-fluoro-1H-indol-3-yl)-1-phenylethyl)phenol (39)**

**<sup>1</sup>H NMR (400 MHz, CDCl<sub>3</sub>):**

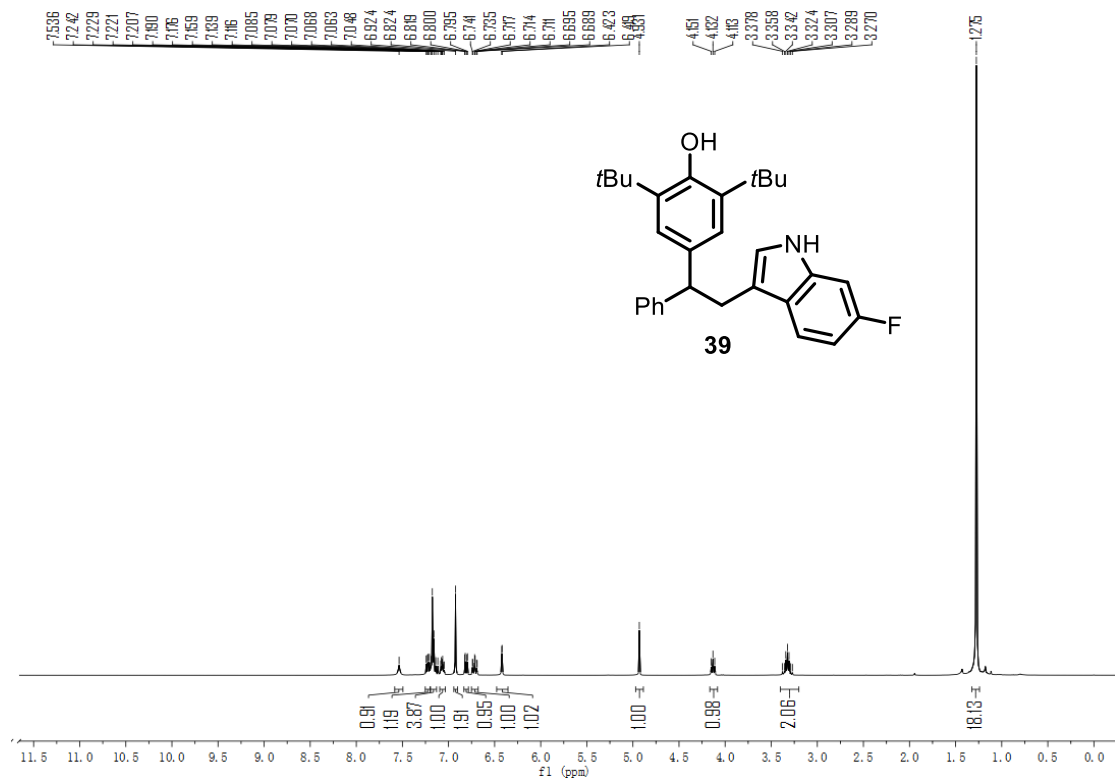

**<sup>13</sup>C NMR (100 MHz, CDCl<sub>3</sub>):**

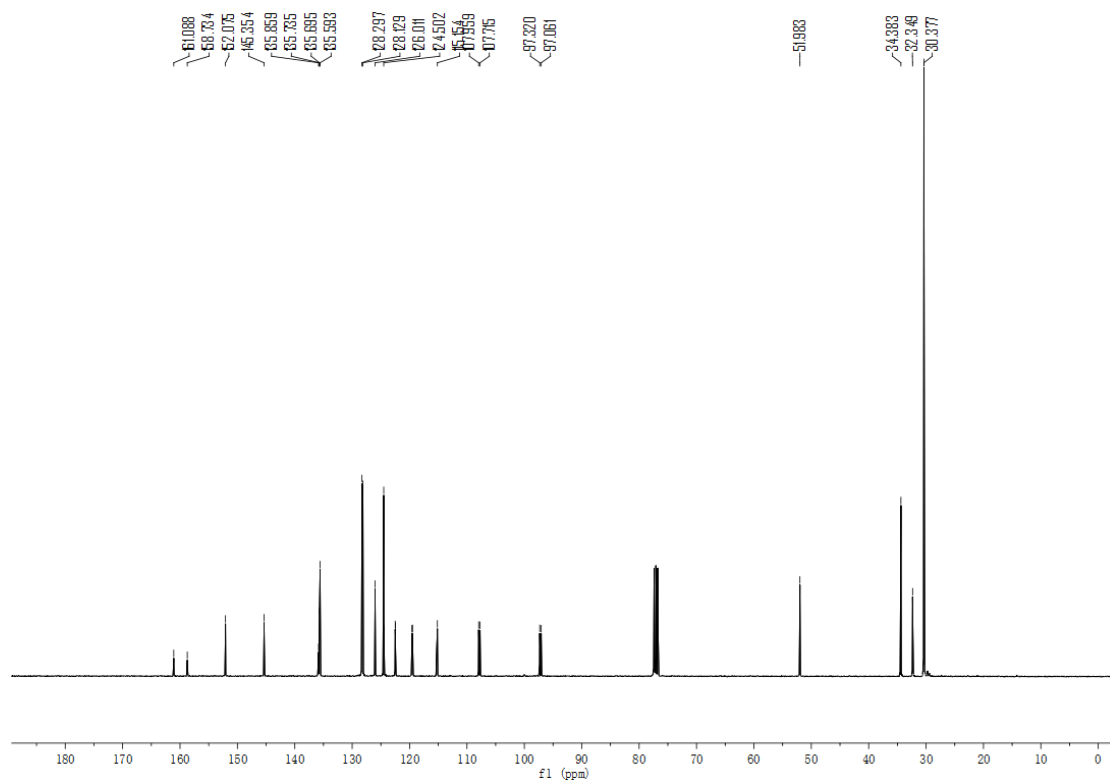

**<sup>19</sup>F NMR (376 MHz, CDCl<sub>3</sub>):**

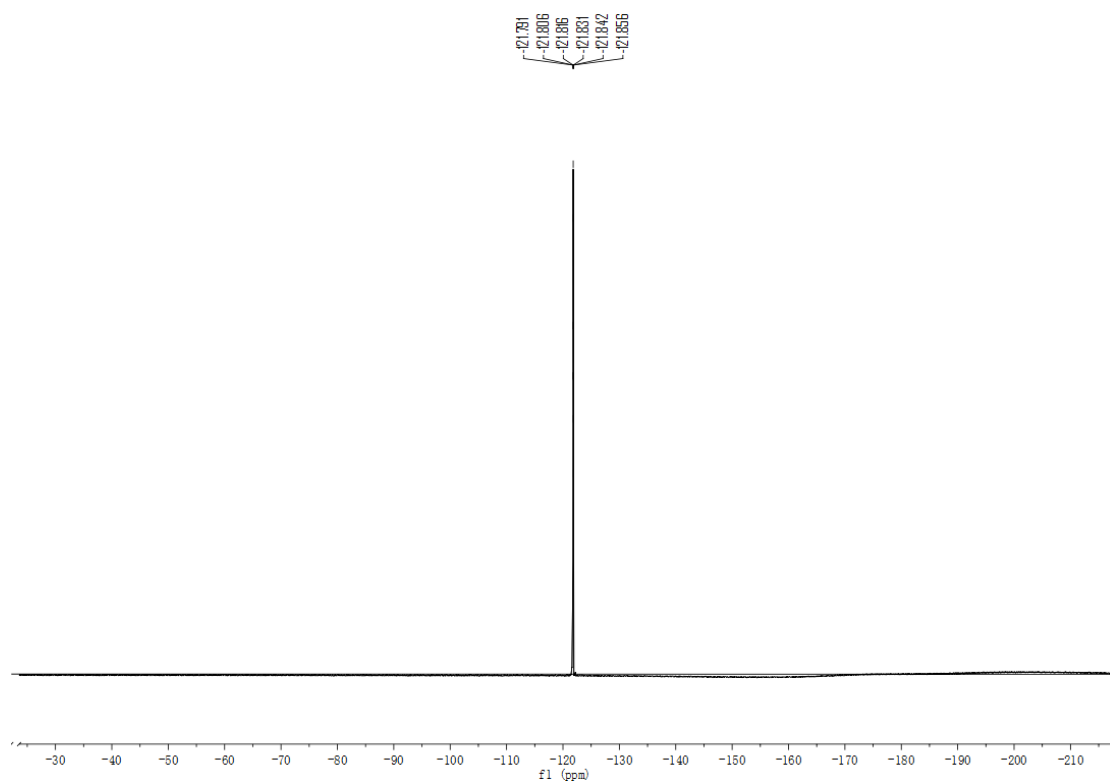

**DEPT**

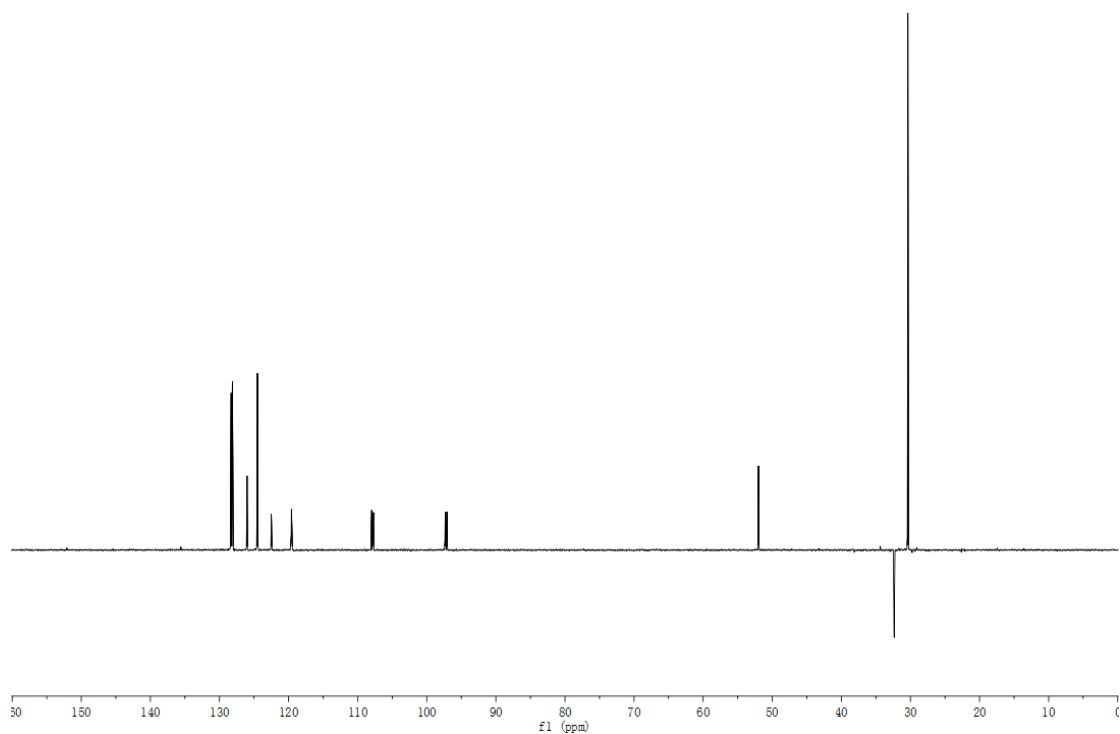

**2-(3,5-di-tert-butyl-4-hydroxyphenyl)-1-(1H-indol-3-yl)-2-phenylethan-1-one (40)**  
<sup>1</sup>H NMR (400 MHz, CDCl<sub>3</sub>):

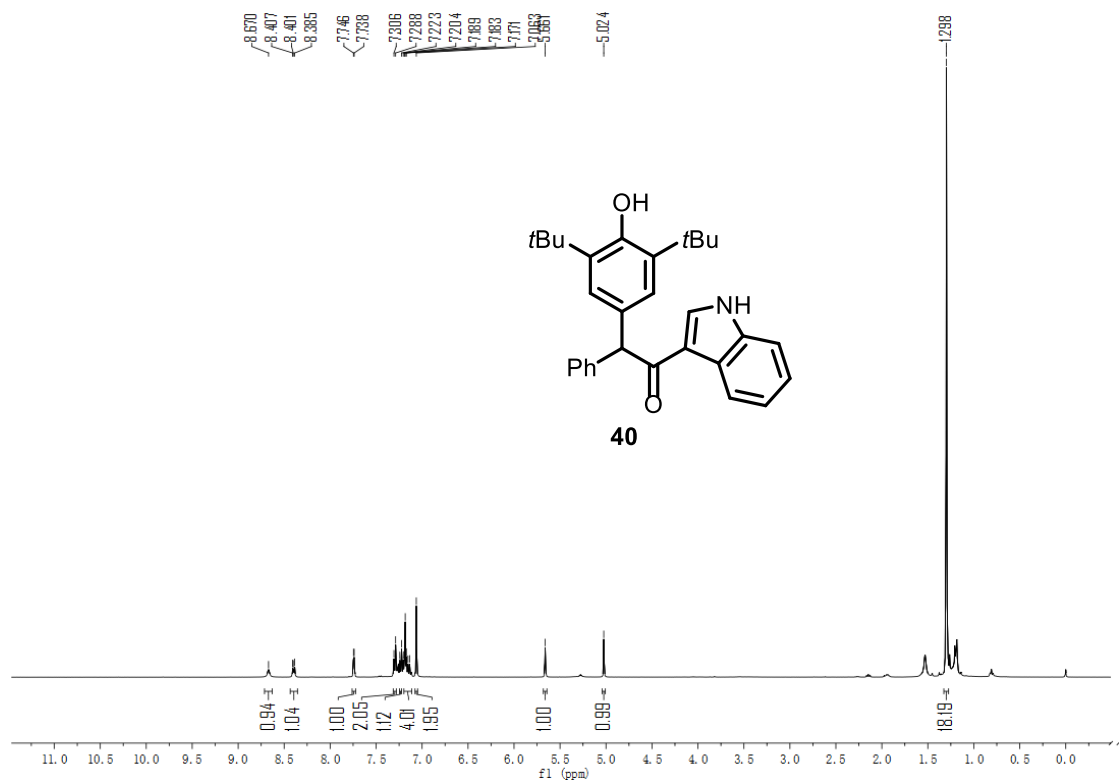

<sup>13</sup>C NMR (100 MHz, CDCl<sub>3</sub>):

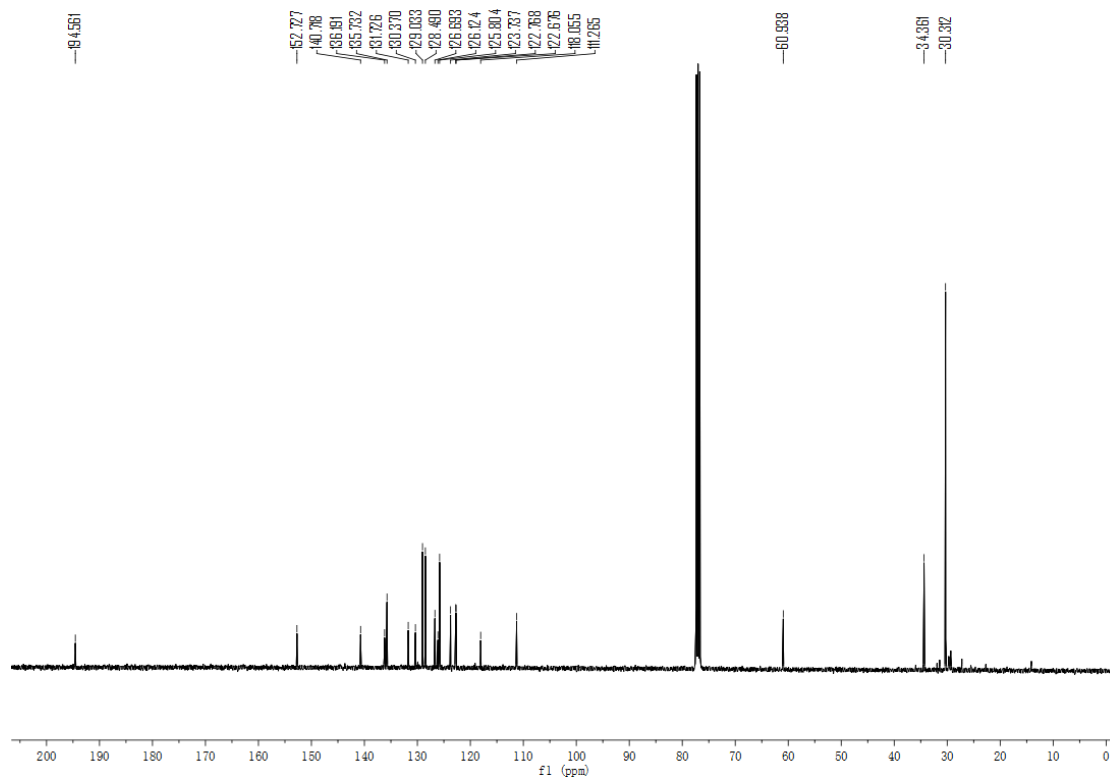

**DEPT**

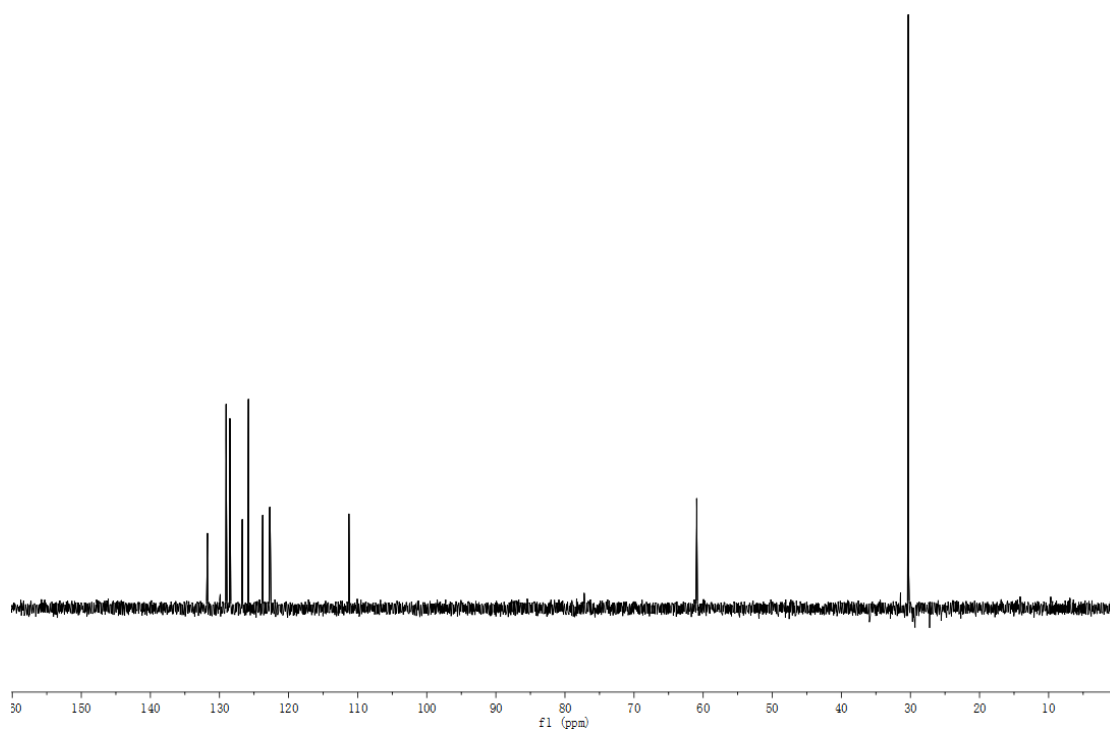

**4-(2-(3,5-di-tert-butyl-4-hydroxyphenyl)-2-phenylethyl)benzointrile (41)**  
 $^1\text{H}$  NMR (400 MHz,  $\text{CDCl}_3$ ):

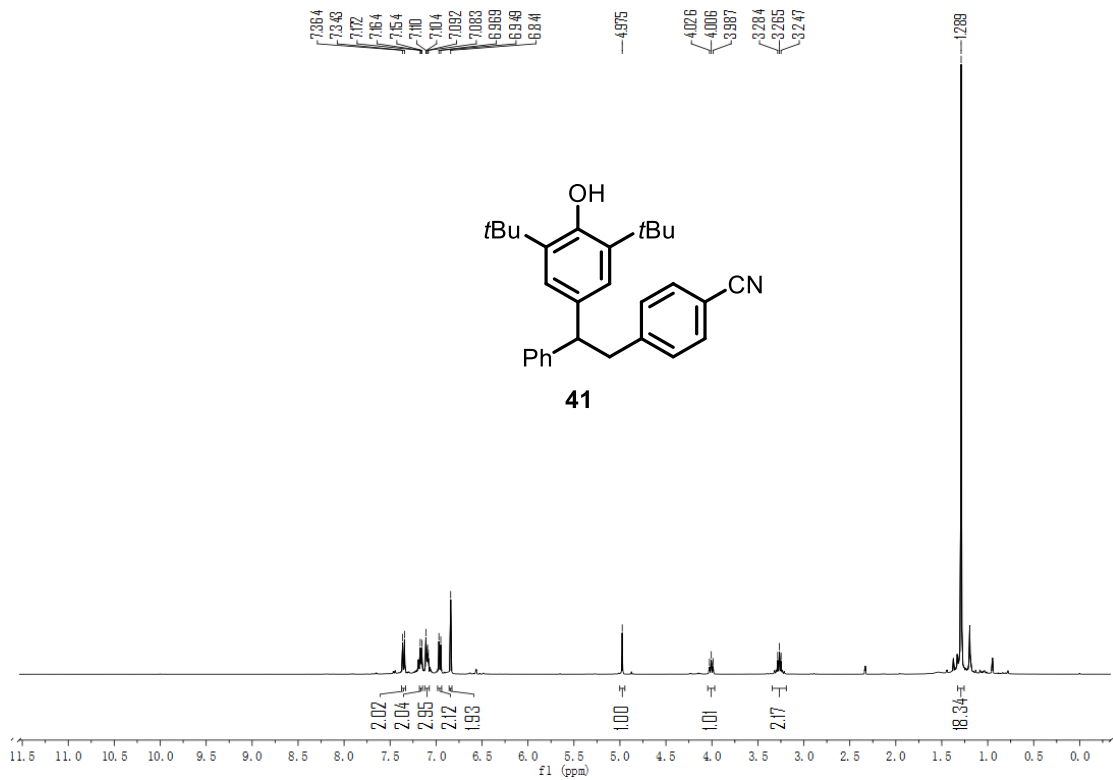

**<sup>13</sup>C NMR (100 MHz, CDCl<sub>3</sub>):**

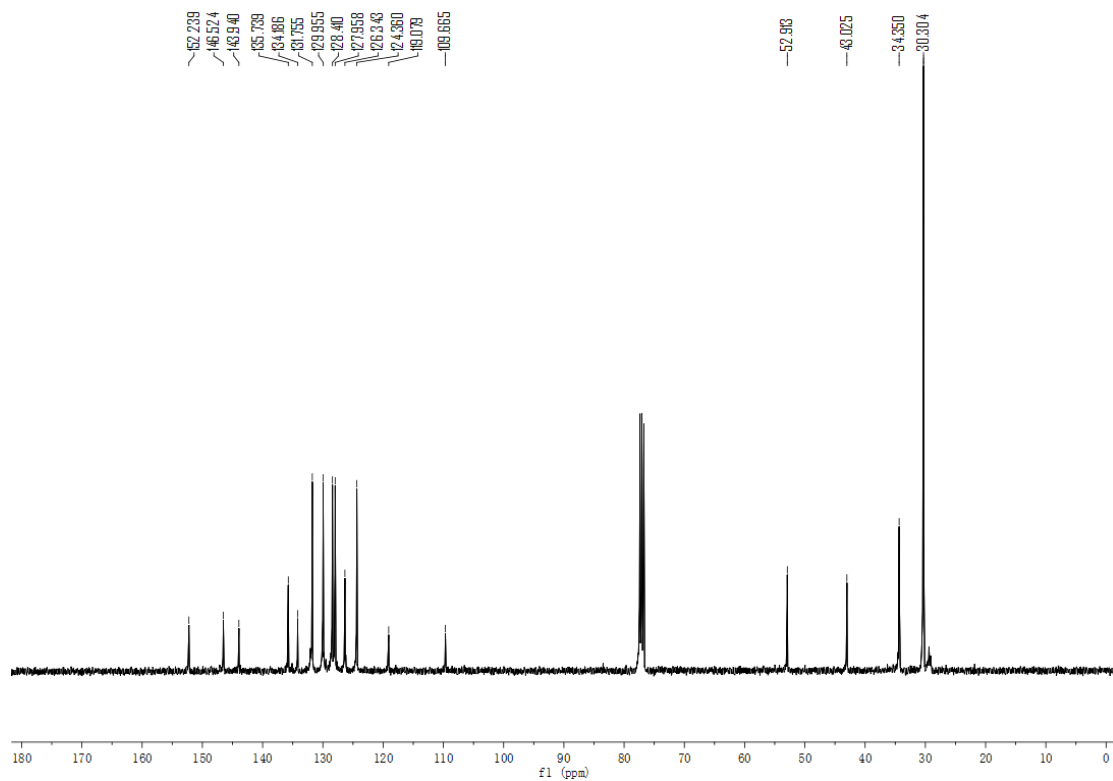

**DEPT**

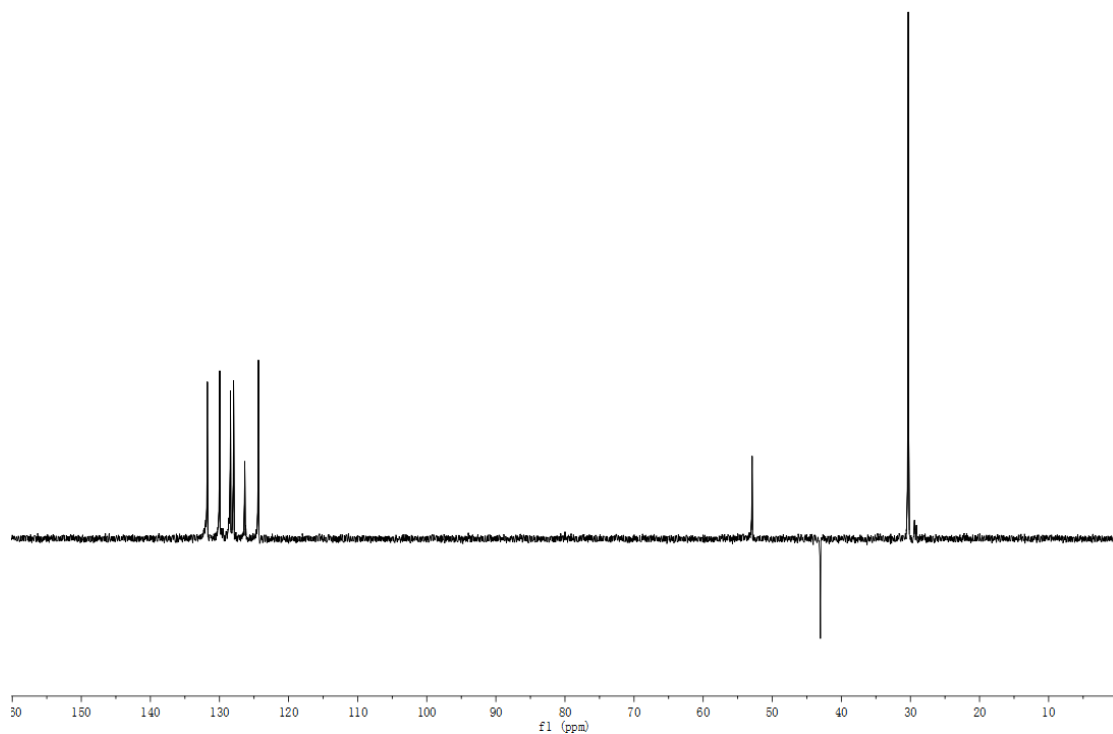

**2,6-di-tert-butyl-4-(2-(4-nitrophenyl)-1-phenylethyl)phenol (42)**

**<sup>1</sup>H NMR (400 MHz, CDCl<sub>3</sub>):**

7.952, 7.930, 7.203, 7.184, 7.166, 7.120, 7.101, 7.034, 7.016, 6.871, 4.989, 4.062, 4.042, 4.023, 3.340, 3.330, 3.320, 3.302, 3.297, 1.298

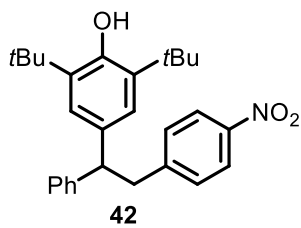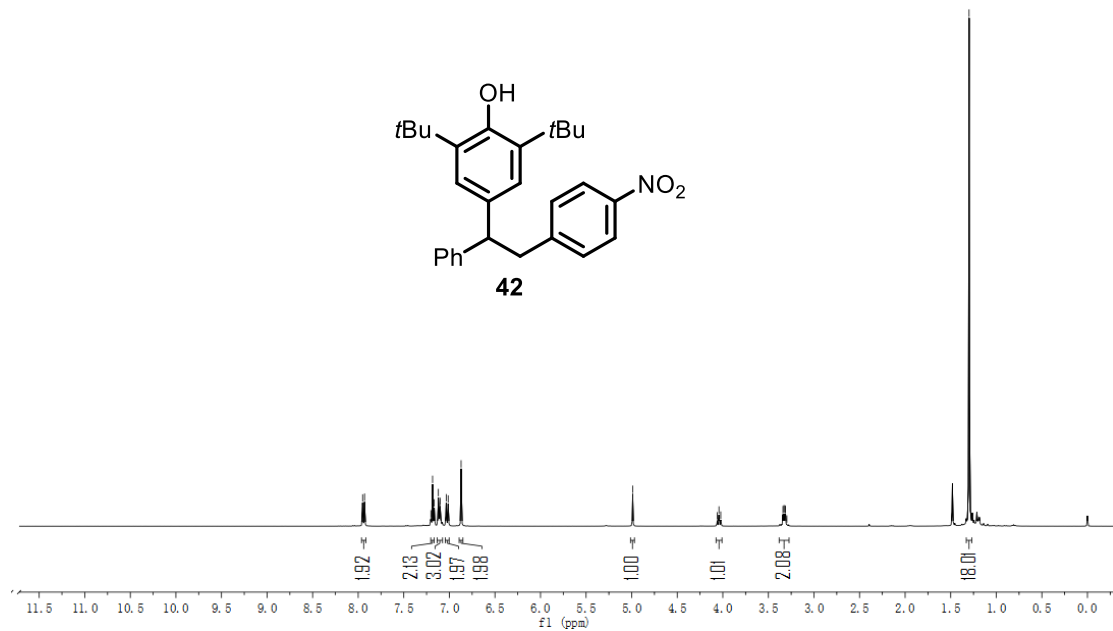

**<sup>13</sup>C NMR (100 MHz, CDCl<sub>3</sub>):**

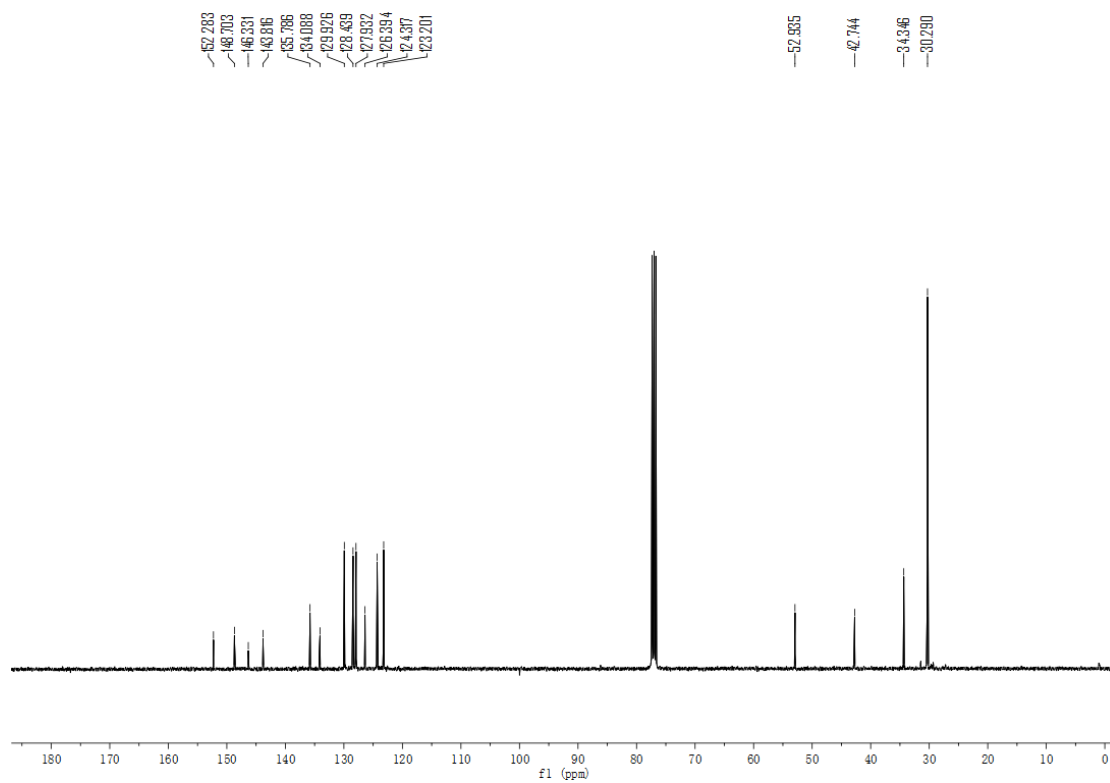

**DEPT**

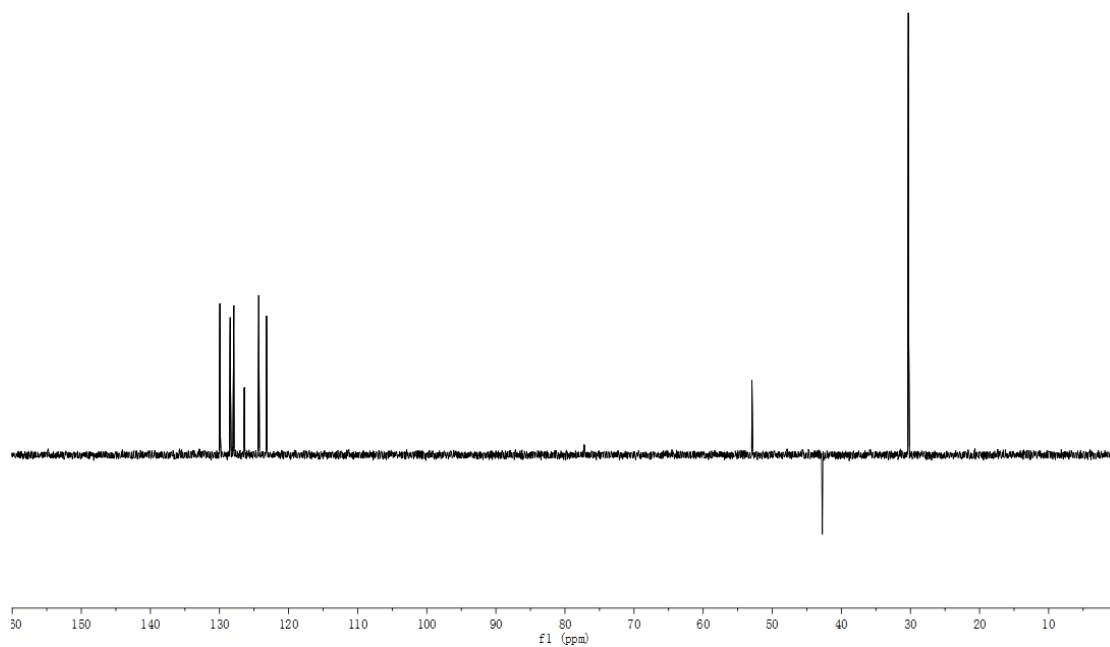

**2,6-di-tert-butyl-4-(2-(4-methyl-2-nitrophenyl)-1-phenylethyl)phenol (43)**  
<sup>1</sup>H NMR (400 MHz, CDCl<sub>3</sub>):

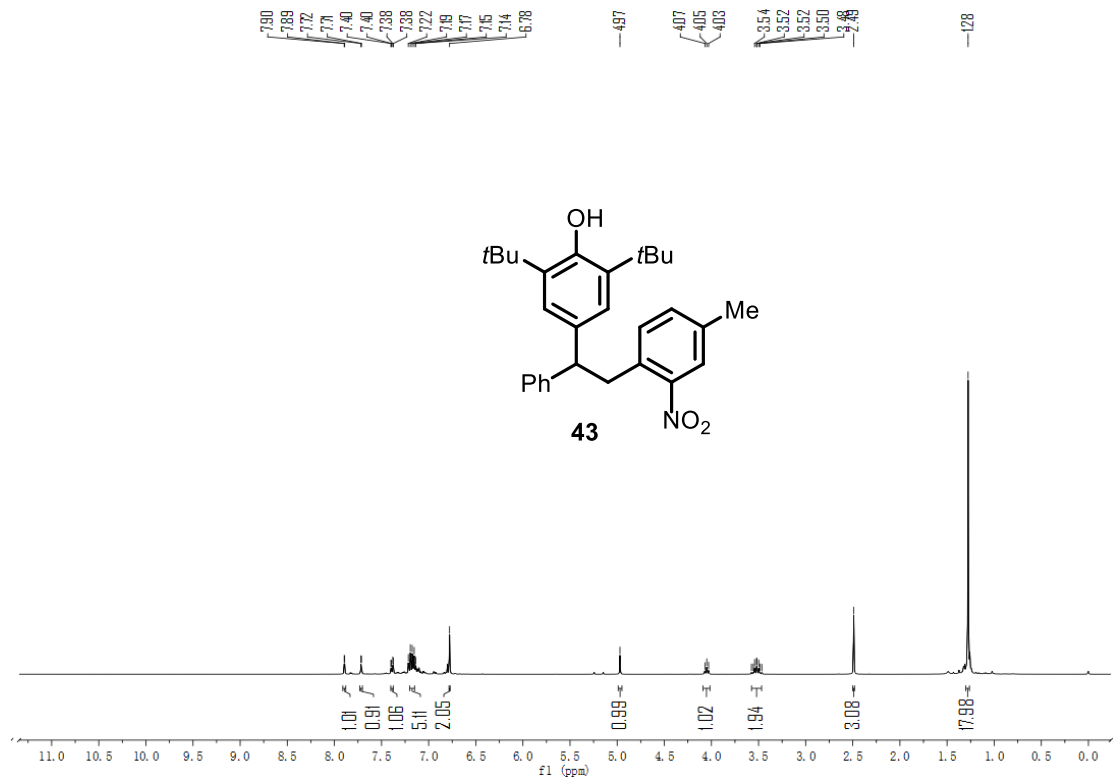

<sup>13</sup>C NMR (100 MHz, CDCl<sub>3</sub>):

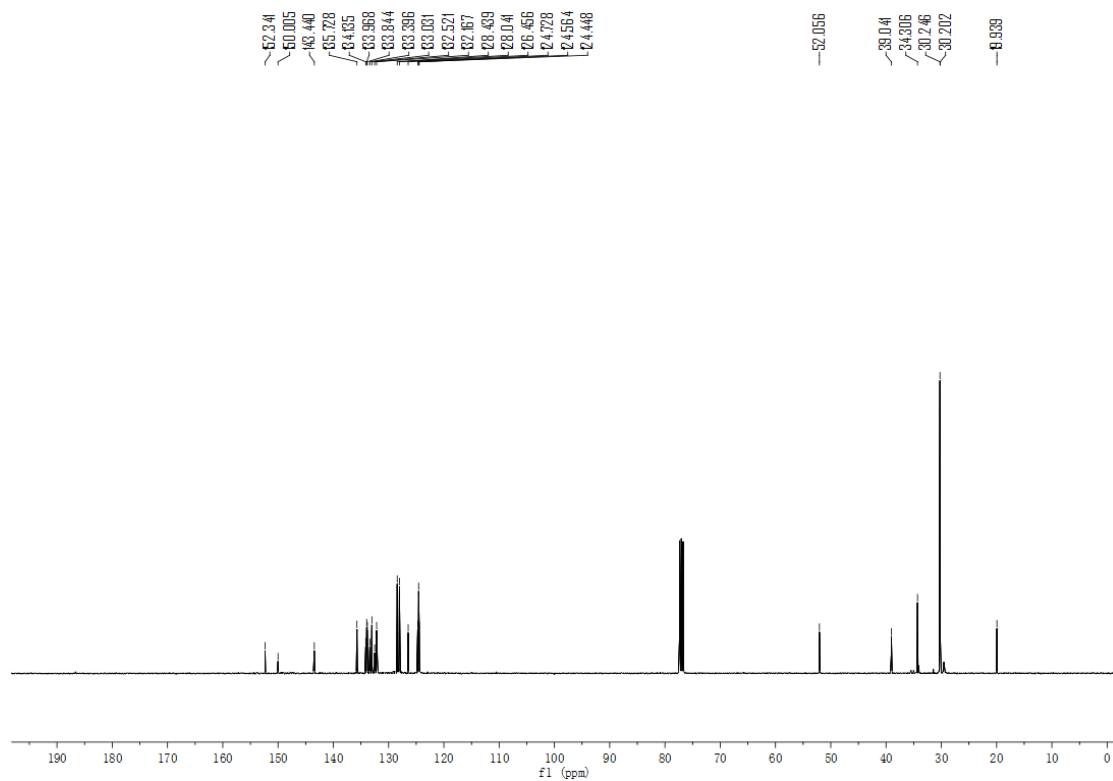

**DEPT**



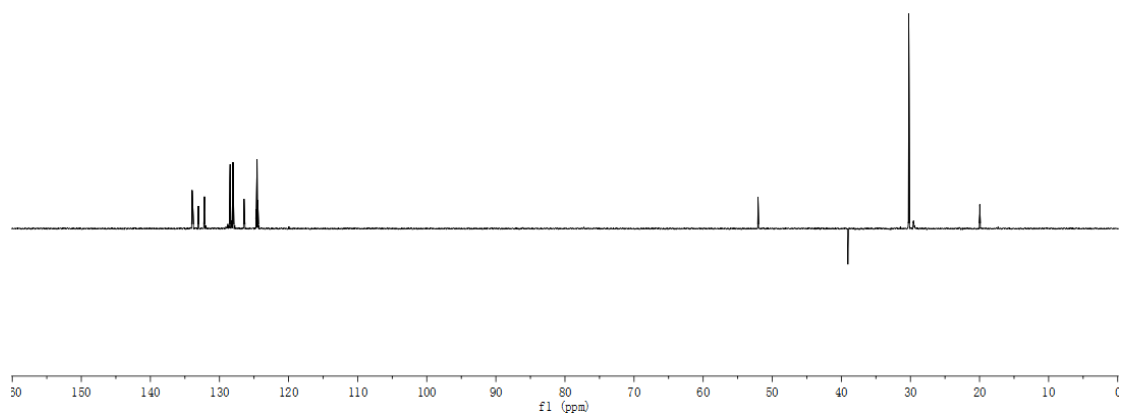

**2,6-di-tert-butyl-4-(2-(3-methyl-5-nitrophenyl)-1-phenylethyl)phenol (44)**

**<sup>1</sup>H NMR (400 MHz, CDCl<sub>3</sub>):**

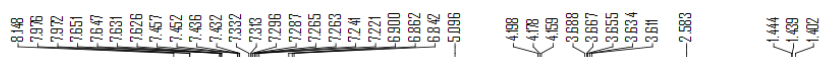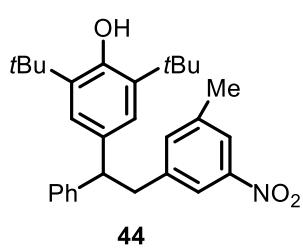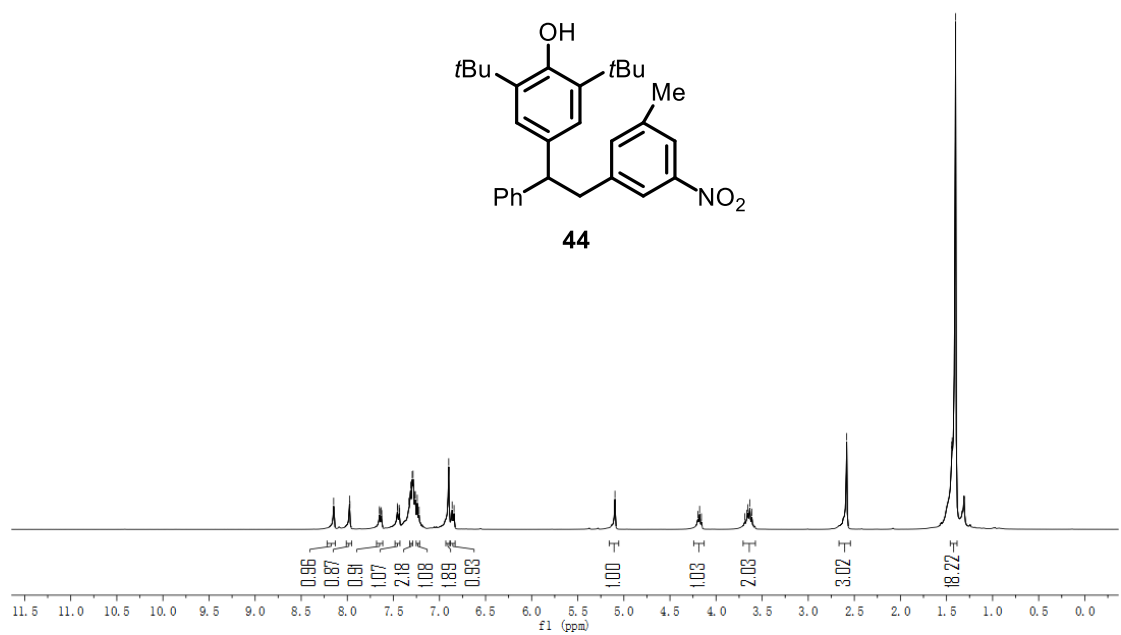

**<sup>13</sup>C NMR (100 MHz, CDCl<sub>3</sub>):**

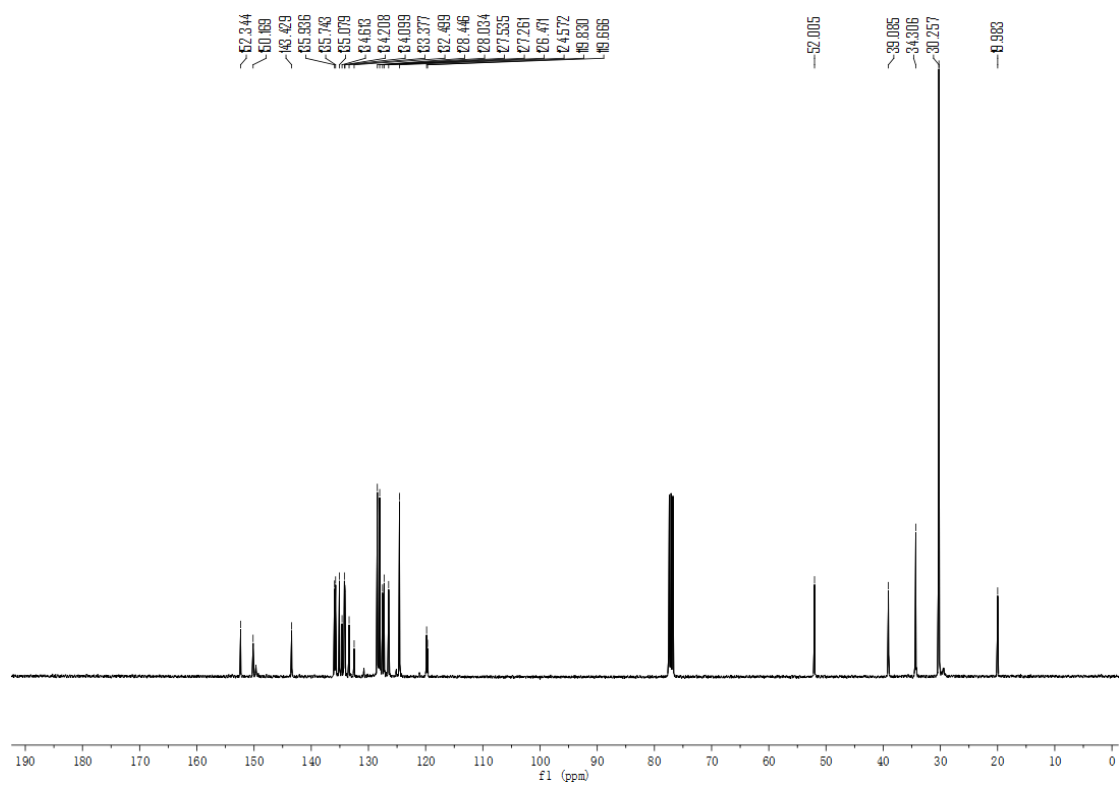

**DEPT**

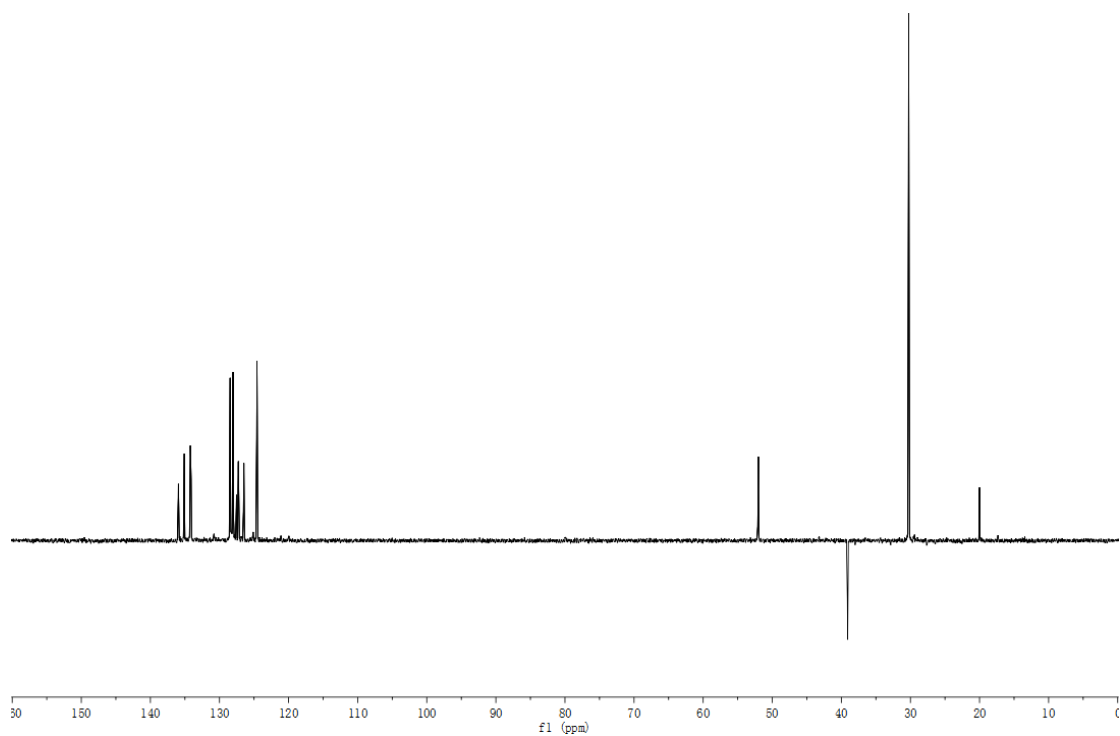

**4-(2-(1H-indol-3-yl)-1-phenylethyl)-2-(tert-butyl)phenol (46)**

**<sup>1</sup>H NMR (400 MHz, CDCl<sub>3</sub>):**

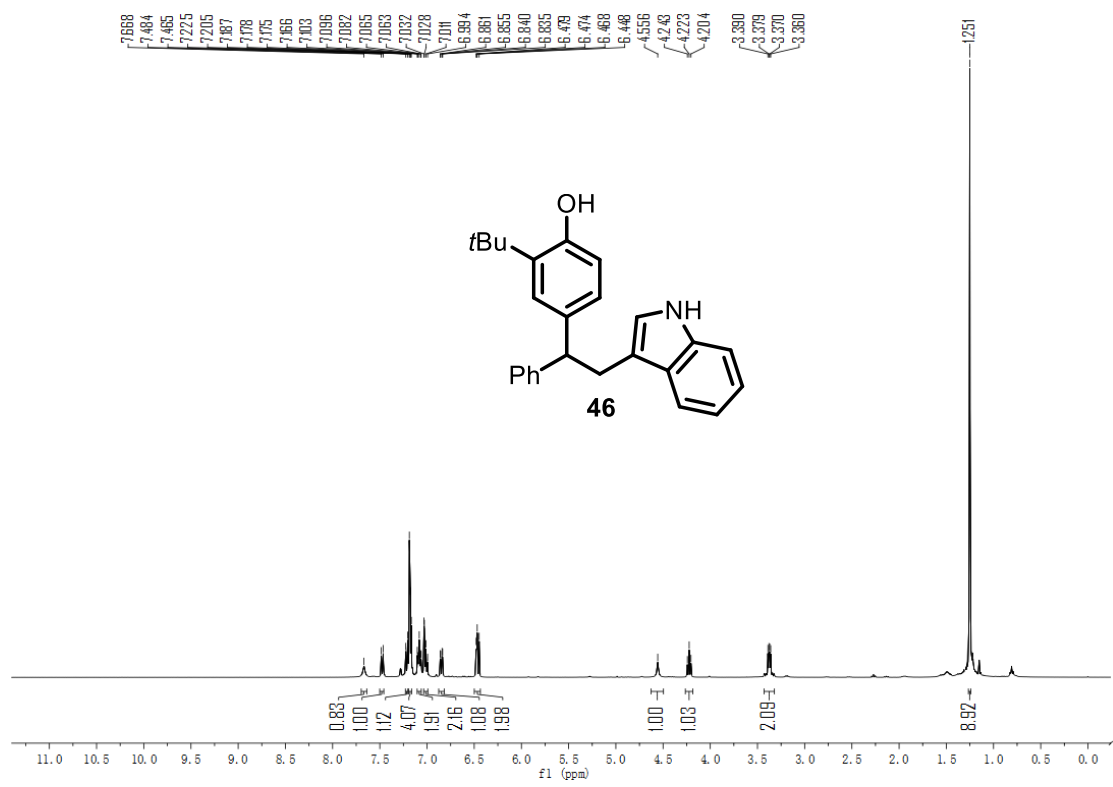

<sup>13</sup>C NMR (100 MHz, CDCl<sub>3</sub>):

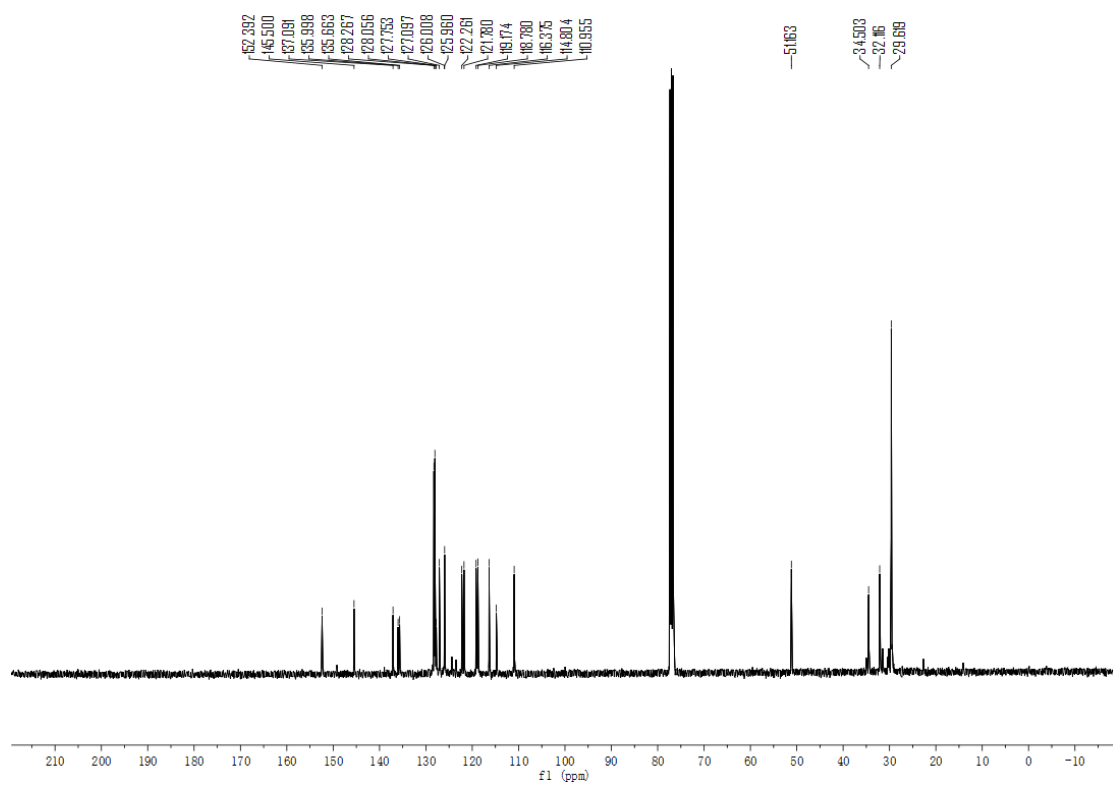

DEPT

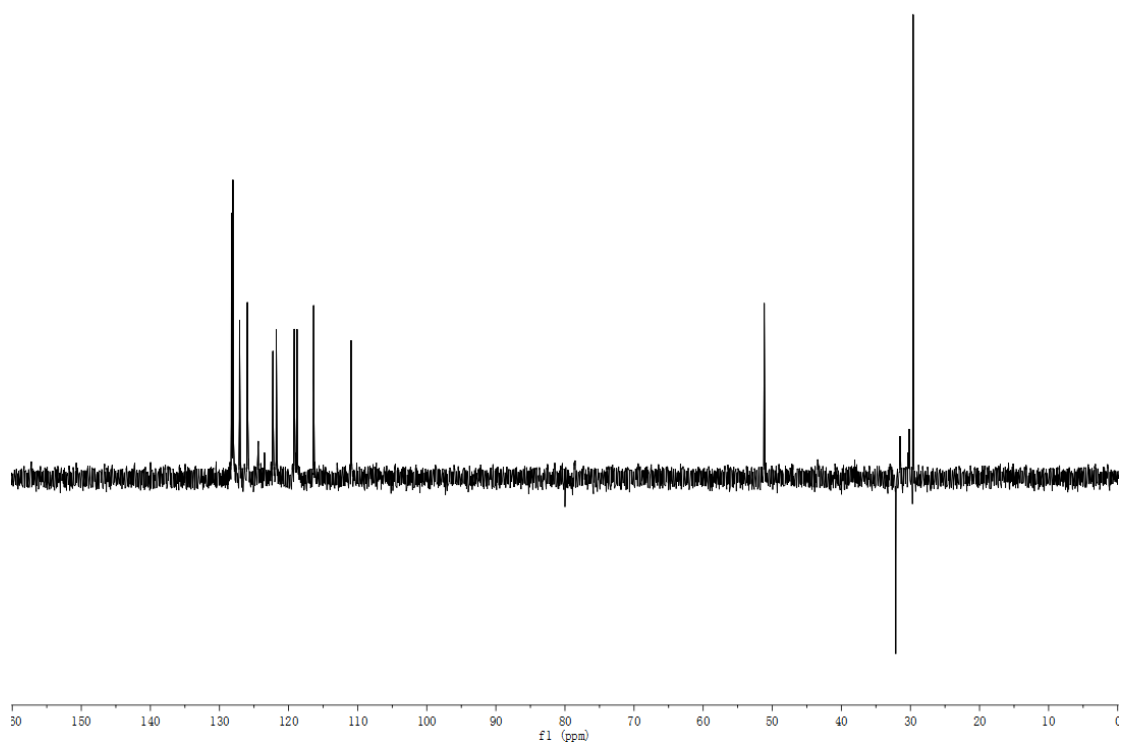

**3,5-di-tert-butyl-2'-phenyl-1',4'-dihydro-2'H-spiro[cyclohexane-1,3'-cyclopenta[b]indole]-2,5-dien-4-one (47)**

**<sup>1</sup>H NMR (400 MHz, CDCl<sub>3</sub>):**

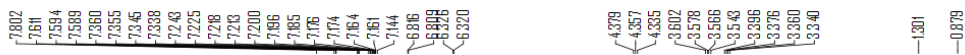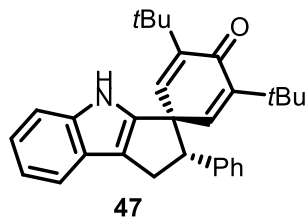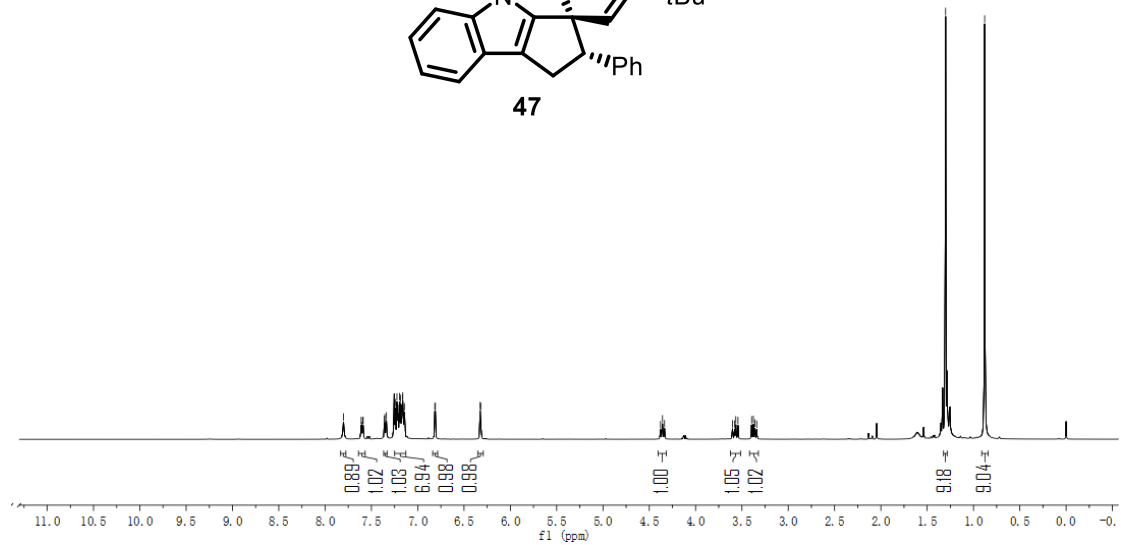

**<sup>13</sup>C NMR (100 MHz, CDCl<sub>3</sub>):**

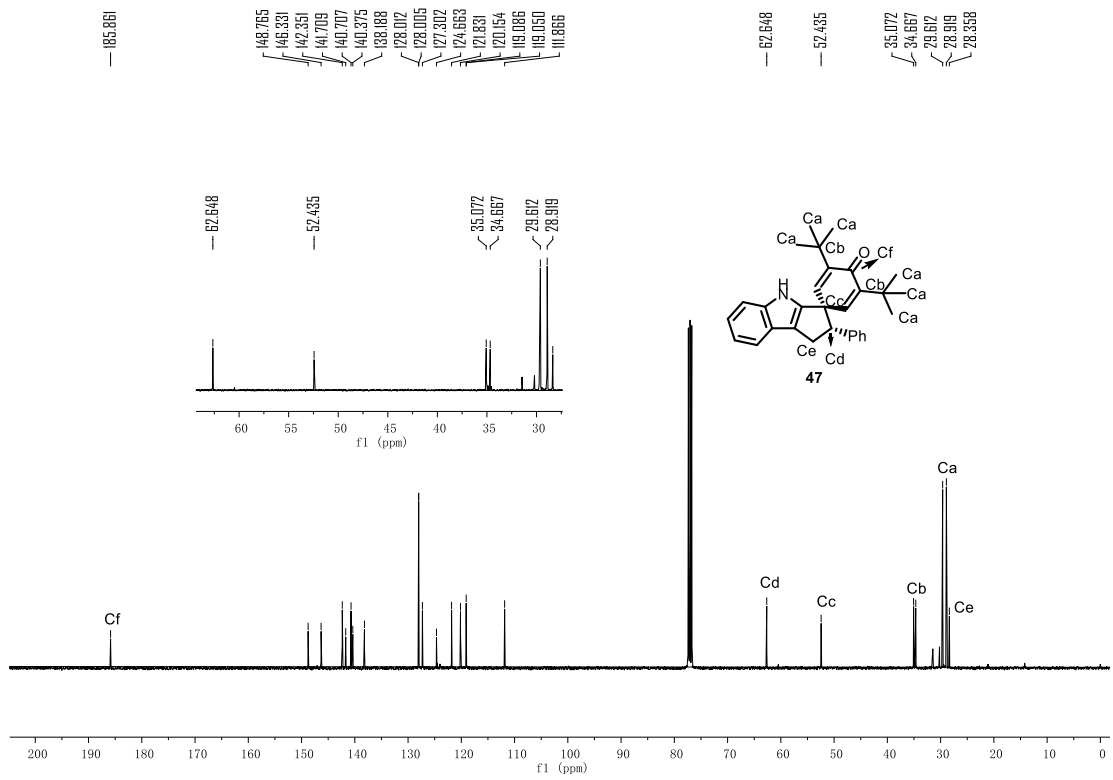

**DEPT**

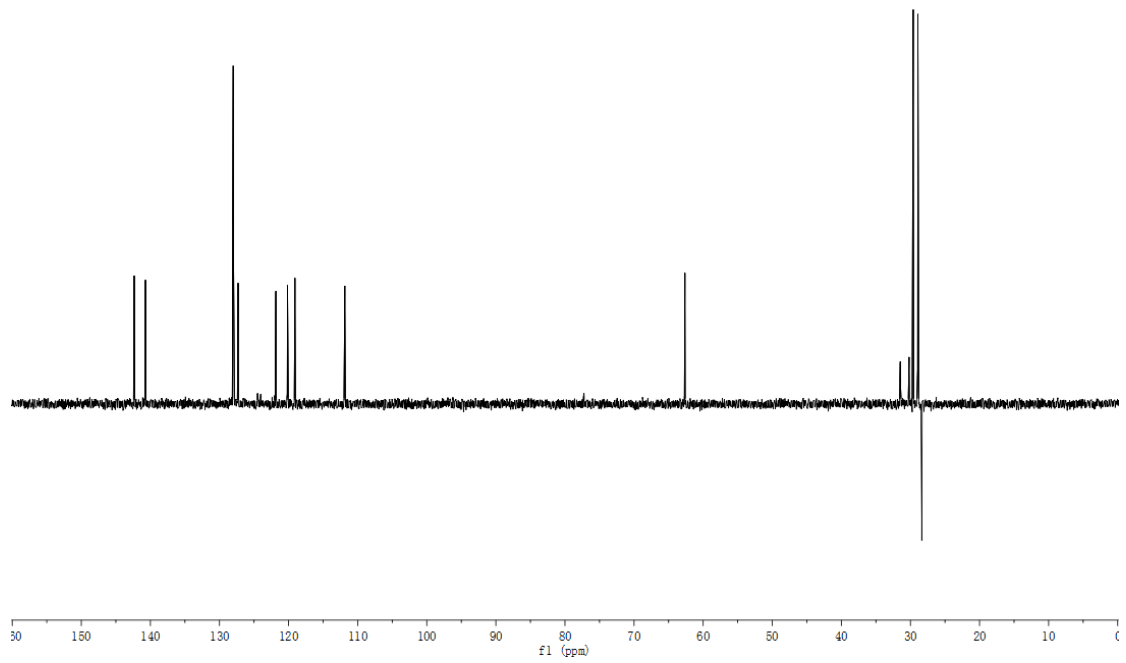

**HMBC**

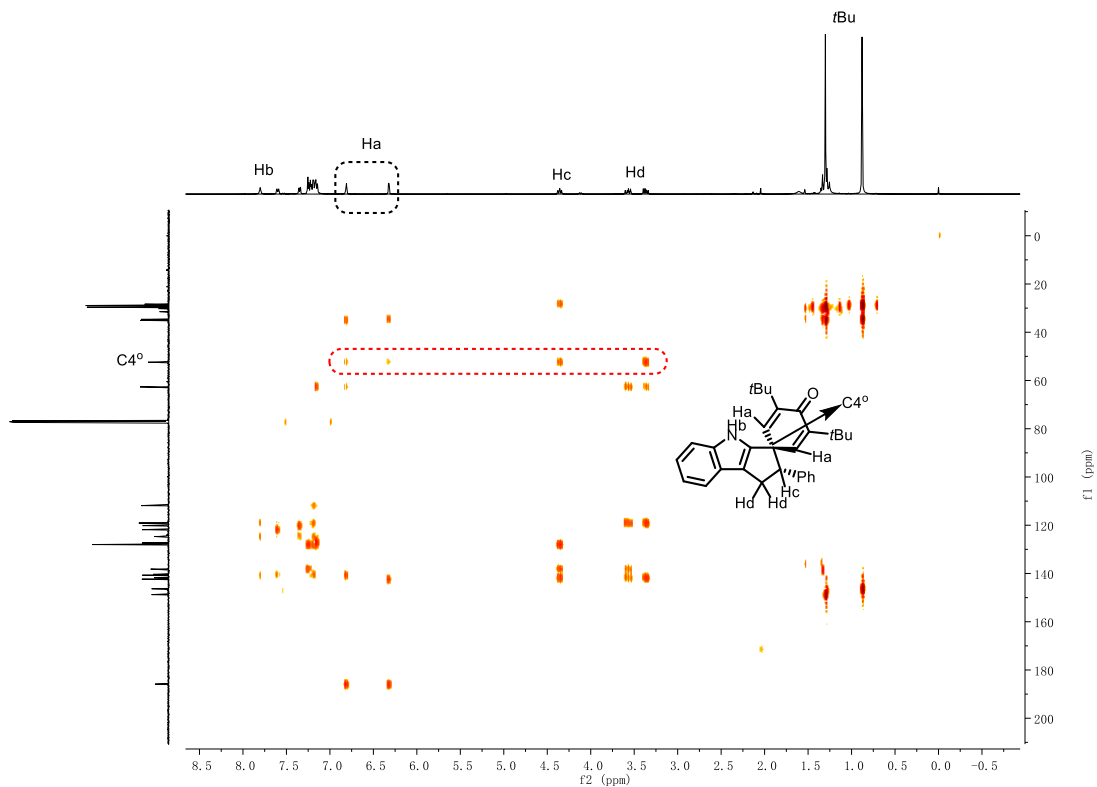

*HSQC*

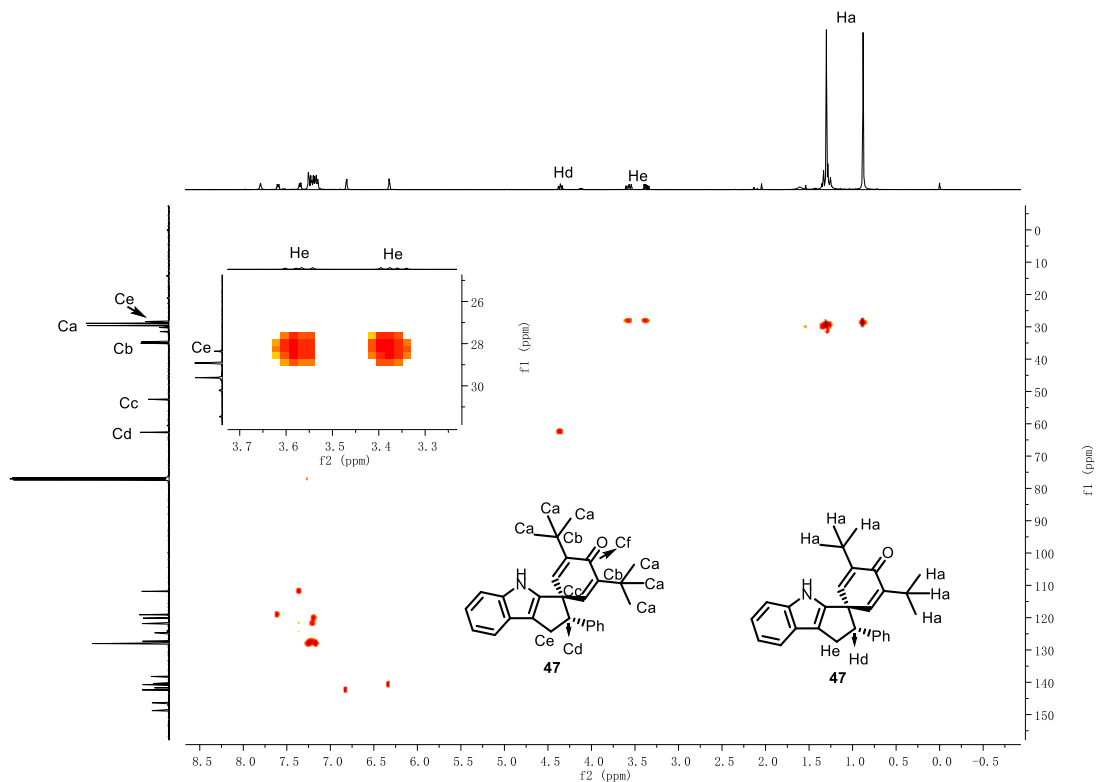

**3,5-di-tert-butyl-7'-methyl-2'-phenyl-1',4'-dihydro-2'H-spiro[cyclohexane-1,3'-cyclopenta[b]indole]-2,5-dien-4-one (48)**

**$^1\text{H}$  NMR (400 MHz,  $\text{CDCl}_3$ ):**

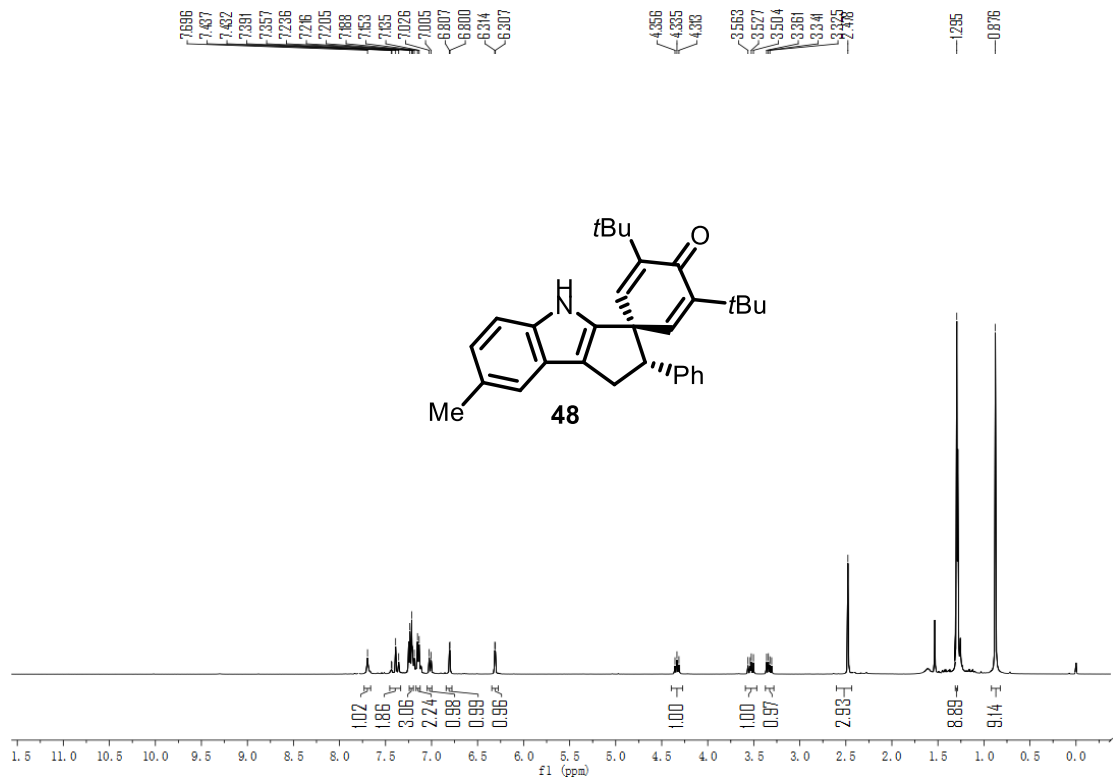

<sup>13</sup>C NMR (100 MHz, CDCl<sub>3</sub>):

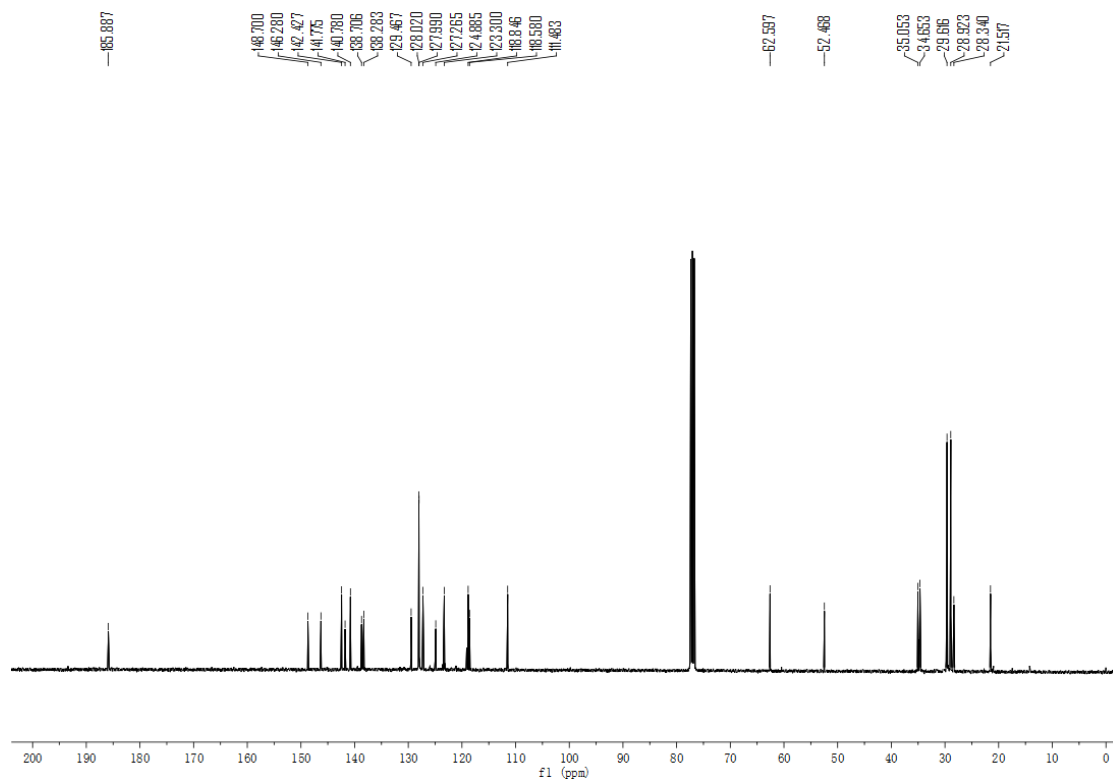

DEPT

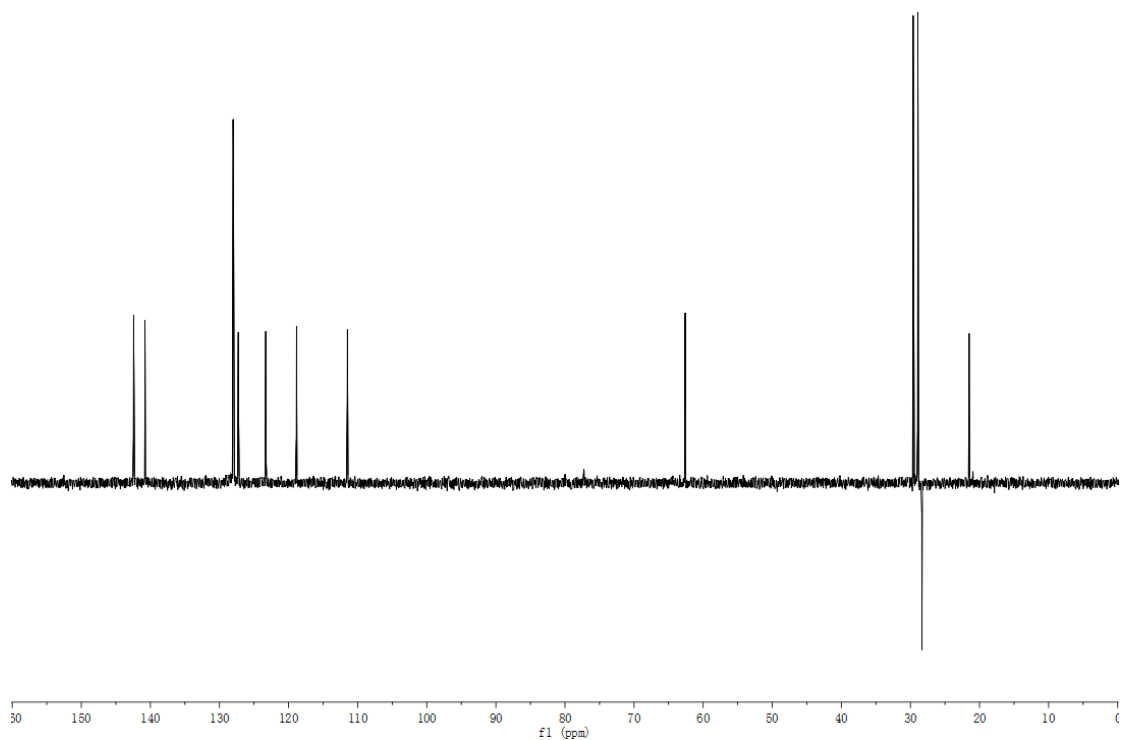

**3,5-di-tert-butyl-7'-methoxy-2'-phenyl-1',4'-dihydro-2'H-spiro[cyclohexane-1,3'-cyclopenta[b]indole]-2,5-dien-4-one (49)**

**<sup>1</sup>H NMR (400 MHz, CDCl<sub>3</sub>):**

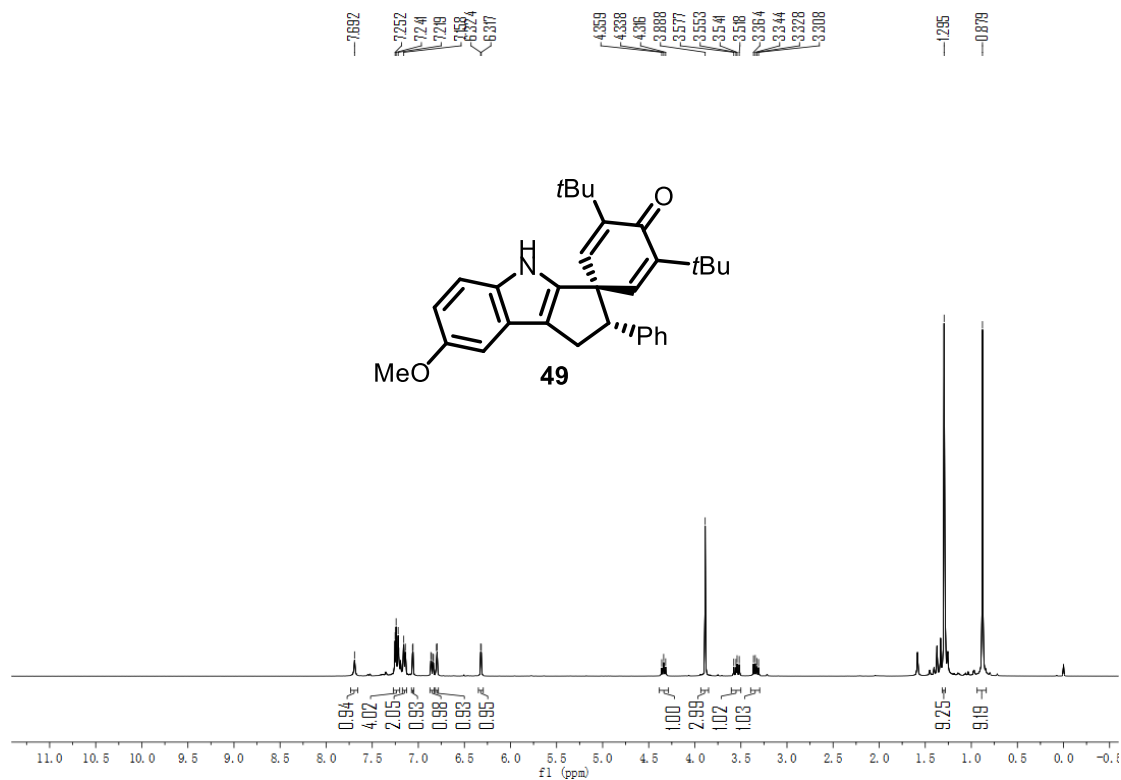

**<sup>13</sup>C NMR (100 MHz, CDCl<sub>3</sub>):**



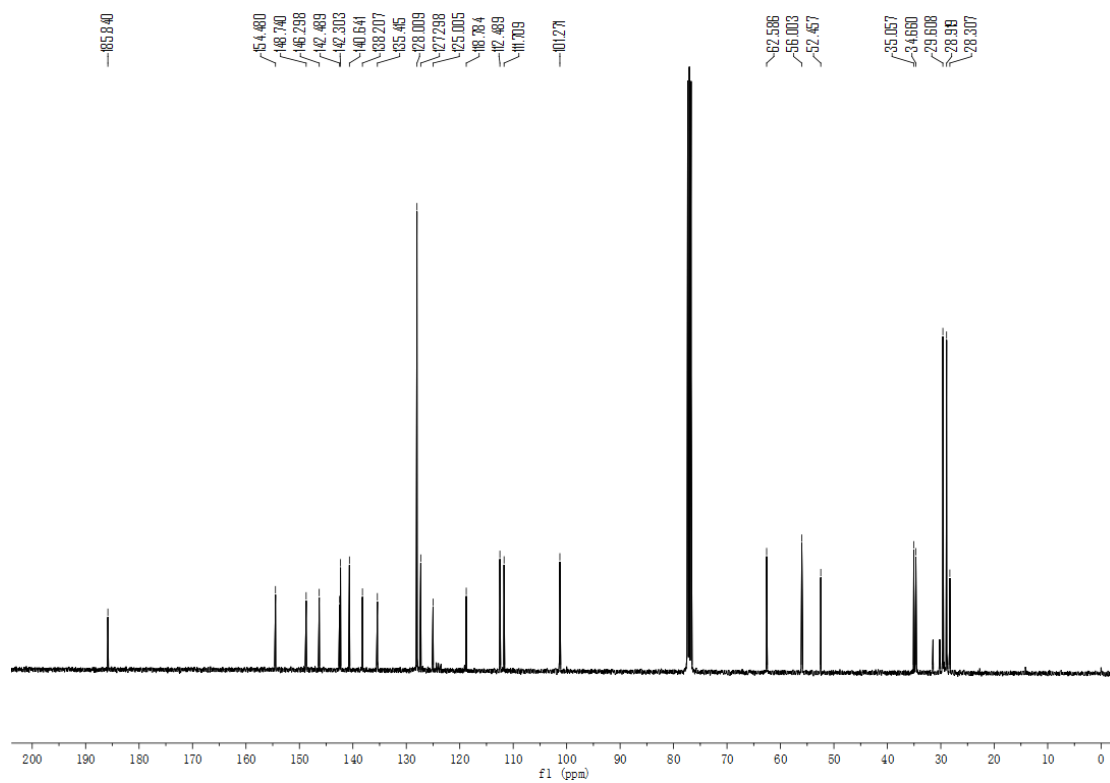

**DEPT**

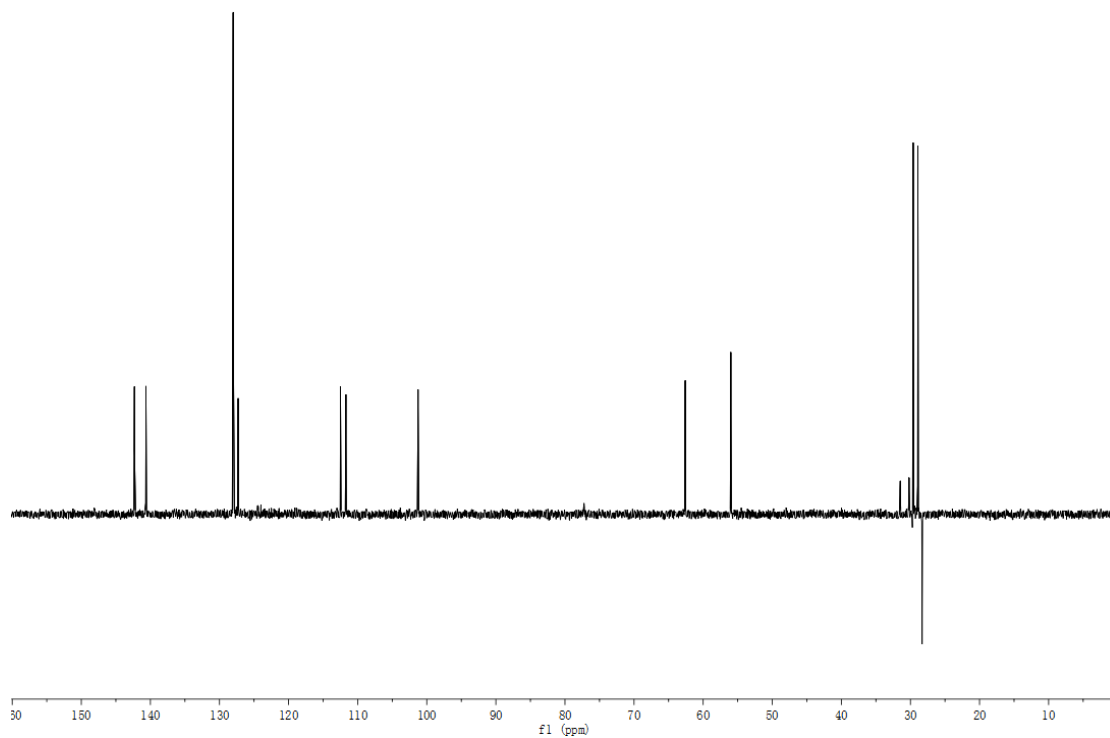

**3,5-di-tert-butyl-7'-fluoro-2'-phenyl-1',4'-dihydro-2'H-spiro[cyclohexane-1,3'-cyclopenta[b]indole]-2,5-dien-4-one (50)**

**<sup>1</sup>H NMR (400 MHz, CDCl<sub>3</sub>):**

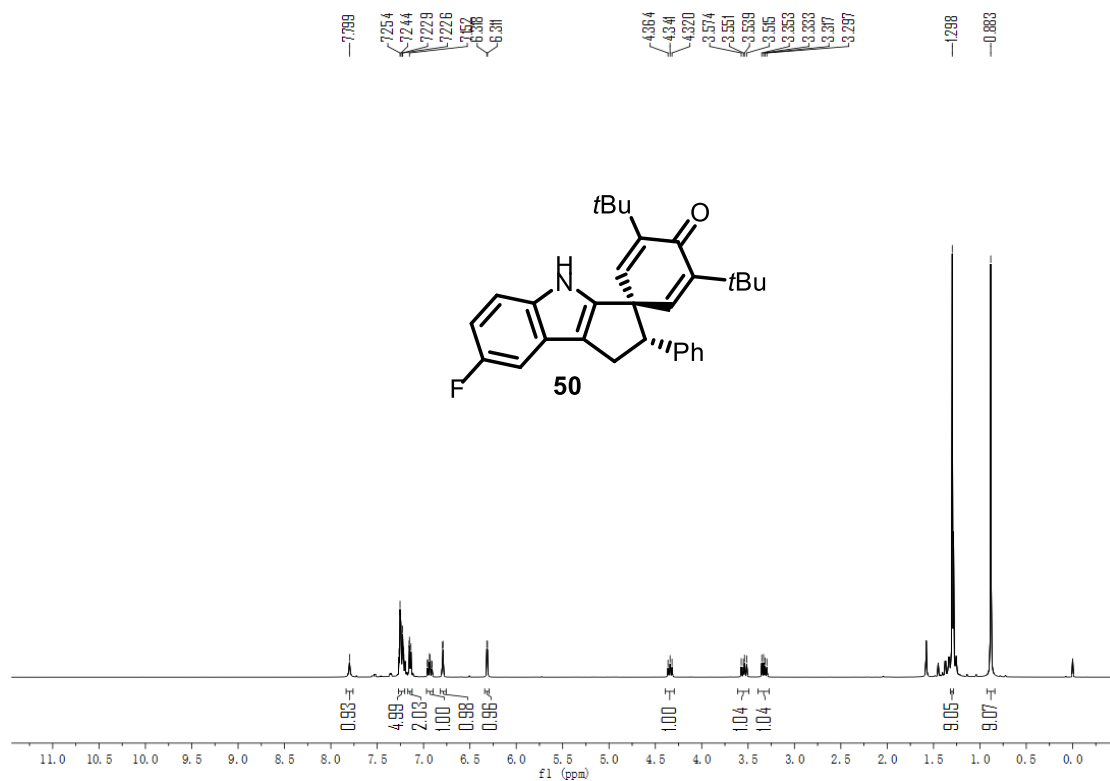

**<sup>13</sup>C NMR (100 MHz, CDCl<sub>3</sub>):**

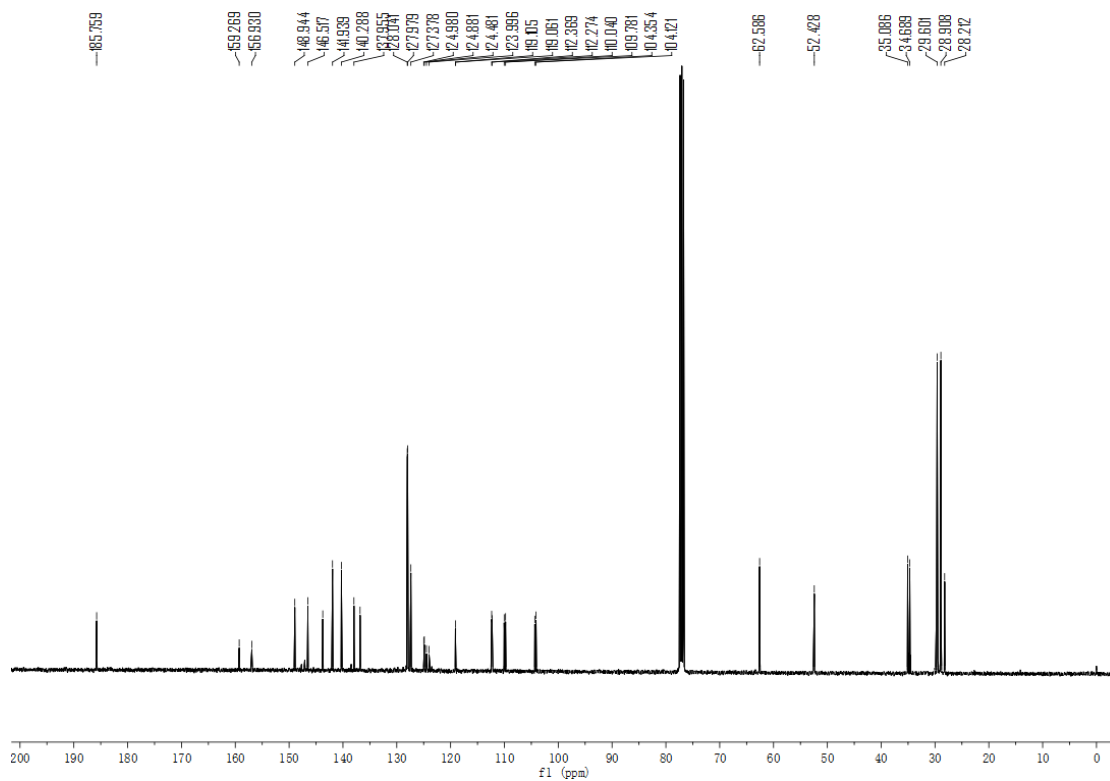

**<sup>19</sup>F NMR (376 MHz, CDCl<sub>3</sub>):**

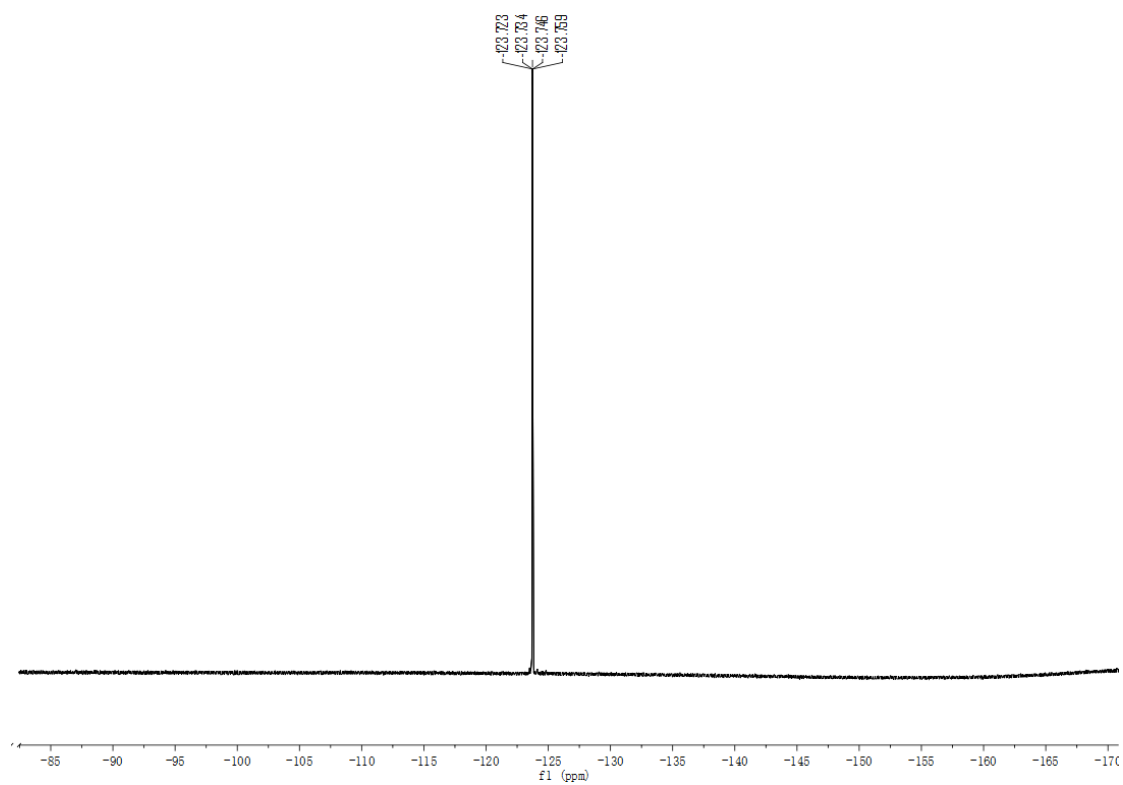

**DEPT**

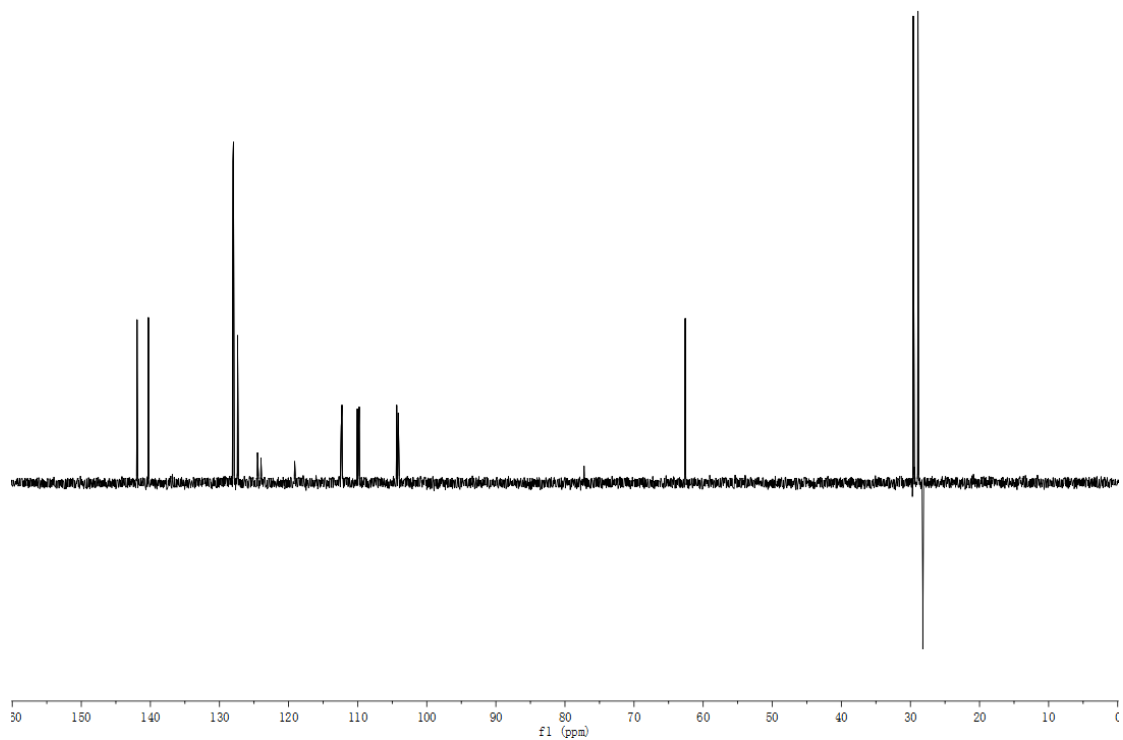

***3,5-di-tert-butyl-7'-chloro-2'-phenyl-1',4'-dihydro-2'H-spiro[cyclohexane-1,3'-cyclopenta[b]indole]-2,5-dien-4-one (51)***

**<sup>1</sup>H NMR (400 MHz, CDCl<sub>3</sub>):**

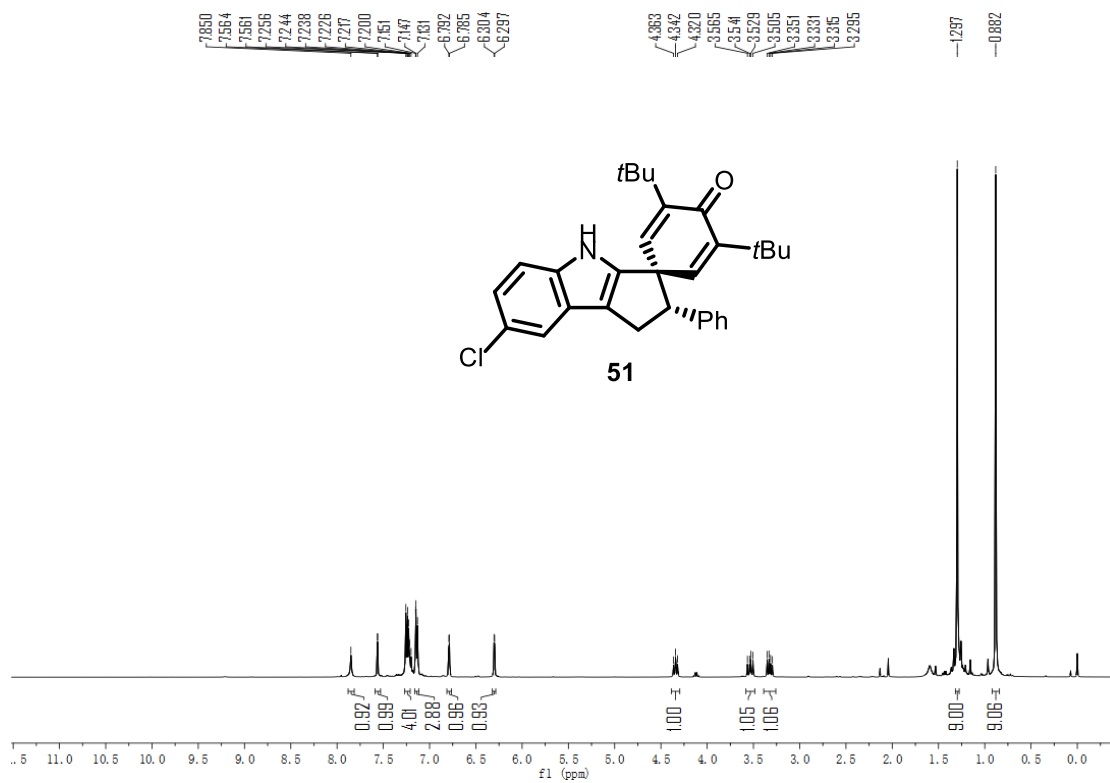

**<sup>13</sup>C NMR (100 MHz, CDCl<sub>3</sub>):**

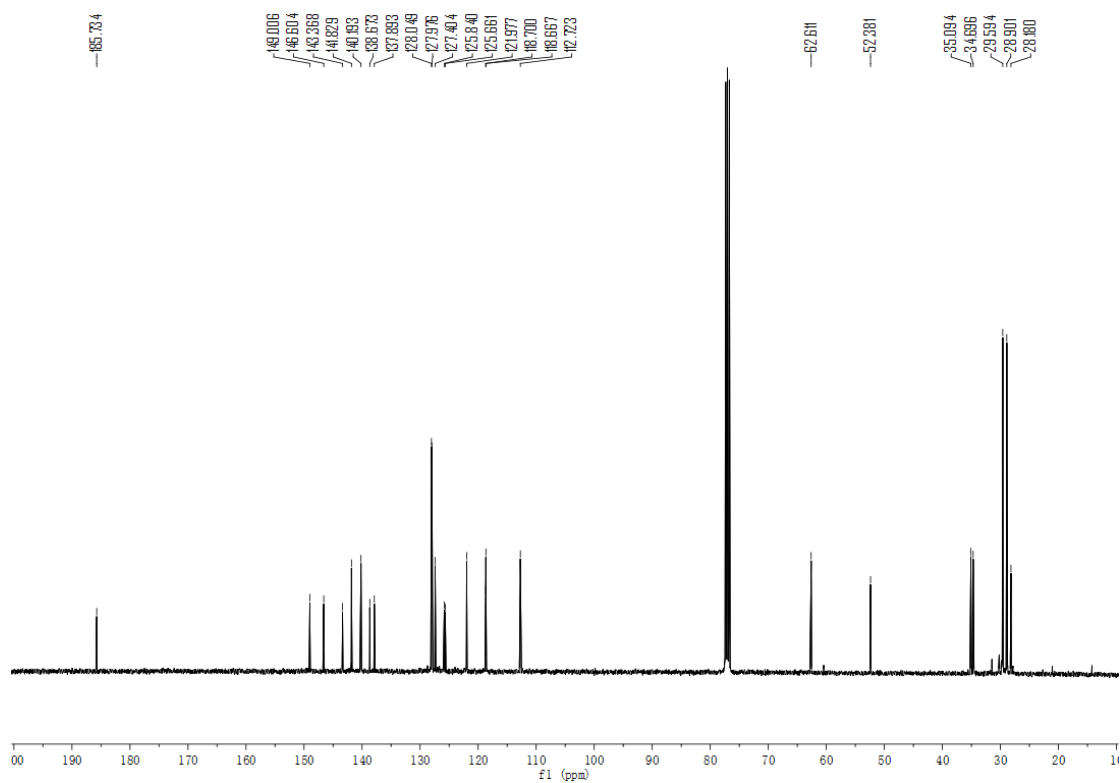

**DEPT**

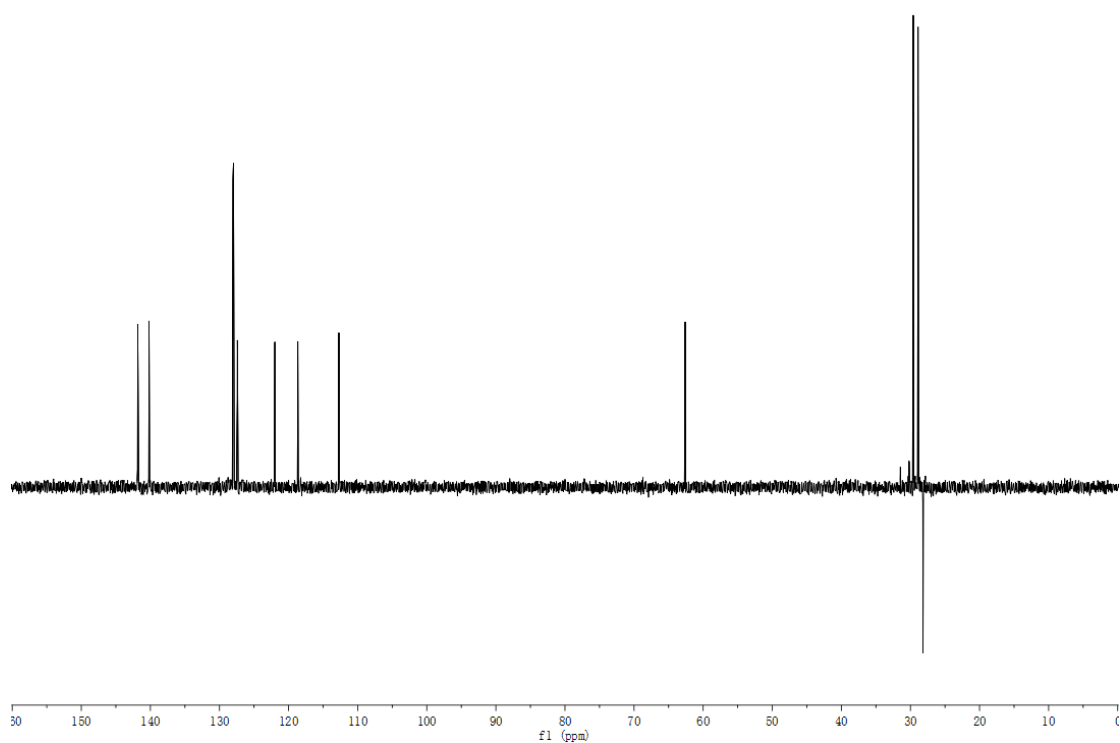

**7'-bromo-3,5-di-tert-butyl-2'-phenyl-1',4'-dihydro-2'H-spiro[cyclohexane-1,3'-cyclopenta[b]indole]-2,5-dien-4-one (52)**

**<sup>1</sup>H NMR (400 MHz, CDCl<sub>3</sub>):**

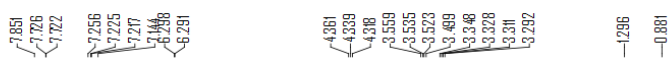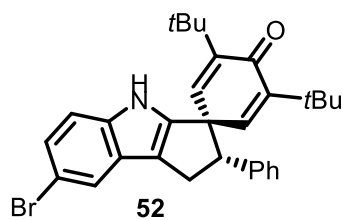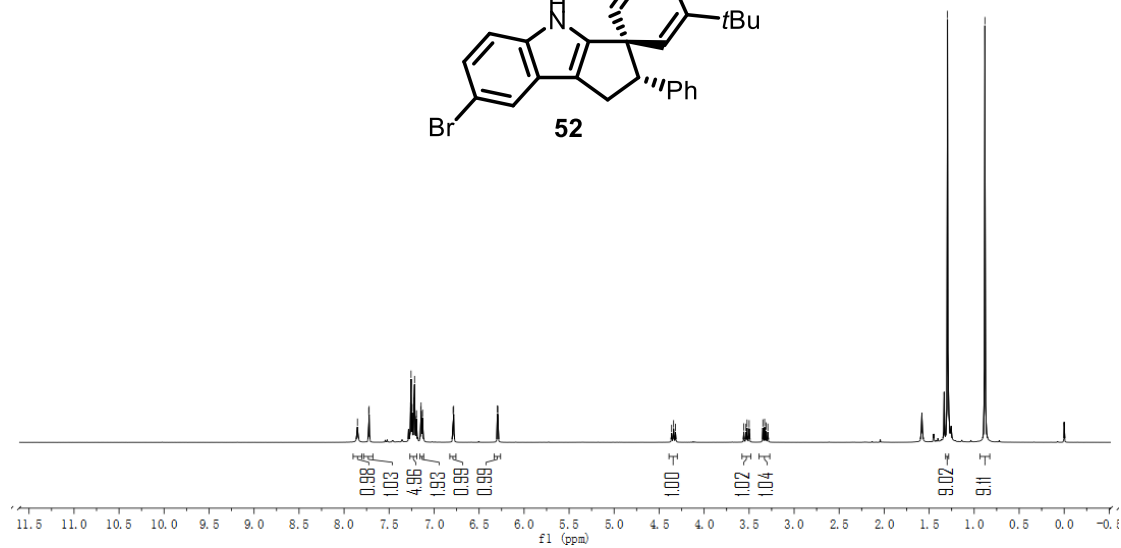

**<sup>13</sup>C NMR (100 MHz, CDCl<sub>3</sub>):**

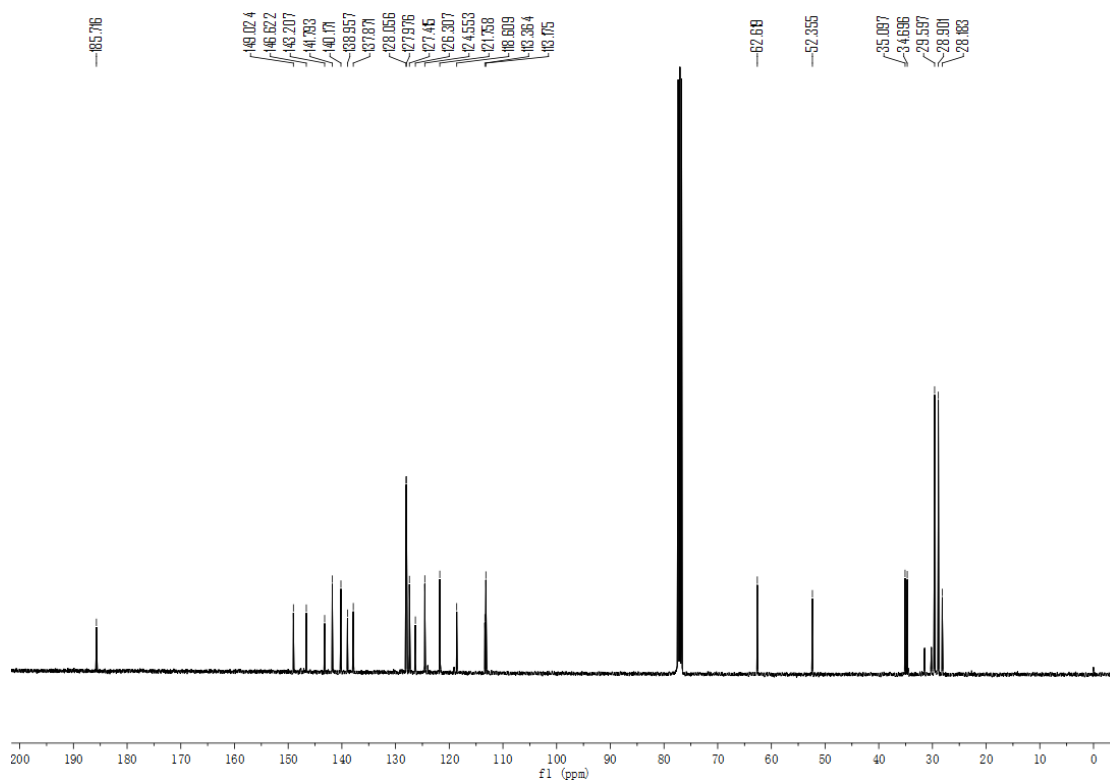

**DEPT**

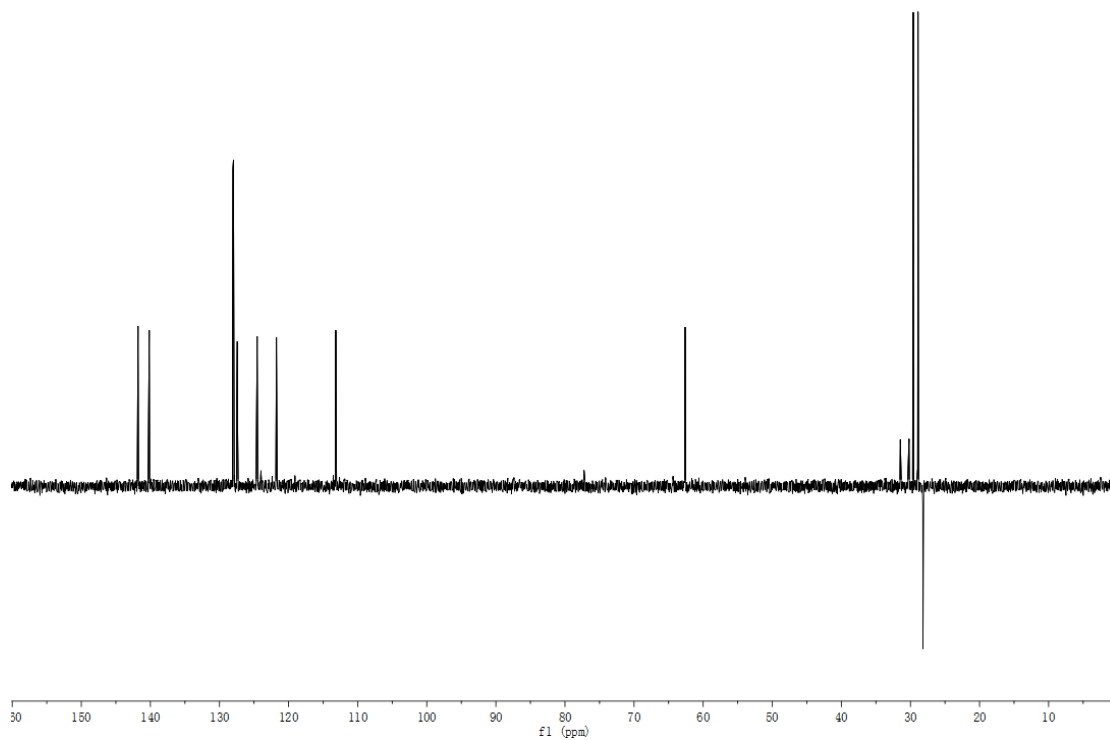

**3,5-di-tert-butyl-6'-fluoro-2'-phenyl-1',4'-dihydro-2'H-spiro[cyclohexane-1,3'-cyclopenta[b]indole]-2,5-dien-4-one (53)**

**<sup>1</sup>H NMR (400 MHz, CDCl<sub>3</sub>):**

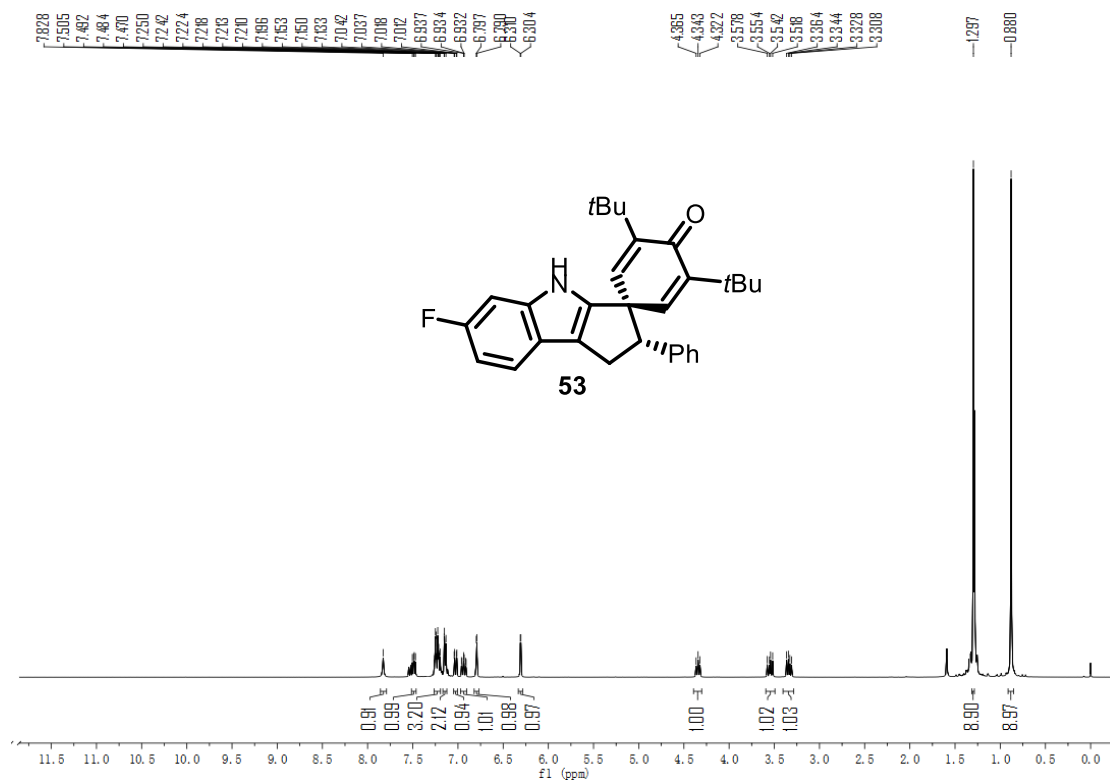

**<sup>13</sup>C NMR (100 MHz, CDCl<sub>3</sub>):**

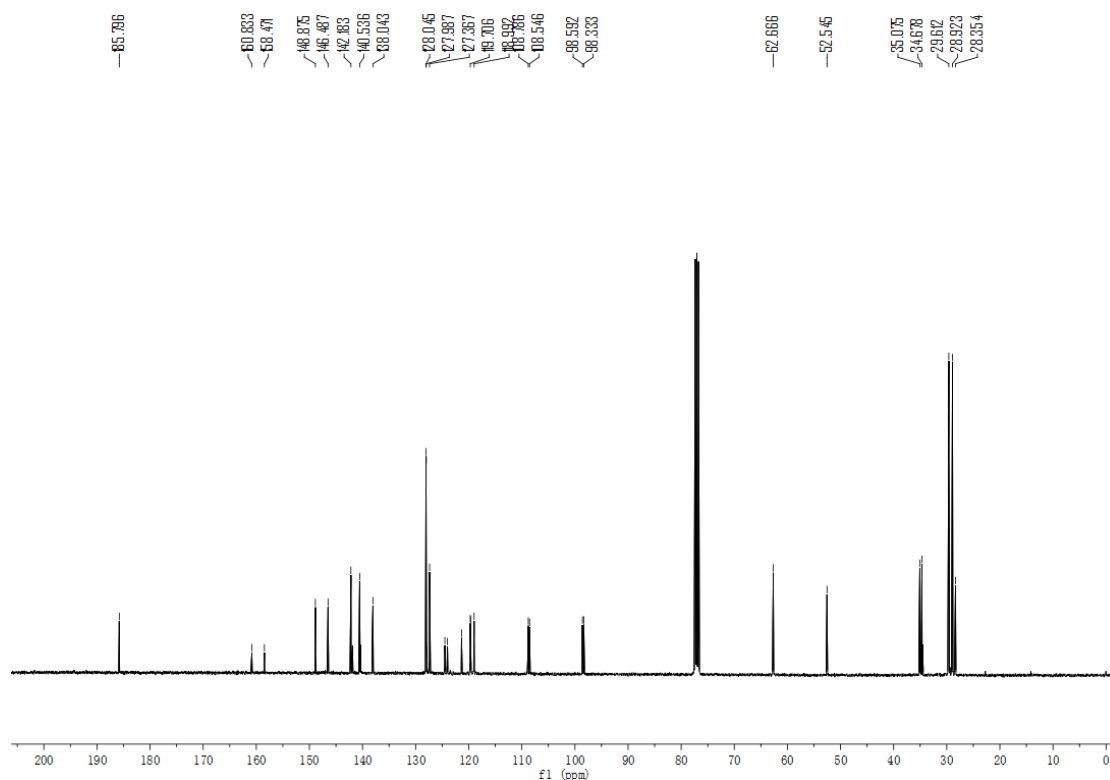

**<sup>19</sup>F NMR (376 MHz, CDCl<sub>3</sub>)**

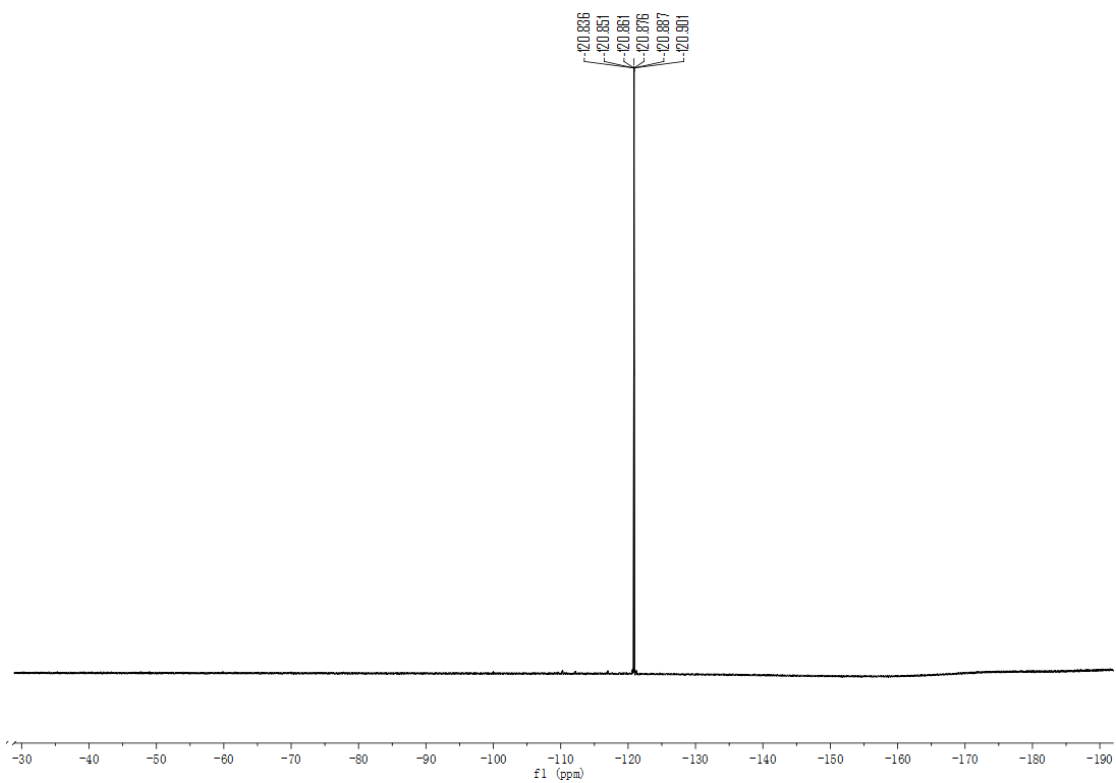

**DEPT**

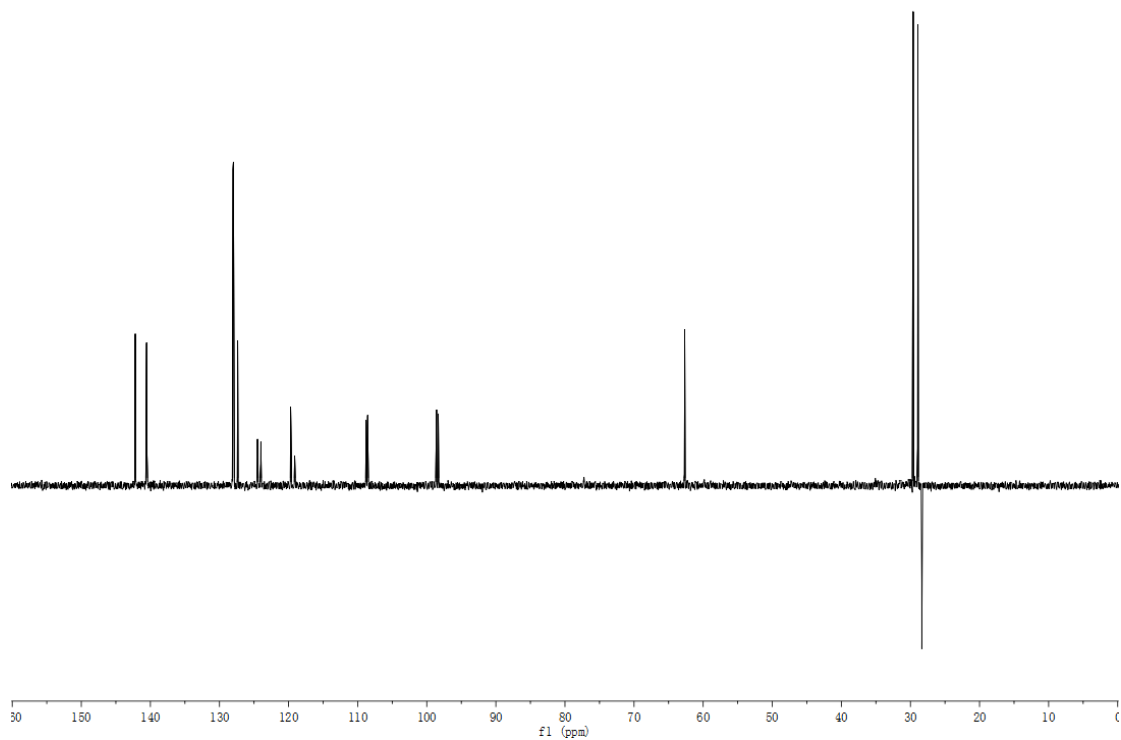

***3,5-di-tert-butyl-2'-(o-tolyl)-1',4'-dihydro-2'H-spiro[cyclohexane-1,3'-cyclopenta[b]indole]-2,5-dien-4-one (54)***

**<sup>1</sup>H NMR (400 MHz, CDCl<sub>3</sub>):**



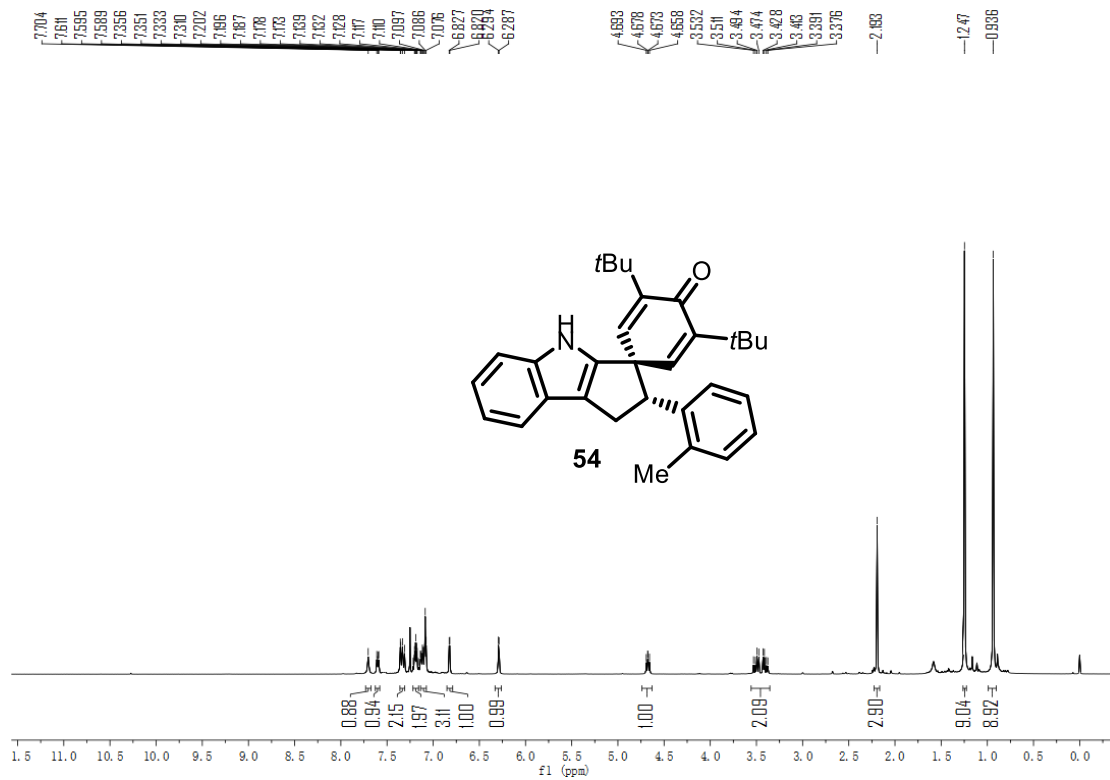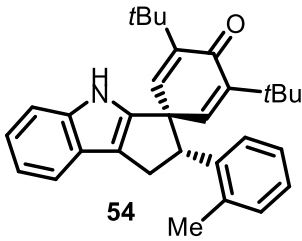

**<sup>13</sup>C NMR (100 MHz, CDCl<sub>3</sub>):**

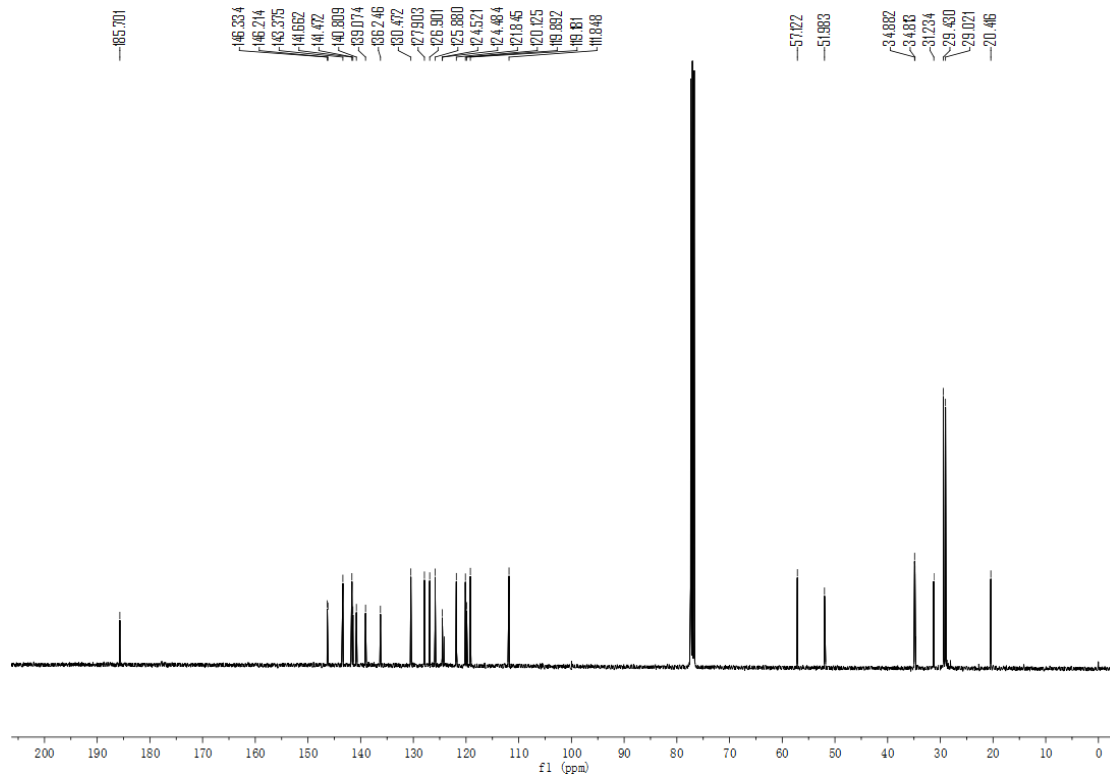

**DEPT**

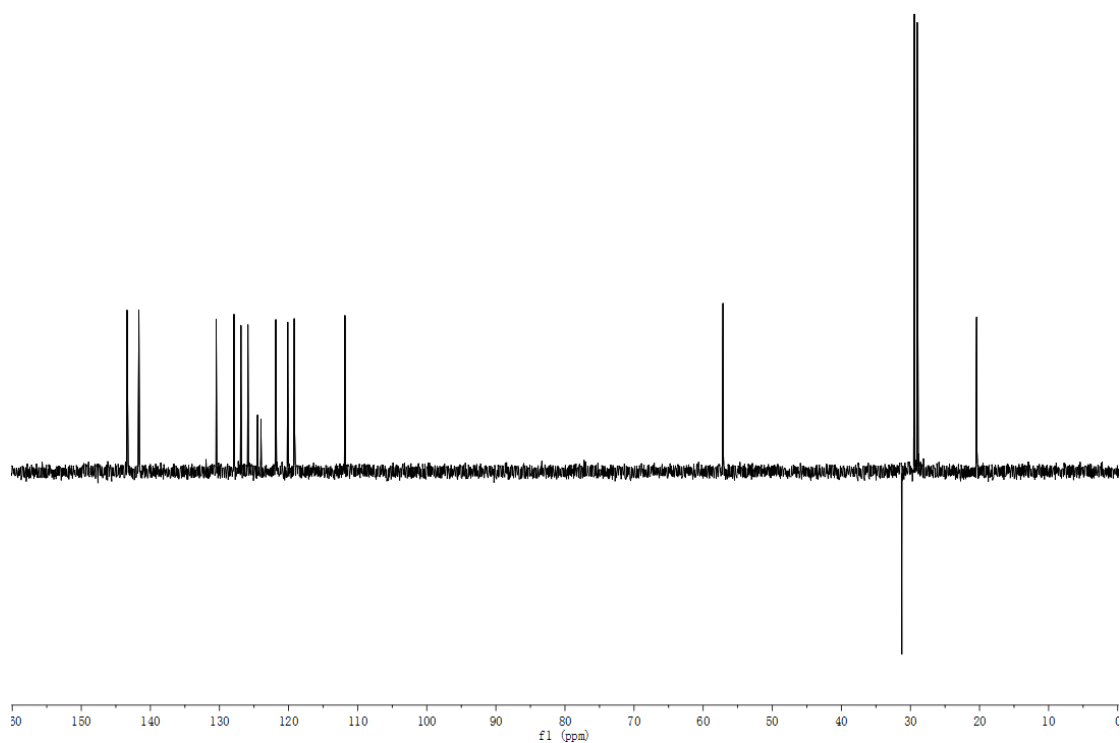

**3,5-di-tert-butyl-2'-(3,4-dimethylphenyl)-1',4'-dihydro-2'H-spiro[cyclohexane-1,3'-cyclopenta[b]indole]-2,5-dien-4-one (55)**

**<sup>1</sup>H NMR (400 MHz, CDCl<sub>3</sub>):**

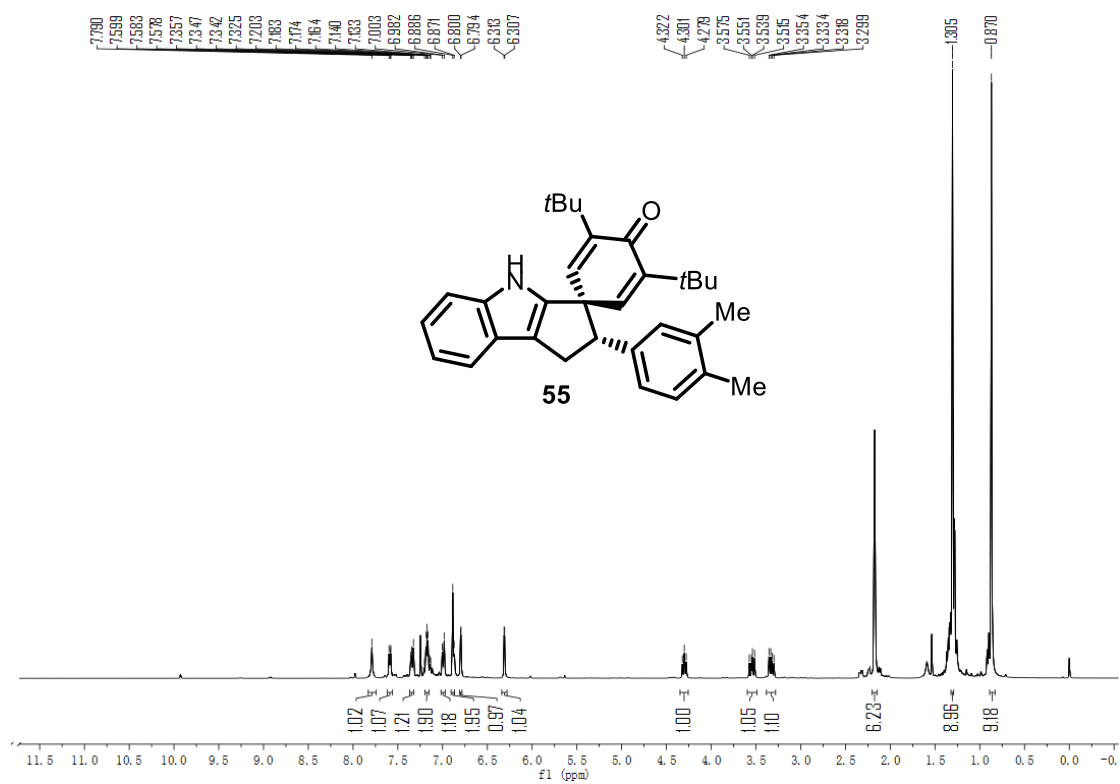

**<sup>13</sup>C NMR (100 MHz, CDCl<sub>3</sub>):**

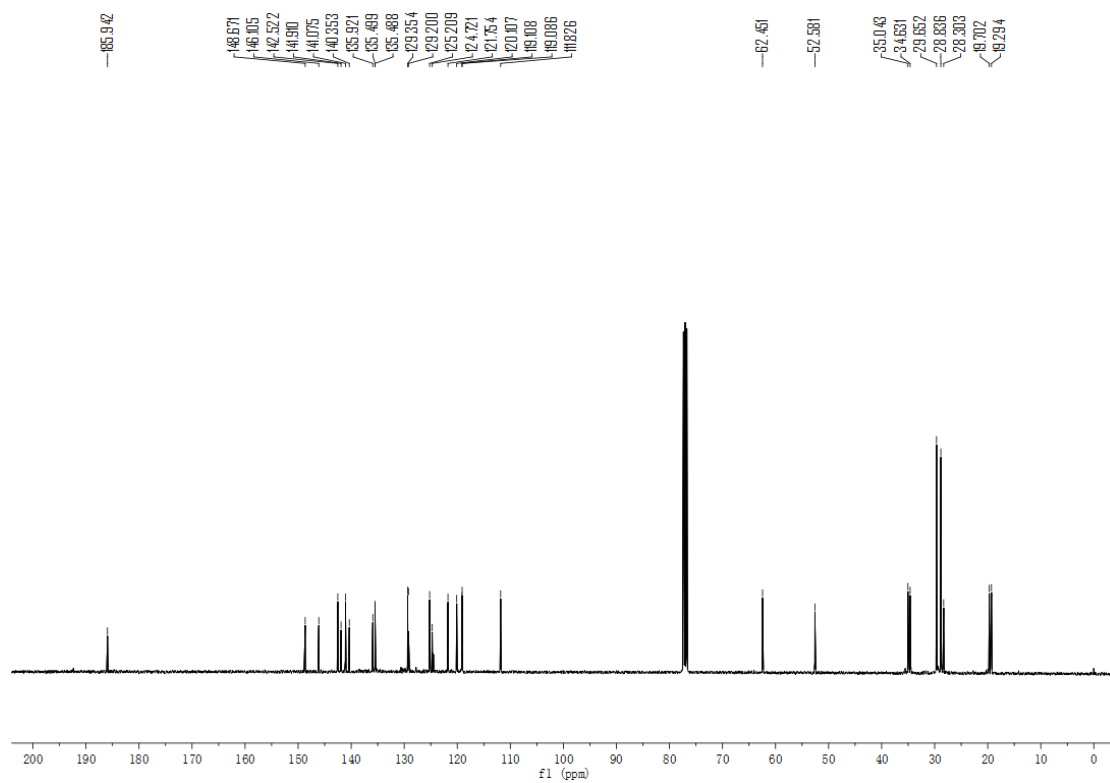

**DEPT**

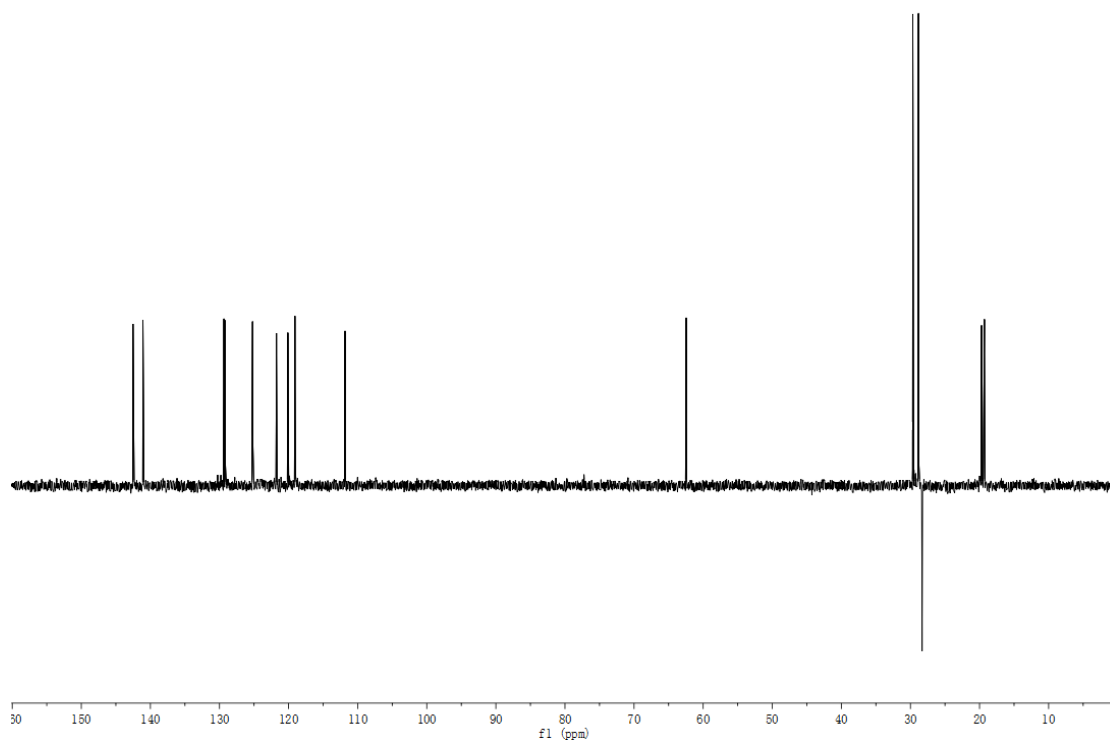

***3,5-di-tert-butyl-2'-(3,4,5-trimethoxyphenyl)-1',4'-dihydro-2'H-spiro[cyclohexane-1,3'-cyclopenta[*b*]indole]-2,5-dien-4-one (56)***

**<sup>1</sup>H NMR (400 MHz, CDCl<sub>3</sub>):**

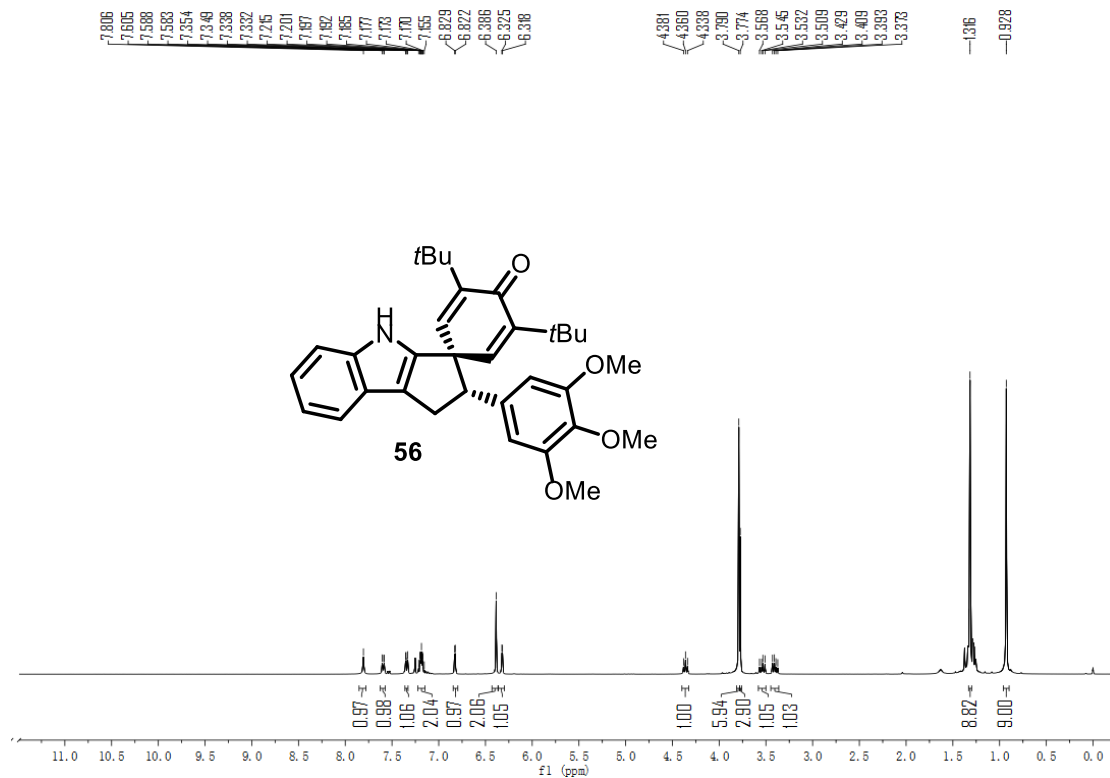

**<sup>13</sup>C NMR (100 MHz, CDCl<sub>3</sub>):**

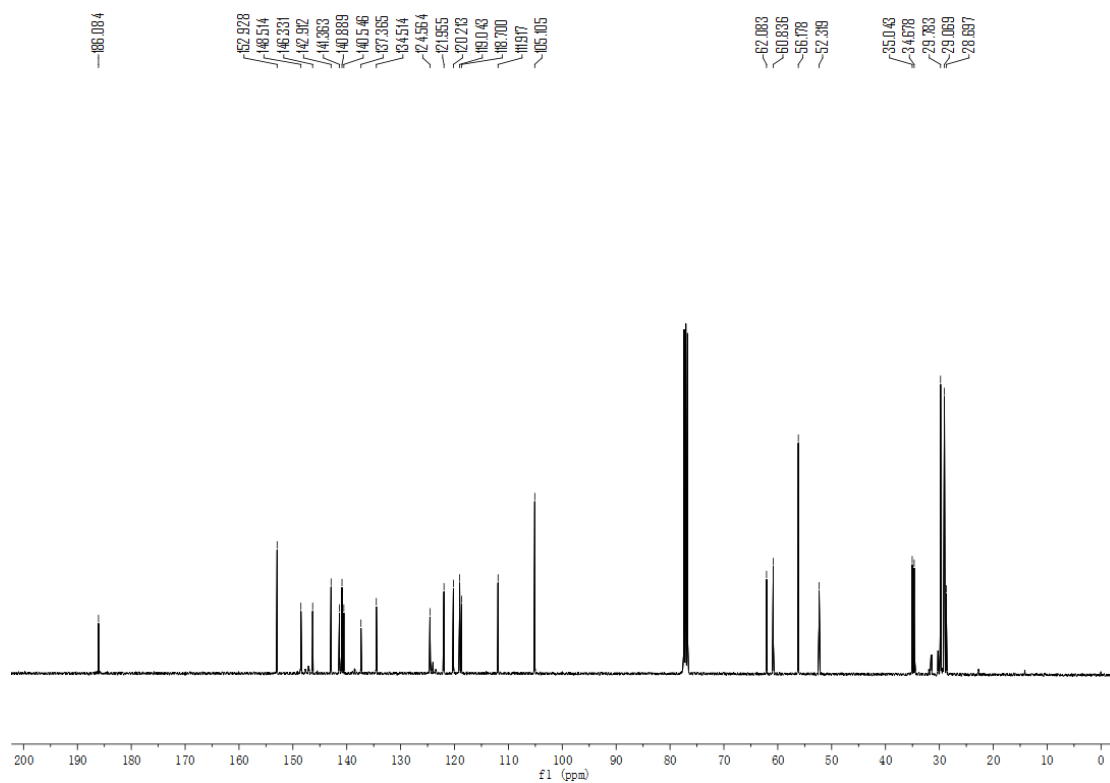

**DEPT**

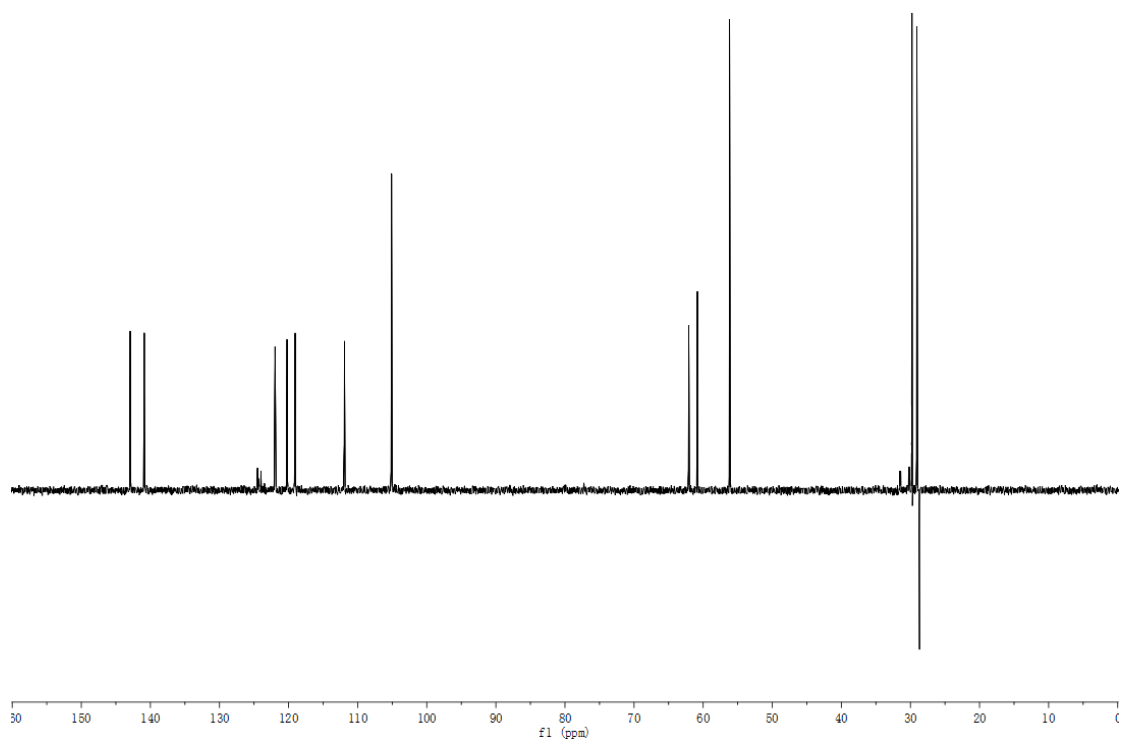

**2'-([1,1'-biphenyl]-4-yl)-3,5-di-tert-butyl-1',4'-dihydro-2'H-spiro[cyclohexane-1,3'-cyclopenta[b]indole]-2,5-dien-4-one (57)**

**<sup>1</sup>H NMR (400 MHz, CDCl<sub>3</sub>):**

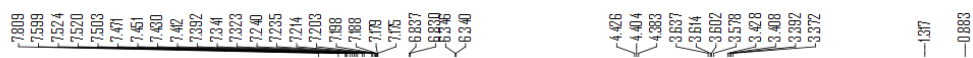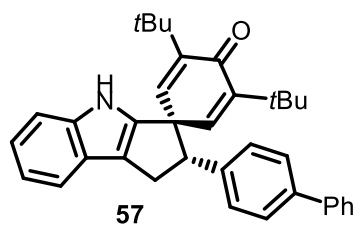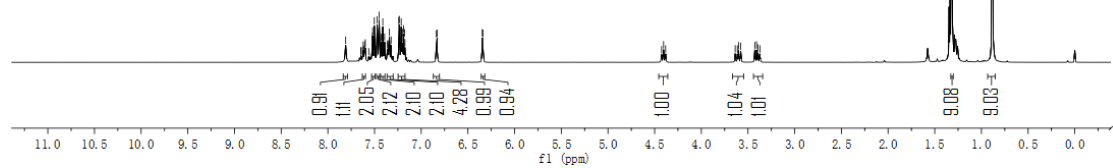

**<sup>13</sup>C NMR (100 MHz, CDCl<sub>3</sub>):**

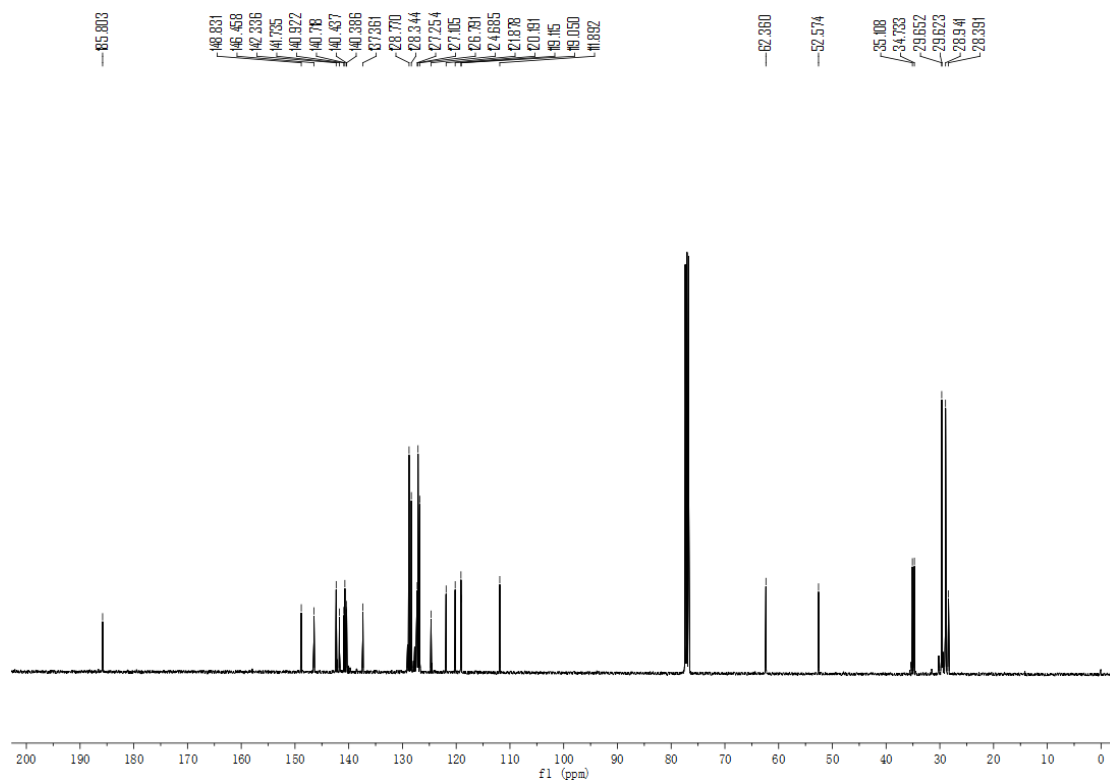

**DEPT**

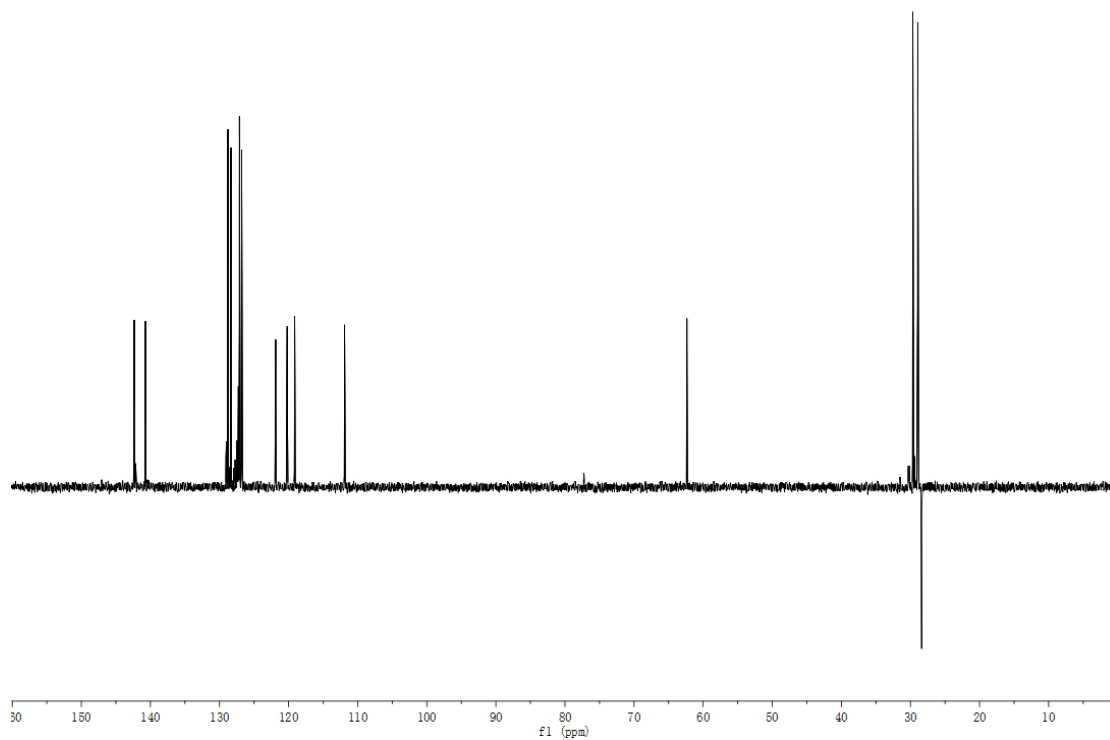

***3,5-di-tert-butyl-2'-(4-chlorophenyl)-1',4'-dihydro-2'H-spiro[cyclohexane-1,3'-cyclopenta[b]indole]-2,5-dien-4-one (58)***

**<sup>1</sup>H NMR (400 MHz, CDCl<sub>3</sub>):**

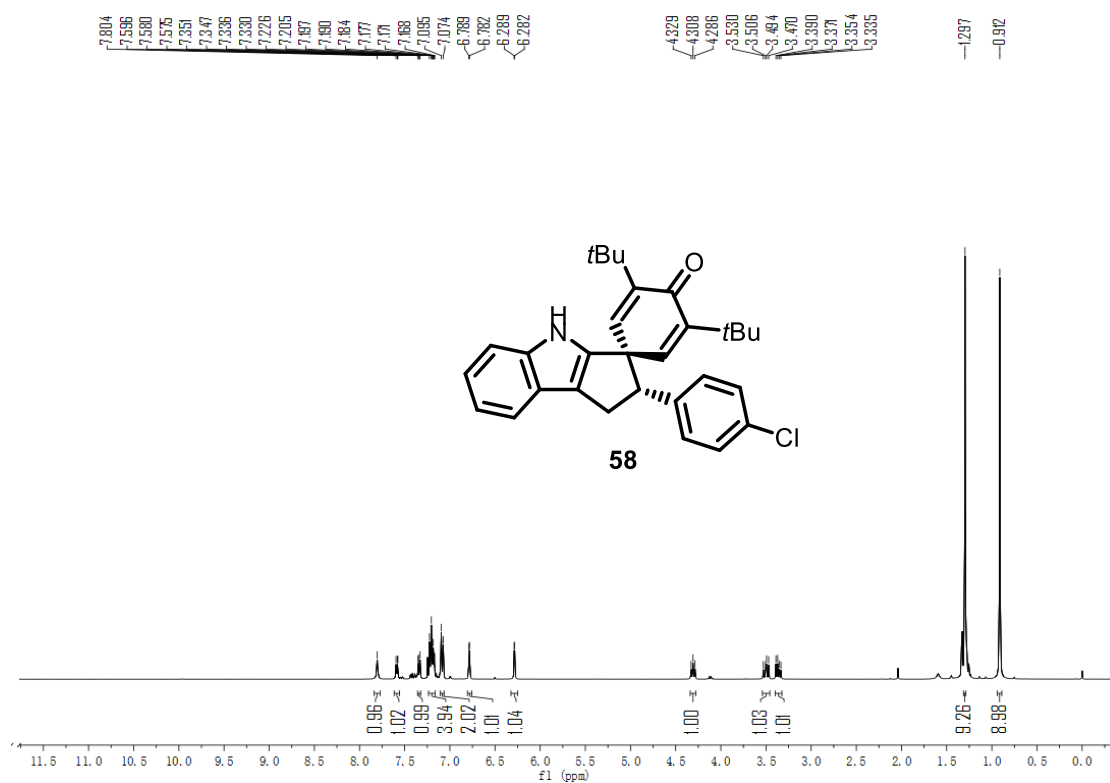

**<sup>13</sup>C NMR (100 MHz, CDCl<sub>3</sub>):**

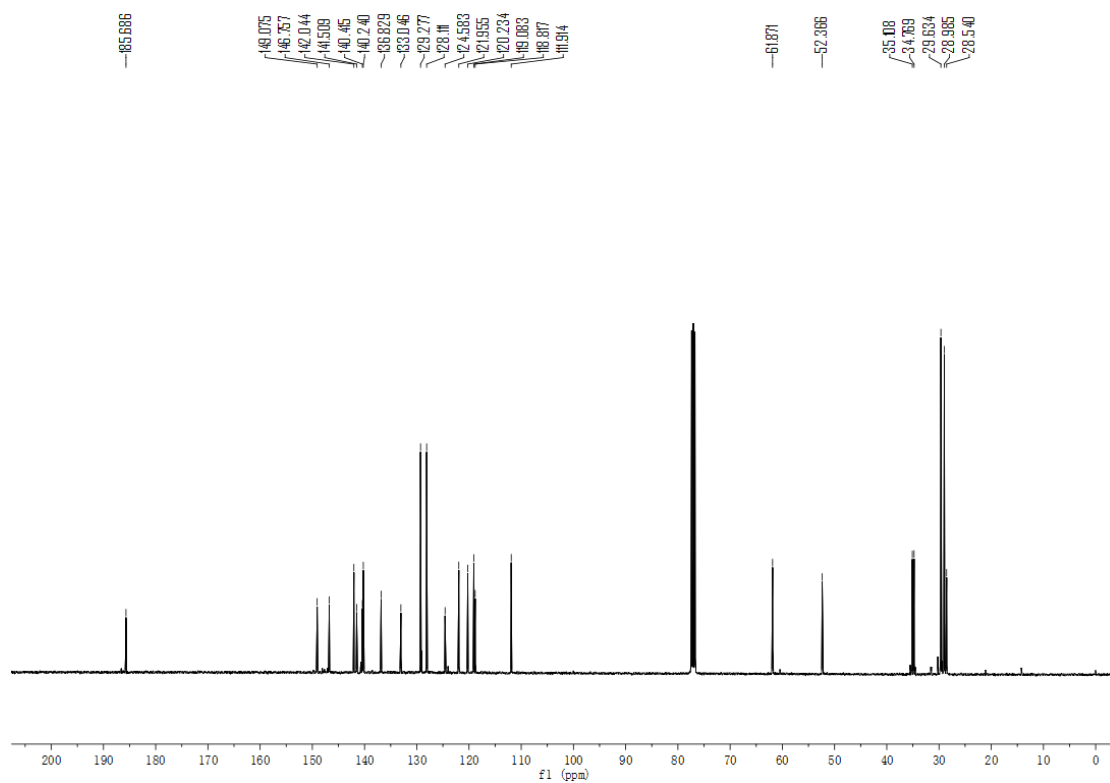

**DEPT**

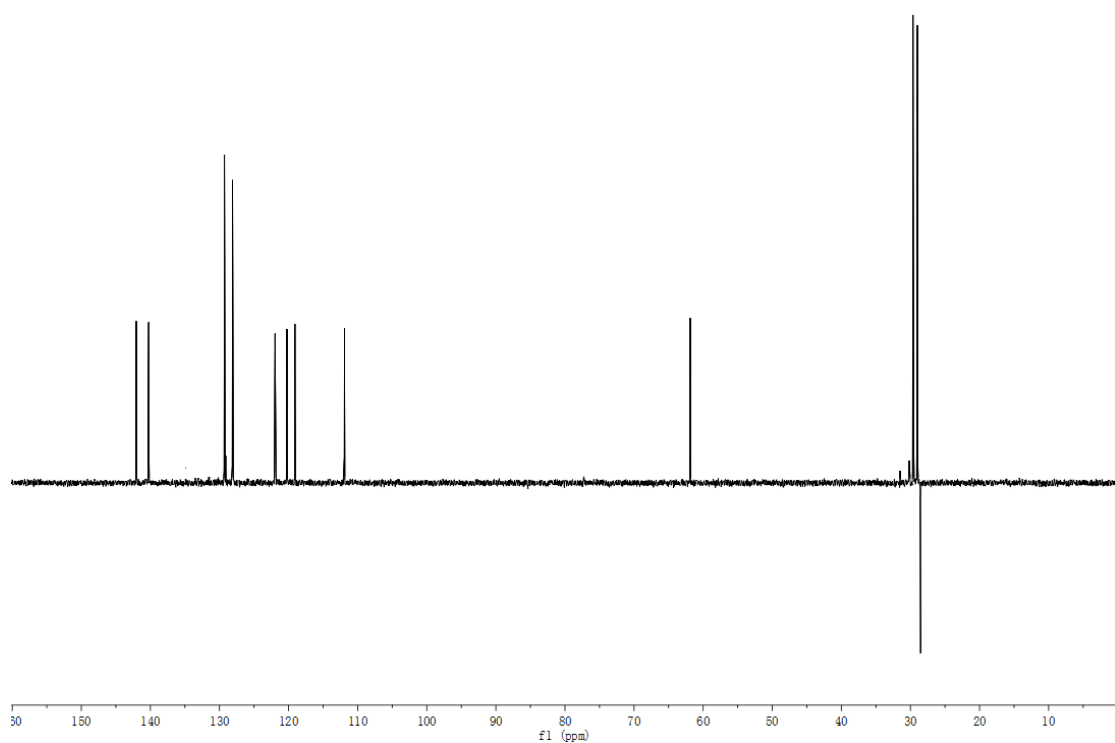

**3,5-di-tert-butyl-2'-(4-(trifluoromethyl)phenyl)-1',4'-dihydro-2'H-spiro[cyclohexane-1,3'-cyclopenta[b]indole]-2,5-dien-4-one (59)**

**<sup>1</sup>H NMR (400 MHz, CDCl<sub>3</sub>):**

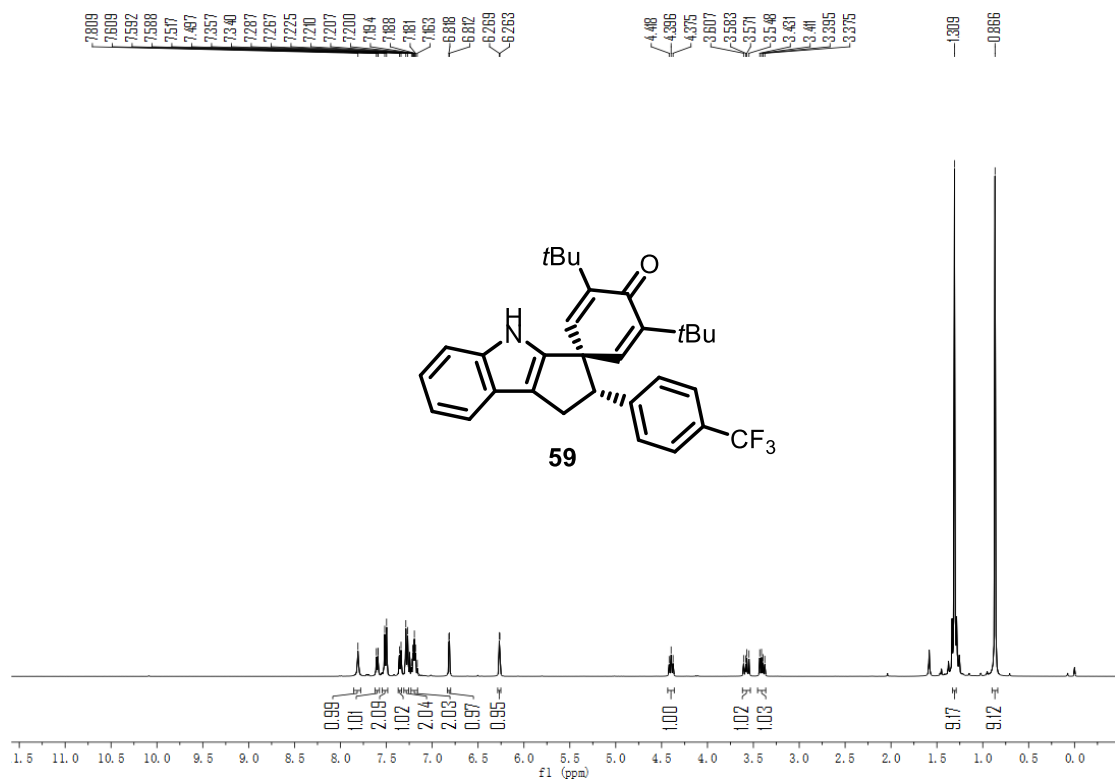

**<sup>13</sup>C NMR (100 MHz, CDCl<sub>3</sub>):**



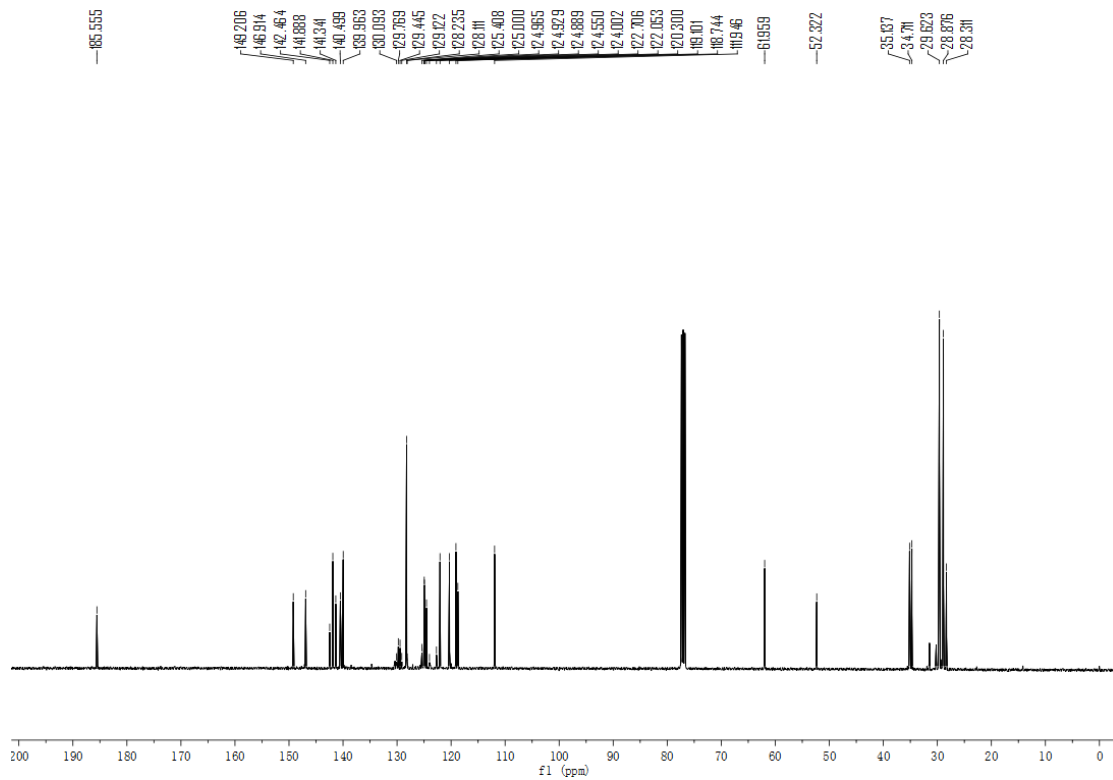

**<sup>19</sup>F NMR (400 MHz, CDCl<sub>3</sub>):**

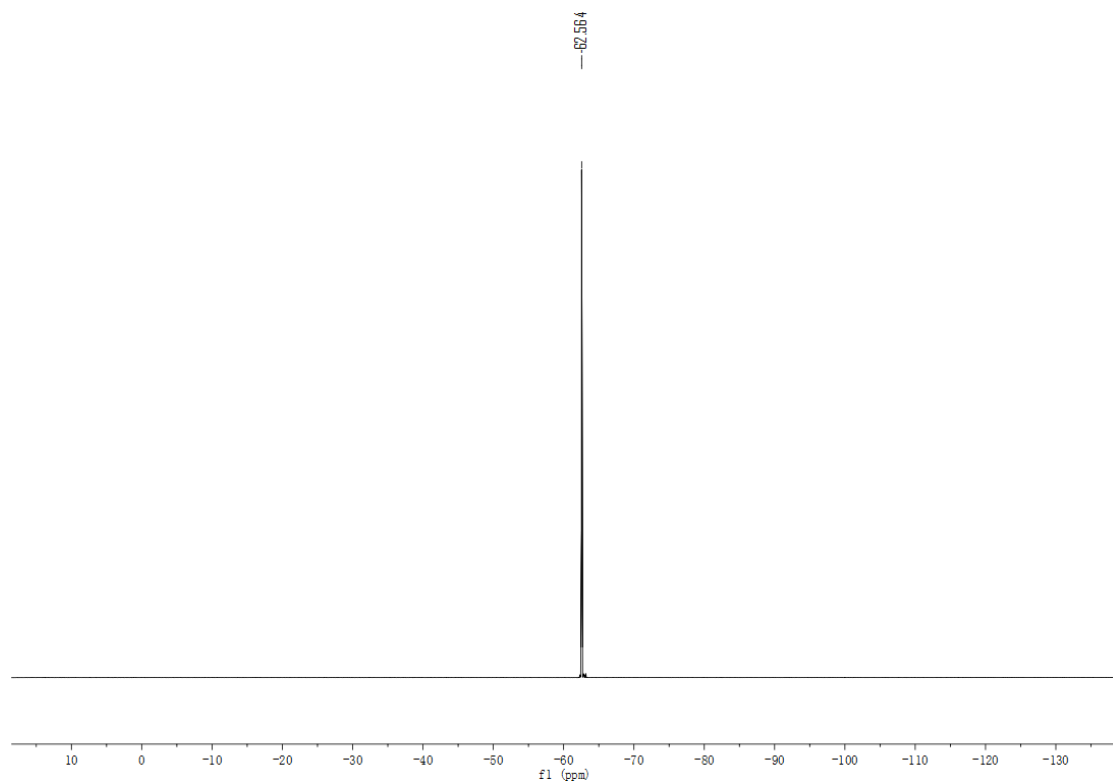

**DEPT**

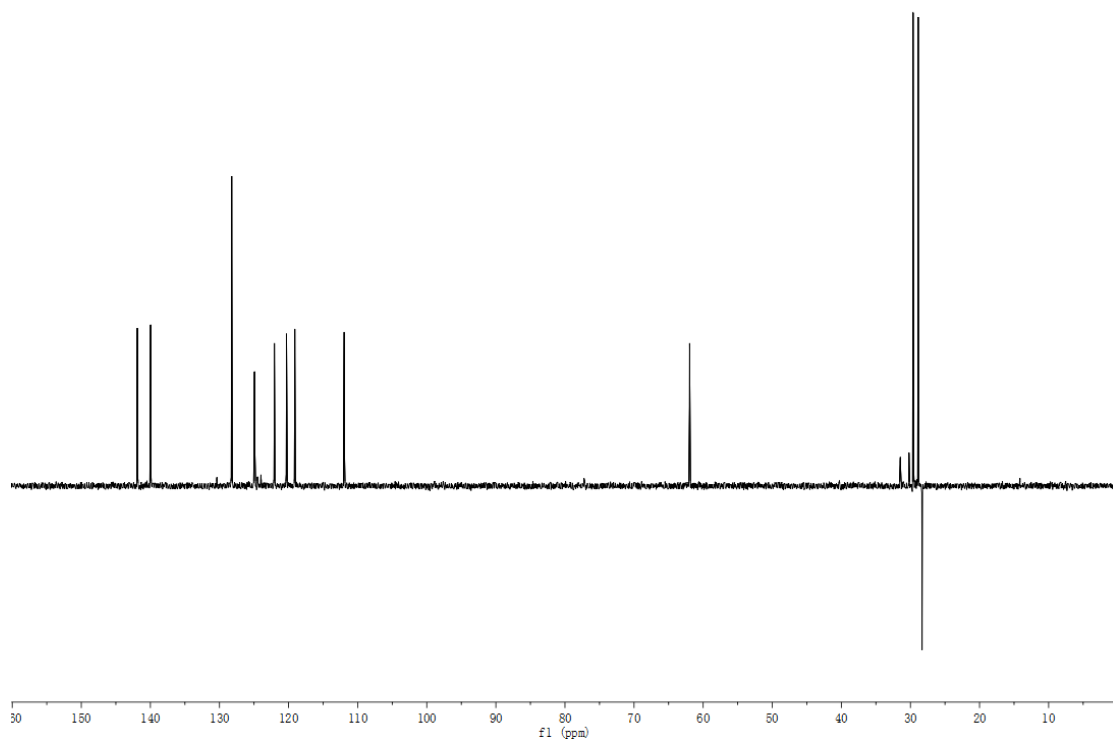

**3,5-di-tert-butyl-2'-(thiophen-2-yl)-1',4'-dihydro-2'H-spiro[cyclohexane-1,3'-cyclopenta[b]indole]-2,5-dien-4-one (60)**

**<sup>1</sup>H NMR (400 MHz, CDCl<sub>3</sub>):**

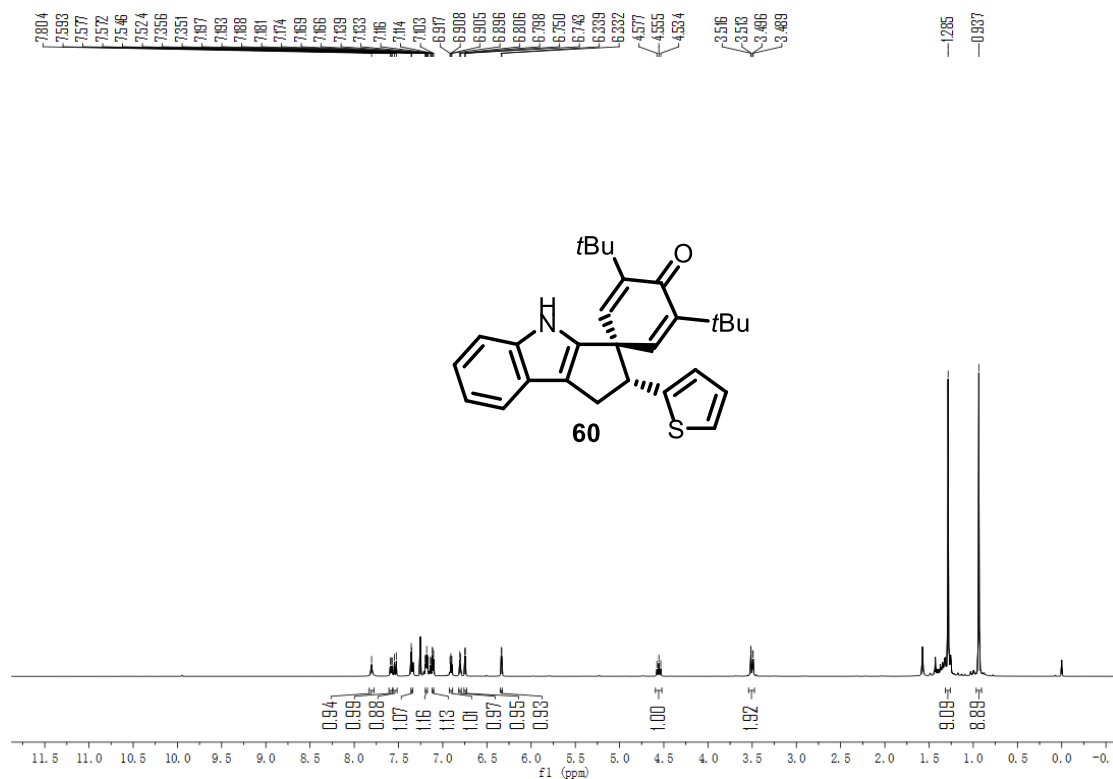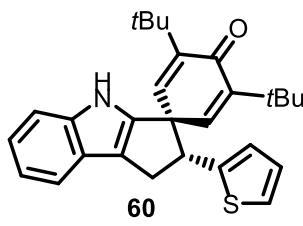

**<sup>13</sup>C NMR (100 MHz, CDCl<sub>3</sub>):**

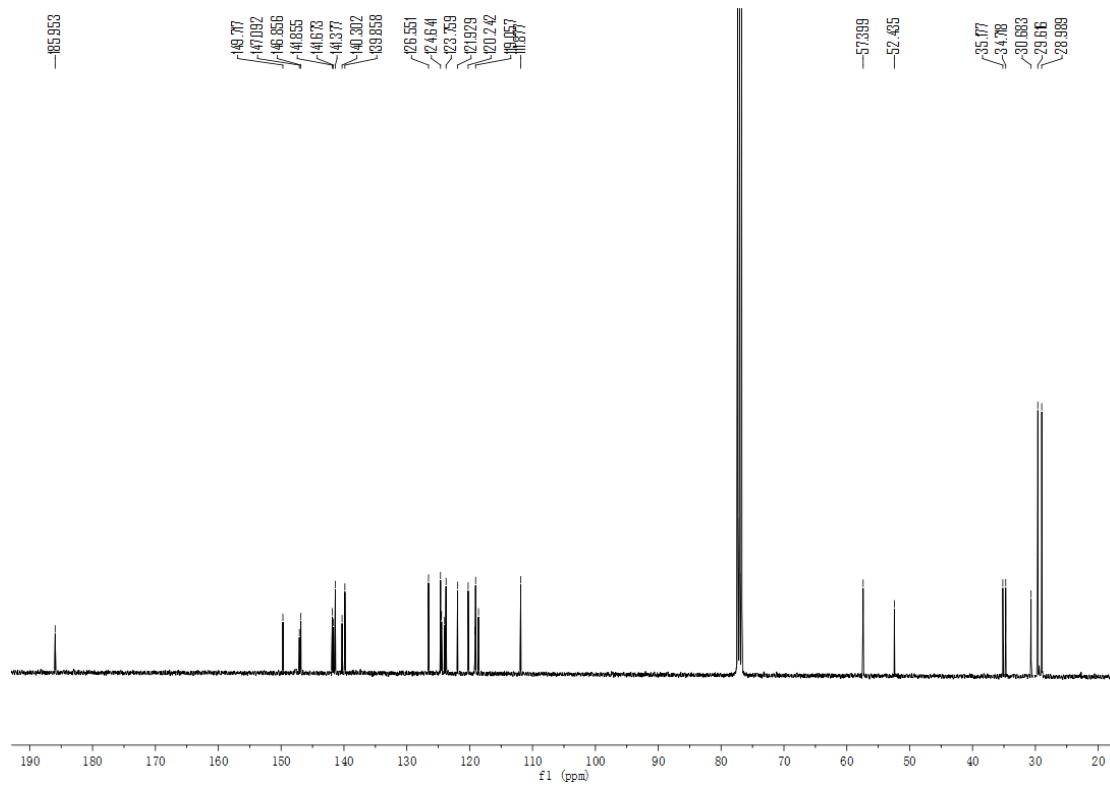

**DEPT**

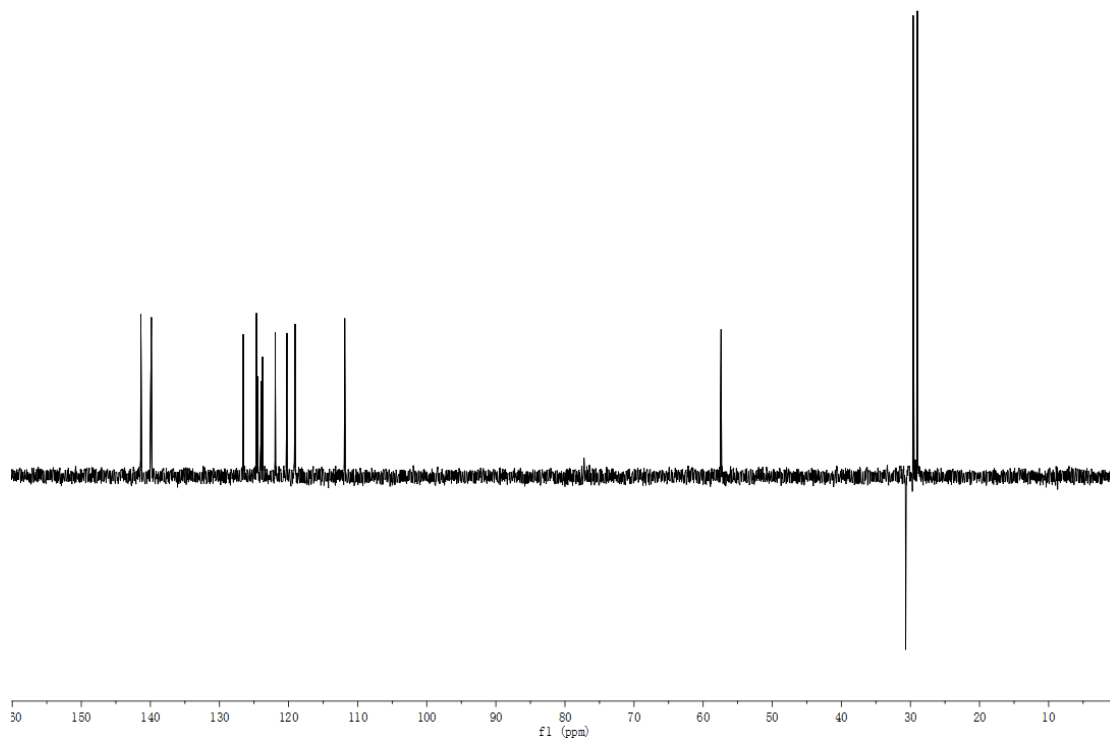

**2'-(4-bromothiophen-2-yl)-3,5-di-tert-butyl-1',4'-dihydro-2'H-spiro[cyclohexane-1,3'-cyclopenta[b]indole]-2,5-dien-4-one (61)**

**<sup>1</sup>H NMR (400 MHz, CDCl<sub>3</sub>):**

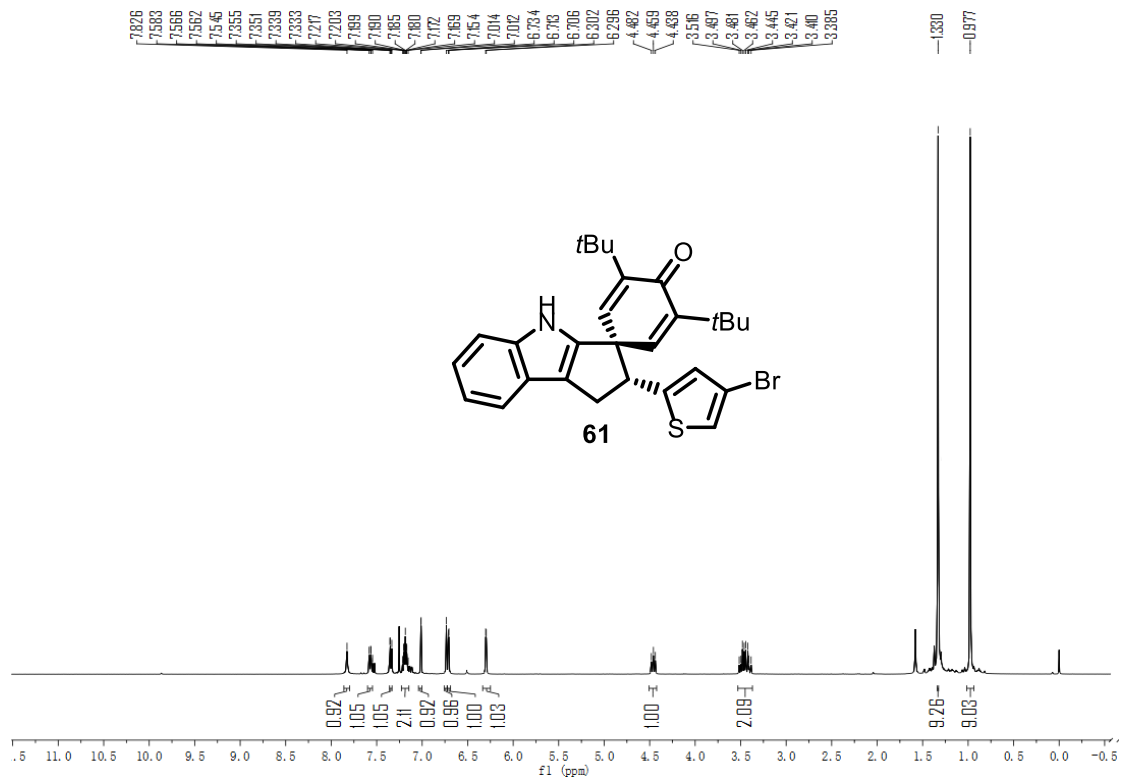

**<sup>13</sup>C NMR (100 MHz, CDCl<sub>3</sub>):**

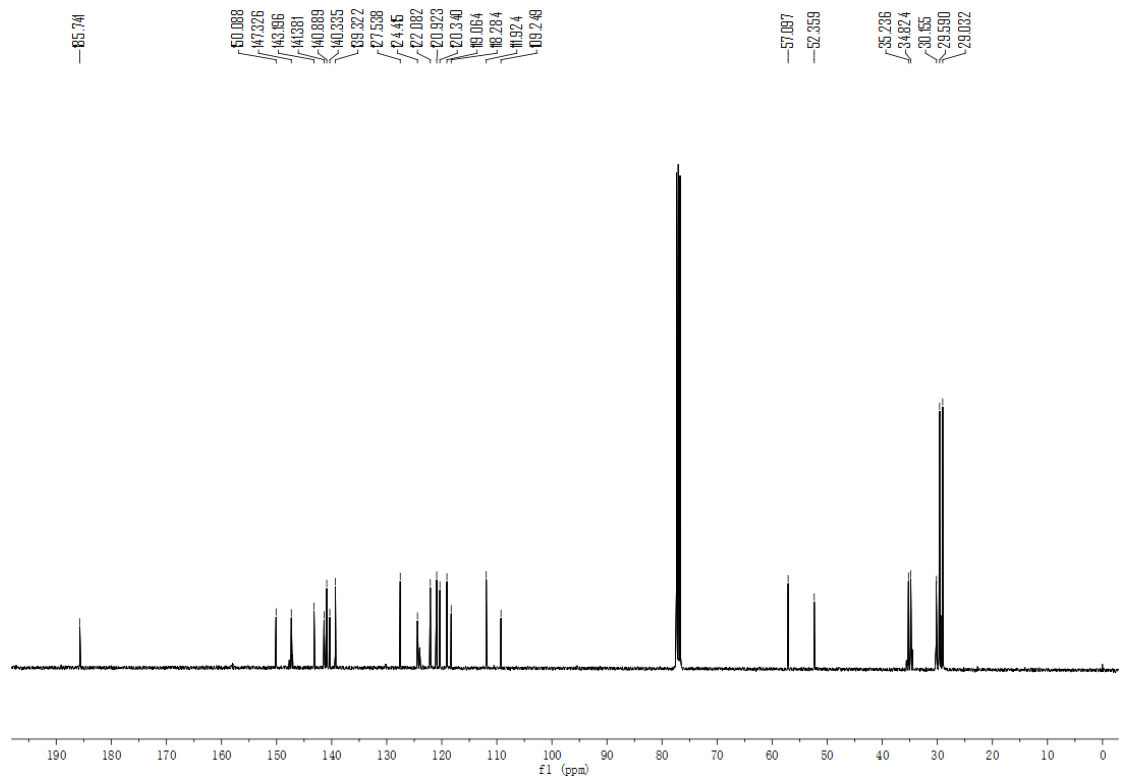

**DEPT**

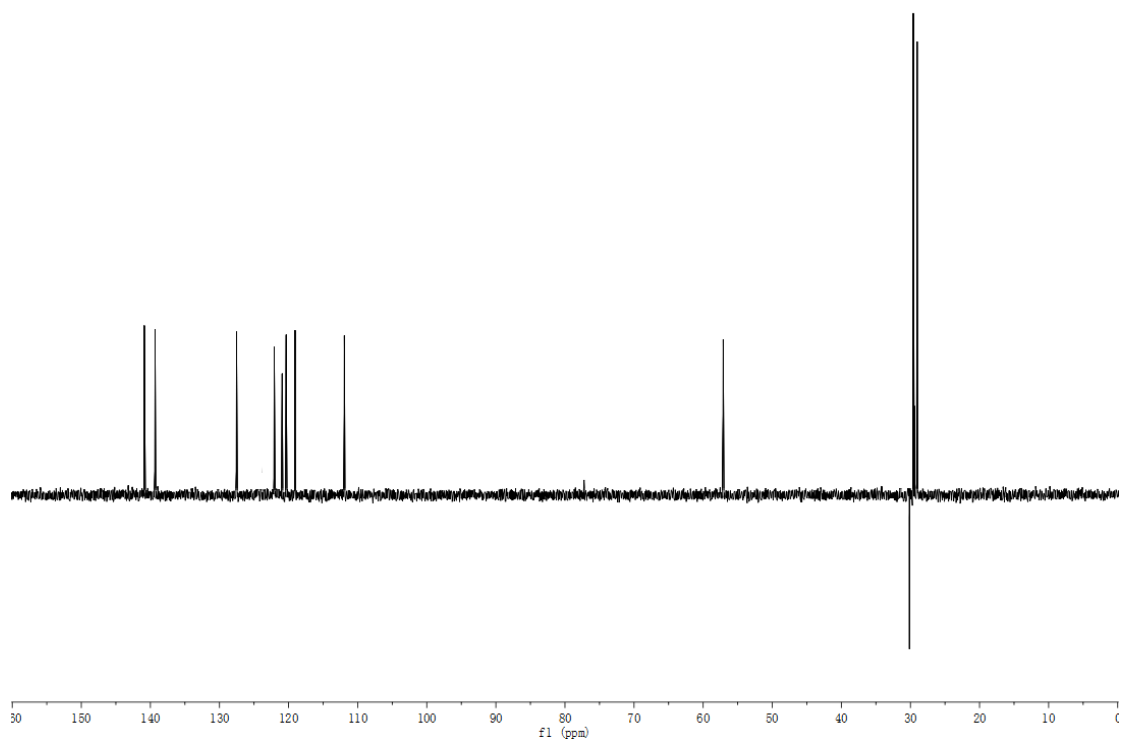

**(3,5-di-tert-butyl-4-hydroxyphenyl)(phenyl)methanone (62)**

**<sup>1</sup>H NMR (400 MHz, CDCl<sub>3</sub>):**

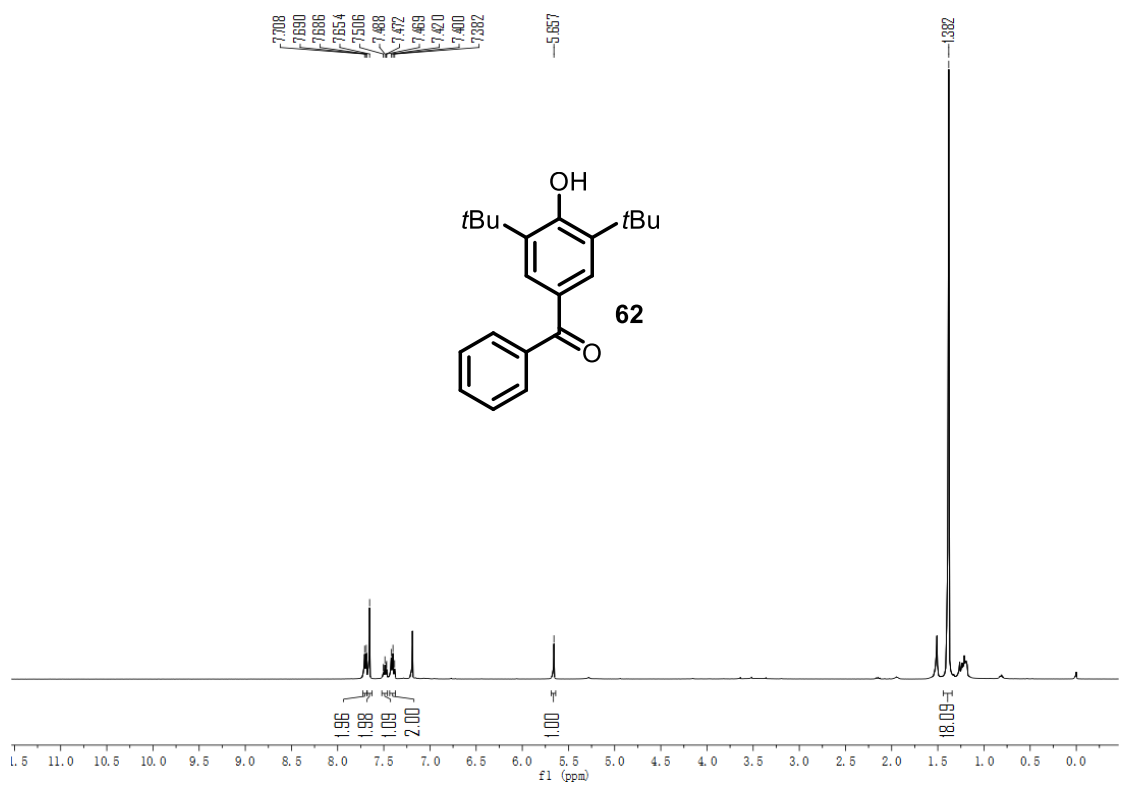

**<sup>13</sup>C NMR (100 MHz, CDCl<sub>3</sub>):**

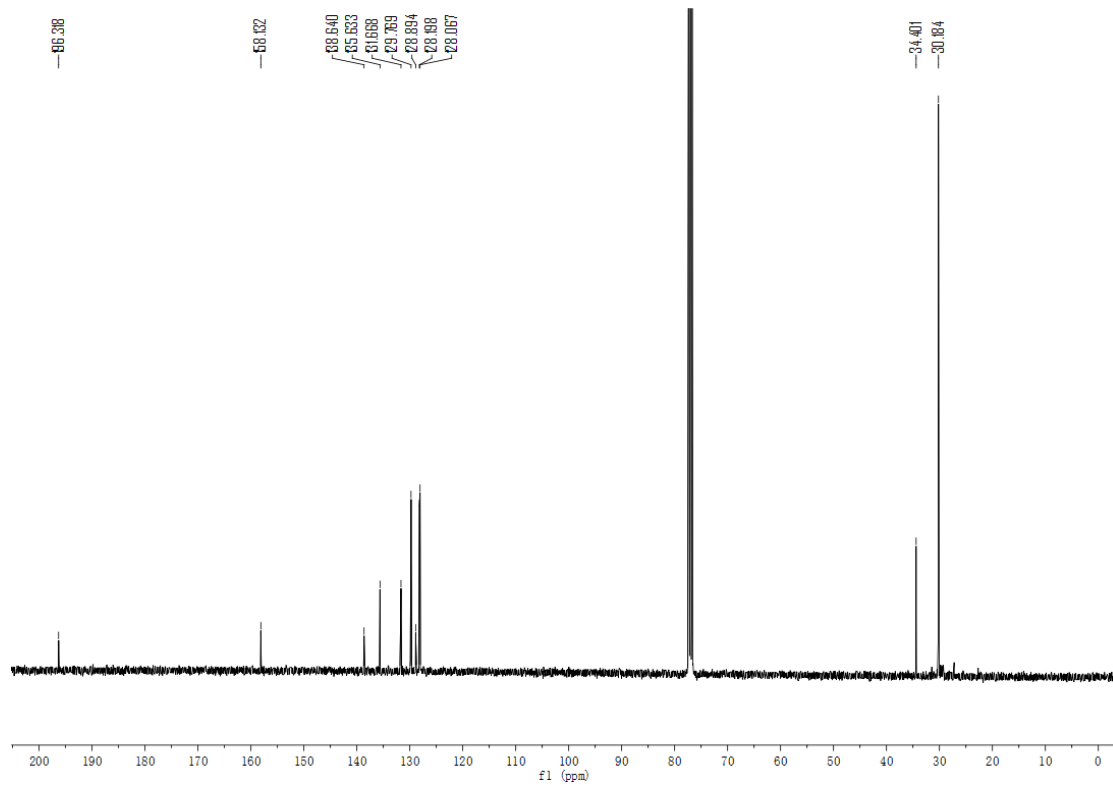

**DEPT**

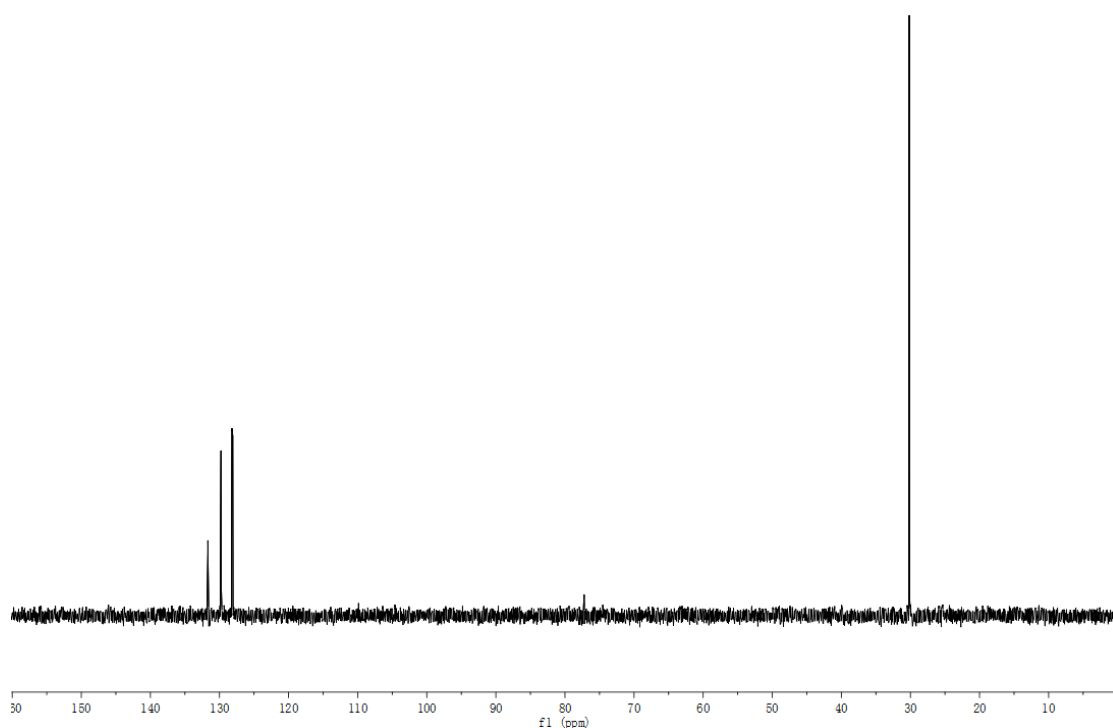

**2-((1H-indol-3-yl)methyl)-1H-indole-3-carbaldehyde (66)**

**<sup>1</sup>H NMR (400 MHz, CDCl<sub>3</sub>):**

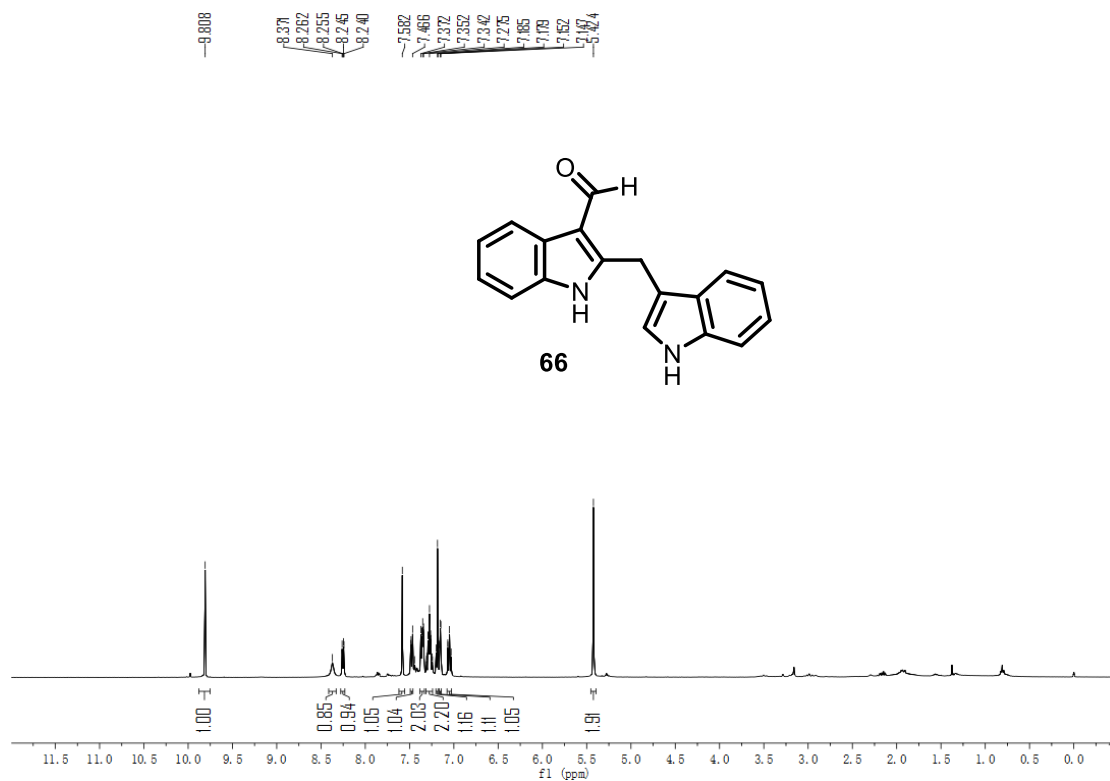

<sup>13</sup>C NMR (100 MHz, CDCl<sub>3</sub>):

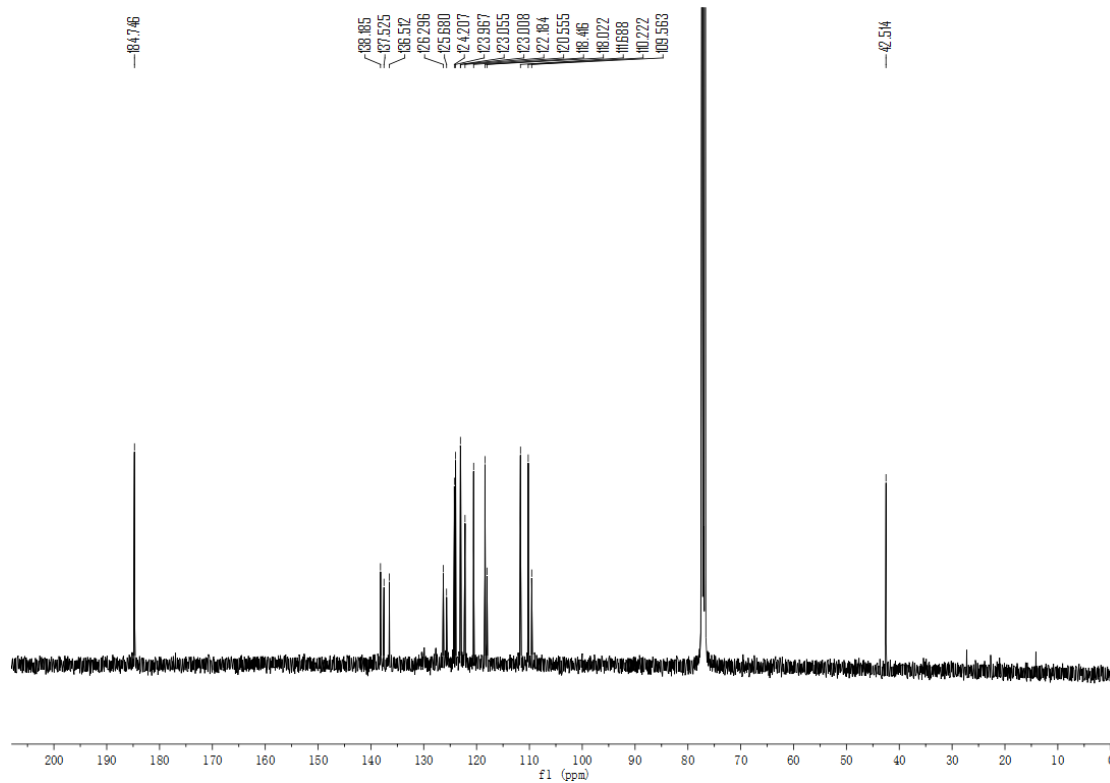

DEPT

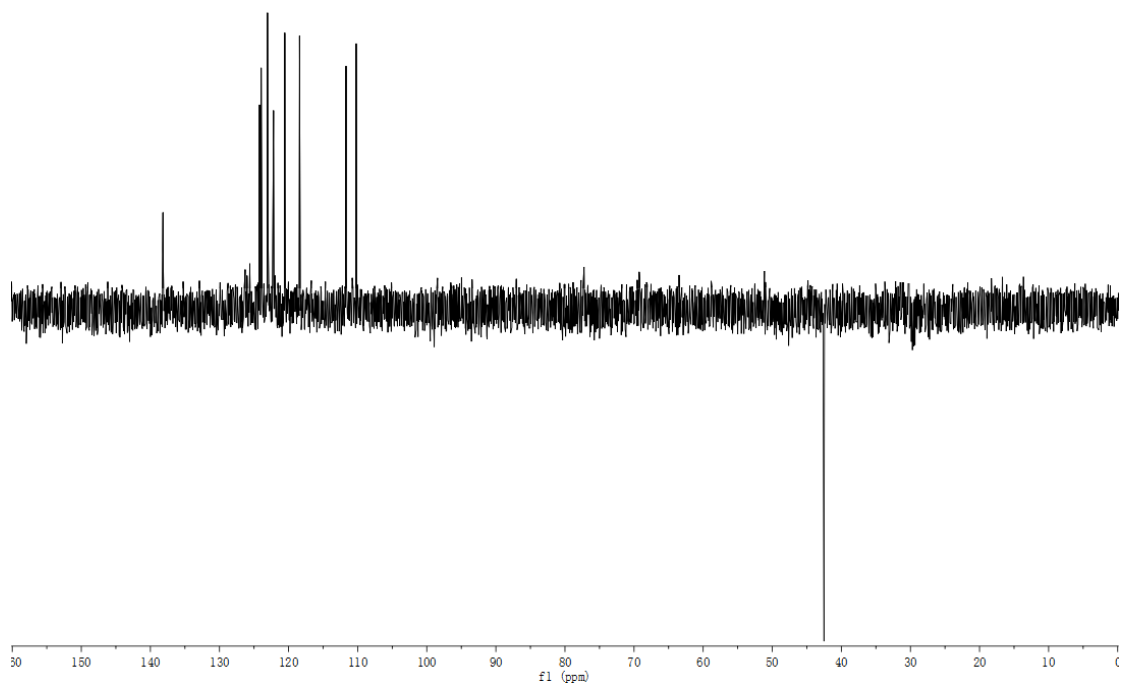

Supplement: d3qo00026e1.pdf [file d3qo00026e1.pdf]
